# Supplementary material for: Design, synthesis and application of a new type of bifunctional Le-Phos in highly enantioselective γ-addition reactions of N-centered nucleophiles to allenoates
Source: Royal Society of Chemistry journal article supplement (doi:10.1039/c9sc04073k), 2019-01-01

# Supporting Information

## D Design, Synthesis and Application of a New Type of Bifunctional Le-Phos in Highly Enantioselective $\gamma$ -Addition Reactions of *N*-centered Nucleophiles to Allenates

Haile Qiu<sup>+</sup>, Xiaofeng Chen<sup>+</sup> and Junliang Zhang\*

Shanghai Key Laboratory of Green Chemistry and Chemical Processes, School of Chemistry and Molecular Engineering, East China Normal University, 3663 N. Zhongshan Road, Shanghai 200062, P. R. China;

Department of Chemistry, Fudan University, 2005 Songhu Road, Shanghai 200438, P.R. China

Email: [jlzhang@chem.ecnu.edu.cn](mailto:jlzhang@chem.ecnu.edu.cn); [junliangzhang@fudan.edu.cn](mailto:junliangzhang@fudan.edu.cn)

|                                                                                                                                                                                                                                                            |     |
|------------------------------------------------------------------------------------------------------------------------------------------------------------------------------------------------------------------------------------------------------------|-----|
| 1. General Information.....                                                                                                                                                                                                                                | S2  |
| 2. General procedure for the synthesis of catalysts.....                                                                                                                                                                                                   | S3  |
| 3. Optimization of reaction conditions.....                                                                                                                                                                                                                | S13 |
| 4. General procedure for the cascade reaction of 2-oxazolidones.....                                                                                                                                                                                       | S17 |
| 5. General procedure for cascade reaction of other <i>N</i> -centered nucleophiles.....                                                                                                                                                                    | S40 |
| 6. Experimental procedure, HPLC spectra for the transformations of <b>3ga</b> , <b>6aa</b> , <b>6lo</b> .....                                                                                                                                              | S70 |
| 7. The X-ray structure of ( <i>R<sub>P</sub></i> , <i>S</i> , <i>S</i> , <i>R<sub>S</sub></i> )- <b>L2</b> borane complex, ( <i>S<sub>P</sub></i> , <i>R</i> , <i>S</i> , <i>R<sub>S</sub></i> )- <b>L2</b> borane complex, <b>6ba</b> and <b>13</b> ..... | S81 |
| 8. References.....                                                                                                                                                                                                                                         | S85 |
| 9. NMR spectra.....                                                                                                                                                                                                                                        | S86 |

## 1. General Information:

Unless otherwise noted, all reactions were carried out under a argon atmosphere; materials obtained from commercial suppliers were used directly without further purification. The  $[\pm]D$  was recorded using PolAAr 3005 High Accuracy Polarimeter.  $^1H$  NMR spectra,  $^{13}C$  NMR spectra, and  $^{31}P$  NMR spectra were recorded on a Bruker 400 MHz spectrometer in  $CDCl_3$ . NMR experiments are reported in  $\delta$  units, parts per million (ppm), and were referenced to  $CDCl_3$  ( $\delta$  7.26 or 77.0 ppm) as the internal standard. The data is being reported as (s = singlet, d = doublet, dd = doublet of doublet, t = triplet, m = multiplet or unresolved, br = broad signal, coupling constant(s) in Hz, integration). Trichloromethane ( $CHCl_3$ ), carbon tetrachlorid, dichloromethane, dichloroethane and acetonitrile were freshly distilled from  $CaH_2$ ; tetrahydrofuran (THF), toluene and ether were dried with sodium benzophenone and distilled before use; Reactions were monitored by thin layer chromatography (TLC) using silicycle pre-coated silica gel plates. Flash column chromatography was performed on silica gel 60 (particle size 300-400 mesh ASTM, purchased from Yantai, China) and eluted with petroleum ether/ethyl acetate.

## 2. General procedure for the synthesis of catalysts:

### 2.0 Synthesis of 1-phenylphospholane borane complex:<sup>[1]</sup>

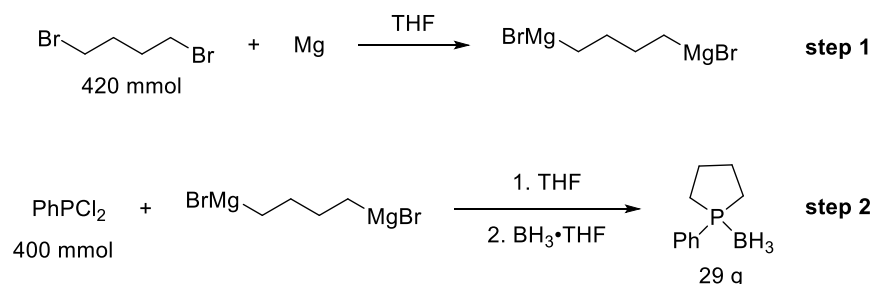

**Step 1:** Three-mouth flask of 3 liters was used for the reaction. 1,4-Dibromobutane (48 mL, 0.40 mol) diluted with 400 mL THF was slowly added to a stirred suspension of Mg (24 g, 0.99 mol) in THF at 0 °C under an argon atmosphere over a period of 30 min. Then the mixture was allowed to warm to room temperature.

**Step 2:** After the mixture was stirred for 2 h, the three-mouth flask was placed at -20 °C and dichlorophenylphosphine (0.40 mol in THF (400 mL)) was slowly added over 60 min. The mixture was allowed to warm to room temperature and stir for 12 h. Then the flask was placed at -20 °C. After  $\text{BH}_3\cdot\text{THF}$  complex (0.44 mol, 1.0 M THF solution,) was added over 1 h, the mixture was stirred for 8 h at room temperature. Then the flask was placed at -20 °C, followed by hydrolysis with 100 mL of saturated  $\text{NH}_4\text{Cl}$ . The organic layer was separated, the aqueous phase was extracted three times with EtOAc (4×100 mL). The combined organic phases were washed with brine, dried over anhydrous  $\text{Na}_2\text{SO}_4$  and the solvents were removed in vacuo. The residue was purified by silica gel chromatography (PE/EtOAc = 20:1–10:1). Distillation under reduced pressure (b.p. 190 °C/20 mm Hg) gave 1-phenylphospholane borane complex (29 g, 40%).

### 2.1 Synthesis of catalysts:

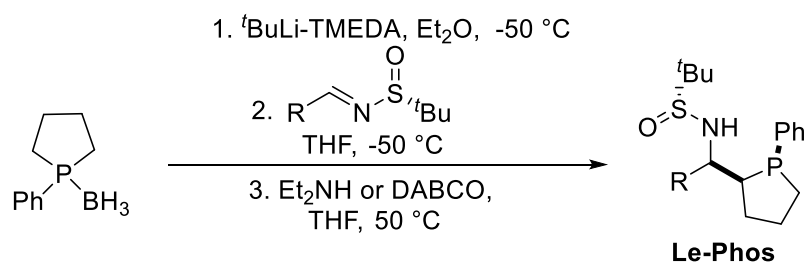

6.0 mmol  $t$ BuLi (1.3 M in hexane) was slowly added to a Schlenk tube flask that containing anhydrous TMEDA (6.0 mmol) at  $-50\text{ }^{\circ}\text{C}$  in  $\text{Et}_2\text{O}$  (4.0 mL), the mixture was stirred for 1 hour to a bright yellow precipitate. Then 1-phenylphospholane borane complex<sup>[1]</sup> (3.0 mmol) dissolved by ether (4.0 mL), was added slowly to the solution of  $t$ BuLi and TMEDA. The mixture was stirred for 4 hours, a wine precipitate was generated.

The solution of corresponding chiral sulfinyl imines (4.50 mmol chiral sulfinyl imines in 5.0 mL anhydrous THF) was added to the prepared mixture at  $-50\text{ }^{\circ}\text{C}$ . The mixture was stirred until the disappearance of 1-phenylphospholane borane complex as indicated by TLC, lasting approximately 6 hours, followed by hydrolysis with 10 mL of water. The organic layer was separated, the aqueous phase was extracted three times with EtOAc ( $3\times 10\text{ mL}$ ). The combined organic phases were dried over anhydrous  $\text{Na}_2\text{SO}_4$  and the solvents were removed in vacuo. The residue was purified by silica gel chromatography to afford the desired ( $R_P, S, S, R_S$ )-Le-Phos borane complex and ( $S_P, R, S, R_S$ )-Le-Phos borane complex, using petroleum ether/EtOAc as the eluent.

The Le-Phos borane complex was added to a Schlenk tube. Then  $\text{Et}_2\text{NH}$  (2.0 mL) was added to the Schlenk tube. The solution was stirred for 4 h at  $50\text{ }^{\circ}\text{C}$ , and concentrated.<sup>[2]</sup> Then the residue was purified by column chromatography ( $\text{SiO}_2$ , petroleum ether/EtOAc as the eluent) to afford the desired Le-Phos. Another way we added DABCO (4.0 mmol in 2.0 mL THF) to the Schlenk tube.<sup>[3]</sup> The solution was stirred for 4 h at  $50\text{ }^{\circ}\text{C}$ . 1N aq. HCl (5.0 mL) was added to the solution, The organic layer was separated, the aqueous phase was extracted three times with EtOAc ( $3\times 10\text{ mL}$ ). The combined organic phases were dried over anhydrous  $\text{Na}_2\text{SO}_4$  and the solvent were removed in vacuo. Then the residue was purified by silica gel chromatography using petroleum ether/EtOAc as the eluent to afford the desired Le-Phos.

## 2.2 Synthesis and general data of catalysts L1:



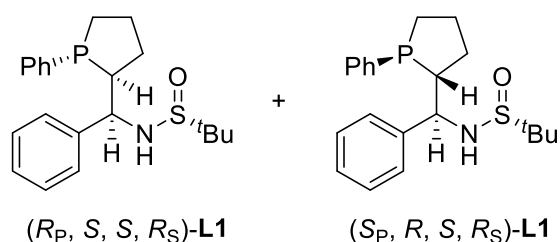

The general procedure was followed by using 1-phenylphospholane borane complex (534 mg, 3.0 mmol) dissolved by ether (4.0 mL) and the corresponding chiral sulfinyl imines (942 mg, 4.50 mmol chiral sulfinyl imines in 5.0 mL anhydrous THF). After purification by column chromatography (PE/EtOAc = 2:1),  $(R_P, S, S, R_S)\text{-L1}$  borane complex (523 mg, 45%) and  $(S_P, R, S, R_S)\text{-L1}$  borane complex (407 mg, 35%) were obtained as white solids (*d.r.* = 1.29 : 1).

### 2.2.1 Synthesis and general data of catalysts $(R_P, S, S, R_S)\text{-L1}$

The general procedure was followed by using  $(R_P, S, S, R_S)\text{-L1}$  borane complex (523 mg, 1.35 mmol) and  $\text{Et}_2\text{NH}$  (2.0 mL). The resulting solution was stirred at 50 °C for 5 hours and then concentrated under vacuum. The residue was purified by silica gel flash chromatography (20% EtOAc in PE) to afford  $(R_P, S, S, R_S)\text{-L1}$  as a white solid (454 mg, 90%).  $[\alpha]^{22}_{\text{D}} = -51.2$  (*c* 0.25, acetone);  $^1\text{H}$  NMR (400 MHz,  $\text{CDCl}_3$ )  $\delta$  7.44 – 7.38 (m, 2H), 7.38 – 7.31 (m, 2H), 7.30 – 7.26 (m, 1H), 7.25 – 7.16 (m, 5H), 4.48 (dt, *J* = 10.4, 7.6 Hz, 1H), 4.07 (dd, *J* = 8.0, 3.2 Hz, 1H), 2.89 – 2.74 (m, 1H), 2.11 – 2.03 (m, 1H), 2.03 – 1.88 (m, 2H), 1.88 – 1.75 (m, 1H), 1.69 – 1.58 (m, 1H), 1.55 – 1.41 (m, 1H), 1.23 (s, 9H);  $^{31}\text{P}$  NMR (162 MHz,  $\text{CDCl}_3$ )  $\delta$  -13.83;  $^{13}\text{C}$  NMR (100 MHz,  $\text{CDCl}_3$ )  $\delta$  142.75 (d, *J* = 5.4 Hz), 140.93, 140.72, 130.70 (d, *J* = 15.9 Hz), 128.60, 128.31 (d, *J* = 5.5 Hz), 127.62 (d, *J* = 4.6 Hz), 127.15 (d, *J* = 1.9 Hz), 63.86, 63.65, 56.59, 54.01 (d, *J* = 14.1 Hz), 33.39, 28.20 (d, *J* = 3.6 Hz), 26.89 (d, *J* = 10.5 Hz), 22.72; HRMS (ESI) calcd. For  $\text{C}_{21}\text{H}_{28}\text{NNaOPS}$   $[\text{M}+\text{Na}]^+$ : 396.1521, found: 396.1524.

### 2.2.2 Synthesis and general data of catalysts $(S_P, R, S, R_S)\text{-L1}$

The general procedure was followed by using  $(S_P, R, S, R_S)\text{-L1}$  borane complex (407 mg, 1.05 mmol) and  $\text{Et}_2\text{NH}$  (2.0 mL). The resulting solution was stirred at 50 °C for 5 hours and then concentrated under vacuum. The residue was purified by silica gel

flash chromatography (25% EtOAc in PE) to afford (*S<sub>P</sub>*, *R*, *S*, *R<sub>S</sub>*)-**L1** as a white solid (357 mg, 91%).  $[\alpha]^{22}_{\text{D}} = 82.4$  (*c* 0.25, acetone);  $^1\text{H}$  NMR (400 MHz,  $\text{CDCl}_3$ )  $\delta$  7.39 – 7.36 (m, 2H), 7.33 – 7.25 (m, 3H), 7.25 – 7.13 (m, 5H), 4.55 (td, *J* = 8.8, 6.4 Hz, 1H), 3.73 (d, *J* = 6.4 Hz, 1H), 2.96 – 2.83 (m, 1H), 2.30 – 2.13 (m, 1H), 2.02 – 1.88 (m, 2H), 1.78 – 1.66 (m, 2H), 1.55 – 1.41 (m, 1H), 1.18 (s, 9H);  $^{31}\text{P}$  NMR (162 MHz,  $\text{CDCl}_3$ )  $\delta$  -12.31;  $^{13}\text{C}$  NMR (100 MHz,  $\text{CDCl}_3$ )  $\delta$  142.11 (d, *J* = 2.6 Hz), 140.85, 140.63, 131.21 (d, *J* = 17.2 Hz), 128.43, 128.16 (d, *J* = 5.8 Hz), 127.91 (d, *J* = 4.0 Hz), 127.83, 127.74, 63.70, 63.41, 56.34, 52.52 (d, *J* = 14.2 Hz), 32.87, 28.37 (d, *J* = 3.6 Hz), 26.63 (d, *J* = 10.6 Hz), 22.64; HRMS (ESI) calcd. For  $\text{C}_{21}\text{H}_{29}\text{NOPS}$   $[\text{M}+\text{H}]^+$ : 374.1702, found: 374.1700.

### 2.3 Synthesis and general data of catalysts **L2**:

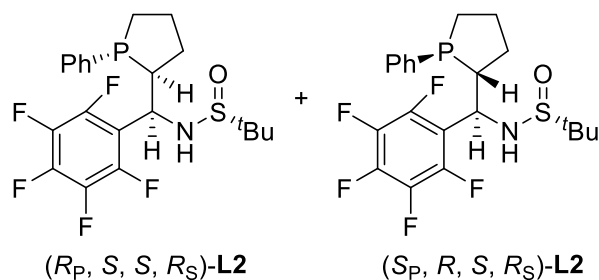

The general procedure was followed by using 1-phenylphospholane borane complex (534 mg, 3.0 mmol) dissolved by ether (4.0 mL) and the corresponding chiral sulfinyl imines (1.35 g, 4.50 mmol chiral sulfinyl imines in 5.0 mL anhydrous THF). After purification by column chromatography (PE/EtOAc = 2:1), (*R<sub>P</sub>*, *S*, *S*, *R<sub>S</sub>*)-**L2** borane complex (415 mg, 29%) and (*S<sub>P</sub>*, *R*, *S*, *R<sub>S</sub>*)-**L2** borane complex (530 mg, 37%) were obtained as white solids (*d.r.* = 1 : 1.28).

#### 2.3.1 Synthesis and general data of catalysts (*R<sub>P</sub>*, *S*, *S*, *R<sub>S</sub>*)-**L2**

The general procedure was followed by using (*R<sub>P</sub>*, *S*, *S*, *R<sub>S</sub>*)-**L2** borane complex (415 mg, 0.87 mmol) and DABCO (195 mg, 1.74 mmol). The resulting solution was stirred at 50 °C for 5 hours and then concentrated under vacuum. The residue was purified by silica gel flash chromatography (20% EtOAc in PE) to afford (*R<sub>P</sub>*, *S*, *S*, *R<sub>S</sub>*)-**L2** as colorless oily matter (254 mg, 63%).  $[\alpha]^{22}_{\text{D}} = -19.2$  (*c* 0.25, acetone);  $^1\text{H}$  NMR (400

MHz, CDCl<sub>3</sub>)  $\delta$  7.52 – 7.44 (m, 2H), 7.40 – 7.28 (m, 3H), 4.70 (td,  $J$  = 11.2, 7.2 Hz, 1H), 3.88 (d,  $J$  = 11.2 Hz, 1H), 2.90 – 2.78 (m, 1H), 2.10 – 1.98 (m, 3H), 1.83 – 1.72 (m, 2H), 1.35 – 1.28 (m, 1H), 1.19 (s, 9H); <sup>31</sup>P NMR (162 MHz, CDCl<sub>3</sub>)  $\delta$  -4.58 (t,  $J$  = 4.9 Hz); <sup>13</sup>C NMR (100 MHz, CDCl<sub>3</sub>)  $\delta$  140.75, 140.52, 131.28 (d,  $J$  = 17.2 Hz), 128.61 (d,  $J$  = 6.0 Hz), 128.35, 56.78, 56.50, 51.45 (d,  $J$  = 13.9 Hz), 32.94 (d,  $J$  = 1.7 Hz), 29.66, 28.24 (d,  $J$  = 3.3 Hz), 27.27 (d,  $J$  = 10.7 Hz), 22.35; HRMS (ESI) calcd. For C<sub>21</sub>H<sub>24</sub>F<sub>5</sub>NOPS [M+H]<sup>+</sup>: 464.1231, found: 464.1228.

### 2.3.2 Synthesis and general data of catalysts (*S<sub>P</sub>*, *R*, *S*, *R<sub>S</sub>*)-L2

The general procedure was followed by using (*S<sub>P</sub>*, *R*, *S*, *R<sub>S</sub>*)-L2 borane complex (530 mg, 1.11 mmol) and DABCO (249 mg, 2.22 mmol). The resulting solution was stirred at 50 °C for 5 hours and then concentrated under vacuum. The residue was purified by silica gel flash chromatography (25% EtOAc in PE) to afford (*S<sub>P</sub>*, *R*, *S*, *R<sub>S</sub>*)-L2 as a white solid (334 mg, 65%). [ $\alpha$ ]<sub>D</sub><sup>22</sup> = 67.6 (*c* 0.25, acetone); <sup>1</sup>H NMR (400 MHz, CDCl<sub>3</sub>)  $\delta$  7.26 – 7.21 (m, 3H), 7.15 – 7.10 (m, 2H), 4.61 (td,  $J$  = 11.2, 4.0 Hz, 1H), 3.79 (d,  $J$  = 11.2 Hz, 1H), 2.86 (tt,  $J$  = 11.6, 6.8 Hz, 1H), 2.38 – 2.25 (m, 1H), 2.21 – 2.10 (m, 1H), 2.09 – 2.01 (m, 2H), 1.98 – 1.89 (m, 1H), 1.70 – 1.60 (m, 1H), 1.21 (s, 9H); <sup>31</sup>P NMR (162 MHz, CDCl<sub>3</sub>)  $\delta$  -7.74 (t,  $J$  = 16.8 Hz); <sup>31</sup>P NMR (162 MHz, CDCl<sub>3</sub>)  $\delta$  -7.88 (t,  $J$  = 16.8 Hz); <sup>13</sup>C NMR (100 MHz, CDCl<sub>3</sub>)  $\delta$  139.52, 139.31, 131.09 (d,  $J$  = 18.0 Hz), 128.55, 128.46 (d,  $J$  = 6.3 Hz), 56.79, 56.66, 56.37, 51.36 (d,  $J$  = 11.9 Hz), 33.63 (d,  $J$  = 2.3 Hz), 28.29 (d,  $J$  = 3.2 Hz), 26.34 (d,  $J$  = 10.5 Hz), 22.43; HRMS (ESI) calcd. For C<sub>21</sub>H<sub>24</sub>F<sub>5</sub>NOPS [M+H]<sup>+</sup>: 464.1231, found: 464.1237.

### 2.4 Synthesis and general data of catalysts L3:

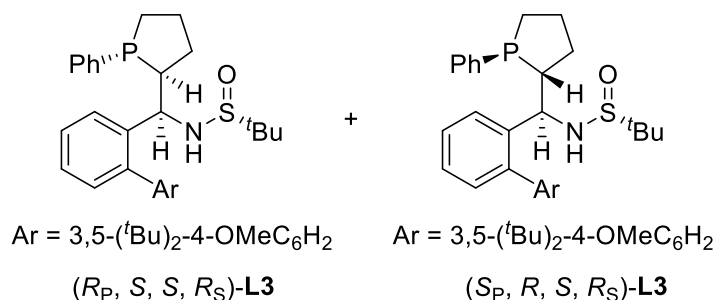

The general procedure was followed by using 1-phenylphospholane borane complex (534 mg, 3.0 mmol) dissolved by ether (4.0 mL) and the corresponding chiral sulfinyl imines (1.92 g, 4.50 mmol chiral sulfinyl imines in 5.0 mL anhydrous THF). After purification by column chromatography (PE/EtOAc = 2:1), (*R*<sub>P</sub>, *S*, *S*, *R*<sub>S</sub>)-**L3** borane complex (690 mg, 38%) and (*S*<sub>P</sub>, *R*, *S*, *R*<sub>S</sub>)-**L3** borane complex (545 mg, 30%) were obtained as white solids (*d.r.* = 1.27 : 1).

#### 2.4.1 Synthesis and general data of catalysts (*R*<sub>P</sub>, *S*, *S*, *R*<sub>S</sub>)-**L3**

The general procedure was followed by using (*R*<sub>P</sub>, *S*, *S*, *R*<sub>S</sub>)-**L3** borane complex (690 mg, 1.14 mmol) and Et<sub>2</sub>NH (2.0 mL). The resulting solution was stirred at 50 °C for 5 hours and then concentrated under vacuum. The residue was purified by silica gel flash chromatography (20% EtOAc in PE) to afford (*R*<sub>P</sub>, *S*, *S*, *R*<sub>S</sub>)-**L3** as a white solid (540 mg, 80%). [ $\alpha$ ]<sup>22</sup><sub>D</sub> = -20.0 (*c* 0.25, acetone); <sup>1</sup>H NMR (500 MHz, CDCl<sub>3</sub>)  $\delta$  7.66 (d, *J* = 7.0 Hz, 1H), 7.45 – 7.40 (m, 1H), 7.34 – 7.30 (m, 1H), 7.26 – 7.10 (m, 7H), 7.07 – 7.02 (m, 2H), 4.66 (s, 1H), 4.20 (s, 1H), 3.74 (s, 3H), 2.54 (dd, *J* = 9.0, 6.0 Hz, 1H), 2.08 – 2.02 (m, 1H), 1.89 – 1.84 (m, 1H), 1.77 – 1.66 (m, 1H), 1.58 – 1.51 (m, 2H), 1.43 (s, 18H), 1.23 (s, 9H); <sup>31</sup>P NMR (202 MHz, CDCl<sub>3</sub>)  $\delta$  -17.50; <sup>13</sup>C NMR (125 MHz, CDCl<sub>3</sub>)  $\delta$  158.43, 143.24, 141.88, 140.90, 140.74, 135.28, 130.55, 130.43, 128.30 (d, *J* = 5.4 Hz), 127.91, 127.68, 127.54, 127.02, 64.28, 56.70, 35.84, 33.55, 32.18, 28.01 (d, *J* = 3.4 Hz), 26.52 (d, *J* = 10.1 Hz), 22.75; HRMS (ESI) calcd. For C<sub>36</sub>H<sub>51</sub>NO<sub>2</sub>PS [M+H]<sup>+</sup>: 592.3373, found: 592.3375.

#### 2.4.2 Synthesis and general data of catalysts (*S*<sub>P</sub>, *R*, *S*, *R*<sub>S</sub>)-**L3**

The general procedure was followed by using (*S*<sub>P</sub>, *R*, *S*, *R*<sub>S</sub>)-**L3** borane complex (545 mg, 0.90 mmol) and Et<sub>2</sub>NH (2.0 mL). The resulting solution was stirred at 50 °C for 5 hours and then concentrated under vacuum. The residue was purified by silica gel flash chromatography (25% EtOAc in PE) to afford (*S*<sub>P</sub>, *R*, *S*, *R*<sub>S</sub>)-**L3** as a white solid (426 mg, 80%). [ $\alpha$ ]<sup>22</sup><sub>D</sub> = 23.6 (*c* 0.25, acetone); <sup>1</sup>H NMR (500 MHz, CDCl<sub>3</sub>)  $\delta$  7.53 – 7.49 (m, 1H), 7.36 (s, 2H), 7.35 – 7.16 (m, 7H), 7.16 – 7.11 (m, 2H), 4.81 – 4.72 (m,

1H), 3.77 (s, 3H), 3.73 (d,  $J = 8.0$  Hz, 1H), 2.83 – 2.75 (m, 1H), 2.03 – 1.94 (m, 2H), 1.84 (s, 1H), 1.76 – 1.61 (m, 2H), 1.49 (s, 18H), 1.17 (s, 9H);  $^{31}\text{P}$  NMR (202 MHz,  $\text{CDCl}_3$ )  $\delta$  -11.71;  $^{13}\text{C}$  NMR (125 MHz,  $\text{CDCl}_3$ )  $\delta$  158.39, 142.99, 142.30, 141.15, 140.96, 140.15 (d,  $J = 2.6$  Hz), 135.44, 130.94, 130.80, 130.38, 128.63, 128.22 (d,  $J = 5.5$  Hz), 127.55, 127.39, 127.11, 64.22, 59.76, 59.53, 56.38, 53.24, 53.12, 35.94, 32.54, 32.30, 29.73, 28.16 (d,  $J = 3.6$  Hz), 26.15, 26.06, 22.57; HRMS (ESI) calcd. For  $\text{C}_{36}\text{H}_{51}\text{NO}_2\text{PS}$   $[\text{M}+\text{H}]^+$ : 592.3373, found: 592.3373.

## 2.5 Synthesis and general data of catalysts **L4**:

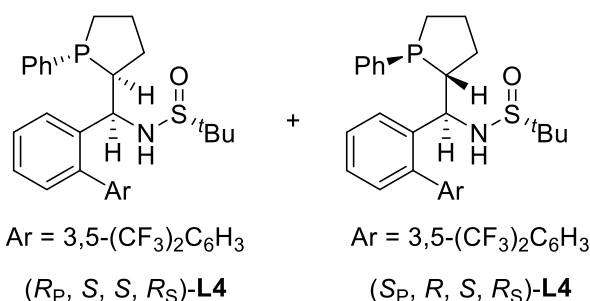

The general procedure was followed by using 1-phenylphospholane borane complex (534 mg, 3.0 mmol) dissolved by ether (4.0 mL) and the corresponding chiral sulfinyl imines (1.90 g, 4.50 mmol chiral sulfinyl imines in 5.0 mL anhydrous THF). After purification by column chromatography (PE/EtOAc = 2:1), ( $R_P$ , S, S,  $R_S$ )-**L4** borane complex (629 mg, 35%) and ( $S_P$ , R, S,  $R_S$ )-**L4** borane complex (539 mg, 30%) were obtained as white solids ( $d.r.$  = 1.17 : 1).

To prove the practical usefulness of the catalysts, the reaction was carried out on a gram scale. The general procedure was followed by using 1-phenylphospholane borane complex (1.78 g, 10.0 mmol) dissolved by ether (20.0 mL) and the corresponding chiral sulfinyl imines (6.33 g, 4.50 mmol chiral sulfinyl imines in 10.0 mL anhydrous THF). After purification by column chromatography (PE/EtOAc = 2:1), ( $R_P$ , S, S,  $R_S$ )-**L4** borane complex (2.15 g, 36%) and ( $S_P$ , R, S,  $R_S$ )-**L4** borane complex (1.79 g, 30%) were obtained as white solids ( $d.r.$  = 1.2 : 1).

### 2.5.1 Synthesis and general data of catalysts ( $R_P$ , S, S, $R_S$ )-**L4**

The general procedure was followed by using (*R<sub>P</sub>*, *S*, *S*, *R<sub>S</sub>*)-**L4** borane complex (629 mg, 1.05 mmol) and Et<sub>2</sub>NH (2.0 mL). The resulting solution was stirred at 50 °C for 5 hours and then concentrated under vacuum. The residue was purified by silica gel flash chromatography (20% EtOAc in PE) to afford (*R<sub>P</sub>*, *S*, *S*, *R<sub>S</sub>*)-**L4** as a white solid (492 mg, 80%). [ $\alpha$ ]<sup>22</sup><sub>D</sub> = -45.6 (*c* 0.25, acetone); <sup>1</sup>H NMR (400 MHz, CDCl<sub>3</sub>)  $\delta$  7.82 (s, 1H), 7.76 (s, 2H), 7.67 (d, *J* = 7.6 Hz, 1H), 7.41 (t, *J* = 7.2 Hz, 1H), 7.27 (t, *J* = 7.2 Hz, 1H), 7.21 – 7.13 (m, 6H), 7.08 (d, *J* = 7.6 Hz, 1H), 4.22 – 4.03 (m, 2H), 2.57 (s, 1H), 1.97 – 1.86 (m, 1H), 1.79 – 1.66 (m, 2H), 1.63 – 1.46 (m, 2H), 1.10 (s, 9H); <sup>31</sup>P NMR (202 MHz, CDCl<sub>3</sub>)  $\delta$  -13.78; <sup>19</sup>F NMR (282 MHz, CDCl<sub>3</sub>)  $\delta$  -62.71; <sup>13</sup>C NMR (100 MHz, CDCl<sub>3</sub>)  $\delta$  143.32, 140.50, 140.30, 140.15, 140.09, 138.29, 131.73, 131.39, 131.06, 130.90, 129.93 (d, *J* = 8.7 Hz), 129.41, 128.49 (d, *J* = 5.8 Hz), 128.02, 127.72, 124.65, 121.94, 121.36 – 120.97 (m), 56.70, 33.35, 28.01 (d, *J* = 3.4 Hz), 26.88, 26.77, 22.56; HRMS (ESI) calcd. For C<sub>29</sub>H<sub>31</sub>F<sub>6</sub>NOPS [M+H]<sup>+</sup>: 586.1763, found: 586.1771.

### 2.5.2 Synthesis and general data of catalysts (*S<sub>P</sub>*, *R*, *S*, *R<sub>S</sub>*)-**L4**

The general procedure was followed by using (*S<sub>P</sub>*, *R*, *S*, *R<sub>S</sub>*)-**L4** borane complex (539 mg, 0.90 mmol) and Et<sub>2</sub>NH (2.0 mL). The resulting solution was stirred at 50 °C for 5 hours and then concentrated under vacuum. The residue was purified by silica gel flash chromatography (25% EtOAc in PE) to afford (*S<sub>P</sub>*, *R*, *S*, *R<sub>S</sub>*)-**L4** as a white solid (411 mg, 78%). [ $\alpha$ ]<sup>22</sup><sub>D</sub> = 5.1 (*c* 0.25, acetone); <sup>1</sup>H NMR (400 MHz, CDCl<sub>3</sub>)  $\delta$  8.00 (s, 2H), 7.81 (s, 1H), 7.35 – 7.29 (m, 1H), 7.29 – 7.20 (m, 2H), 7.13 – 7.05 (m, 4H), 6.97 – 6.91 (m, 2H), 4.22 – 4.13 (m, 1H), 3.53 (d, *J* = 8.4 Hz, 1H), 2.68 – 2.57 (m, 1H), 2.08 – 1.98 (m, 2H), 1.93 – 1.81 (m, 2H), 1.74 – 1.52 (m, 1H), 1.06 (s, 9H); <sup>31</sup>P NMR (202 MHz, CDCl<sub>3</sub>)  $\delta$  -11.08; <sup>19</sup>F NMR (282 MHz, CDCl<sub>3</sub>)  $\delta$  -62.62; <sup>13</sup>C NMR (100 MHz, CDCl<sub>3</sub>)  $\delta$  143.42, 140.63 (d, *J* = 2.1 Hz), 140.29, 140.07, 138.46, 131.70, 131.37, 131.20, 131.02, 130.84, 130.70, 129.98, 129.17, 128.26 (d, *J* = 6.0 Hz), 127.97, 127.66, 127.53, 127.35, 124.82, 122.11, 121.10 – 120.73 (m), 119.40, 61.17, 60.80, 56.48, 54.36, 54.23, 33.32, 28.50 (d, *J* = 3.4 Hz), 25.82, 25.71, 22.44; HRMS (ESI) calcd. For C<sub>29</sub>H<sub>31</sub>F<sub>6</sub>NOPS [M+H]<sup>+</sup>: 586.1763, found: 586.1767.

## 2.6 Synthesis and general data of catalysts **L5**:

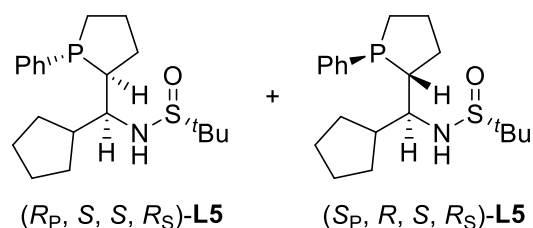

The general procedure was followed by using 1-phenylphospholane borane complex (1.78 g, 10.0 mmol) dissolved by ether (20.0 mL) and the corresponding chiral sulfinyl imines (3.00 g, 15.0 mmol) in 5.0 mL anhydrous THF). After purification by column chromatography (PE/EtOAc = 2:1),  $(R_P, S, S, R_S)\text{-L5}$  borane complex (1.15 g, 30%) and  $(S_P, R, S, R_S)\text{-L5}$  borane complex (1.30 g, 34%) were obtained as white solids (*d.r.* = 1 : 1.13).

### 2.6.1 Synthesis and general data of catalysts $(R_P, S, S, R_S)\text{-L5}$

The general procedure was followed by using  $(R_P, S, S, R_S)\text{-L5}$  borane complex (380 mg, 1.0 mmol) and Et<sub>2</sub>NH (2.0 mL). The resulting solution was stirred at 50 °C for 5 hours and then concentrated under vacuum. The residue was purified by silica gel flash chromatography (25% EtOAc in PE) to afford  $(R_P, S, S, R_S)\text{-L5}$  as a white solid (307 mg, 84%).  $[\alpha]^{22}_D = -44.2$  (*c* 1.0, acetone); <sup>1</sup>H NMR (400 MHz, CDCl<sub>3</sub>) δ 7.48 – 7.41 (m, 2H), 7.35 – 7.24 (m, 3H), 3.67 (dd, *J* = 8.0, 2.0 Hz, 1H), 3.28 – 3.17 (m, 1H), 2.65 (ddd, *J* = 13.0, 8.4, 2.1 Hz, 1H), 2.19 – 2.04 (m, 3H), 2.04 – 1.99 (m, 1H), 1.97 – 1.86 (m, 1H), 1.77 – 1.33 (m, 10H), 1.26 (s, 9H); <sup>31</sup>P NMR (162 MHz, CDCl<sub>3</sub>) δ -20.05 (s); <sup>13</sup>C NMR (100 MHz, CDCl<sub>3</sub>) δ 141.28, 141.07, 131.55, 131.38, 128.43 (d, *J* = 5.9 Hz), 127.89, 64.24, 64.09, 56.64, 51.00 (d, *J* = 12.2 Hz), 47.98 (d, *J* = 7.9 Hz), 33.61, 31.05, 30.66, 28.26 (d, *J* = 4.0 Hz), 27.62, 27.52, 25.38, 25.26, 23.24. HRMS (ESI) calcd. For C<sub>20</sub>H<sub>33</sub>NOPS [M+H]<sup>+</sup>: 366.2010, found: 366.2002.

### 2.6.2 Synthesis and general data of catalysts $(S_P, R, S, R_S)\text{-L5}$

The general procedure was followed by using  $(S_P, R, S, R_S)\text{-L5}$  borane complex (1.30 g, 3.40 mmol) and Et<sub>2</sub>NH (4.0 mL). The resulting solution was stirred at 50 °C for 5 hours and then concentrated under vacuum. The residue was purified by silica gel

flash chromatography (25% EtOAc in PE) to afford (*S<sub>P</sub>*, *R*, *S*, *R<sub>S</sub>*)-**L5** as a white solid (1.10 g, 88%).  $[\alpha]^{22}_{\text{D}} = -2.9$  (*c* 1.0, acetone);  $^1\text{H}$  NMR (500 MHz,  $\text{CDCl}_3$ )  $\delta$  7.41 (dd,  $J = 10.8, 4.0$  Hz, 2H), 7.34 – 7.29 (m, 2H), 7.26 – 7.21 (m, 1H), 3.59 – 3.50 (m, 1H), 3.27 (d,  $J = 6.1$  Hz, 1H), 2.54 (td,  $J = 12.7, 6.3$  Hz, 1H), 2.25 – 2.15 (m, 1H), 2.13 – 2.00 (m, 3H), 1.84 – 1.75 (m, 2H), 1.74 – 1.66 (m, 3H), 1.63 – 1.57 (m, 1H), 1.57 – 1.46 (m, 3H), 1.46 – 1.38 (m, 1H), 1.34 (ddd,  $J = 17.1, 8.9, 3.7$  Hz, 1H), 1.25 (s, 9H);  $^{31}\text{P}$  NMR (202 MHz,  $\text{CDCl}_3$ )  $\delta$  -9.95;  $^{13}\text{C}$  NMR (126 MHz,  $\text{CDCl}_3$ )  $\delta$  141.92 (d,  $J = 22.8$  Hz), 130.76 (d,  $J = 16.5$  Hz), 128.37 (d,  $J = 5.4$  Hz), 127.59, 63.62, 63.42, 56.53, 51.49 (d,  $J = 13.3$  Hz), 45.06 (d,  $J = 10.0$  Hz), 30.53 (d,  $J = 10.5$  Hz), 29.35, 28.44 (d,  $J = 3.8$  Hz), 26.48 (d,  $J = 11.4$  Hz), 25.43 (s), 25.29, 23.06 (d,  $J = 0.9$  Hz). HRMS (ESI) calcd. For  $\text{C}_{20}\text{H}_{33}\text{NOPS}$   $[\text{M}+\text{H}]^+$ : 366.2015, found: 366.2006.



## Optimization of reaction conditions

3.1 Table S-1: Reaction conditions screening of pyrrolidine-2,5-diones with Allenyl esters.<sup>a</sup>

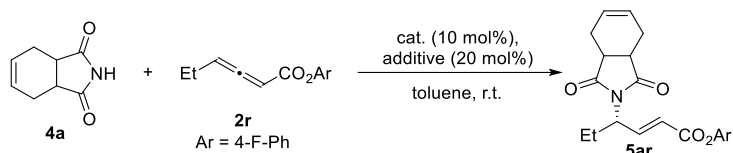

| Entry              | Catalyst                                                                           | Additive          | T (h) | <i>E/Z</i> <sup>b</sup> | <i>ee</i> (%) <sup>c</sup> |
|--------------------|------------------------------------------------------------------------------------|-------------------|-------|-------------------------|----------------------------|
| 1                  | <b>P9</b>                                                                          | -                 | 8     | 4:1                     | 60                         |
| 2                  | ( <i>R</i> <sub>P</sub> , <i>S</i> , <i>S</i> , <i>R</i> <sub>S</sub> )- <b>L1</b> | -                 | 4     | 2:1                     | 25                         |
| 3                  | ( <i>R</i> <sub>P</sub> , <i>S</i> , <i>S</i> , <i>R</i> <sub>S</sub> )- <b>L2</b> | -                 | 4     | 2:1                     | 14                         |
| 4                  | ( <i>S</i> <sub>P</sub> , <i>R</i> , <i>S</i> , <i>R</i> <sub>S</sub> )- <b>L1</b> | -                 | 4     | 6:1                     | 48                         |
| 5                  | ( <i>S</i> <sub>P</sub> , <i>R</i> , <i>S</i> , <i>R</i> <sub>S</sub> )- <b>L2</b> | -                 | 4     | 6:1                     | 88                         |
| 6                  | ( <i>S</i> <sub>P</sub> , <i>R</i> , <i>S</i> , <i>R</i> <sub>S</sub> )- <b>L2</b> | PhOH              | 6     | 8:1                     | 88                         |
| 7                  | ( <i>S</i> <sub>P</sub> , <i>R</i> , <i>S</i> , <i>R</i> <sub>S</sub> )- <b>L2</b> | AcOH              | 12    | 4:1                     | 88                         |
| 8                  | ( <i>S</i> <sub>P</sub> , <i>R</i> , <i>S</i> , <i>R</i> <sub>S</sub> )- <b>L2</b> | 2,6-dibromophenol | 6     | 9:1                     | 89                         |
| 9 <sup>d</sup>     | ( <i>S</i> <sub>P</sub> , <i>R</i> , <i>S</i> , <i>R</i> <sub>S</sub> )- <b>L2</b> | 2,6-dibromophenol | 12    | 10:1                    | 84                         |
| 10 <sup>e</sup>    | ( <i>S</i> <sub>P</sub> , <i>R</i> , <i>S</i> , <i>R</i> <sub>S</sub> )- <b>L2</b> | 2,6-dibromophenol | 12    | 10:1                    | 89                         |
| 11 <sup>f</sup>    | ( <i>S</i> <sub>P</sub> , <i>R</i> , <i>S</i> , <i>R</i> <sub>S</sub> )- <b>L2</b> | 2,6-dibromophenol | 12    | -                       | -                          |
| 12 <sup>g, j</sup> | ( <i>S</i> <sub>P</sub> , <i>R</i> , <i>S</i> , <i>R</i> <sub>S</sub> )- <b>L2</b> | 2,6-dibromophenol | 12    | 10:1                    | 90                         |
| 13 <sup>h</sup>    | ( <i>S</i> <sub>P</sub> , <i>R</i> , <i>S</i> , <i>R</i> <sub>S</sub> )- <b>L2</b> | 2,6-dibromophenol | 12    | 9:1                     | 92                         |
| 14 <sup>i</sup>    | ( <i>S</i> <sub>P</sub> , <i>R</i> , <i>S</i> , <i>R</i> <sub>S</sub> )- <b>L2</b> | 2,6-dibromophenol | 12    | 6:1                     | 92                         |
| 15 <sup>h</sup>    | ( <i>S</i> , <i>S</i> )-DIOP                                                       | 2,6-dibromophenol | 18    | 4:1                     | 11                         |
| 16                 | ( <i>R</i> , <i>R</i> )-Et-BPE                                                     | 2,6-dibromophenol | 18    | 3:1                     | 31                         |
| 17 <sup>h</sup>    | ( <i>S</i> )-SITCP                                                                 | 2,6-dibromophenol | 12    | 3:5                     | 22                         |

<sup>a</sup>Reaction conditions: **4a** (0.10 mmol), **2r** (0.20 mmol), and the catalyst (0.01 mmol) in toluene (1.5 mL) at room temperature. <sup>b</sup>Determined by <sup>1</sup>H NMR analysis of the crude mixture. <sup>c</sup>Determined by HPLC analysis on a chiral stationary phase. <sup>d</sup>In dichloromethane. <sup>e</sup>In Et<sub>2</sub>O. <sup>f</sup>In 1,4-dioxane. <sup>g</sup>In xylene. <sup>h</sup>At 0 °C. <sup>i</sup>At -10 °C. <sup>j</sup>60% conversion.

### 3.2 Table S-2: Allenyl esters optimization.<sup>[4]</sup>

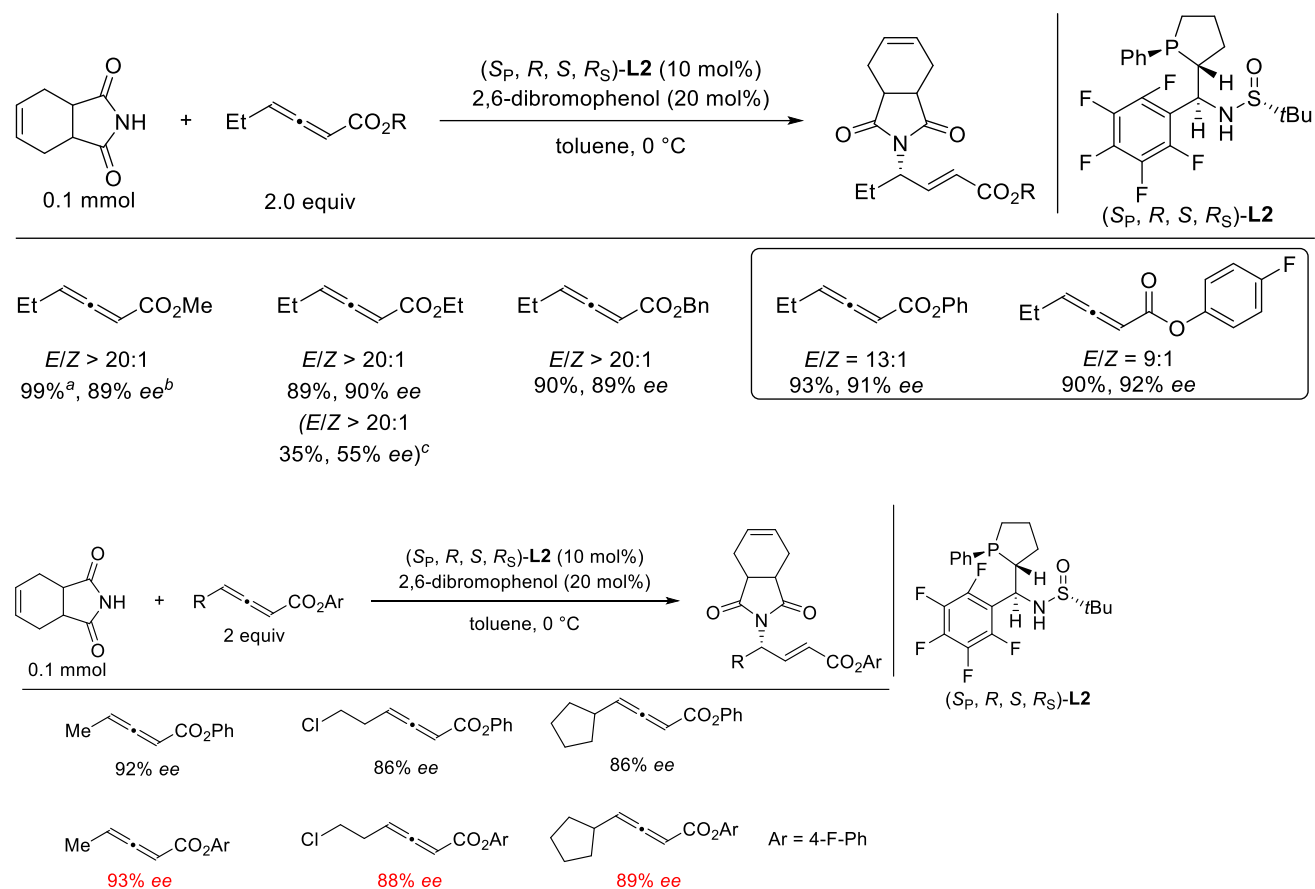

<sup>a</sup>isolated yield. <sup>b</sup>Determined by HPLC analysis on a chiral stationary phase. <sup>c</sup>Performed with catalyst

**P8** (0.01 mmol) in toluene (1.5 mL) at room temperature.

### 3.3 Table S-3: Reaction conditions screening of TsNH<sub>2</sub> with Allenyl esters.<sup>a</sup>

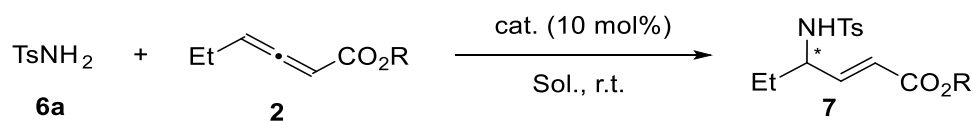

| Entry | Catalyst                                            | Solvent           | R  | E/Z <sup>b</sup> | Yield (%) <sup>b</sup> | ee (%) <sup>c</sup> |
|-------|-----------------------------------------------------|-------------------|----|------------------|------------------------|---------------------|
| 1     | (S <sub>P</sub> , R, S, R <sub>S</sub> )- <b>L1</b> | DCE               | Et | > 20:1           | 41                     | 0                   |
| 2     | (S <sub>P</sub> , R, S, R <sub>S</sub> )- <b>L3</b> | DCE               | Et | > 20:1           | 22                     | 8                   |
| 3     | (S <sub>P</sub> , R, S, R <sub>S</sub> )- <b>L4</b> | DCE               | Et | > 20:1           | 28                     | 50                  |
| 4     | (S <sub>P</sub> , R, S, R <sub>S</sub> )- <b>L5</b> | DCE               | Et | > 20:1           | 59                     | 60                  |
| 5     | (S <sub>P</sub> , R, S, R <sub>S</sub> )- <b>L5</b> | Toluene           | Et | > 20:1           | 36                     | 65                  |
| 6     | (S <sub>P</sub> , R, S, R <sub>S</sub> )- <b>L5</b> | Et <sub>2</sub> O | Et | > 20:1           | 34                     | 70                  |

|                 |                                                     |                   |                 |        |    |    |
|-----------------|-----------------------------------------------------|-------------------|-----------------|--------|----|----|
| 7               | (S <sub>P</sub> , R, S, R <sub>S</sub> )- <b>L5</b> | PhCF <sub>3</sub> | Et              | > 20:1 | 40 | 65 |
| 8               | (S <sub>P</sub> , R, S, R <sub>S</sub> )- <b>L5</b> | DCM               | Et              | > 20:1 | 55 | 54 |
| 9               | (S <sub>P</sub> , R, S, R <sub>S</sub> )- <b>L5</b> | MeCN              | Et              | > 20:1 | 13 | 66 |
| 10              | (S <sub>P</sub> , R, S, R <sub>S</sub> )- <b>L5</b> | Et <sub>2</sub> O | Bn              | > 20:1 | 28 | 83 |
| 11              | (S <sub>P</sub> , R, S, R <sub>S</sub> )- <b>L5</b> | Et <sub>2</sub> O | Me              | > 20:1 | 34 | 87 |
| 12              | (S <sub>P</sub> , R, S, R <sub>S</sub> )- <b>L5</b> | Et <sub>2</sub> O | <sup>t</sup> Bu | > 20:1 | 28 | 78 |
| 13 <sup>d</sup> | (S <sub>P</sub> , R, S, R <sub>S</sub> )- <b>L5</b> | Et <sub>2</sub> O | Me              | > 20:1 | 45 | 87 |
| 14 <sup>e</sup> | (S <sub>P</sub> , R, S, R <sub>S</sub> )- <b>L5</b> | Et <sub>2</sub> O | Me              | > 20:1 | 58 | 87 |
| 15              | <b>P8</b>                                           | Et <sub>2</sub> O | Me              | > 20:1 | 30 | 86 |

<sup>a</sup>Reaction conditions: **6a** (0.10 mmol), **2** (0.20 mmol), and the catalyst (0.01 mmol) in solvent (1.5 mL) at room temperature. <sup>b</sup>NMR yield with the use of CH<sub>2</sub>Br<sub>2</sub> as internal standard. <sup>c</sup>Determined by HPLC analysis on a chiral stationary phase. <sup>d</sup>Performed with **L5** (0.15 equiv.). <sup>e</sup>Performed with **L5** (0.20 equiv.). DCM = Dichloromethane, DCE = 1,2-Dichloroethane.

3.4 Table S-4: Reaction conditions screening of (BocNH)<sub>2</sub> with Allenyl esters.<sup>a</sup>

Reaction scheme: A chiral diamine (8) with two Boc-protected NH groups reacts with an allenyl ester (2) (Et-CH=C=CH-CO<sub>2</sub>R) in the presence of a catalyst (10 mol%) in a solvent at room temperature to form a product (9) where the allenyl ester has been converted to an allyl ester, with the Boc-protected nitrogen now bonded to the allyl group.

| Entry | Catalyst                                            | Solvent           | R  | <i>E/Z</i> <sup>b</sup> | Yield (%) <sup>b</sup> | <i>ee</i> (%) <sup>c</sup> |
|-------|-----------------------------------------------------|-------------------|----|-------------------------|------------------------|----------------------------|
| 1     | (S <sub>P</sub> , R, S, R <sub>S</sub> )- <b>L1</b> | DCE               | Et | > 20:1                  | 18                     | 65                         |
| 2     | (S <sub>P</sub> , R, S, R <sub>S</sub> )- <b>L3</b> | DCE               | Et | > 20:1                  | 51                     | 70                         |
| 3     | (S <sub>P</sub> , R, S, R <sub>S</sub> )- <b>L4</b> | DCE               | Et | > 20:1                  | 60                     | 77                         |
| 4     | (S <sub>P</sub> , R, S, R <sub>S</sub> )- <b>L5</b> | DCE               | Et | > 20:1                  | trace                  | -                          |
| 5     | (S <sub>P</sub> , R, S, R <sub>S</sub> )- <b>L4</b> | DCE               | Bn | > 20:1                  | 80                     | 80                         |
| 6     | (S <sub>P</sub> , R, S, R <sub>S</sub> )- <b>L4</b> | DCE               | Me | > 20:1                  | 76                     | 75                         |
| 7     | (S <sub>P</sub> , R, S, R <sub>S</sub> )- <b>L4</b> | DCE               | Bu | > 20:1                  | 62                     | 63                         |
| 8     | (S <sub>P</sub> , R, S, R <sub>S</sub> )- <b>L4</b> | Toluene           | Bn | > 20:1                  | 36                     | 80                         |
| 9     | (S <sub>P</sub> , R, S, R <sub>S</sub> )- <b>L4</b> | Et <sub>2</sub> O | Bn | > 20:1                  | trace                  | -                          |
| 10    | (S <sub>P</sub> , R, S, R <sub>S</sub> )- <b>L4</b> | CHCl <sub>3</sub> | Bn | > 20:1                  | 58                     | 82                         |
| 11    | (S <sub>P</sub> , R, S, R <sub>S</sub> )- <b>L4</b> | DCM               | Bn | > 20:1                  | 88                     | 83                         |

|    |                                                                                  |      |    |        |       |    |
|----|----------------------------------------------------------------------------------|------|----|--------|-------|----|
| 12 | ( <i>S<sub>P</sub></i> , <i>R</i> , <i>S</i> , <i>R<sub>S</sub></i> )- <b>L4</b> | MeCN | Bn | > 20:1 | Trace | -  |
| 13 | <b>P8</b>                                                                        | DCM  | Bn | > 20:1 | 38    | 21 |

<sup>a</sup>Reaction conditions: **8** (0.10 mmol), **2** (0.20 mmol), and the catalyst (0.01 mmol) in solvent (1.5 mL) at room temperature. <sup>b</sup>NMR yield with the use of CH<sub>2</sub>Br<sub>2</sub> as internal standard. <sup>c</sup>Determined by HPLC analysis on a chiral stationary phase. DCM = Dichloromethane, DCE = 1,2-Dichloroethane.

3.5 Table S-5: Reaction conditions screening of pyrazole with Allenyl esters. <sup>a</sup>

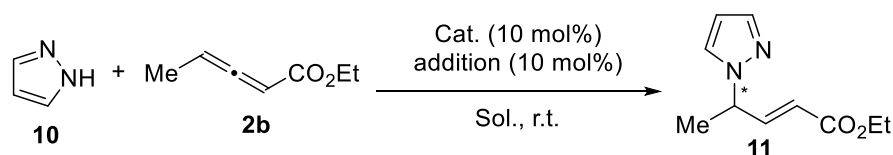

| Entry           | Catalyst                                                                         | Solvent           | Additive                        | <i>E/Z</i> <sup>b</sup> | Yield (%) <sup>b</sup> | <i>ee</i> (%) <sup>c</sup> |
|-----------------|----------------------------------------------------------------------------------|-------------------|---------------------------------|-------------------------|------------------------|----------------------------|
| 1               | ( <i>S<sub>P</sub></i> , <i>R</i> , <i>S</i> , <i>R<sub>S</sub></i> )- <b>L1</b> | Toluene           | -                               | > 20:1                  | 87                     | 58                         |
| 2               | ( <i>S<sub>P</sub></i> , <i>R</i> , <i>S</i> , <i>R<sub>S</sub></i> )- <b>L2</b> | Toluene           | -                               | > 20:1                  | 84                     | 64                         |
| 3               | ( <i>R<sub>P</sub></i> , <i>S</i> , <i>S</i> , <i>R<sub>S</sub></i> )- <b>L4</b> | Toluene           | -                               | > 20:1                  | 72                     | -22                        |
| 4               | ( <i>S<sub>P</sub></i> , <i>R</i> , <i>S</i> , <i>R<sub>S</sub></i> )- <b>L4</b> | Toluene           | -                               | > 20:1                  | 79                     | 84                         |
| 5               | ( <i>R<sub>P</sub></i> , <i>S</i> , <i>S</i> , <i>R<sub>S</sub></i> )- <b>L5</b> | Toluene           | -                               | > 20:1                  | 79                     | -44                        |
| 6               | ( <i>S<sub>P</sub></i> , <i>R</i> , <i>S</i> , <i>R<sub>S</sub></i> )- <b>L5</b> | Toluene           | -                               | > 20:1                  | 87                     | 57                         |
| 7               | ( <i>S<sub>P</sub></i> , <i>R</i> , <i>S</i> , <i>R<sub>S</sub></i> )- <b>L4</b> | Et <sub>2</sub> O | -                               | > 20:1                  | 69                     | 85                         |
| 8               | ( <i>S<sub>P</sub></i> , <i>R</i> , <i>S</i> , <i>R<sub>S</sub></i> )- <b>L4</b> | DCE               | -                               | > 20:1                  | 80                     | 85                         |
| 9               | ( <i>S<sub>P</sub></i> , <i>R</i> , <i>S</i> , <i>R<sub>S</sub></i> )- <b>L4</b> | DCM               | -                               | > 20:1                  | 82                     | 83                         |
| 10              | ( <i>S<sub>P</sub></i> , <i>R</i> , <i>S</i> , <i>R<sub>S</sub></i> )- <b>L4</b> | THF               | -                               | > 20:1                  | 70                     | 88                         |
| 11              | ( <i>S<sub>P</sub></i> , <i>R</i> , <i>S</i> , <i>R<sub>S</sub></i> )- <b>L4</b> | Dioxane           | -                               | > 20:1                  | 83                     | 88                         |
| 12              | ( <i>S<sub>P</sub></i> , <i>R</i> , <i>S</i> , <i>R<sub>S</sub></i> )- <b>L4</b> | Dioxane           | PhOH                            | > 20:1                  | 79                     | 85                         |
| 13              | ( <i>S<sub>P</sub></i> , <i>R</i> , <i>S</i> , <i>R<sub>S</sub></i> )- <b>L4</b> | Dioxane           | ( <i>S</i> )-BINOL              | > 20:1                  | 85                     | 84                         |
| 14              | ( <i>S<sub>P</sub></i> , <i>R</i> , <i>S</i> , <i>R<sub>S</sub></i> )- <b>L4</b> | Dioxane           | ( <i>R</i> )-BINOL              | > 20:1                  | 79                     | 83                         |
| 15              | ( <i>S<sub>P</sub></i> , <i>R</i> , <i>S</i> , <i>R<sub>S</sub></i> )- <b>L4</b> | Dioxane           | KH <sub>2</sub> PO <sub>4</sub> | > 20:1                  | 77                     | 85                         |
| 16              | ( <i>S<sub>P</sub></i> , <i>R</i> , <i>S</i> , <i>R<sub>S</sub></i> )- <b>L4</b> | Dioxane           | CH <sub>3</sub> COOH            | > 20:1                  | 65(66 <sup>d</sup> )   | 95                         |
| 17 <sup>e</sup> | ( <i>S<sub>P</sub></i> , <i>R</i> , <i>S</i> , <i>R<sub>S</sub></i> )- <b>L4</b> | Dioxane           | CH <sub>3</sub> COOH            | > 20:1                  | 76 <sup>d</sup>        | 95                         |
| 18 <sup>f</sup> | ( <i>S<sub>P</sub></i> , <i>R</i> , <i>S</i> , <i>R<sub>S</sub></i> )- <b>L4</b> | Dioxane           | CH <sub>3</sub> COOH            | > 20:1                  | 85 <sup>d</sup>        | 95                         |

<sup>a</sup>Reaction conditions: **10** (0.10 mmol), **2b** (0.20 mmol), and the catalyst (0.01 mmol) in solvent (1.5 mL) at room temperature. <sup>b</sup>NMR yield with the use of CH<sub>2</sub>Br<sub>2</sub> as internal standard. <sup>c</sup>Determined by HPLC analysis on a chiral stationary phase. <sup>d</sup>Yield of isolated product. <sup>e</sup>Performed with **2b** (0.25 mmol). <sup>f</sup>Performed with **2b** (0.30 mmol). DCM = Dichloromethane, DCE = 1,2-Dichloroethane.

### 3. General procedure for the cascade reaction of 2-oxazolidones:

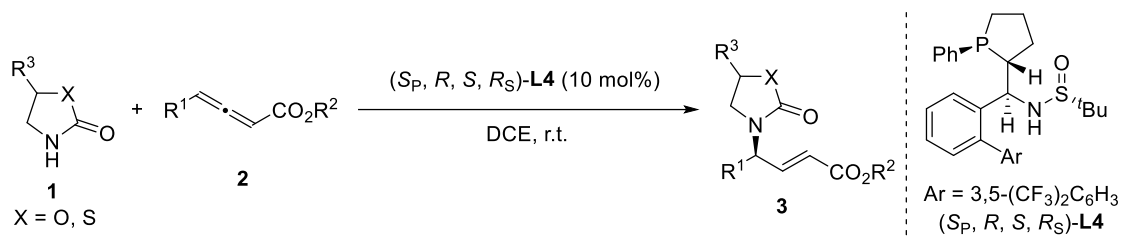

To a flame-dried glass tube with a magnetic stirring bar were added 2-oxazolidone **1a** (8.7 mg, 0.10 mmol) and (S<sub>P</sub>, R, S, R<sub>S</sub>)-**L4** (5.9 mg, 0.01 mmol), followed by the addition of dry 1,2-Dichloroethane (1.5 mL).<sup>[5]</sup> Then the allenoate **2a** (28.0 mg, 0.20 mmol) was slowly added via syringe at room temperature under inert atmosphere. The reaction mixture was stirred for 24 h, and TLC show that the reaction was completed. Then 1,2-Dichloroethane was removed under reduced pressure. The residue was purified by column chromatography on silica gel (petroleum ether/ethyl acetate = 2:1) to afford **3aa** (20.4 mg, 90% yield).

#### 4.1 Synthesis of ethyl (*R*, *E*)-4-(2-oxooxazolidin-3-yl)pent-2-enoate (**3ab**).

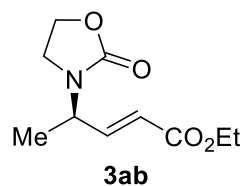

The general procedure was followed using **1a** (8.7 mg, 0.10 mmol) and **2b** (25.2 mg, 0.20 mmol). After purification by column chromatography (PE/EtOAc = 2:1), **3ab** (19.6 mg, 91%) was obtained as a colorless oil.  $[\alpha]_D^{22} = -11.6$  (*c* 0.10, acetone); <sup>1</sup>H NMR (400 MHz, CDCl<sub>3</sub>) δ 6.83 (dd, *J* = 15.6, 4.8 Hz, 1H), 5.90 (dd, *J* = 16.0, 0.8 Hz, 1H), 4.71 – 4.65 (m, 1H), 4.34 (t, *J* = 8.4 Hz, 2H), 4.18 (q, *J* = 7.2 Hz, 2H), 3.58 – 3.35 (m, 2H), 1.34 (d, *J* = 7.2 Hz, 3H), 1.27 (t, *J* = 7.2 Hz, 3H); <sup>13</sup>C NMR (100 MHz,

CDCl<sub>3</sub>)  $\delta$  165.88, 157.72, 145.54, 122.55, 62.08, 60.71, 49.05, 40.28, 16.49, 14.20;  
Enantiomeric excess: 98%, determined by HPLC (Chiralpak IF hexane/*i*-PrOH = 70/30;  
flow rate 0.6 ml/min; 25 °C; 254 nm), first peak: *t*<sub>R</sub> = 19.9 min, second peak: *t*<sub>R</sub> = 20.9  
min. HRMS (ESI) calcd. for C<sub>10</sub>H<sub>15</sub>NNaO<sub>4</sub> [M+Na]<sup>+</sup>: 236.0893, found: 236.0890.

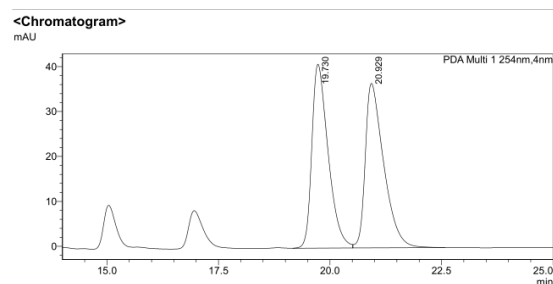

<Peak Table>  
PDA Ch1 254nm

| Peak# | Ret. Time | Area    | Area%   | Height | Height% |
|-------|-----------|---------|---------|--------|---------|
| 1     | 19.730    | 1040798 | 49.666  | 40923  | 52.775  |
| 2     | 20.929    | 1054782 | 50.334  | 36620  | 47.225  |
| Total |           | 2095580 | 100.000 | 77543  | 100.000 |

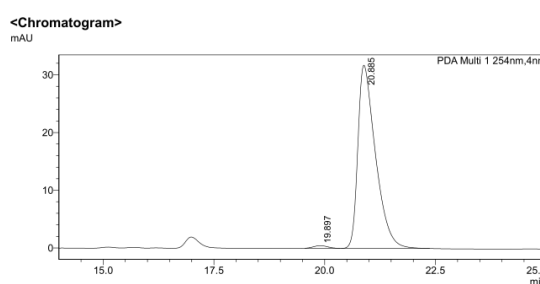

<Peak Table>  
PDA Ch1 254nm

| Peak# | Ret. Time | Area   | Area%   | Height | Height% |
|-------|-----------|--------|---------|--------|---------|
| 1     | 19.897    | 9986   | 1.123   | 458    | 1.422   |
| 2     | 20.885    | 879541 | 98.877  | 31744  | 98.578  |
| Total |           | 889527 | 100.000 | 32201  | 100.000 |

## 4.2 Synthesis of ethyl (*R*, *E*)-4-(2-oxooxazolidin-3-yl)hept-2-enoate (**3ac**).

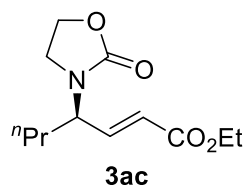

The general procedure was followed using **1a** (8.7 mg, 0.10 mmol) and **2c** (30.8 mg, 0.20 mmol). After purification by column chromatography (PE/EtOAc = 2:1), **3ac** (21.0 mg, 87%) was obtained as a colorless oil.  $[\alpha]_D^{22} = -0.2$  (*c* 0.25, acetone); <sup>1</sup>H NMR (400 MHz, CDCl<sub>3</sub>)  $\delta$  6.79 (dd, *J* = 16.0, 6.0 Hz, 1H), 5.91 (dd, *J* = 16.0, 1.6 Hz, 1H), 4.53 - 4.44 (m, *J* = 14.0, 1H), 4.34 (t, *J* = 8.0 Hz, 2H), 4.18 (q, *J* = 7.2 Hz, 2H), 3.52 - 3.41 (m, 2H), 1.65 - 1.58 (m, 2H), 1.38 - 1.31 (m, 2H), 1.27 (t, *J* = 7.2 Hz, 3H), 0.94 (t, *J* = 7.2 Hz, 3H); <sup>13</sup>C NMR (100 MHz, CDCl<sub>3</sub>)  $\delta$  165.92, 158.01, 144.30, 123.01, 62.08, 60.67, 53.39, 40.23, 33.06, 19.18, 14.19, 13.58; Enantiomeric excess: 95%, determined by HPLC (Chiralpak IF hexane/*i*-PrOH = 75/25; flow rate 0.5 ml/min; 25 °C; 190 nm), first peak: *t*<sub>R</sub> = 21.5 min, second peak: *t*<sub>R</sub> = 23.7 min. HRMS (ESI) calcd. for C<sub>12</sub>H<sub>19</sub>NNaO<sub>4</sub> [M+Na]<sup>+</sup>: 264.1206, found: 264.1201.

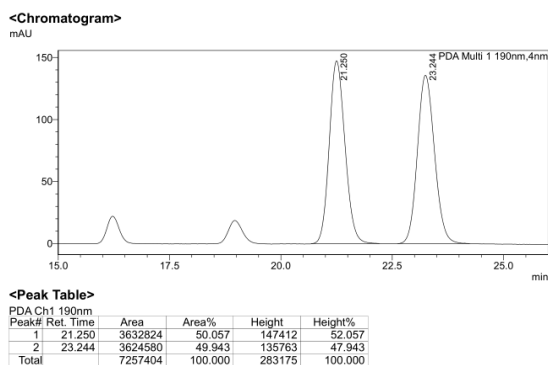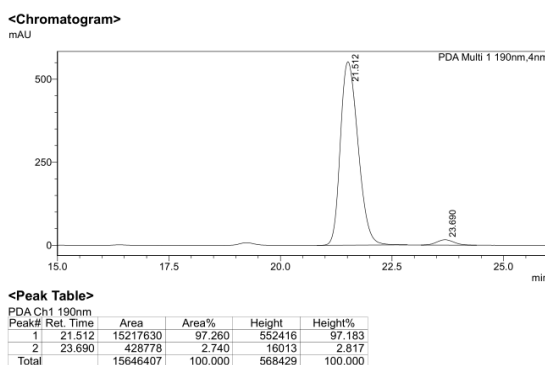

### 4.3 Synthesis of ethyl (*R, E*)-4-(2-oxooxazolidin-3-yl)tetradec-2-enoate (**3ad**).

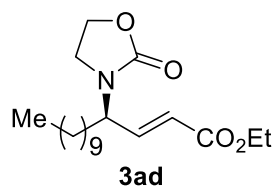

The general procedure was followed using **1a** (8.7 mg, 0.10 mmol) and **2d** (50.5 mg, 0.20 mmol). After purification by column chromatography (PE/EtOAc = 2:1), **3ad** (31.5 mg, 93%) was obtained as a colorless oil.  $[\alpha]_D^{22} = -19.8$  ( $c$  0.10, acetone);  $^1\text{H}$  NMR (400 MHz,  $\text{CDCl}_3$ )  $\delta$  6.80 (dd,  $J = 16.0, 6.0$  Hz, 1H), 5.91 (d,  $J = 16.0$  Hz, 1H), 4.46 (dd,  $J = 14.0, 6.8$  Hz, 1H), 4.34 (t,  $J = 8.0$  Hz, 2H), 4.18 (q,  $J = 7.2$  Hz, 2H), 3.46 (t,  $J = 8.8$  Hz, 2H), 1.67 – 1.58 (m, 2H), 1.32 – 1.21 (m, 19H), 0.85 (t,  $J = 6.0$  Hz, 3H);  $^{13}\text{C}$  NMR (100 MHz,  $\text{CDCl}_3$ )  $\delta$  165.95, 158.02, 144.36, 122.97, 62.08, 60.68, 53.69, 40.21, 31.87, 31.02, 29.53 (d,  $J = 3.2$  Hz), 29.41, 29.28, 29.15, 25.94, 22.66, 14.15 (d,  $J = 10.1$  Hz); Enantiomeric excess: 94%, determined by HPLC (Chiralpak IF hexane/*i*-PrOH = 70/30; flow rate 0.6 ml/min; 25 °C; 190 nm), first peak:  $t_R = 13.7$  min, second peak:  $t_R = 14.5$  min. HRMS (ESI) calcd. for  $\text{C}_{19}\text{H}_{33}\text{NNaO}_4$   $[\text{M}+\text{Na}]^+$ : 362.2302, found: 362.2304.

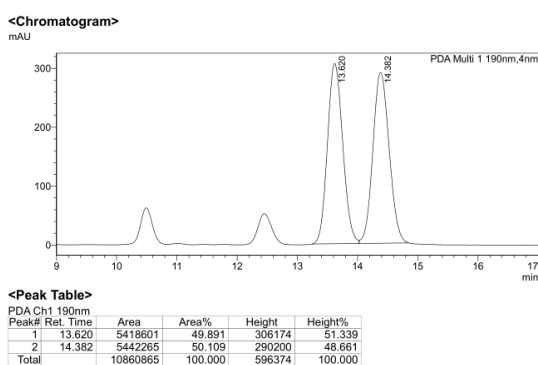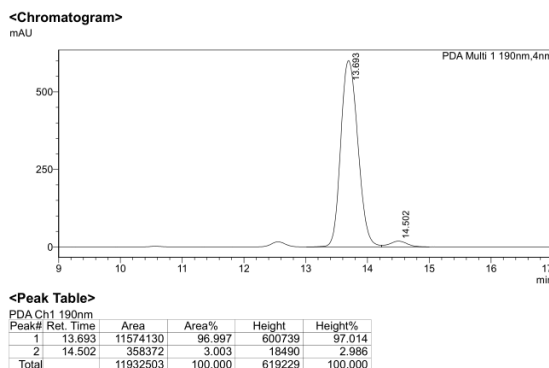

#### 4.4 Synthesis of ethyl (*R, E*)-5-methyl-4-(2-oxooxazolidin-3-yl)hex-2-enoate (**3ae**).

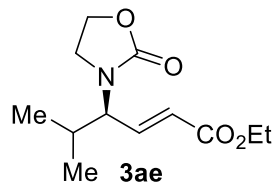

The general procedure was followed using **1a** (8.7 mg, 0.10 mmol) and **2e** (30.8 mg, 0.20 mmol). After purification by column chromatography (PE/EtOAc = 2:1), **3ae** (19.4 mg, 81%) was obtained as a colorless oil.  $[\alpha]_D^{22} = -35.2$  (*c* 0.10, acetone);  $^1\text{H}$  NMR (400 MHz,  $\text{CDCl}_3$ )  $\delta$  6.83 (dd, *J* = 15.6, 8.0 Hz, 1H), 5.98 (d, *J* = 16.0 Hz, 1H), 4.34 (t, *J* = 8.0 Hz, 2H), 4.19 (q, *J* = 7.2 Hz, 2H), 4.03 (t, *J* = 9.2 Hz, 1H), 3.58 – 3.46 (m, 2H), 1.96 – 1.83 (m, 1H), 1.28 (t, *J* = 7.2 Hz, 3H), 0.96 (t, *J* = 7.6 Hz, 6H);  $^{13}\text{C}$  NMR (100 MHz,  $\text{CDCl}_3$ )  $\delta$  165.91, 158.09, 142.49, 124.75, 62.06, 60.65 (d, *J* = 7.1 Hz), 40.79, 29.50, 19.67, 19.40, 14.19; Enantiomeric excess: 96%, determined by HPLC (Chiralpak IF hexane/*i*-PrOH = 70/30; flow rate 0.6 ml/min; 25 °C; 190 nm), first peak: *t*<sub>R</sub> = 13.6 min, second peak: *t*<sub>R</sub> = 15.3 min. HRMS (ESI) calcd. for  $\text{C}_{12}\text{H}_{19}\text{NNaO}_4$  [*M*+Na]<sup>+</sup>: 264.1206, found: 264.1207.

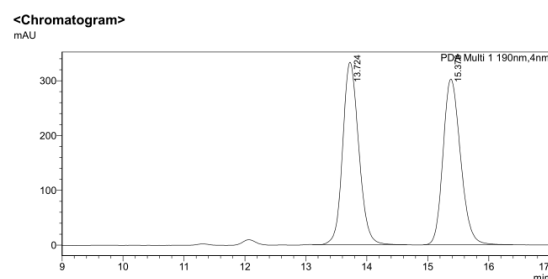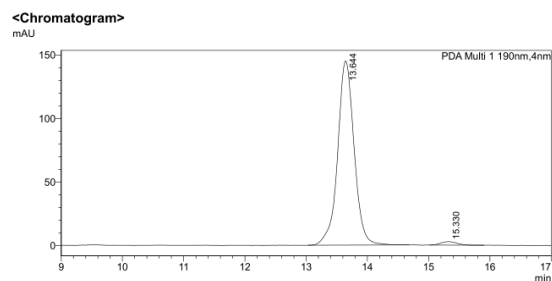

#### 4.5 Synthesis of ethyl (*R, E*)-4-(2-oxooxazolidin-3-yl)-6-phenylhex-2-enoate (**3af**).

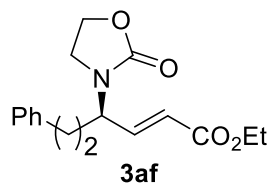

The general procedure was followed using **1a** (8.7 mg, 0.10 mmol) and **2f** (43.3 mg, 0.20 mmol). After purification by column chromatography (PE/EtOAc = 2:1), **3af**



(29.7mg, 98%) was obtained as a colorless oil.  $[\alpha]^{22}_{\text{D}} = -9.3$  ( $c$  0.25, acetone);  $^1\text{H}$  NMR (400 MHz,  $\text{CDCl}_3$ )  $\delta$  7.33 – 7.26 (m, 2H), 7.25 – 7.14 (m, 3H), 6.83 (dd,  $J = 16.0, 6.0$  Hz, 1H), 5.94 (d,  $J = 15.6$  Hz, 1H), 4.55 (q,  $J = 7.2$  Hz, 1H), 4.37 – 4.28 (m, 1H), 4.27 – 4.16 (m, 3H), 3.51 – 3.34 (m, 2H), 2.76 – 2.59 (m, 2H), 2.00 (q,  $J = 7.6$  Hz, 2H), 1.29 (t,  $J = 7.2$  Hz, 3H);  $^{13}\text{C}$  NMR (100 MHz,  $\text{CDCl}_3$ )  $\delta$  165.82, 157.93, 143.86, 140.50, 128.60, 128.32, 126.34, 123.40, 62.09, 60.74, 53.65, 40.38, 32.66, 32.41, 14.20; Enantiomeric excess: 96%, determined by HPLC (Chiralpak IF hexane/*i*-PrOH = 70/30; flow rate 0.6 ml/min; 25 °C; 254 nm), first peak:  $t_{\text{R}} = 22.9$  min, second peak:  $t_{\text{R}} = 25.9$  min. HRMS (ESI) calcd. for  $\text{C}_{17}\text{H}_{21}\text{NNaO}_4$   $[\text{M}+\text{Na}]^+$ : 326.1363, found: 326.1359.

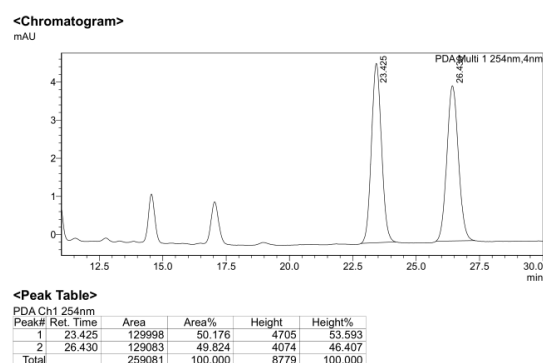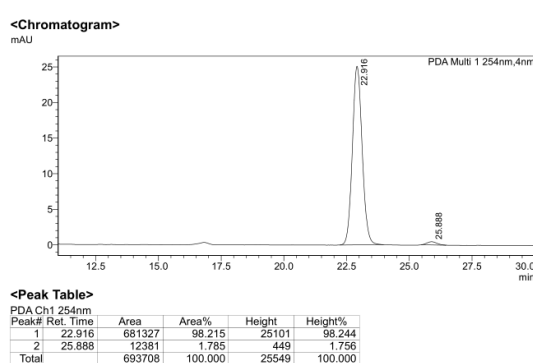

#### 4.6 Synthesis of 1-ethyl 8-methyl (*R*, *E*)-4-(2-oxooxazolidin-3-yl)oct-2-enedioate (**3ag**).

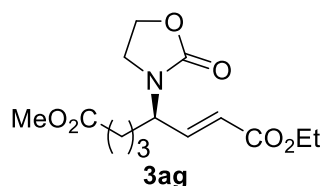

The general procedure was followed using **1a** (8.7 mg, 0.10 mmol) and **2g** (42.4 mg, 0.20 mmol). After purification by column chromatography (PE/EtOAc = 1:1), **3ag** (28.7 mg, 96%) was obtained as a colorless oil.  $[\alpha]^{22}_{\text{D}} = 10.4$  ( $c$  0.25, acetone);  $^1\text{H}$  NMR (400 MHz,  $\text{CDCl}_3$ )  $\delta$  6.81 (dd,  $J = 15.6, 6.0$  Hz, 1H), 5.95 (dd,  $J = 16.0, 1.6$  Hz, 1H), 4.51 (dd,  $J = 12.8, 6.4$  Hz, 1H), 4.39 (t,  $J = 8.0$  Hz, 2H), 4.21 (q,  $J = 7.2$  Hz, 2H), 3.68 (s, 3H), 3.61 – 3.45 (m, 2H), 2.51 – 2.30 (m, 2H), 1.78 – 1.60 (m, 4H), 1.30 (t,  $J = 7.2$  Hz, 3H);  $^{13}\text{C}$  NMR (100 MHz,  $\text{CDCl}_3$ )  $\delta$  173.47, 165.79, 158.08, 143.81, 123.32,

62.17, 60.74, 53.40, 51.64, 40.14, 32.99, 30.28, 21.15, 14.21; Enantiomeric excess: 98%, determined by HPLC (Chiralpak IE hexane/*i*-PrOH = 75/25; flow rate 0.5 ml/min; 25 °C; 254 nm), first peak:  $t_R$  = 64.3 min, second peak:  $t_R$  = 66.6 min. HRMS (ESI) calcd. for  $C_{14}H_{21}NNaO_4$   $[M+Na]^+$ : 322.1263, found: 322.1261.

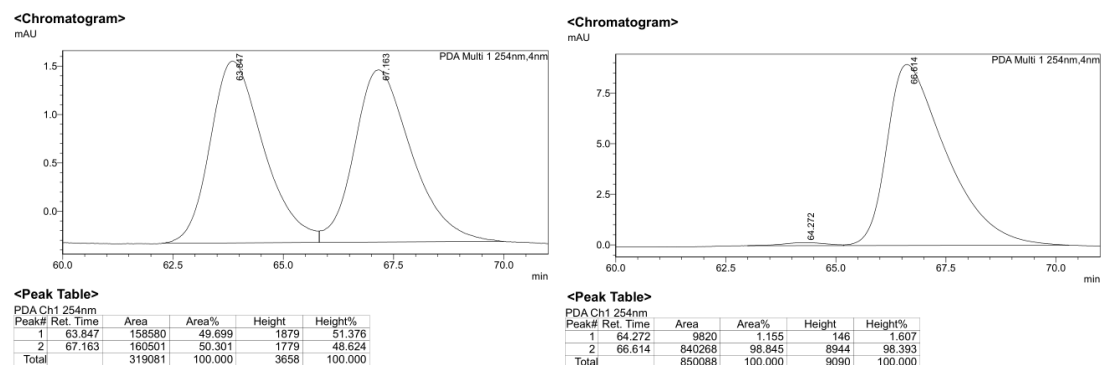

#### 4.7 Synthesis of ethyl (*R*, *E*)-4-(2-oxooxazolidin-3-yl)trideca-2,12-dienoate (**3ah**).

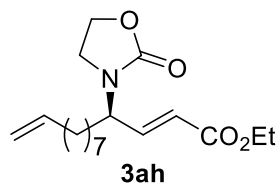

The general procedure was followed using **1a** (8.7 mg, 0.10 mmol) and **2h** (47.2 mg, 0.20 mmol). After purification by column chromatography (PE/EtOAc = 2:1), **3ah** (27.5 mg, 85%) was obtained as a colorless oil.  $[\alpha]_D^{22} = -2.4$  (*c* 0.25, acetone);  $^1H$  NMR (400 MHz,  $CDCl_3$ )  $\delta$  6.80 (dd,  $J$  = 16.0, 6.0 Hz, 1H), 5.91 (d,  $J$  = 15.6 Hz, 1H), 5.84 – 5.72 (m, 1H), 5.03 – 4.86 (m, 2H), 4.51 – 4.43 (m, 1H), 4.34 (t,  $J$  = 8.0 Hz, 2H), 4.18 (q,  $J$  = 7.2 Hz, 2H), 3.50 – 3.42 (m, 2H), 2.05 – 1.98 (m, 2H), 1.67 – 1.58 (m, 2H), 1.36 – 1.25 (m, 13H);  $^{13}C$  NMR (100 MHz,  $CDCl_3$ )  $\delta$  165.92, 158.00, 144.31, 139.05, 123.02, 114.21, 62.07, 60.68, 53.70, 40.24, 33.71, 31.02, 29.22, 29.07, 28.94, 28.82, 25.91, 14.20; Enantiomeric excess: 95%, determined by HPLC (Chiralpak IF hexane/*i*-PrOH = 75/25; flow rate 0.5 ml/min; 25 °C; 190 nm), first peak:  $t_R$  = 19.4 min, second peak:  $t_R$  = 20.6 min. HRMS (ESI) calcd. for  $C_{18}H_{29}NNaO_4$   $[M+Na]^+$ : 346.1989, found: 346.1984.

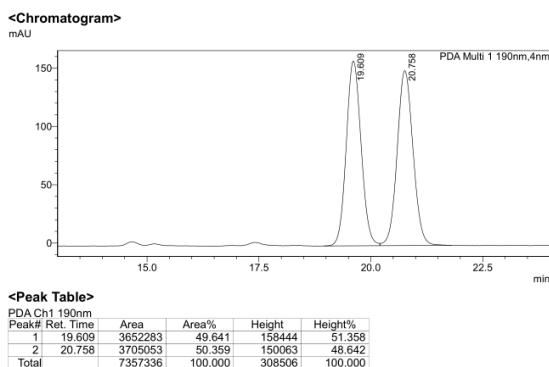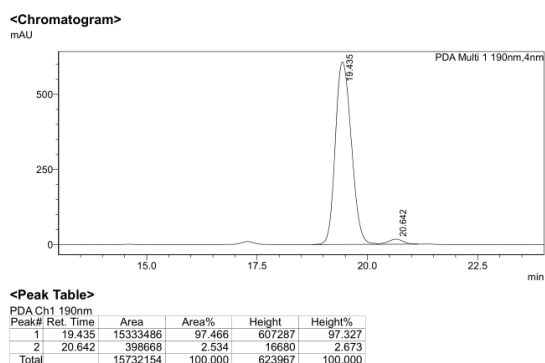

#### 4.8 Synthesis of ethyl (*R, E*)-4-(2-oxooxazolidin-3-yl)non-2-en-8-ynoate (**3ai**).

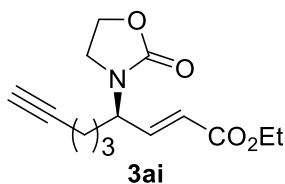

The general procedure was followed using **1a** (8.7 mg, 0.10 mmol) and **2i** (35.6 mg, 0.20 mmol). After purification by column chromatography (PE/EtOAc = 2:1), **3ai** (25.0 mg, 94%) was obtained as a colorless oil.  $[\alpha]_D^{22} = -7.0$  ( $c$  0.25, acetone);  $^1\text{H}$  NMR (400 MHz,  $\text{CDCl}_3$ )  $\delta$  6.80 (dd,  $J = 16.0, 6.0$  Hz, 1H), 5.94 (dd,  $J = 16.0, 1.6$  Hz, 1H), 4.53 – 4.46 (m, 1H), 4.38 – 4.32 (m, 2H), 4.18 (q,  $J = 7.2$  Hz, 2H), 3.49 (dd,  $J = 8.8, 7.2$  Hz, 2H), 2.31 – 2.17 (m, 2H), 1.96 (t,  $J = 2.86$  Hz, 1H), 1.84 – 1.75 (m, 2H), 1.61 – 1.49 (m, 2H), 1.27 (t,  $J = 7.2$  Hz, 3H);  $^{13}\text{C}$  NMR (100 MHz,  $\text{CDCl}_3$ )  $\delta$  165.82, 158.03, 143.87, 123.36, 83.34, 69.27, 62.13, 60.75, 53.24, 40.18, 29.74, 24.66, 17.91, 14.20; Enantiomeric excess: 96%, determined by HPLC (Chiralpak ADH hexane/*i*-PrOH = 85/15; flow rate 0.8 ml/min; 25 °C; 254 nm), first peak:  $t_R = 13.8$  min, second peak:  $t_R = 14.6$  min. HRMS (ESI) calcd. for  $\text{C}_{14}\text{H}_{19}\text{NNaO}_4$   $[\text{M}+\text{Na}]^+$ : 288.1206, found: 288.1201.

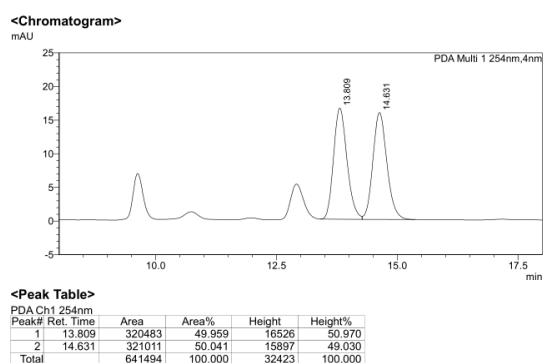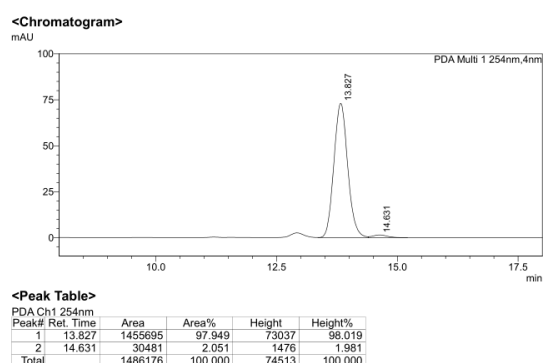

#### 4.9 Synthesis of ethyl (*R, E*)-7-chloro-4-(2-oxooxazolidin-3-yl)hept-2-enoate (**3aj**).

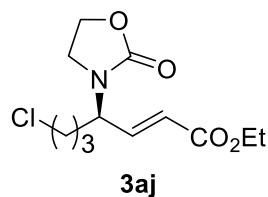

The general procedure was followed using **1a** (8.7 mg, 0.10 mmol) and **2j** (37.7 mg, 0.20 mmol). After purification by column chromatography (PE/EtOAc = 2:1), **3aj** (27.1 mg, 98%) was obtained as a colorless oil.  $[\alpha]_D^{22} = -8.1$  (*c* 0.25, acetone);  $^1\text{H}$  NMR (400 MHz,  $\text{CDCl}_3$ )  $\delta$  6.83 (dd, *J* = 16.0, 6.0 Hz, 1H), 5.97 (d, *J* = 15.6 Hz, 1H), 4.53 (q, *J* = 6.4 Hz, 1H), 4.39 (t, *J* = 8.0 Hz, 2H), 4.21 (q, *J* = 7.2 Hz, 2H), 3.65 – 3.55 (m, 2H), 3.51 (t, *J* = 8.0 Hz, 2H), 1.90 – 1.76 (m, 4H), 1.30 (t, *J* = 7.2 Hz, 3H);  $^{13}\text{C}$  NMR (100 MHz,  $\text{CDCl}_3$ )  $\delta$  165.72, 158.02, 143.54, 123.62, 62.16, 60.80, 53.01, 44.22, 40.18, 28.80, 28.11, 14.20; Enantiomeric excess: 97%, determined by HPLC (Chiralpak IF hexane/*i*-PrOH = 75/25; flow rate 0.5 ml/min; 25 °C; 254 nm), first peak:  $t_R$  = 34.5 min, second peak:  $t_R$  = 44.6 min. HRMS (ESI) calcd. for  $\text{C}_{12}\text{H}_{18}\text{ClNNaO}_4$   $[\text{M}+\text{Na}]^+$ : 298.0817, found: 298.0809.

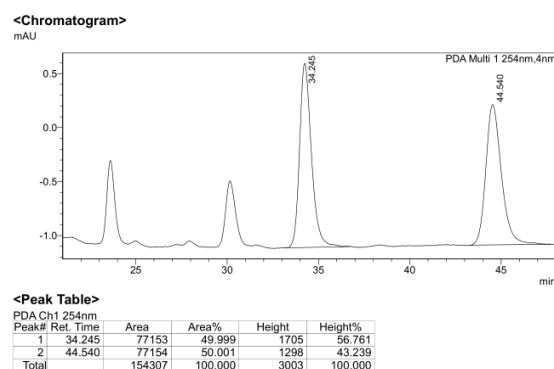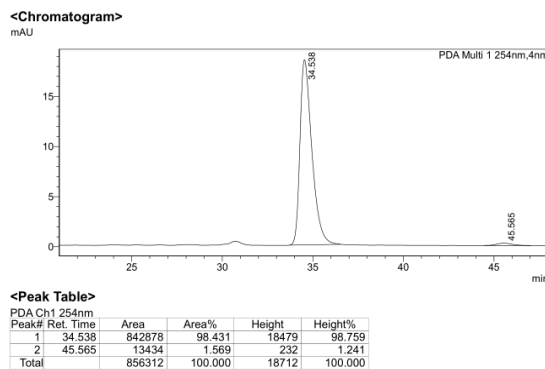

#### 4.10 Synthesis of ethyl (*R, E*)-8-acetoxy-4-(2-oxooxazolidin-3-yl)oct-2-enoate (**3ak**).

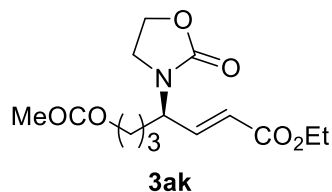

The general procedure was followed using **1a** (8.7 mg, 0.10 mmol) and **2k** (42.4 mg, 0.20 mmol). After purification by column chromatography (PE/EtOAc = 2:1), **3ak**

(24.7 mg, 96%) was obtained as a colorless oil.  $[\alpha]_D^{22} = -1.4$  ( $c$  0.25, acetone);  $^1\text{H}$  NMR (400 MHz,  $\text{CDCl}_3$ )  $\delta$  6.80 (dd,  $J = 16.0, 6.0$  Hz, 1H), 5.94 (dd,  $J = 16.0, 1.6$  Hz, 1H), 4.54 – 4.44 (m, 1H), 4.35 (t,  $J = 8.0$  Hz, 2H), 4.19 (q,  $J = 7.2$  Hz, 2H), 4.11 – 4.05 (m, 2H), 3.52 – 3.42 (m, 2H), 2.03 (s, 3H), 1.76 – 1.62 (m, 4H), 1.27 (t,  $J = 7.2$  Hz, 3H);  $^{13}\text{C}$  NMR (100 MHz,  $\text{CDCl}_3$ )  $\delta$  170.98, 165.74, 157.96, 143.53, 123.61, 63.51, 62.11, 60.77, 53.49, 40.28, 27.64, 25.25, 20.89, 14.18; Enantiomeric excess: 97%, determined by HPLC (Chiralpak IF hexane/*i*-PrOH = 70/30; flow rate 0.6 ml/min; 25 °C; 210 nm), first peak:  $t_R = 34.8$  min, second peak:  $t_R = 36.5$  min. HRMS (ESI) calcd. for  $\text{C}_{14}\text{H}_{21}\text{NNaO}_6$   $[\text{M}+\text{Na}]^+$ : 322.1261, found: 322.1257.

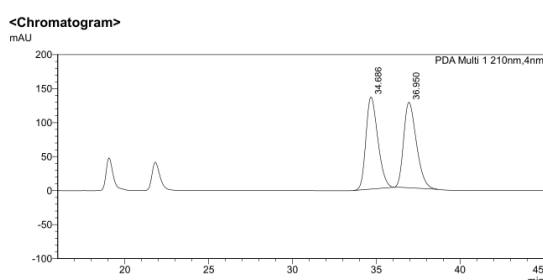

<Peak Table>

| Peak# | Rel. Time | Area     | Area%   | Height | Height% |
|-------|-----------|----------|---------|--------|---------|
| 1     | 34.686    | 6676915  | 50.084  | 135446 | 51.843  |
| 2     | 36.950    | 6654528  | 49.916  | 125815 | 48.157  |
| Total |           | 13331443 | 100.000 | 261261 | 100.000 |

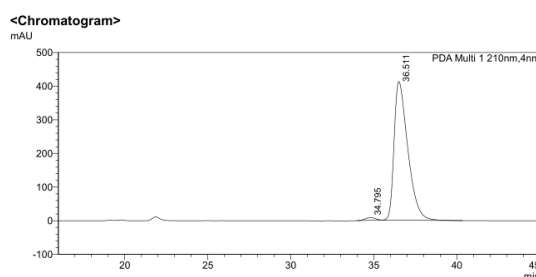

<Peak Table>

| Peak# | Rel. Time | Area     | Area%   | Height | Height% |
|-------|-----------|----------|---------|--------|---------|
| 1     | 34.795    | 336591   | 1.405   | 7935   | 1.889   |
| 2     | 36.511    | 23625498 | 98.595  | 412067 | 98.111  |
| Total |           | 23962089 | 100.000 | 420002 | 100.000 |

#### 4.11 Synthesis of ethyl (*R, E*)-4-cyclopentyl-4-(2-oxooxazolidin-3-yl)but-2-enoate (**3al**).

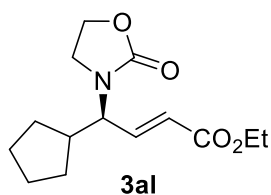

The general procedure was followed using **1a** (8.7 mg, 0.10 mmol) and **2l** (36.1 mg, 0.20 mmol). After purification by column chromatography (PE/EtOAc = 2:1), **3al** (22.0 mg, 82%) was obtained as a colorless oil.  $[\alpha]_D^{22} = -35.8$  ( $c$  0.10, acetone);  $^1\text{H}$  NMR (400 MHz,  $\text{CDCl}_3$ )  $\delta$  6.84 (dd,  $J = 16.0, 6.8$  Hz, 1H), 5.95 (d,  $J = 15.6$  Hz, 1H), 4.36 (t,  $J = 8.0$  Hz, 2H), 4.21 (dd,  $J = 13.6, 6.8$  Hz, 3H), 3.57 – 3.50 (m, 2H), 2.18 – 2.06 (m, 1H), 1.83 – 1.54 (m, 7H), 1.33 – 1.27 (m, 4H);  $^{13}\text{C}$  NMR (100 MHz,  $\text{CDCl}_3$ )  $\delta$  166.03, 158.05, 143.27, 123.58, 62.09, 60.67, 59.00, 40.89, 40.73, 30.30, 29.75, 25.55, 25.08, 14.20; Enantiomeric excess: 96%, determined by HPLC (Chiralpak IF

hexane/*i*-PrOH = 70/30; flow rate 0.6 ml/min; 25 °C; 254 nm), first peak:  $t_R$  = 17.2 min, second peak:  $t_R$  = 19.1 min. HRMS (ESI) calcd. for  $C_{14}H_{21}NNaO_4$   $[M+Na]^+$ : 290.1363, found: 290.1363.

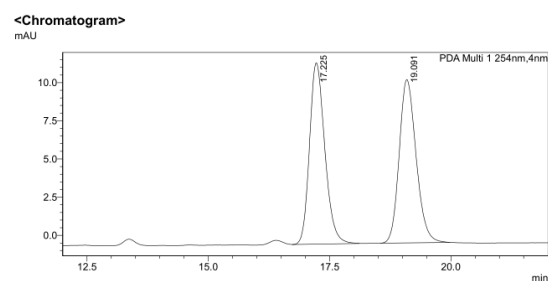

<Peak Table>

| Peak# | Ret. Time | Area   | Area%   | Height | Height% |
|-------|-----------|--------|---------|--------|---------|
| 1     | 17.225    | 260612 | 50.158  | 11876  | 52.622  |
| 2     | 19.091    | 258973 | 49.842  | 10692  | 47.378  |
| Total |           | 519585 | 100.000 | 22568  | 100.000 |

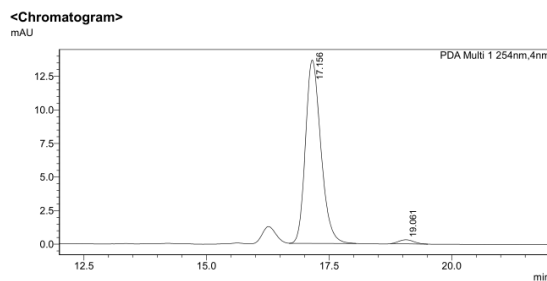

<Peak Table>

| Peak# | Ret. Time | Area   | Height | Area%   | Conc. | Height% |
|-------|-----------|--------|--------|---------|-------|---------|
| 1     | 17.156    | 298288 | 13660  | 97.872  | 0.000 | 97.815  |
| 2     | 19.061    | 6486   | 305    | 2.128   | 0.000 | 2.185   |
| Total |           | 304774 | 13965  | 100.000 |       | 100.000 |

#### 4.12 Synthesis of ethyl (*R*, *E*)-4-cyclohexyl-4-(2-oxooxazolidin-3-yl)but-2-enoate (**3am**).

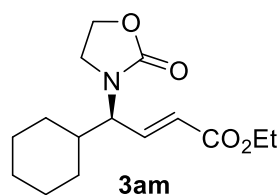

The general procedure was followed using **1a** (8.7 mg, 0.10 mmol) and **2m** (38.9 mg, 0.20 mmol). After purification by column chromatography (PE/EtOAc = 2:1), **3am** (17.0 mg, 60%) was obtained as a colorless oil.  $[\alpha]_D^{22} = -8.9$  ( $c$  0.25, acetone);  $^1H$  NMR (400 MHz,  $CDCl_3$ )  $\delta$  6.82 (dd,  $J$  = 15.6, 8.4 Hz, 1H), 5.97 (d,  $J$  = 15.6 Hz, 1H), 4.32 (q,  $J$  = 8.0 Hz, 2H), 4.19 (q,  $J$  = 7.2 Hz, 2H), 4.11 (t,  $J$  = 9.6 Hz, 1H), 3.57 – 3.44 (m, 2H), 1.80 – 1.62 (m, 6H), 1.61 – 1.52 (m, 1H), 1.28 (t,  $J$  = 7.2 Hz, 3H), 1.25 – 1.09 (m, 2H), 1.01 (m, 2H);  $^{13}C$  NMR (100 MHz,  $CDCl_3$ )  $\delta$  165.94, 158.10, 142.36, 124.82, 62.03, 60.68, 59.38, 40.82, 38.38, 30.06, 29.56, 26.06, 25.63, 14.20; Enantiomeric excess: 95%, determined by HPLC (Chiralpak IF hexane/*i*-PrOH = 80/20; flow rate 0.6 ml/min; 25 °C; 254 nm), first peak:  $t_R$  = 21.5 min, second peak:  $t_R$  = 22.8 min. HRMS (ESI) calcd. for  $C_{15}H_{23}NNaO_4$   $[M+Na]^+$ : 304.1519, found: 304.1520.

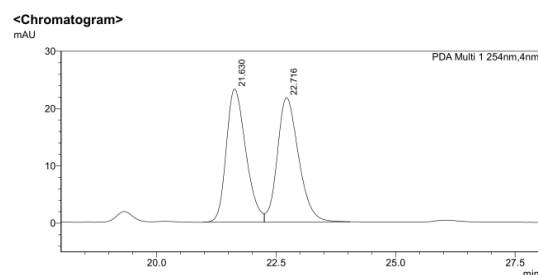

<Peak Table>

| Peak# | Ret. Time | Area    | Area%   | Height | Height% |
|-------|-----------|---------|---------|--------|---------|
| 1     | 21.630    | 661444  | 49.669  | 23257  | 51.735  |
| 2     | 22.716    | 670251  | 50.331  | 21697  | 48.265  |
| Total |           | 1331695 | 100.000 | 44954  | 100.000 |

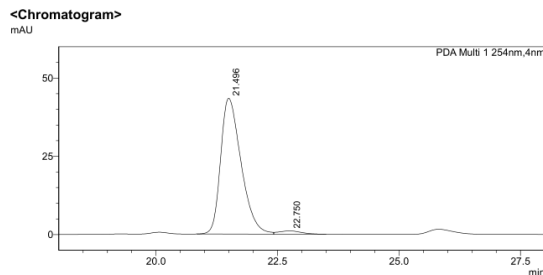

<Peak Table>

| Peak# | Ret. Time | Area    | Area%   | Height | Height% |
|-------|-----------|---------|---------|--------|---------|
| 1     | 21.496    | 1269731 | 97.500  | 43389  | 97.681  |
| 2     | 22.750    | 32561   | 2.500   | 1030   | 2.319   |
| Total |           | 1302292 | 100.000 | 44419  | 100.000 |

### 4.13 Synthesis of ethyl (*R*, *E*)-7-(1,3-dioxoisindolin-2-yl)-4-(2-oxooxazolidin-3-yl)oct-2-enoate (**3an**).

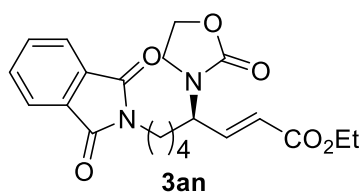

The general procedure was followed using **1a** (8.7 mg, 0.10 mmol) and **2n** (62.6 mg, 0.20 mmol). After purification by column chromatography (PE/EtOAc = 1:1), **3an** (40.1 mg, 97%) was obtained as a colorless oil.  $[\alpha]_D^{22} = -11.8$  (*c* 0.25, acetone);  $^1\text{H}$  NMR (400 MHz,  $\text{CDCl}_3$ )  $\delta$  7.78 – 7.70 (m, 2H), 7.70 – 7.60 (m, 2H), 6.74 (dd, *J* = 16.0, 6.0 Hz, 1H), 5.86 (d, *J* = 16.0 Hz, 1H), 4.39 (dd, *J* = 13.6, 6.8 Hz, 1H), 4.29 (t, *J* = 7.6 Hz, 2H), 4.11 (q, *J* = 7.2 Hz, 2H), 3.60 (t, *J* = 6.8 Hz, 2H), 3.51 – 3.38 (m, 2H), 1.74 – 1.59 (m, 4H), 1.38 – 1.26 (m, 2H), 1.21 (t, *J* = 7.2 Hz, 3H);  $^{13}\text{C}$  NMR (100 MHz,  $\text{CDCl}_3$ )  $\delta$  168.32, 165.74, 157.97, 143.93, 133.97, 131.99, 123.23, 123.15, 62.14, 60.62, 53.64, 40.26, 37.27, 30.40, 27.99, 23.08, 14.16; Enantiomeric excess: 96%, determined by HPLC (Chiralpak ADH hexane/*i*-PrOH = 70/30; flow rate 0.8 ml/min; 25 °C; 254 nm), first peak: *t*<sub>R</sub> = 22.4 min, second peak: *t*<sub>R</sub> = 30.2 min. HRMS (ESI) calcd. for  $\text{C}_{21}\text{H}_{24}\text{N}_2\text{NaO}_6$  [*M*+Na]<sup>+</sup>: 423.1527, found: 423.1521.

&lt;Chromatogram&gt;

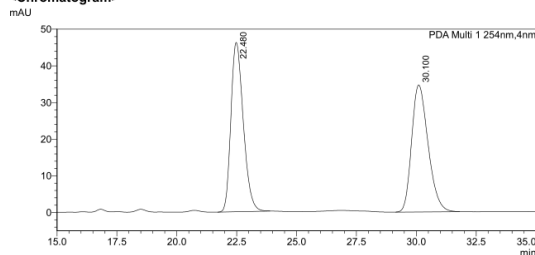

&lt;Peak Table&gt;

| Peak# | Ret. Time | Area    | Area%   | Height | Height% |
|-------|-----------|---------|---------|--------|---------|
| 1     | 22.460    | 1660872 | 50.065  | 46177  | 57.121  |
| 2     | 30.100    | 1656543 | 49.935  | 34664  | 42.879  |
| Total |           | 3317415 | 100.000 | 80841  | 100.000 |

&lt;Chromatogram&gt;

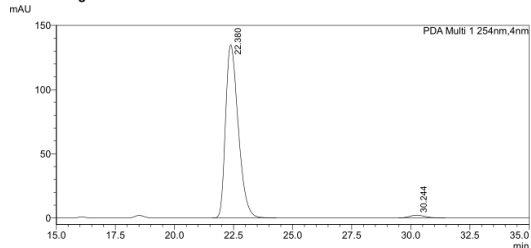

&lt;Peak Table&gt;

| Peak# | Ret. Time | Area    | Area%   | Height | Height% |
|-------|-----------|---------|---------|--------|---------|
| 1     | 22.380    | 5029273 | 98.062  | 134974 | 98.424  |
| 2     | 30.244    | 99410   | 1.938   | 2161   | 1.576   |
| Total |           | 5128684 | 100.000 | 137135 | 100.000 |

#### 4.14 Synthesis of methyl (*R, E*)-4-(2-oxooxazolidin-3-yl)hex-2-enoate (**3ao**).

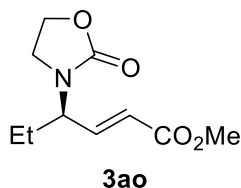

The general procedure was followed using **1a** (8.7 mg, 0.10 mmol) and **2o** (25.2 mg, 0.20 mmol). After purification by column chromatography (PE/EtOAc = 2:1), **3ao** (20.9 mg, 98%) was obtained as a colorless oil.  $[\alpha]_D^{22} = -0.9$  ( $c$  0.25, acetone);  $^1\text{H}$  NMR (400 MHz,  $\text{CDCl}_3$ )  $\delta$  6.83 (dd,  $J = 16.0, 6.0$  Hz, 1H), 5.94 (dd,  $J = 16.0, 1.6$  Hz, 1H), 4.45 – 4.39 (m, 1H), 4.36 (dd,  $J = 8.8, 7.2$  Hz, 2H), 3.75 (s, 3H), 3.52 – 3.44 (m, 2H), 1.78 – 1.64 (m, 2H), 0.97 (t,  $J = 7.2$  Hz, 3H);  $^{13}\text{C}$  NMR (100 MHz,  $\text{CDCl}_3$ )  $\delta$  166.28, 158.03, 144.34, 122.83, 62.03, 55.32, 51.68, 40.26, 24.28, 10.50; Enantiomeric excess: 96%, determined by HPLC (Chiralpak IF hexane/*i*-PrOH = 70/30; flow rate 0.6 ml/min; 25 °C; 190 nm), first peak:  $t_R = 20.3$  min, second peak:  $t_R = 22.2$  min. HRMS (ESI) calcd. for  $\text{C}_{10}\text{H}_{15}\text{NNaO}_4$   $[\text{M}+\text{Na}]^+$ : 236.0893, found: 236.0893.

&lt;Chromatogram&gt;

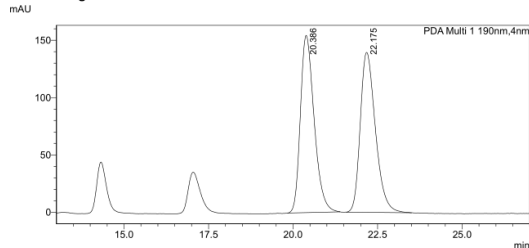

&lt;Peak Table&gt;

| Peak# | Ret. Time | Area    | Area%   | Height | Height% |
|-------|-----------|---------|---------|--------|---------|
| 1     | 20.386    | 4367733 | 50.111  | 154569 | 52.561  |
| 2     | 22.175    | 4348411 | 49.889  | 139506 | 47.439  |
| Total |           | 8716143 | 100.000 | 294076 | 100.000 |

&lt;Chromatogram&gt;

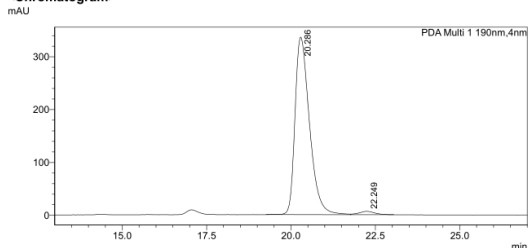

&lt;Peak Table&gt;

| Peak# | Ret. Time | Area     | Area%   | Height | Height% |
|-------|-----------|----------|---------|--------|---------|
| 1     | 20.286    | 10010726 | 98.030  | 335831 | 98.150  |
| 2     | 22.249    | 201176   | 1.970   | 6330   | 1.850   |
| Total |           | 10211903 | 100.000 | 342161 | 100.000 |



#### 4.15 Synthesis of tert-butyl (*R, E*)-4-(2-oxooxazolidin-3-yl)hex-2-enoate (**3ap**).

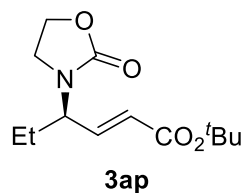

The general procedure was followed using **1a** (8.7 mg, 0.10 mmol) and **2p** (33.6 mg, 0.20 mmol). After purification by column chromatography (PE/EtOAc = 2:1), **3ap** (21.0 mg, 87%) was obtained as a colorless oil.  $[\alpha]_D^{22} = -1.9$  (*c* 0.25, acetone);  $^1\text{H}$  NMR (400 MHz,  $\text{CDCl}_3$ )  $\delta$  6.72 (dd, *J* = 15.6, 6.0 Hz, 1H), 5.86 (dd, *J* = 15.6, 1.6 Hz, 1H), 4.43 – 4.34 (m, 3H), 3.54 – 3.44 (m, 2H), 1.78 – 1.60 (m, 2H), 1.49 (s, 9H), 0.97 (t, *J* = 7.2 Hz, 3H);  $^{13}\text{C}$  NMR (100 MHz,  $\text{CDCl}_3$ )  $\delta$  165.26, 158.15, 142.83, 124.87, 80.93, 62.08, 55.20, 40.15, 28.07, 24.28, 10.61; Enantiomeric excess: 93%, determined by HPLC (Chiralpak IF hexane/*i*-PrOH = 80/20; flow rate 0.6 ml/min; 25 °C; 210 nm), first peak: *t*<sub>R</sub> = 16.6 min, second peak: *t*<sub>R</sub> = 17.8 min. HRMS (ESI) calcd. for  $\text{C}_{13}\text{H}_{21}\text{NNaO}_4$  [*M*+*Na*]<sup>+</sup>: 278.1363, found: 278.1359.

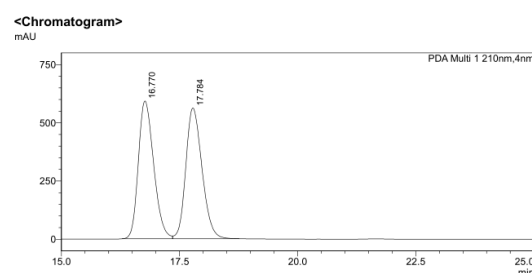

<Peak Table>  
PDA Ch1 210nm

| Peak# | Ret. Time | Area     | Area%   | Height  | Height% |
|-------|-----------|----------|---------|---------|---------|
| 1     | 16.770    | 13375769 | 49.919  | 592107  | 51.316  |
| 2     | 17.784    | 13419278 | 50.081  | 561743  | 48.684  |
| Total |           | 26795047 | 100.000 | 1153850 | 100.000 |

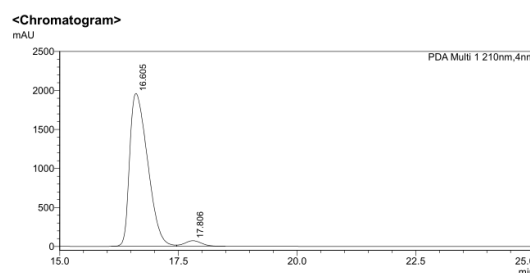

<Peak Table>  
PDA Ch1 210nm

| Peak# | Ret. Time | Area     | Area%   | Height  | Height% |
|-------|-----------|----------|---------|---------|---------|
| 1     | 16.605    | 51739262 | 96.626  | 1961604 | 96.446  |
| 2     | 17.806    | 1806511  | 3.374   | 72294   | 3.554   |
| Total |           | 53545774 | 100.000 | 2033899 | 100.000 |

#### 4.16 Synthesis of benzyl (*R, E*)-4-(2-oxooxazolidin-3-yl)hex-2-enoate (**3aq**).

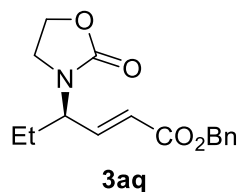

The general procedure was followed using **1a** (8.7 mg, 0.10 mmol) and **2q** (40.5 mg, 0.20 mmol). After purification by column chromatography (PE/EtOAc = 2:1), **3aq** (28.3 mg, 98%) was obtained as a colorless oil.  $[\alpha]_D^{22} = -5.0$  (*c* 0.25, acetone);  $^1\text{H}$  NMR (400 MHz,  $\text{CDCl}_3$ )  $\delta$  7.42 – 7.30 (m, 5H), 6.87 (dd, *J* = 15.6, 5.6 Hz, 1H), 5.99

(dd,  $J = 15.6, 0.8$  Hz, 1H), 5.19 (s, 2H), 4.45 – 4.38 (m, 1H), 4.38 – 4.33 (m, 2H), 3.51 – 3.43 (m, 2H), 1.77 – 1.61 (m, 2H), 0.97 (t,  $J = 7.2$  Hz, 3H);  $^{13}\text{C}$  NMR (100 MHz,  $\text{CDCl}_3$ )  $\delta$  165.72, 158.13, 144.84, 135.68, 128.62, 128.38, 122.76, 66.56, 62.10, 55.28, 40.18, 24.21, 10.60; Enantiomeric excess: 97%, determined by HPLC (Chiralpak IF hexane/*i*-PrOH = 70/30; flow rate 0.6 ml/min; 25 °C; 254 nm), first peak:  $t_R = 20.8$  min, second peak:  $t_R = 22.5$  min. HRMS (ESI) calcd. for  $\text{C}_{16}\text{H}_{19}\text{NNaO}_4$   $[\text{M}+\text{Na}]^+$ : 312.1206, found: 312.1209.

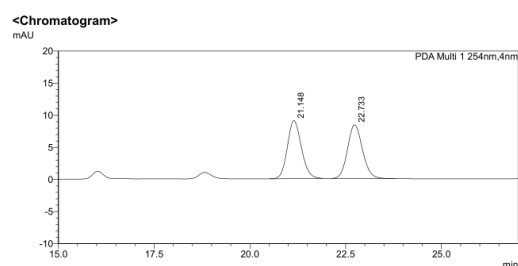

<Peak Table>

| Peak# | Ret. Time | Area   | Area%   | Height | Height% |
|-------|-----------|--------|---------|--------|---------|
| 1     | 21.148    | 229382 | 50.205  | 9023   | 51.870  |
| 2     | 22.733    | 227506 | 49.795  | 8372   | 48.130  |
| Total |           | 456888 | 100.000 | 17395  | 100.000 |

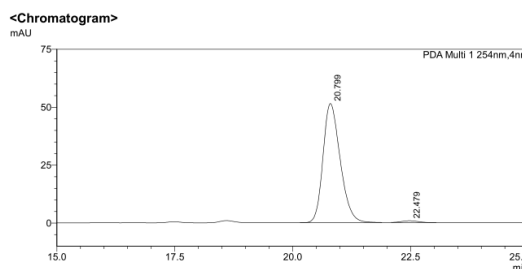

<Peak Table>

| Peak# | Ret. Time | Area    | Area%   | Height | Height% |
|-------|-----------|---------|---------|--------|---------|
| 1     | 20.799    | 1306288 | 98.541  | 51477  | 98.494  |
| 2     | 22.479    | 19345   | 1.459   | 787    | 1.506   |
| Total |           | 1325633 | 100.000 | 52264  | 100.000 |

#### 4.17 Synthesis of ethyl (*R, E*)-4-(2-oxooxazolidin-3-yl)hex-2-enoate (**3aa**).

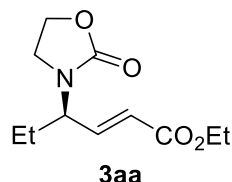

The general procedure was followed using **1a** (8.7 mg, 0.10 mmol) and **2a** (28.0 mg, 0.20 mmol). After purification by column chromatography (PE/EtOAc = 2:1), **3aa** (20.4 mg, 90%) was obtained as a colorless oil.  $[\alpha]_D^{22} = -1.4$  ( $c$  0.25, acetone);  $^1\text{H}$  NMR (400 MHz,  $\text{CDCl}_3$ )  $\delta$  6.80 (dd,  $J = 15.6, 5.6$  Hz, 1H), 5.91 (dd,  $J = 15.6, 1.6$  Hz, 1H), 4.49 – 4.28 (m, 3H), 4.18 (q,  $J = 6.8$  Hz, 2H), 3.55 – 3.35 (m, 2H), 1.75 – 1.60 (m, 2H), 1.27 (t,  $J = 7.2$  Hz, 3H), 0.95 (t,  $J = 7.2$  Hz, 3H);  $^{13}\text{C}$  NMR (100 MHz,  $\text{CDCl}_3$ )  $\delta$  165.94, 158.15, 144.10, 123.13, 62.11, 60.72, 55.25, 40.17, 24.23, 14.21, 10.60; Enantiomeric excess: 97%, determined by HPLC (Chiralpak IF hexane/*i*-PrOH = 70/30; flow rate 0.6 ml/min; 25 °C; 190 nm), first peak:  $t_R = 17.5$  min, second peak:  $t_R = 19.0$  min. HRMS (ESI) calcd. for  $\text{C}_{11}\text{H}_{17}\text{NNaO}_4$   $[\text{M}+\text{Na}]^+$ : 250.1050, found: 250.1043.

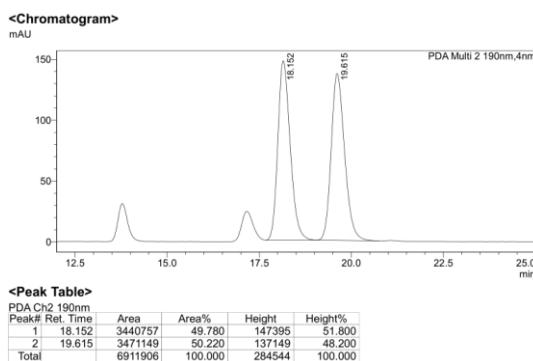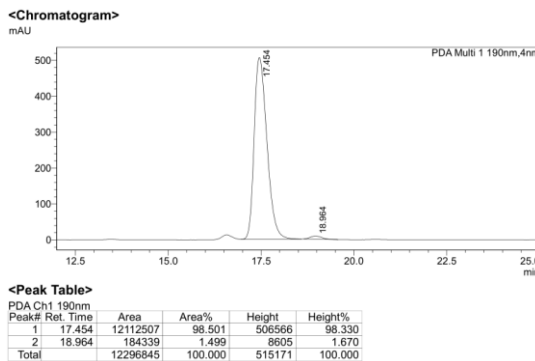

#### 4.18 Synthesis of ethyl (*R*, *E*)-4-(5,5-dimethyl-2-oxooxazolidin-3-yl)hex-2-enoate (**3ba**).

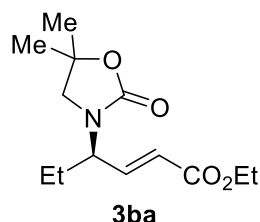

The general procedure was followed using **1b** (11.5 mg, 0.10 mmol) and **2a** (28.0 mg, 0.20 mmol). After purification by column chromatography (PE/EtOAc = 2:1), **3ba** (17.2 mg, 67%) was obtained as a colorless oil.  $[\alpha]_D^{22} = -30.2$  (*c* 0.10, acetone);  $^1\text{H}$  NMR (400 MHz,  $\text{CDCl}_3$ )  $\delta$  6.80 (dd, *J* = 15.6, 6.0 Hz, 1H), 5.92 (d, *J* = 16.0 Hz, 1H), 4.45 – 4.36 (m, 1H), 4.19 (q, *J* = 7.2 Hz, 2H), 3.18 (q, *J* = 8.4 Hz, 2H), 1.71 – 1.59 (m, 2H), 1.46 (s, 6H), 1.28 (t, *J* = 7.2 Hz, 3H), 0.96 (t, *J* = 7.6 Hz, 3H);  $^{13}\text{C}$  NMR (100 MHz,  $\text{CDCl}_3$ )  $\delta$  165.96, 157.24, 144.25, 123.18, 77.73, 60.67, 54.91, 52.29, 27.52, 27.38, 24.27, 14.20, 10.55; Enantiomeric excess: 97%, determined by HPLC (Chiralpak IF hexane/*i*-PrOH = 90/10; flow rate 0.5 ml/min; 25 °C; 254 nm), first peak:  $t_R$  = 52.2 min, second peak:  $t_R$  = 56.9 min. HRMS (ESI) calcd. for  $\text{C}_{13}\text{H}_{21}\text{NNaO}_4$   $[\text{M}+\text{Na}]^+$ : 278.1356, found: 278.1363.

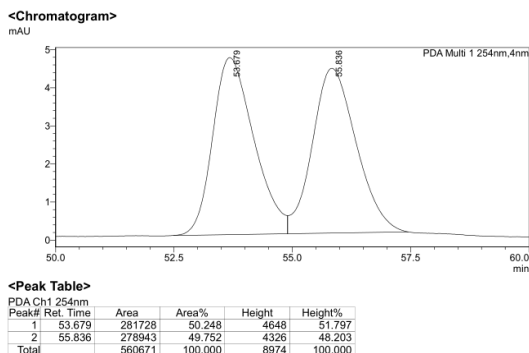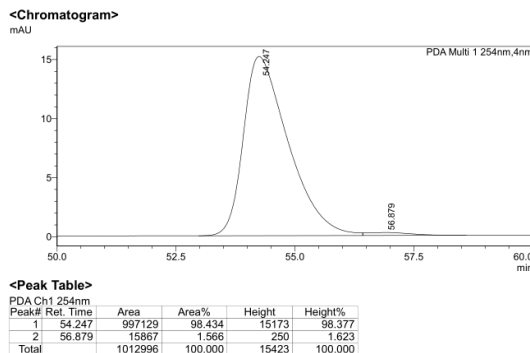

#### 4.19 Synthesis of ethyl (*R, E*)-4-((*R*)-5-methyl-2-oxooxazolidin-3-yl)hex-2-enoate (**3ca**).

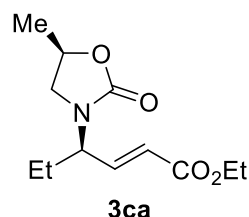

The general procedure was followed using **1c** (10.1 mg, 0.10 mmol) and **2a** (28.0 mg, 0.20 mmol). After purification by column chromatography (PE/EtOAc = 1:1), **3ca** (20.0 mg, 83%) was obtained as a colorless oil.  $[\alpha]_D^{22} = 11.4$  ( $c$  0.25, acetone);  $^1\text{H}$  NMR (400 MHz,  $\text{CDCl}_3$ )  $\delta$  6.79 (dd,  $J = 15.6, 6.0$  Hz, 1H), 5.92 (d,  $J = 16.0$  Hz, 1H), 4.70 – 4.60 (m, 1H), 4.37 (dd,  $J = 14.8, 6.4$  Hz, 1H), 4.19 (q,  $J = 7.2$  Hz, 2H), 3.53 (t,  $J = 8.0$  Hz, 1H), 3.07 – 3.00 (m, 1H), 1.75 – 1.57 (m, 2H), 1.43 (d,  $J = 6.4$  Hz, 3H), 1.28 (t,  $J = 7.2$  Hz, 3H), 0.95 (t,  $J = 7.6$  Hz, 3H);  $^{13}\text{C}$  NMR (100 MHz,  $\text{CDCl}_3$ )  $\delta$  165.94, 157.73, 144.02, 123.31, 70.49, 60.68, 55.08, 46.95, 24.31, 20.67, 14.20, 10.56; Diastereoisomeric excess: > 99%, determined by HPLC (Chiralpak ID + ID hexane/*i*-PrOH = 95/5; flow rate 1.2 ml/min; 25 °C; 190 nm), first peak:  $t_r = 225.8$  min; HRMS (ESI) calcd. for  $\text{C}_{12}\text{H}_{19}\text{NNaO}_4$   $[\text{M}+\text{Na}]^+$ : 264.1206, found: 264.1204.

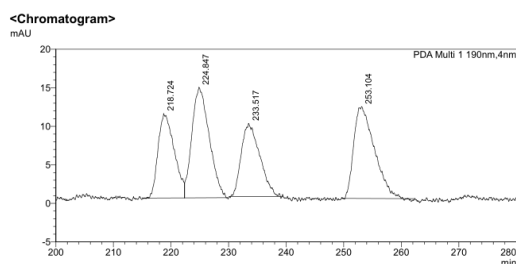

<Peak Table>

| Peak# | Ret. Time | Area     | Area%   | Height | Height% |
|-------|-----------|----------|---------|--------|---------|
| 1     | 218.724   | 2134132  | 20.883  | 10987  | 23.454  |
| 2     | 224.847   | 2999082  | 29.347  | 14374  | 30.684  |
| 3     | 233.517   | 2118146  | 20.727  | 9534   | 20.354  |
| 4     | 253.104   | 2968003  | 29.043  | 11949  | 25.508  |
| Total |           | 10219363 | 100.000 | 46844  | 100.000 |

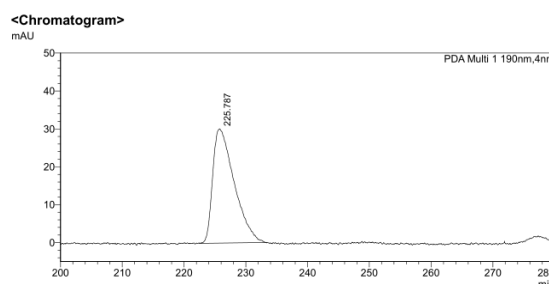

<Peak Table>

| Peak# | Ret. Time | Area    | Area%   | Height | Height% |
|-------|-----------|---------|---------|--------|---------|
| 1     | 225.787   | 7289744 | 100.000 | 30133  | 100.000 |
| Total |           | 7289744 | 100.000 | 30133  | 100.000 |

#### 4.20 Synthesis of ethyl (*R, E*)-4-((*S*)-5-methyl-2-oxooxazolidin-3-yl)hex-2-enoate (**3da**).

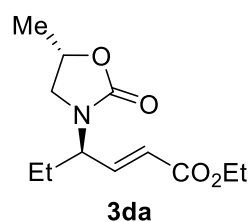

The general procedure was followed using **1d** (10.1 mg, 0.10 mmol) and **2a** (28.0 mg, 0.20 mmol). After purification by column chromatography (PE/EtOAc = 1:1), **3da** (18.3 mg, 76%) was obtained as a colorless oil.  $[\alpha]_D^{22} = -48.2$  ( $c$  0.10, acetone);  $^1\text{H}$  NMR (400 MHz,  $\text{CDCl}_3$ )  $\delta$  6.80 (dd,  $J = 16.0, 6.0$  Hz, 1H), 5.91 (dd,  $J = 16.0, 1.6$  Hz, 1H), 4.73 – 4.59 (m, 1H), 4.46 – 4.34 (m, 1H), 4.18 (q,  $J = 7.2$  Hz, 2H), 3.55 (t,  $J = 8.4$  Hz, 1H), 3.01 (dd,  $J = 8.4, 6.9$  Hz, 1H), 1.73 – 1.58 (m, 2H), 1.43 (d,  $J = 6.0$  Hz, 3H), 1.27 (t,  $J = 7.2$  Hz, 3H), 0.95 (t,  $J = 7.2$  Hz, 3H);  $^{13}\text{C}$  NMR (100 MHz,  $\text{CDCl}_3$ )  $\delta$  165.94, 157.72, 144.32, 122.97, 70.35, 60.67, 55.01, 46.95, 24.18, 20.78, 14.19, 10.54; Diastereoisomeric exes: 97%, determined by HPLC (Chiralpak ID + ID hexane/*i*-PrOH = 95/5; flow rate 1.2 ml/min; 25 °C; 190 nm), first peak:  $t_R = 220.4$  min, second peak:  $t_R = 229.9$  min; HRMS (ESI) calcd. for  $\text{C}_{12}\text{H}_{19}\text{NNaO}_4$   $[\text{M}+\text{Na}]^+$  : 264.1206, found: 264.1201.

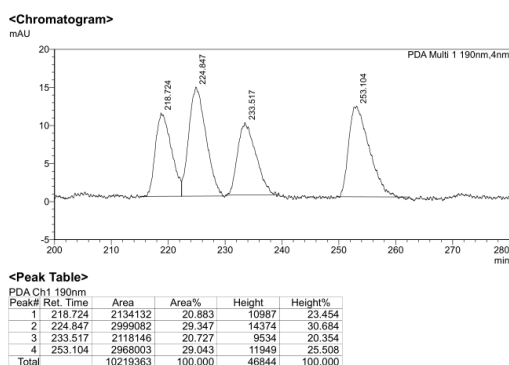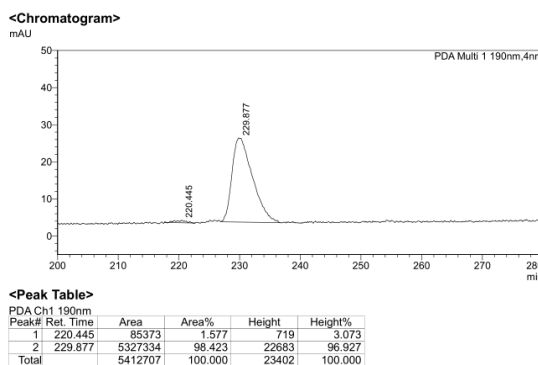

#### 4.21 Synthesis of ethyl (*R, E*)-4-((*R*)-2-oxo-5-phenyloxazolidin-3-yl)hex-2-enoate (**3ea**).

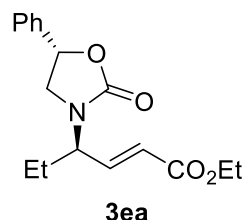

The general procedure was followed using **1e** (16.3 mg, 0.10 mmol) and **2a** (28.0 mg, 0.20 mmol). After purification by column chromatography (PE/EtOAc = 2:1), **3ea** (26.7 mg, 88%) was obtained as a colorless oil.  $[\alpha]_D^{22} = 1.0$  ( $c$  0.25, acetone);  $^1\text{H}$  NMR (400 MHz,  $\text{CDCl}_3$ )  $\delta$  7.45 – 7.31 (m, 5H), 6.85 (dd,  $J = 16.0, 6.0$  Hz, 1H), 5.97 (dd,  $J = 16.0, 1.6$  Hz, 1H), 5.58 – 5.49 (m, 1H), 4.52 – 4.42 (m, 1H), 4.21 (q,  $J = 7.2$  Hz,

2H), 3.84 (t,  $J = 8.8$  Hz, 1H), 3.33 (dd,  $J = 8.4, 7.6$  Hz, 1H), 1.72 – 1.57 (m, 2H), 1.30 (t,  $J = 7.2$  Hz, 3H), 0.92 (t,  $J = 7.2$  Hz, 3H);  $^{13}\text{C}$  NMR (100 MHz,  $\text{CDCl}_3$ )  $\delta$  165.92, 157.61, 144.22, 138.60, 128.99, 128.91, 125.41, 123.11, 74.81, 60.73, 55.24, 47.98, 24.18, 14.22, 10.55; Diastereoisomeric excess: 98%, determined by HPLC (Chiralpak ODH hexane/*i*-PrOH = 90/10; flow rate 0.8 ml/min; 25 °C; 254 nm), first peak:  $t_R = 20.5$  min, second peak:  $t_R = 23.4$  min; HRMS (ESI) calcd. for  $\text{C}_{17}\text{H}_{21}\text{NNaO}_4$   $[\text{M}+\text{Na}]^+$ : 326.1363, found: 326.1360.

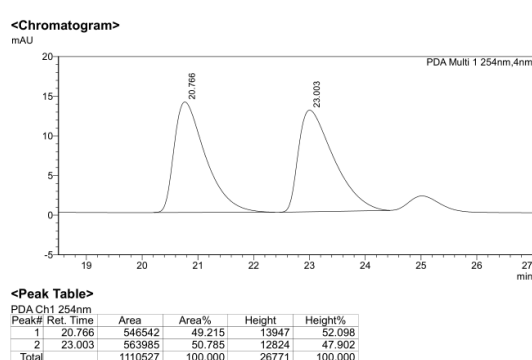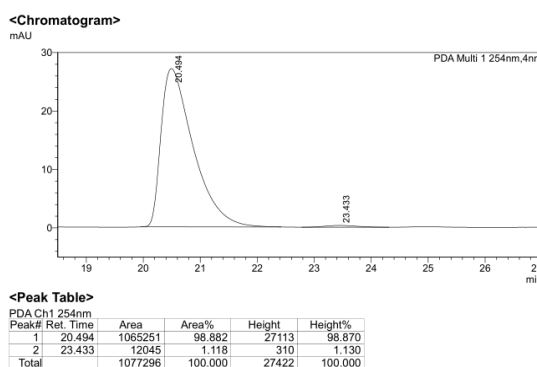

#### 4.22 Synthesis of ethyl (4*R,E*)-4-(5-methyl-2-oxooxazolidin-3-yl)hex-2-enoate (**3fa**).

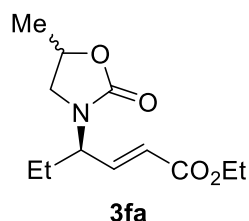

The general procedure was followed using **1f** (20.2 mg, 0.20 mmol) and **2a** (56.0 mg, 0.40 mmol). After purification by column chromatography (PE/EtOAc = 1:1), **3fa** (34.4 mg, 71%) was obtained as a colorless oil.  $[\alpha]_D^{25} = -18.6$  ( $c$  0.25, acetone);  $^1\text{H}$  NMR (400 MHz,  $\text{CDCl}_3$ )  $\delta$  6.80 (dd,  $J = 6.0, 3.6$  Hz, 1H), 6.77 (dd,  $J = 6.0, 3.6$  Hz, 1H), 5.92 (dd,  $J = 4.8, 1.6$  Hz, 1H), 5.88 (dd,  $J = 4.8, 1.6$  Hz, 1H), 4.71 – 4.59 (m, 2H), 4.42 – 4.32 (m, 2H), 4.18 (qd,  $J = 7.2, 1.6$  Hz, 4H), 3.54 (dd,  $J = 16.0, 8.4$  Hz, 2H), 3.06 – 2.97 (m, 2H), 1.72 – 1.59 (m, 4H), 1.43 (s, 3H), 1.41 (s, 3H), 1.27 (td,  $J = 7.2, 1.2$  Hz, 7H), 0.94 (td,  $J = 7.6, 2.4$  Hz, 7H);  $^{13}\text{C}$  NMR (100 MHz,  $\text{CDCl}_3$ )  $\delta$  165.93 (s), 157.72 (s), 144.33 (s), 144.02 (s), 123.29 (s), 122.95 (s), 70.49 (s), 70.36 (s), 60.66 (s), 55.08 (s), 55.00 (s), 46.94 (d,  $J = 1.7$  Hz), 24.30 (s), 24.17 (s), 20.77 (s), 20.66 (s),

14.18 (s), 10.55 (s); Diastereoisomeric ratio: 1: 1.1, enantiomeric excess: 97%, determined by HPLC (Chiralpak ID + ID hexane/*i*-PrOH = 95/5; flow rate 1.2 ml/min; 25 °C; 190 nm), first peak:  $t_R$  = 236.9 min, second peak:  $t_R$  = 243.9 min, third peak:  $t_R$  = 255.1 min, fourth peak:  $t_R$  = 279.0 min; HRMS (ESI) calcd. for C<sub>12</sub>H<sub>19</sub>NNaO<sub>4</sub> [M+Na]<sup>+</sup>: 264.1206, found: 264.1203.

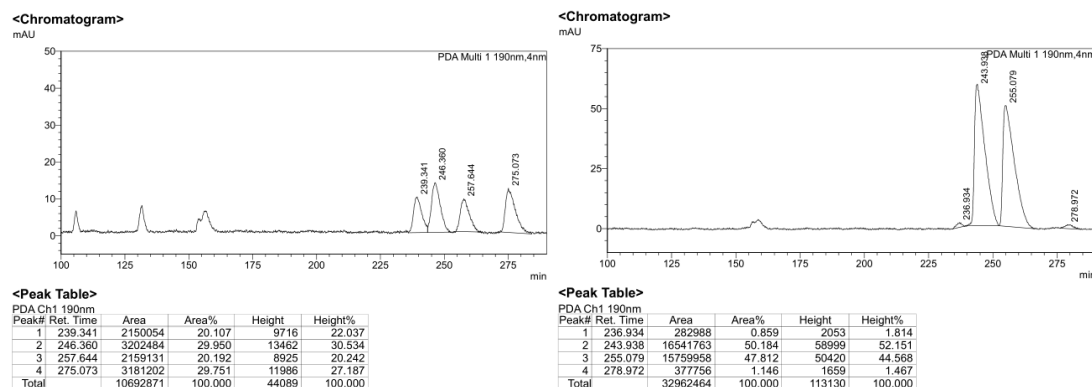

#### 4.23 Synthesis of ethyl (*R*, *E*)-4-(2-oxothiazolidin-3-yl)hex-2-enoate (**3ga**).

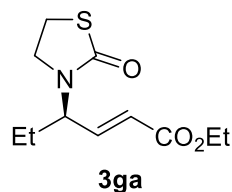

The general procedure was followed using **1g** (10.3 mg, 0.10 mmol) and **2a** (28.0 mg, 0.20 mmol). After purification by column chromatography (PE/EtOAc = 5:1), **3ga** (23.8 mg, 98%) was obtained as a colorless oil.  $[\alpha]_D^{22} = -7.1$  (*c* 0.25, acetone); <sup>1</sup>H NMR (400 MHz, CDCl<sub>3</sub>) δ 6.82 (dd, *J* = 15.6, 5.6 Hz, 1H), 5.92 (dd, *J* = 16.0, 1.6 Hz, 1H), 4.76 – 4.64 (m, 1H), 4.26 – 4.15 (m, 2H), 3.57 – 3.50 (m, 2H), 3.36 – 3.21 (m, 2H), 1.78 – 1.62 (m, 2H), 1.30 (t, *J* = 7.2 Hz, 3H), 0.96 (t, *J* = 7.2 Hz, 3H); <sup>13</sup>C NMR (100 MHz, CDCl<sub>3</sub>) δ 172.19, 165.95, 144.59, 122.98, 60.69, 55.44, 44.08, 26.03, 24.30, 14.21, 10.64; Enantiomeric excess: 97%, determined by HPLC (Chiralpak IE hexane/*i*-PrOH = 85/15; flow rate 0.6 ml/min; 25 °C; 254 nm), first peak:  $t_R$  = 28.7 min, second peak:  $t_R$  = 32.0 min. HRMS (ESI) calcd. for C<sub>11</sub>H<sub>17</sub>NNaO<sub>4</sub>S [M+Na]<sup>+</sup>: 266.0821, found: 266.0817.

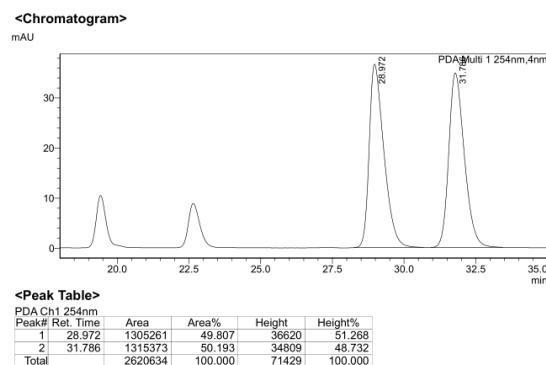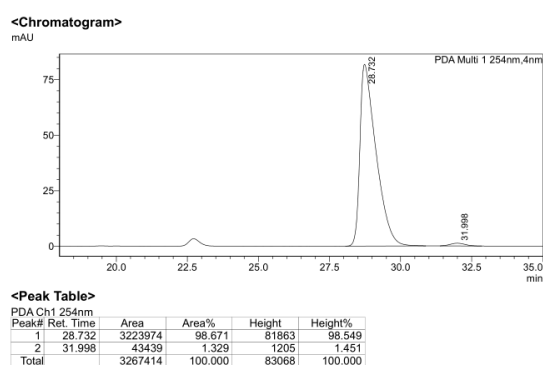

#### 4.24 Synthesis of ethyl (*R, E*)-4-(2-oxothiazolidin-3-yl)hept-2-enoate (**3gc**).

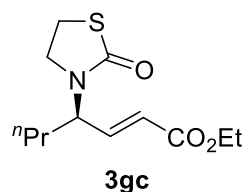

The general procedure was followed using **1g** (10.3 mg, 0.10 mmol) and **2c** (30.8 mg, 0.20 mmol). After purification by column chromatography (PE/EtOAc = 5:1), **3gc** (24.0 mg, 93%) was obtained as a colorless oil.  $[\alpha]_D^{22} = -6.2$  (*c* 0.10, acetone);  $^1\text{H}$  NMR (400 MHz,  $\text{CDCl}_3$ )  $\delta$  6.80 (dd,  $J = 16.0, 5.6$  Hz, 1H), 5.89 (dd,  $J = 16.0, 1.6$  Hz, 1H), 4.82 – 4.73 (m, 1H), 4.19 (q,  $J = 7.2$  Hz, 2H), 3.55 – 3.48 (m, 2H), 3.33 – 3.18 (m, 2H), 1.67 – 1.59 (m, 2H), 1.38 – 1.30 (m, 2H), 1.28 (t,  $J = 7.2$  Hz, 3H), 0.94 (t,  $J = 7.6$  Hz, 3H);  $^{13}\text{C}$  NMR (100 MHz,  $\text{CDCl}_3$ )  $\delta$  172.03, 165.96, 144.81, 122.88, 60.67, 53.62, 44.13, 33.16, 26.01, 19.26, 14.21, 13.63; Enantiomeric excess: 96%, determined by HPLC (Chiralpak IF hexane/*i*-PrOH = 85/15; flow rate 0.6 ml/min; 25 °C; 254 nm), first peak:  $t_R = 22.3$  min, second peak:  $t_R = 24.9$  min. HRMS (ESI) calcd. for  $\text{C}_{12}\text{H}_{19}\text{NNaO}_3\text{S}$   $[\text{M}+\text{Na}]^+$ : 280.0978, found: 280.0979.

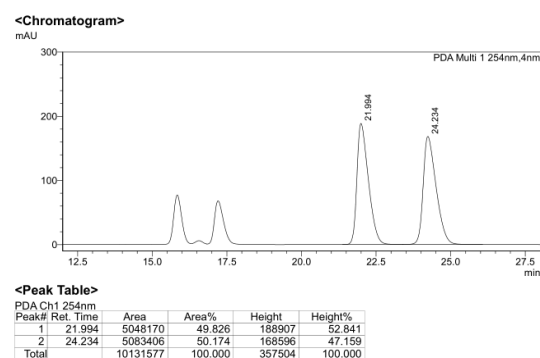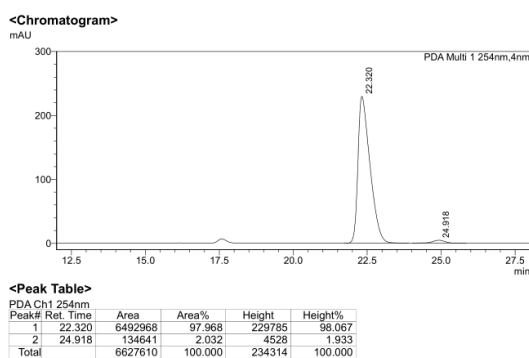



#### 4.25 Synthesis of ethyl (*R, E*)-4-(2-oxothiazolidin-3-yl)tetradec-2-enoate (**3gd**).

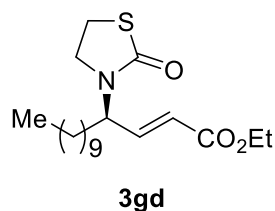

The general procedure was followed using **1g** (10.3 mg, 0.10 mmol) and **2d** (50.5 mg, 0.20 mmol). After purification by column chromatography (PE/EtOAc = 5:1), **3gd** (35.2 mg, 99%) was obtained as a colorless oil.  $[\alpha]_D^{22} = -5.0$  ( $c$  0.25, acetone);  $^1\text{H}$  NMR (400 MHz,  $\text{CDCl}_3$ )  $\delta$  6.79 (dd,  $J = 16.0, 5.6$  Hz, 1H), 5.89 (d,  $J = 16.0$  Hz, 1H), 4.79 – 4.70 (m, 1H), 4.18 (q,  $J = 7.2$  Hz, 2H), 3.51 (t,  $J = 7.2$  Hz, 2H), 3.31 – 3.18 (m, 2H), 1.67 – 1.54 (m, 2H), 1.33 – 1.19 (m, 19H), 0.86 (t,  $J = 7.2$  Hz, 3H);  $^{13}\text{C}$  NMR (100 MHz,  $\text{CDCl}_3$ )  $\delta$  172.00, 165.95, 144.83, 122.85, 60.65, 53.93, 44.14, 31.87, 31.11, 29.52 (d,  $J = 3.2$  Hz), 29.39, 29.27, 29.15, 26.00 (d,  $J = 3.5$  Hz), 22.65, 14.20, 14.08; Enantiomeric excess: 96%, determined by HPLC (Chiralpak IF hexane/*i*-PrOH = 85/15; flow rate 0.6 ml/min; 25 °C; 254 nm), first peak:  $t_R = 19.1$  min, second peak:  $t_R = 20.6$  min. HRMS (ESI) calcd. for  $\text{C}_{19}\text{H}_{33}\text{NNaO}_4\text{S}$   $[\text{M}+\text{Na}]^+$ : 378.2073 found: 378.2065.

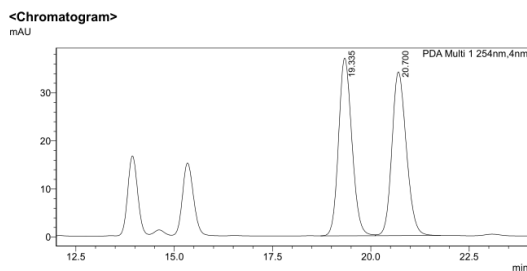

<Peak Table>

| Peak# | Ret. Time | Area    | Area%   | Height | Height% |
|-------|-----------|---------|---------|--------|---------|
| 1     | 19.335    | 870335  | 50.004  | 36956  | 52.050  |
| 2     | 20.700    | 870186  | 49.996  | 34045  | 47.950  |
| Total |           | 1740522 | 100.000 | 71001  | 100.000 |

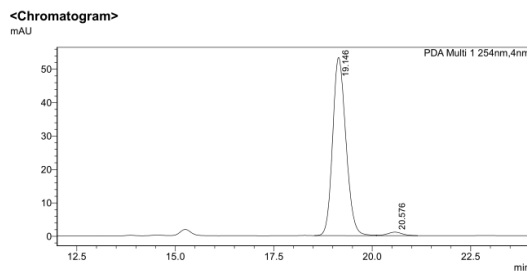

<Peak Table>

| Peak# | Ret. Time | Area    | Area%   | Height | Height% |
|-------|-----------|---------|---------|--------|---------|
| 1     | 19.146    | 1252255 | 97.868  | 53339  | 98.088  |
| 2     | 20.576    | 27274   | 2.132   | 1040   | 1.912   |
| Total |           | 1279529 | 100.000 | 54378  | 100.000 |

#### 4.26 Synthesis of ethyl (*R, E*)-5-methyl-4-(2-oxothiazolidin-3-yl)hex-2-enoate (**3ge**).

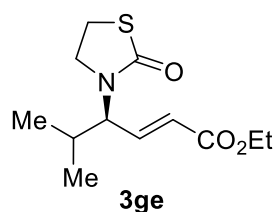

The general procedure was followed using **1g** (10.3 mg, 0.10 mmol) and **2e** (30.8 mg, 0.20 mmol). After purification by column chromatography (PE/EtOAc = 5:1), **3ge** (22.0 mg, 85%) was obtained as a colorless oil.  $[\alpha]_D^{22} = -3.6$  ( $c$  0.25, acetone);  $^1\text{H}$  NMR (400 MHz,  $\text{CDCl}_3$ )  $\delta$  6.84 (dd,  $J = 15.6, 7.6$  Hz, 1H), 5.97 (dd,  $J = 15.6, 1.2$  Hz, 1H), 4.37 – 4.28 (m, 1H), 4.20 (q,  $J = 7.2$  Hz, 2H), 3.61 – 3.52 (m, 2H), 3.27 (t,  $J = 7.2$  Hz, 2H), 1.98 – 1.86 (m, 1H), 1.29 (t,  $J = 7.2$  Hz, 3H), 0.96 (dd,  $J = 6.4, 4.0$  Hz, 6H);  $^{13}\text{C}$  NMR (100 MHz,  $\text{CDCl}_3$ )  $\delta$  172.05, 166.01, 142.89, 124.71, 60.80, 60.70, 44.69, 29.64, 26.14, 19.83, 19.45, 14.21; Enantiomeric excess: 91%, determined by HPLC (Chiralpak IF hexane/*i*-PrOH = 85/15; flow rate 0.6 ml/min; 25 °C; 254 nm), first peak:  $t_R = 19.3$  min, second peak:  $t_R = 21.3$  min. HRMS (ESI) calcd. for  $\text{C}_{12}\text{H}_{19}\text{NNaO}_3\text{S}$   $[\text{M}+\text{Na}]^+$ : 280.0978, found: 280.0976.

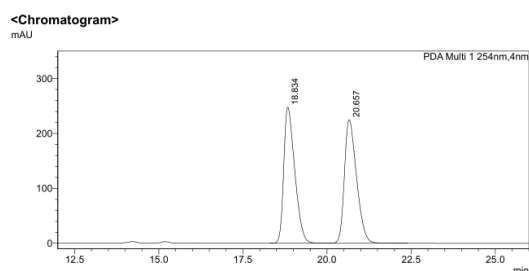

| Peak# | Ret. Time | Area     | Area%   | Height | Height% |
|-------|-----------|----------|---------|--------|---------|
| 1     | 18.834    | 5644547  | 49.963  | 247900 | 52.392  |
| 2     | 20.657    | 5652889  | 50.037  | 225261 | 47.608  |
| Total |           | 11297436 | 100.000 | 473162 | 100.000 |

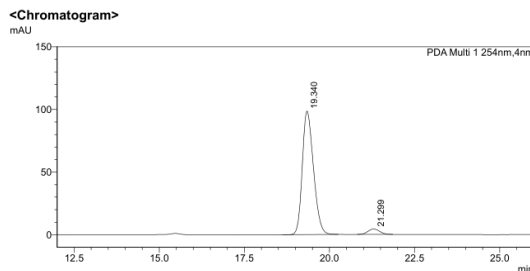

| Peak# | Ret. Time | Area    | Area%   | Height | Height% |
|-------|-----------|---------|---------|--------|---------|
| 1     | 19.340    | 2250100 | 95.509  | 98634  | 95.779  |
| 2     | 21.299    | 105803  | 4.491   | 4347   | 4.221   |
| Total |           | 2355903 | 100.000 | 102981 | 100.000 |

#### 4.27 Synthesis of ethyl (*R*, *E*)-4-(2-oxothiazolidin-3-yl)-6-phenylhex-2-enoate (**3gf**).

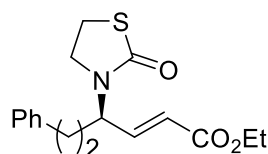

**3gf**

The general procedure was followed using **1g** (10.3 mg, 0.10 mmol) and **2f** (43.3 mg, 0.20 mmol). After purification by column chromatography (PE/EtOAc = 5:1), **3gf** (30.3 mg, 95%) was obtained as a colorless oil.  $[\alpha]_D^{22} = -14.2$  ( $c$  0.25, acetone);  $^1\text{H}$  NMR (400 MHz,  $\text{CDCl}_3$ )  $\delta$  7.32 – 7.25 (m, 2H), 7.23 – 7.14 (m, 3H), 6.83 (dd,  $J = 15.6, 5.6$  Hz, 1H), 5.93 (d,  $J = 16.0$  Hz, 1H), 4.83 (dd,  $J = 14.0, 6.8$  Hz, 1H), 4.20 (q,  $J = 7.2$  Hz, 2H), 3.57 – 3.45 (m, 2H), 3.31 – 3.11 (m, 2H), 2.74 – 2.57 (m, 2H), 2.00

(q,  $J = 7.6$  Hz, 2H), 1.29 (t,  $J = 7.2$  Hz, 3H);  $^{13}\text{C}$  NMR (100 MHz,  $\text{CDCl}_3$ )  $\delta$  172.15, 165.85, 144.28, 140.54, 128.60, 128.31, 126.32, 123.30, 60.73, 53.88, 44.30, 32.80, 32.45, 25.94, 14.21; Enantiomeric excess: 95%, determined by HPLC (Chiralpak IF hexane/*i*-PrOH = 85/15; flow rate 0.6 ml/min; 25 °C; 254 nm), first peak:  $t_R = 36.8$  min, second peak:  $t_R = 42.4$  min. HRMS (ESI) calcd. for  $\text{C}_{17}\text{H}_{21}\text{NNaO}_3\text{S}$   $[\text{M}+\text{Na}]^+$ : 342.1143, found: 342.1128.

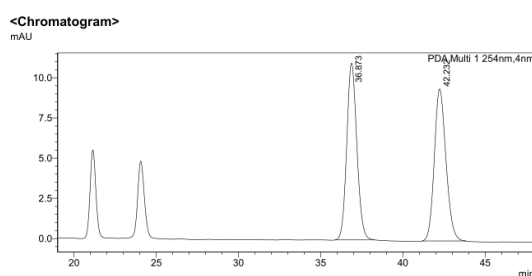

<Peak Table>

| Peak# | Ret. Time | Area   | Area%   | Height | Height% |
|-------|-----------|--------|---------|--------|---------|
| 1     | 36.873    | 466598 | 50.124  | 11009  | 53.786  |
| 2     | 42.232    | 466281 | 49.876  | 9460   | 46.214  |
| Total |           | 934878 | 100.000 | 20469  | 100.000 |

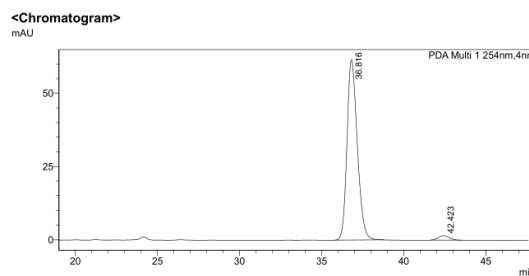

<Peak Table>

| Peak# | Ret. Time | Area    | Area%   | Height | Height% |
|-------|-----------|---------|---------|--------|---------|
| 1     | 36.816    | 2679980 | 97.469  | 61509  | 97.624  |
| 2     | 42.423    | 69585   | 2.531   | 1497   | 2.376   |
| Total |           | 2749565 | 100.000 | 63006  | 100.000 |

#### 4.28 Synthesis of 1-ethyl 8-methyl (*R*, *E*)-4-(2-oxothiazolidin-3-yl)oct-2-enedioate (**3gg**).

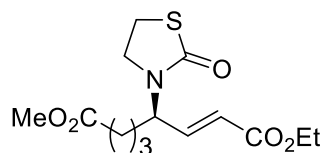

**3gg**

The general procedure was followed using **1g** (10.3 mg, 0.10 mmol) and **2g** (42.4 mg, 0.20 mmol). After purification by column chromatography (PE/EtOAc = 2:1), **3gg** (30.2 mg, 96%) was obtained as a colorless oil.  $[\alpha]_D^{22} = 6.2$  ( $c$  0.10, acetone);  $^1\text{H}$  NMR (400 MHz,  $\text{CDCl}_3$ )  $\delta$  6.78 (dd,  $J = 16.0, 5.6$  Hz, 1H), 5.90 (dd,  $J = 15.6, 1.6$  Hz, 1H), 4.80 – 4.72 (m, 1H), 4.18 (q,  $J = 6.8$  Hz, 2H), 3.65 (s, 3H), 3.62 – 3.46 (m, 2H), 3.31 – 3.22 (m, 2H), 2.45 – 2.26 (m, 2H), 1.74 – 1.56 (m, 4H), 1.27 (t,  $J = 7.2$  Hz, 3H);  $^{13}\text{C}$  NMR (100 MHz,  $\text{CDCl}_3$ )  $\delta$  173.47, 172.26, 165.82, 144.30, 123.19, 60.72, 53.52, 51.63, 44.04, 33.00, 30.33, 26.01, 21.17, 14.20; Enantiomeric excess: 95%, determined by HPLC (Chiralpak IF hexane/*i*-PrOH = 92/08; flow rate 1.0 ml/min; 25 °C; 190 nm), first peak:  $t_R = 83.6$  min, second peak:  $t_R = 89.3$  min. HRMS (ESI) calcd. for  $\text{C}_{14}\text{H}_{21}\text{NNaO}_3\text{S}$   $[\text{M}+\text{Na}]^+$ : 338.1033, found: 338.1027.

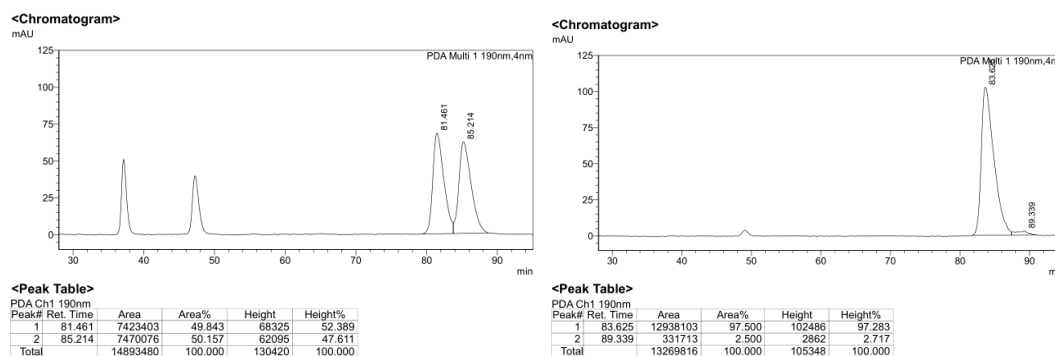

#### 4. General procedure for cascade reaction of other *N*-centered nucleophiles:

##### 5.1 General procedure for variation of pyrrolidine-2,5-diones components

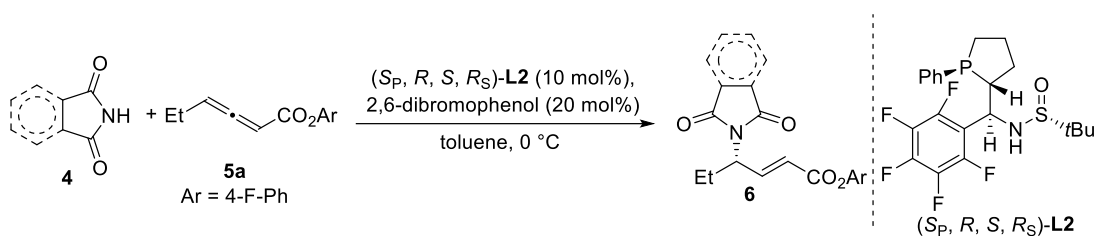

To a flame-dried glass tube with a magnetic stirring bar were added **3a,4,7,7a-tetrahydro-1H-isoinidole-1,3(2H)-dione 4a** (14.7 mg, 0.10 mmol), 2,6-dibromophenol (5.1 mg, 0.02 mmol) and (*S<sub>P</sub>*, *R*, *S*, *R<sub>S</sub>*)-**L2** (4.6 mg, 0.01 mmol), followed by the addition of dry toluene (1.5 mL).<sup>[5]</sup> The above mixture was cooled to 0 °C, and then the allenolate **5a** (0.20 mmol) was slowly added via syringe at 0 °C under inert atmosphere. The reaction mixture was stirred at 0 °C for 12 h, and TLC show that the reaction was completed. Then, the reaction system was warmed to room temperature, and toluene was removed under reduced pressure. The residue was purified by column chromatography on silica gel (petroleum ether/ethyl acetate = 6:1) to afford **6aa** (32.0 mg, 90% yield).

##### 5.1.1 4-fluorophenyl (4*S*, *E*)-4-(1,3-dioxo-1,3,3a,4,7,7a-hexahydro-2H-isoinidol-2-yl)hex-2-enoate (**6aa**).

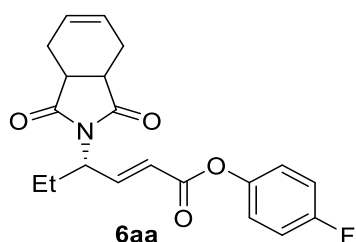

The general procedure was followed using **4a** (0.10 mmol) and **5a** (0.20 mmol). After purification by column chromatography (PE/EtOAc = 6:1), **6aa** (32.0 mg, 90%) was obtained as a colorless oil.  $[\alpha]_D^{22} = -4.8$  ( $c$  0.25, acetone);  $^1\text{H}$  NMR (400 MHz,  $\text{CDCl}_3$ )  $\delta$  7.21 (dd,  $J = 16.0, 6.4$  Hz, 1H), 7.05 (d,  $J = 6.0$  Hz, 4H), 5.99 (dd,  $J = 15.6, 1.6$  Hz, 1H), 5.96 – 5.92 (m, 2H), 4.75 – 4.64 (m, 1H), 3.17 – 3.05 (m, 2H), 2.70 – 2.58 (m, 2H), 2.23 (dd,  $J = 14.8, 6.8$  Hz, 2H), 2.17 – 2.02 (m, 1H), 1.95 – 1.82 (m, 1H), 0.86 (t,  $J = 7.6$  Hz, 3H);  $^{13}\text{C}$  NMR (100 MHz,  $\text{CDCl}_3$ )  $\delta$  179.61 (d,  $J = 6.5$  Hz), 164.15, 161.38, 158.95, 146.31 (d,  $J = 2.8$  Hz), 146.20, 127.97, 122.87 (d,  $J = 8.4$  Hz), 121.76, 116.11, 115.88, 54.11, 38.95 (d,  $J = 12.3$  Hz), 23.76, 23.60 (d,  $J = 2.5$  Hz), 10.66; Enantiomeric excess: 92%, determined by HPLC (Chiralpak IC hexane/*i*-PrOH = 90/10; flow rate 0.8 ml/min; 25 °C; 210 nm), first peak:  $t_R = 28.4$  min, second peak:  $t_R = 38.6$  min. HRMS (ESI) calcd. for  $\text{C}_{20}\text{H}_{20}\text{FNNaO}_4$   $[\text{M}+\text{Na}]^+$  : 380.1269, found: 380.1268.

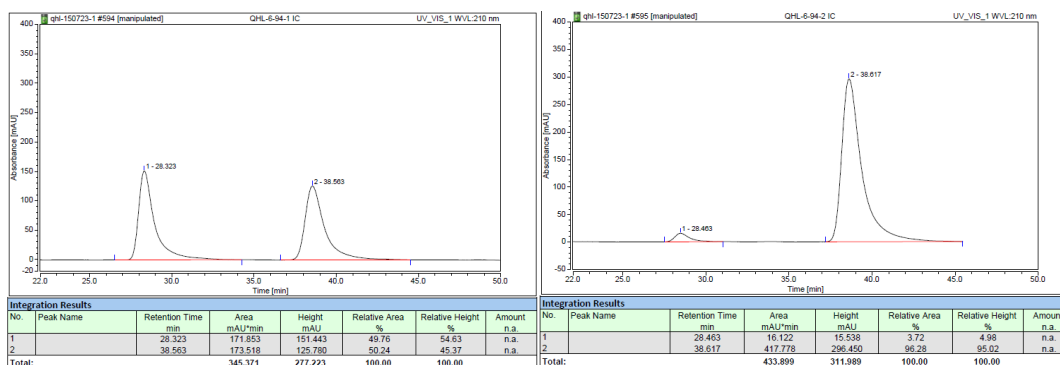

### 5.1.2 4-fluorophenyl (4*S*, *E*)-4-(5,6-dimethyl-1,3-dioxo-1,3,3a,4,7,7a-hexahydro-2H-isoindol-2-yl)hex-2-enoate (**6ba**).

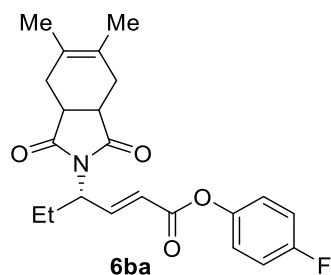

The general procedure was followed using **4b** (0.10 mmol) and **5a** (0.20 mmol). After purification by column chromatography (PE/EtOAc = 5:1), **6ba** (27.7 mg, 72%) was obtained.  $[\alpha]_D^{22} = -9.2$  (*c* 0.25, acetone);  $^1\text{H}$  NMR (400 MHz,  $\text{CDCl}_3$ )  $\delta$  7.18 (dd,  $J = 16.0, 6.0$  Hz, 1H), 7.05 (d,  $J = 6.4$  Hz, 4H), 5.88 (dd,  $J = 15.6, 1.6$  Hz, 1H), 4.73 – 4.61 (m, 1H), 3.12 – 3.00 (m, 2H), 2.49 (dd,  $J = 14.8, 5.2$  Hz, 2H), 2.24 (d,  $J = 14.0$  Hz, 2H), 2.18 – 2.02 (m, 1H), 1.93 – 1.81 (m, 1H), 1.69 (s, 6H), 0.84 (t,  $J = 7.6$  Hz, 3H);  $^{13}\text{C}$  NMR (100 MHz,  $\text{CDCl}_3$ )  $\delta$  179.80 (d,  $J = 9.9$  Hz), 164.16, 161.41, 158.99, 146.48, 146.34 (d,  $J = 2.9$  Hz), 127.44, 127.23, 122.86 (d,  $J = 8.5$  Hz), 121.20, 116.16, 115.92, 54.02, 39.77 (d,  $J = 11.7$  Hz), 30.86 (d,  $J = 5.9$  Hz), 23.47, 19.22 (d,  $J = 3.2$  Hz), 10.31; Enantiomeric excess: 88%, determined by HPLC (Chiralpak IC, hexane /*i*-PrOH = 90/10; flow rate 1.0 ml/min; 25 °C; 254 nm), first peak:  $t_R = 13.4$  min, second peak:  $t_R = 17.7$  min. HRMS (ESI) calcd. for  $\text{C}_{22}\text{H}_{24}\text{FNNaO}_4$   $[\text{M}+\text{Na}]^+$ : 408.1582, found: 408.1581.

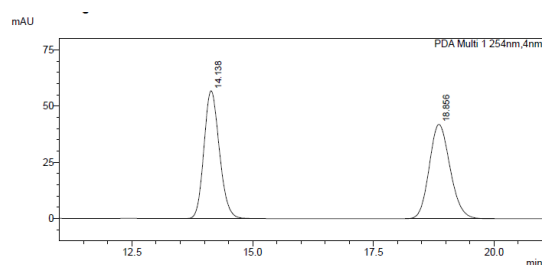

<Peak Table>

| Peak# | Ret. Time | Area    | Area%   | Height | Height% |
|-------|-----------|---------|---------|--------|---------|
| 1     | 14.138    | 1260368 | 50.007  | 56798  | 57.506  |
| 2     | 18.856    | 1259995 | 49.993  | 41972  | 42.494  |
| Total |           | 2520363 | 100.000 | 98770  | 100.000 |

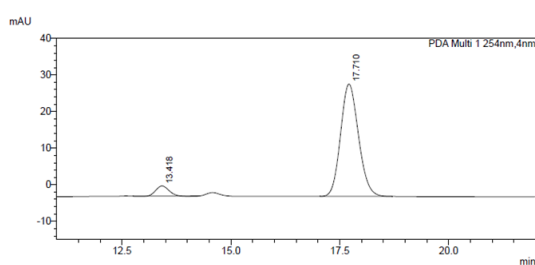

| Peak# | Ret. Time | Area   | Area%   | Height | Height% |
|-------|-----------|--------|---------|--------|---------|
| 1     | 13.418    | 55849  | 5.974   | 2774   | 8.285   |
| 2     | 17.710    | 879037 | 94.026  | 30709  | 91.715  |
| Total |           | 934885 | 100.000 | 33483  | 100.000 |

### 5.1.3 4-fluorophenyl (4*S*, *E*)-4-(4,7-dimethyl-1,3-dioxo-1,3,3a,4,7,7a-hexahydro-2H-isoindol-2-yl)hex-2-enoate (**6ca**).

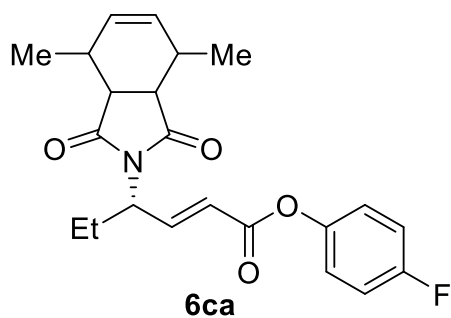

The general procedure was followed using **4c** (0.10 mmol) and **5a** (0.20 mmol). After purification by column chromatography (PE/EtOAc = 6:1), **6ca** (31.6 mg, 82%) was obtained.  $[\alpha]_D^{22} = 2.8$  ( $c$  0.25, acetone);  $^1\text{H}$  NMR (400 MHz,  $\text{CDCl}_3$ )  $\delta$  7.19 (dd,  $J = 16.0, 6.4$  Hz, 1H), 7.08 – 7.01 (m, 4H), 5.98 (dd,  $J = 16.0, 1.6$  Hz, 1H), 5.78 – 5.69 (m, 2H), 4.70 – 4.60 (m, 1H), 3.02 (p,  $J = 8.4$  Hz, 2H), 2.50 – 2.39 (m, 2H), 2.13 – 2.01 (m, 1H), 1.92 – 1.80 (m, 1H), 1.46 (dd,  $J = 7.6, 2.0$  Hz, 6H), 0.85 (t,  $J = 7.2$  Hz, 3H);  $^{13}\text{C}$  NMR (100 MHz,  $\text{CDCl}_3$ )  $\delta$  177.14 (d,  $J = 13.8$  Hz), 164.23, 161.41, 158.98, 146.63, 146.36 (d,  $J = 2.8$  Hz), 134.33, 122.91 (d,  $J = 8.4$  Hz), 121.59, 116.13, 115.90, 53.63, 45.39 (d,  $J = 19.6$  Hz), 31.03, 23.64, 16.71, 10.73; Enantiomeric excess: 90%, determined by HPLC (Chiralpak IC, hexane/*i*-PrOH = 80/20; flow rate 0.8 ml/min; 25 °C; 254 nm), first peak:  $t_R = 12.7$  min, second peak:  $t_R = 13.8$  min. HRMS (ESI) calcd. for  $\text{C}_{22}\text{H}_{24}\text{FNNaO}_4$   $[\text{M}+\text{Na}]^+$ : 408.1582, found: 408.1584.

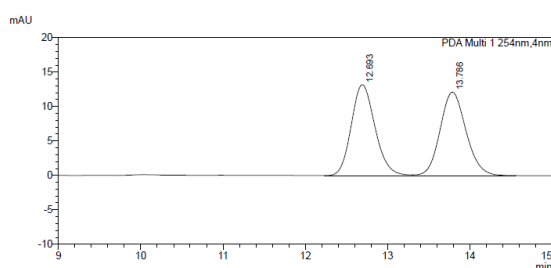

<Peak Table>

| Peak# | Ret. Time | Area   | Area%   | Height | Height% |
|-------|-----------|--------|---------|--------|---------|
| 1     | 12.693    | 265418 | 49.948  | 13213  | 52.156  |
| 2     | 13.786    | 265971 | 50.052  | 12121  | 47.844  |
| Total |           | 531390 | 100.000 | 25333  | 100.000 |

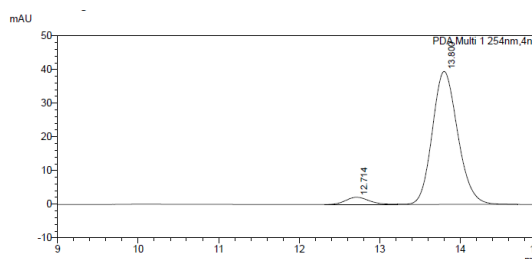

<Peak Table>

| Peak# | Ret. Time | Area   | Area%   | Height | Height% |
|-------|-----------|--------|---------|--------|---------|
| 1     | 12.714    | 43225  | 4.749   | 2147   | 5.156   |
| 2     | 13.800    | 866947 | 95.251  | 39493  | 94.844  |
| Total |           | 910172 | 100.000 | 41640  | 100.000 |

#### 5.1.4 4-fluorophenyl (4*S*, *E*)-4-(1,3-dioxoctahydro-2*H*-isoindol-2-yl)hex-2-enoate (**6da**).

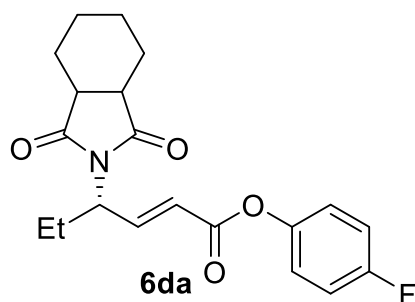

The general procedure was followed using **4d** (0.10 mmol) and **5a** (0.20 mmol). After purification by column chromatography (PE/EtOAc = 6:1), **6da** (30.2 mg, 84%) was obtained.  $[\alpha]_D^{22} = 14.8$  ( $c$  0.25, acetone);  $^1\text{H}$  NMR (400 MHz,  $\text{CDCl}_3$ )  $\delta$  7.27 (dd,  $J = 14.0, 6.8$  Hz, 1H), 7.13 – 6.99 (m, 4H), 6.06 (d,  $J = 16.0$  Hz, 1H), 4.70 (dd,  $J = 15.2, 7.2$  Hz, 1H), 2.96 – 2.82 (m, 2H), 2.18 – 2.06 (m, 1H), 2.03 – 1.93 (m, 1H), 1.93 – 1.83 (m, 2H), 1.83 – 1.69 (m, 2H), 1.55 – 1.38 (m, 4H), 0.93 (t,  $J = 7.2$  Hz, 3H);  $^{13}\text{C}$  NMR (100 MHz,  $\text{CDCl}_3$ )  $\delta$  179.16 (d,  $J = 4.1$  Hz), 164.16, 161.42, 159.00, 146.35, 146.31, 122.90 (d,  $J = 8.5$  Hz), 122.11, 116.15, 115.92, 53.54, 39.70, 23.99, 23.88, 21.74 (d,  $J = 0.8$  Hz), 10.83; Enantiomeric excess: 91%, determined by HPLC (Chiralpak IC, hexane/*i*-PrOH = 90/10; flow rate 0.8 ml/min; 25 °C; 210 nm), first peak:  $t_R = 24.2$  min, second peak:  $t_R = 35.4$  min. HRMS (ESI) calcd. for  $\text{C}_{20}\text{H}_{22}\text{FNNaO}_4$   $[\text{M}+\text{Na}]^+$ : 382.1425, found: 382.1433.

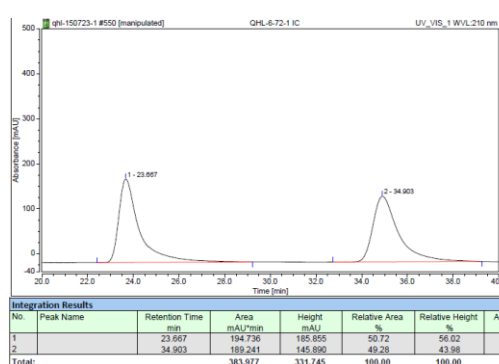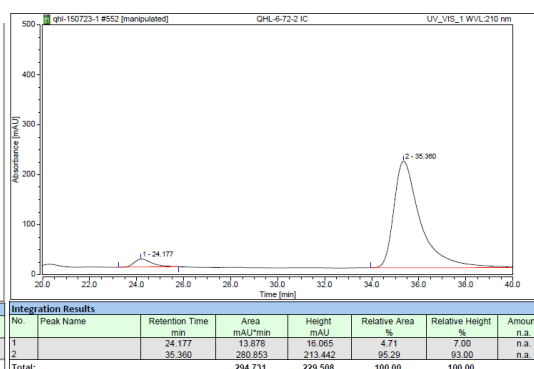

### 5.1.5 4-Fluorophenyl (4*S*, *E*)-4-(1,3-dioxohexahydrocyclopenta[*c*]pyrrol-2(1*H*)-yl)hex-2-enoate (**6ea**).



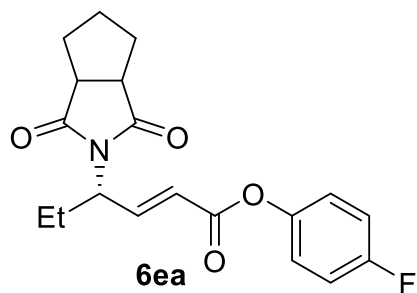

The general procedure was followed using **4e** (0.10 mmol) and **5a** (0.20 mmol). After purification by column chromatography (PE/EtOAc = 6:1), **6ea** (29.5 mg, 85%) was obtained.  $[\alpha]_D^{22} = 12.4$  (*c* 0.25, acetone);  $^1\text{H}$  NMR (400 MHz,  $\text{CDCl}_3$ )  $\delta$  7.25 (dd, *J* = 16.0, 6.8 Hz, 1H), 7.10 – 7.02 (m, 4H), 6.03 (dd, *J* = 16.0, 1.2 Hz, 1H), 4.69 (q, *J* = 7.2 Hz, 1H), 3.17 (p, *J* = 8.7 Hz, 2H), 2.19 – 2.14 (m, 2H), 2.12 – 2.04 (m, 1H), 1.99 – 1.85 (m, 3H), 1.81 (dt, *J* = 19.2, 6.8 Hz, 1H), 1.38 – 1.28 (m, 1H), 0.88 (t, *J* = 7.2 Hz, 3H);  $^{13}\text{C}$  NMR (100 MHz,  $\text{CDCl}_3$ )  $\delta$  177.17 (d, *J* = 9.3 Hz), 164.18, 161.38, 158.96, 146.31, 146.28, 134.72 (d, *J* = 7.0 Hz), 122.88 (d, *J* = 8.5 Hz), 122.08, 116.13, 115.90, 53.77, 52.28, 45.57 (d, *J* = 11.3 Hz), 45.04 (d, *J* = 2.1 Hz), 23.82, 10.86; Enantiomeric excess: 90%, determined by HPLC (Chiralpak IC, hexane/*i*-PrOH = 90/10; flow rate 0.8 ml/min; 25 °C; 210 nm), first peak: *t*<sub>R</sub> = 31.8 min, second peak: *t*<sub>R</sub> = 48.8 min. HRMS (ESI) calcd. for  $\text{C}_{19}\text{H}_{20}\text{FNNaO}_4$   $[\text{M}+\text{Na}]^+$  : 368.1269, found: 368.1266.

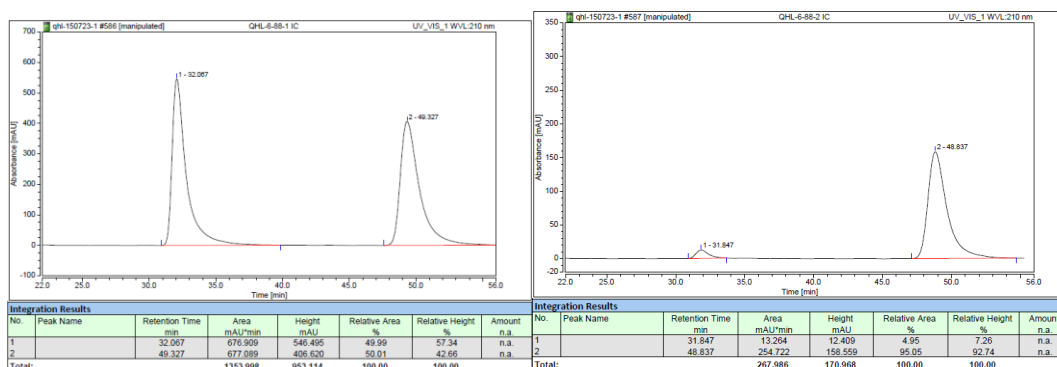

### 5.1.6 4-fluorophenyl (4*S*, *E*)-4-((3*aR*,7*aS*)-1,3-dioxooctahydro-2*H*-4,7-methanoiso-indol-2-yl)hex-2-enoate (**6fa**).

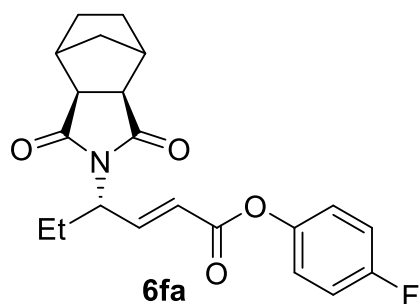

The general procedure was followed using **4f** (0.10 mmol) and **5a** (0.20 mmol). After purification by column chromatography (PE/EtOAc = 4:1), **6fa** (34.0 mg, 91%) was obtained.  $[\alpha]_D^{22} = 20.0$  ( $c$  0.25, acetone);  $^1\text{H}$  NMR (400 MHz,  $\text{CDCl}_3$ )  $\delta$  7.25 (dd,  $J = 16.0, 7.6$  Hz, 1H), 7.09 – 6.99 (m, 4H), 6.06 (dd,  $J = 15.6, 1.2$  Hz, 1H), 4.66 (q,  $J = 7.2$  Hz, 1H), 2.72 (s, 2H), 2.64 – 2.58 (m, 2H), 2.00 (pd,  $J = 14.2, 7.4$  Hz, 2H), 1.67 (d,  $J = 8.0$  Hz, 2H), 1.34 (dd,  $J = 9.6, 2.0$  Hz, 2H), 1.25 (dd,  $J = 12.8, 3.2$  Hz, 1H), 1.15 (d,  $J = 11.2$  Hz, 1H), 0.90 (t,  $J = 7.6$  Hz, 3H);  $^{13}\text{C}$  NMR (100 MHz,  $\text{CDCl}_3$ )  $\delta$  178.38 (d,  $J = 3.0$  Hz), 164.11, 161.38, 158.95, 146.27 (d,  $J = 2.9$  Hz), 146.02, 122.87 (d,  $J = 8.4$  Hz), 122.45, 116.12, 115.89, 54.03, 48.38 (d,  $J = 5.0$  Hz), 39.80, 33.27, 27.96 (d,  $J = 6.2$  Hz), 23.91, 10.92; Enantiomeric excess: 90%, determined by HPLC (Chiralpak IC, hexane/*i*-PrOH = 90/10; flow rate 0.8 ml/min; 25 °C; 210 nm), first peak:  $t_R = 27.9$  min, second peak:  $t_R = 36.0$  min. HRMS (ESI) calcd. for  $\text{C}_{21}\text{H}_{22}\text{FNNaO}_4$   $[\text{M}+\text{Na}]^+$ : 394.1425, found: 394.1424.

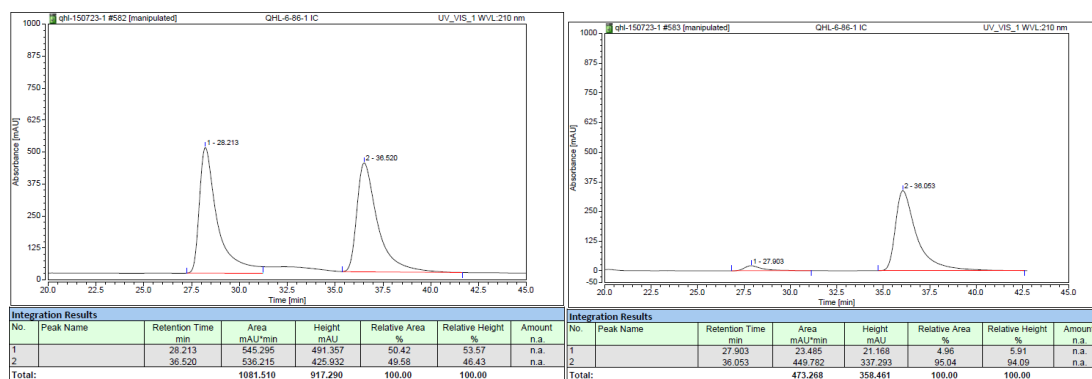

### 5.1.7 4-fluorophenyl (4*S*, *E*)-4-((3*aR*,7*aS*)-1,3-dioxo-1,3,3*a*,4,7,7*a*-hexahydro-2*H*-4,7- methanoisindol-2-yl)hex-2-enoate (**6ga**).

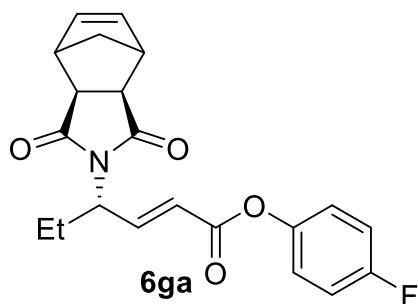

The general procedure was followed using **4g** (0.10 mmol) and **5a** (0.20 mmol). After purification by column chromatography (PE/EtOAc = 4:1), **6ga** (28.4 mg, 77%) was obtained.  $[\alpha]_D^{22} = 20.0$  ( $c$  0.25, acetone);  $^1\text{H}$  NMR (400 MHz,  $\text{CDCl}_3$ )  $\delta$  7.16 (dd,  $J = 16.0, 6.8$  Hz, 1H), 7.11 – 7.00 (m, 4H), 6.15 (s, 2H), 6.01 (dd,  $J = 16.0, 1.2$  Hz, 1H), 4.54 (q,  $J = 7.2$  Hz, 1H), 3.41 (s, 2H), 3.35 – 3.23 (m, 2H), 2.03 – 1.80 (m, 2H), 1.74 (d,  $J = 8.8$  Hz, 1H), 1.54 (d,  $J = 8.8$  Hz, 1H), 0.87 (t,  $J = 7.6$  Hz, 3H);  $^{13}\text{C}$  NMR (100 MHz,  $\text{CDCl}_3$ )  $\delta$  179.83, 164.14, 161.39, 158.97, 146.28 (d,  $J = 2.9$  Hz), 146.18, 122.88 (d,  $J = 8.5$  Hz), 122.11, 116.14, 115.90, 54.02, 44.95 (d,  $J = 15.3$  Hz), 30.58 (d,  $J = 2.1$  Hz), 24.80, 23.80, 10.74; Enantiomeric excess: 91%, determined by HPLC (Chiralpak OD-H, hexane/*i*-PrOH = 90/10; flow rate 0.8 ml/min; 25 °C; 210 nm), first peak:  $t_R = 21.7$  min, second peak:  $t_R = 28.3$  min. HRMS (ESI) calcd. for  $\text{C}_{21}\text{H}_{20}\text{FNNaO}_4$   $[\text{M}+\text{Na}]^+$ : 392.1269, found: 392.1267.

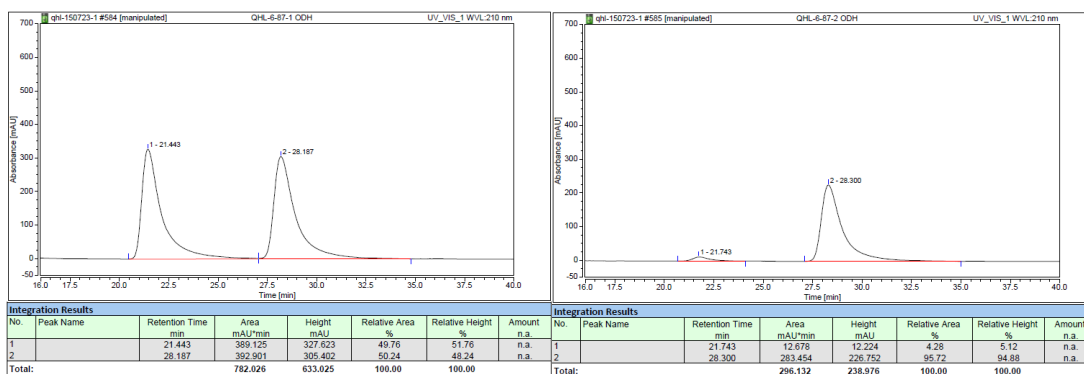

#### 5.1.8 4-fluorophenyl (4*S*, *E*)-4-((3*aR*,7*aS*)-1,3-dioxo-1,3,3*a*,4,7,7*a*-hexahydro-2*H*-4,7-epoxyisoindol-2-yl)hex-2-enoate (**6ha**).

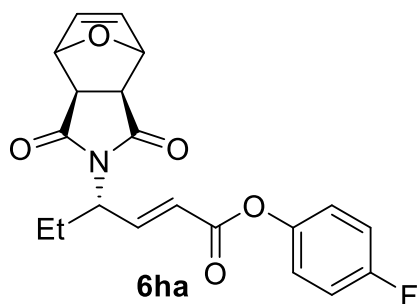

The general procedure was followed using **4h** (0.10 mmol) and **5a** (0.20 mmol). After purification by column chromatography (PE/EtOAc = 3:1), **6ha** (26.4 mg, 78%) was obtained.  $[\alpha]_D^{22} = 4.0$  ( $c$  0.25, acetone);  $^1\text{H}$  NMR (400 MHz,  $\text{CDCl}_3$ )  $\delta$  7.23 (dd,  $J = 16.0, 6.4$  Hz, 1H), 7.11 – 7.00 (m, 4H), 6.53 (s, 2H), 6.06 (dd,  $J = 16.0, 1.2$  Hz, 1H), 5.31 (s, 2H), 4.74 – 4.65 (m, 1H), 2.87 (q,  $J = 6.4$  Hz, 2H), 2.20 – 2.06 (m, 1H), 1.98 – 1.85 (m, 1H), 0.92 (t,  $J = 7.6$  Hz, 3H);  $^{13}\text{C}$  NMR (100 MHz,  $\text{CDCl}_3$ )  $\delta$  175.80 (d,  $J = 4.2$  Hz), 164.22, 161.43, 159.00, 146.35 (d,  $J = 2.9$  Hz), 145.96, 136.54 (d,  $J = 4.2$  Hz), 122.92 (d,  $J = 8.4$  Hz), 121.90, 116.15, 115.91, 81.09 (d,  $J = 2.0$  Hz), 54.23, 47.23 (d,  $J = 16.0$  Hz), 23.92, 10.60; Enantiomeric excess: 95%, determined by HPLC (Chiralpak IC, hexane/*i*-PrOH = 70/30; flow rate 0.8 ml/min; 25 °C; 254 nm), first peak:  $t_R = 12.2$  min, second peak:  $t_R = 13.8$  min. HRMS (ESI) calcd. for  $\text{C}_{20}\text{H}_{18}\text{FNNaO}_5$   $[\text{M}+\text{Na}]^+$ : 394.1061, found: 394.1067.

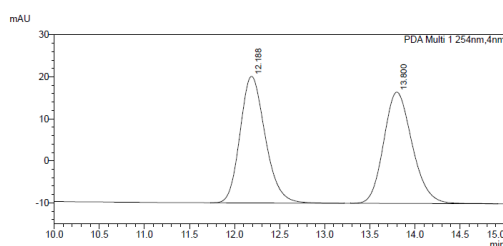

| <Peak Table> |           |         |         |        |
|--------------|-----------|---------|---------|--------|
| Peak#        | Ret. Time | Area    | Area%   | Height |
| 1            | 12.188    | 585218  | 50.100  | 30113  |
| 2            | 13.800    | 582877  | 49.900  | 26475  |
| Total        |           | 1168095 | 100.000 | 56588  |

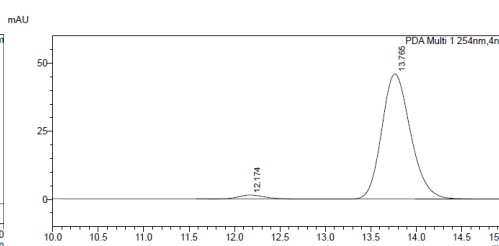

| <Peak Table> |           |         |        |         |
|--------------|-----------|---------|--------|---------|
| Peak#        | Ret. Time | Area    | Height | Area%   |
| 1            | 12.174    | 27801   | 1428   | 2.682   |
| 2            | 13.765    | 1008832 | 45869  | 97.318  |
| Total        |           | 1036632 | 47297  | 100.000 |

### 5.1.9 4-fluorophenyl (4*S*, *E*)-4-((3*aR*,7*aS*)-1,3-dioxo-1,3,3*a*,4,7,7*a*-hexahydro-2*H*-4,7-ethanoisindol-2-yl)hex-2-enoate (**6ia**).

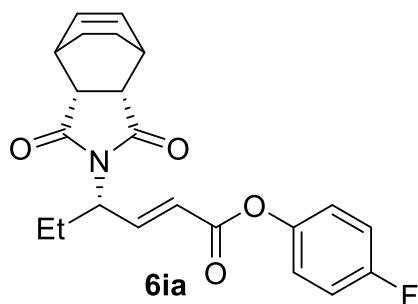

The general procedure was followed using **4i** (0.10 mmol) and **5a** (0.20 mmol). After purification by column chromatography (PE/EtOAc = 7:1), **6ia** (28.4 mg, 73%) was obtained.  $[\alpha]_D^{22} = 3.6$  ( $c$  0.25, acetone);  $^1\text{H}$  NMR (400 MHz,  $\text{CDCl}_3$ )  $\delta$  7.18 (dd,  $J = 16.0, 6.4$  Hz, 1H), 7.09 – 7.01 (m, 4H), 6.26 – 6.18 (m, 2H), 6.00 (dd,  $J = 16.0, 1.2$  Hz, 1H), 4.62 (dd,  $J = 14.4, 6.4$  Hz, 1H), 3.17 (s, 2H), 2.90 – 2.81 (m, 2H), 2.12 – 1.97 (m, 1H), 1.94 – 1.81 (m, 1H), 1.61 (d,  $J = 7.2$  Hz, 2H), 1.40 (d,  $J = 7.6$  Hz, 2H), 0.87 (t,  $J = 7.6$  Hz, 3H);  $^{13}\text{C}$  NMR (100 MHz,  $\text{CDCl}_3$ )  $\delta$  178.40 (d,  $J = 11.7$  Hz), 164.20, 146.34, 132.59 (d,  $J = 2.1$  Hz), 122.89 (d,  $J = 8.4$  Hz), 121.81, 116.13, 115.90, 53.78, 43.99 (d,  $J = 11.0$  Hz), 31.70, 23.81, 23.63 (d,  $J = 5.1$  Hz), 10.81; Enantiomeric excess: 92%, determined by HPLC (Chiralpak IC, hexane/*i*-PrOH = 90/10; flow rate 1.0 ml/min; 25 °C; 254 nm), first peak:  $t_R = 18.1$  min, second peak:  $t_R = 19.4$  min. HRMS (ESI) calcd. For  $\text{C}_{22}\text{H}_{22}\text{FNNaO}_4$   $[\text{M}+\text{Na}]^+$ : 406.1425, found: 406.1427.

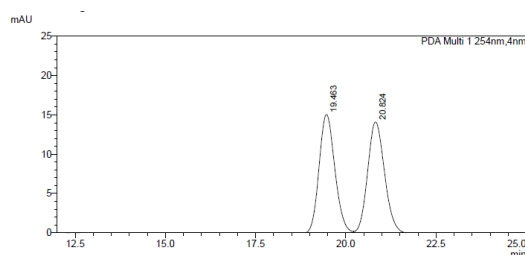

| <Peak Table> |           |        |         |        |
|--------------|-----------|--------|---------|--------|
| Peak#        | Ret. Time | Area   | Area%   | Height |
| 1            | 19.463    | 464157 | 49.909  | 15136  |
| 2            | 20.824    | 465854 | 50.091  | 14194  |
| Total        |           | 930011 | 100.000 | 29330  |

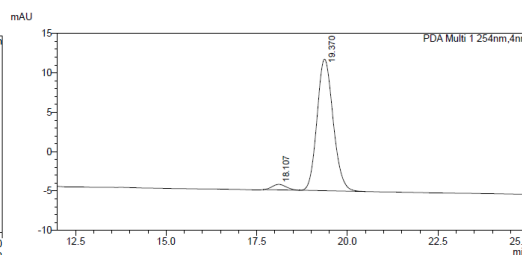

| <Peak Table> |           |        |         |        |
|--------------|-----------|--------|---------|--------|
| Peak#        | Ret. Time | Area   | Area%   | Height |
| 1            | 18.107    | 18757  | 3.501   | 698    |
| 2            | 19.370    | 516980 | 96.499  | 16698  |
| Total        |           | 535737 | 100.000 | 17396  |

#### 5.1.10 4-fluorophenyl (4*S*, *E*)-4-((3*aR*,6*aS*)-1,3-dioxo-3,3*a*,4,4*a*,5,5*a*,6,6*a*-octahydro-4,6-ethenocyclopropa[*f*]isoindol-2(1*H*)-yl)hex-2-enoate (**6ja**).

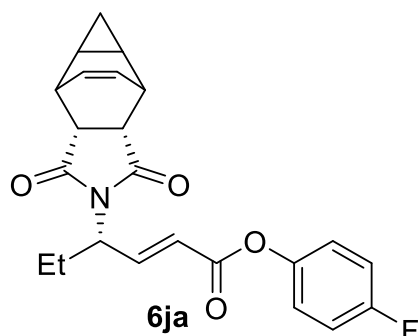

The general procedure was followed using **4j** (0.10 mmol) and **5a** (0.20 mmol). After purification by column chromatography (PE/EtOAc = 5:1), **6ja** (26.8 mg, 68%) was obtained.  $[\alpha]_D^{22} = 2.8$  ( $c$  0.25, acetone);  $^1\text{H}$  NMR (400 MHz,  $\text{CDCl}_3$ )  $\delta$  7.17 (dd,  $J = 16.0, 6.4$  Hz, 1H), 7.06 (d,  $J = 6.4$  Hz, 4H), 6.00 (dd,  $J = 15.6, 1.2$  Hz, 1H), 5.83 – 5.76 (m, 2H), 4.65 – 4.58 (m, 1H), 3.41 (d,  $J = 2.0$  Hz, 2H), 3.03 – 2.96 (m, 2H), 2.10 – 1.97 (m, 1H), 1.94 – 1.82 (m, 1H), 1.14 – 1.08 (m, 2H), 0.87 (t,  $J = 7.6$  Hz, 3H), 0.33 – 0.27 (m, 1H), 0.26 – 0.20 (m, 1H);  $^{13}\text{C}$  NMR (100 MHz,  $\text{CDCl}_3$ )  $\delta$  178.04 (d,  $J = 10.1$  Hz), 164.22, 161.42, 146.38, 146.33 (d,  $J = 2.9$  Hz), 127.95 (d,  $J = 3.8$  Hz), 122.91 (d,  $J = 8.5$  Hz), 121.82, 116.16, 115.92, 53.68, 45.09 (d,  $J = 10.8$  Hz), 33.48, 23.85, 10.84, 9.80 (d,  $J = 5.4$  Hz), 4.73; Enantiomeric excess: 94%, determined by HPLC (Chiralpak IC, hexane/*i*-PrOH = 80/20; flow rate 0.8 ml/min; 25 °C; 210 nm), first peak:  $t_R = 19.1$  min, second peak:  $t_R = 24.8$  min. HRMS (ESI) calcd. For  $\text{C}_{23}\text{H}_{22}\text{FNNaO}_4$   $[\text{M}+\text{Na}]^+$ : 418.1425, found: 418.1425.

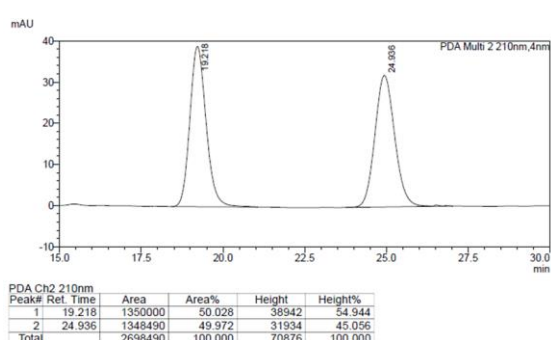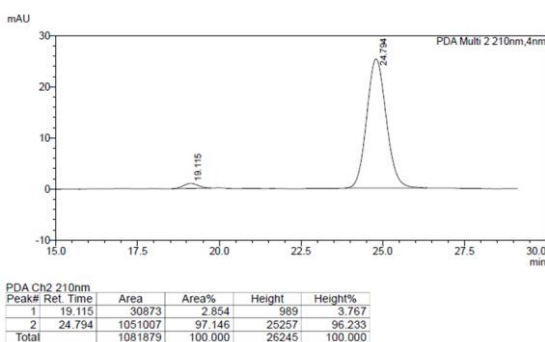

#### 5.1.11 4-fluorophenyl (4*S*, *E*)-4-(2,5-dioxopyrrolidin-1-yl)hex-2-enoate (**6ka**).

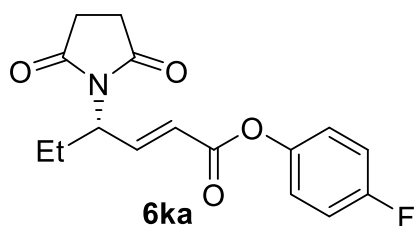

The general procedure was followed using **4k** (0.10 mmol) and **5a** (0.20 mmol). After purification by column chromatography (PE/EtOAc = 3:1), **6ka** (24.8 mg, 81%) was obtained.  $[\alpha]_D^{22} = 10.0$  (*c* 0.25, acetone);  $^1\text{H}$  NMR (400 MHz,  $\text{CDCl}_3$ )  $\delta$  7.29 (dd, *J* = 15.6, 6.8 Hz, 1H), 7.11 – 7.02 (m, 4H), 6.07 (d, *J* = 16.0 Hz, 1H), 4.74 (dd, *J* = 15.2, 8.0 Hz, 1H), 2.75 (s, 4H), 2.17 – 1.93 (m, 2H), 0.92 (t, *J* = 7.6 Hz, 3H);  $^{13}\text{C}$  NMR (100 MHz,  $\text{CDCl}_3$ )  $\delta$  176.58, 164.13, 161.46, 159.03, 146.32 (d, *J* = 2.9 Hz), 145.92, 122.89 (d, *J* = 8.4 Hz), 122.50, 116.19, 115.96, 54.08, 28.04, 23.82, 10.78; Enantiomeric excess: 87%, determined by HPLC (Chiralpak IC, hexane/*i*-PrOH = 70/30; flow rate 0.8 ml/min; 25 °C; 254 nm), first peak: *t*<sub>R</sub> = 15.1 min, second peak: *t*<sub>R</sub> = 18.9 min. HRMS (ESI) calcd. For  $\text{C}_{16}\text{H}_{16}\text{FNNaO}_4$   $[\text{M}+\text{Na}]^+$ : 328.0956, found: 328.0951.

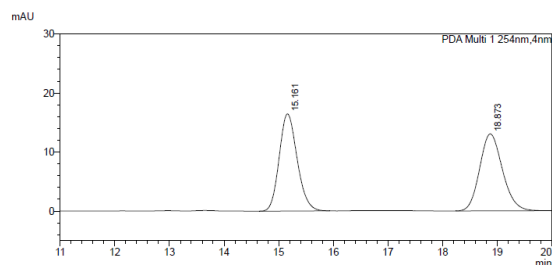

<Peak Table>

| Peak# | Ret. Time | Area   | Area%   | Height | Height% |
|-------|-----------|--------|---------|--------|---------|
| 1     | 15.161    | 377075 | 49.965  | 16472  | 55.818  |
| 2     | 18.873    | 377600 | 50.035  | 13039  | 44.182  |
| Total |           | 754676 | 100.000 | 29511  | 100.000 |

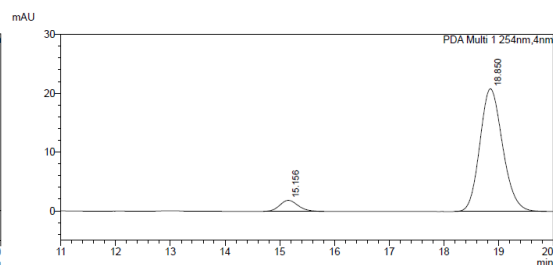

<Peak Table>

| Peak# | Ret. Time | Area   | Area%   | Height | Height% |
|-------|-----------|--------|---------|--------|---------|
| 1     | 15.156    | 43282  | 6.684   | 1874   | 8.238   |
| 2     | 18.850    | 604254 | 93.316  | 20868  | 91.762  |
| Total |           | 647535 | 100.000 | 22742  | 100.000 |

#### 5.1.12 4-fluorophenyl (4*S*, *E*)-4-(1,3-dioxoisindolin-2-yl)hex-2-enoate (**6la**).

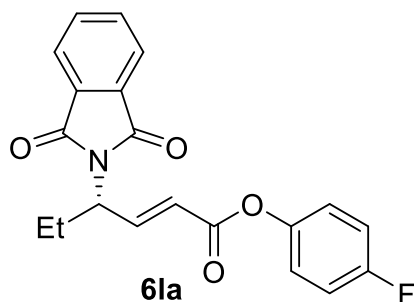

The general procedure was followed using **4l** (0.10 mmol) and **5a** (0.25 mmol). After purification by column chromatography (PE/EtOAc = 6:1), **6la** (30.0 mg, 81%) was obtained.  $[\alpha]_D^{22} = 3.5$  (*c* 0.25, acetone);  $^1\text{H}$  NMR (400 MHz,  $\text{CDCl}_3$ )  $\delta$  7.90 – 7.83 (m, 2H), 7.79 – 7.72 (m, 2H), 7.37 (dd, *J* = 15.6, 6.4 Hz, 1H), 7.11 – 6.99 (m, 4H), 6.11 (dd, *J* = 16.0, 1.6 Hz, 1H), 4.89 (dd, *J* = 14.8, 6.8 Hz, 1H), 2.31 – 2.17 (m, 1H), 2.12 – 2.00 (m, 1H), 0.97 (t, *J* = 7.2 Hz, 3H);  $^{13}\text{C}$  NMR (100 MHz,  $\text{CDCl}_3$ )  $\delta$  167.79, 164.20, 161.41, 158.99, 146.77, 146.32 (d, *J* = 2.8 Hz), 134.24, 131.63, 123.45, 122.88 (d, *J* = 8.5 Hz), 121.95, 116.15, 115.91, 53.37, 24.64, 10.88; Enantiomeric excess: 90%, determined by HPLC (Chiralpak IC, hexane/*i*-PrOH = 90/10; flow rate 0.8 ml/min; 25 °C; 210 nm), first peak: *t*<sub>R</sub> = 15.2 min, second peak: *t*<sub>R</sub> = 24.2 min. HRMS (ESI) calcd. For  $\text{C}_{20}\text{H}_{16}\text{FNNaO}_4$  [*M*+Na]<sup>+</sup>: 376.0956, found: 376.0954.

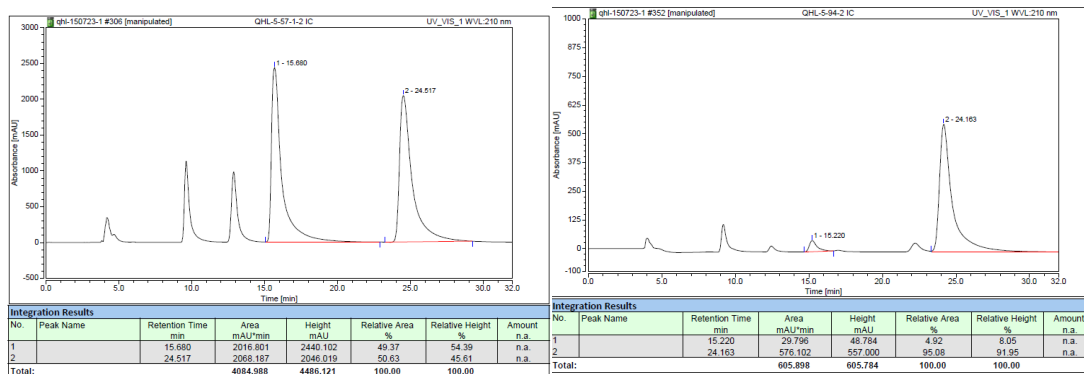

#### 5.1.13 4-fluorophenyl (4*S*, *E*)-4-(1,3-dioxo-1,3,3a,4,7,7a-hexahydro-2*H*-isoindol-2-yl)pent-2-enoate (**6ab**).

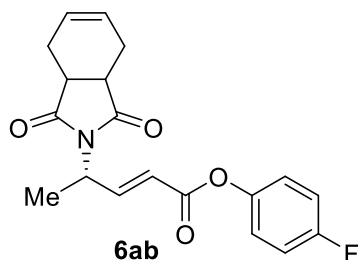

The general procedure was followed using **4a** (0.1 mmol) and **5b** (0.2 mmol). After purification by column chromatography (PE/EtOAc = 4:1), **6ab** (24.0 mg, 70%) was obtained.  $[\alpha]_D^{22} = 18.8$  (*c* 0.25, acetone);  $^1\text{H}$  NMR (400 MHz,  $\text{CDCl}_3$ )  $\delta$  7.16 (dd, *J* = 16.0, 5.2 Hz, 1H), 7.05 (d, *J* = 6.4 Hz, 4H), 5.98 (dd, *J* = 16.0, 1.6 Hz, 1H), 5.95 – 5.90 (m, 2H), 5.00 – 4.89 (m, 1H), 3.15 – 3.02 (m, 2H), 2.64 (d, *J* = 16.4 Hz, 2H),



2.31 – 2.15 (m, 2H), 1.53 (d,  $J = 7.2$  Hz, 3H);  $^{13}\text{C}$  NMR (100 MHz,  $\text{CDCl}_3$ )  $\delta$  179.35 (d,  $J = 7.2$  Hz), 164.19, 161.39, 158.97, 147.39, 146.30 (d,  $J = 2.8$  Hz), 127.86, 122.90 (d,  $J = 8.5$  Hz), 121.10, 116.14, 115.91, 47.61, 39.00, 23.59 (d,  $J = 3.4$  Hz), 16.78; Enantiomeric excess: 93%, determined by HPLC (Chiralpak IC, hexane/*i*-PrOH = 90/10; flow rate 0.8 ml/min; 25 °C; 210 nm), first peak:  $t_R = 32.6$  min, second peak:  $t_R = 41.9$  min. HRMS (ESI) calcd. For  $\text{C}_{19}\text{H}_{18}\text{FNNaO}_4$   $[\text{M}+\text{Na}]^+$ : 366.1112, found: 366.1107.

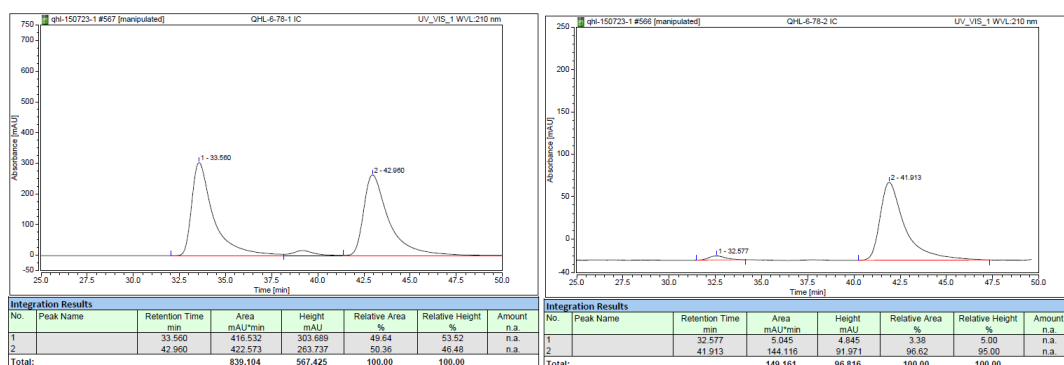

#### 5.1.14 4-fluorophenyl (4*S*, *E*)-4-(1,3-dioxo-1,3,3a,4,7,7a-hexahydro-2*H*-isoindol-2-yl)hept-2-enoate (**6ac**).

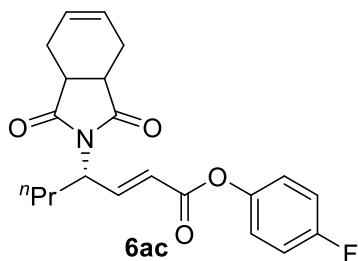

The general procedure was followed using **4a** (0.1 mmol) and **5c** (0.2 mmol). After purification by column chromatography (PE/EtOAc = 4:1), **6ac** (33.0 mg, 89%) was obtained.  $[\alpha]_D^{22} = 6.4$  ( $c$  0.25, acetone);  $^1\text{H}$  NMR (400 MHz,  $\text{CDCl}_3$ )  $\delta$  7.21 (dd,  $J = 15.6, 6.0$  Hz, 1H), 7.10 – 7.00 (m, 4H), 5.98 (dd,  $J = 16.0, 1.6$  Hz, 1H), 5.96 – 5.88 (m, 2H), 4.85 – 4.73 (m, 1H), 3.16 – 3.05 (m, 2H), 2.70 – 2.58 (m, 2H), 2.23 (dd,  $J = 14.8, 6.4$  Hz, 2H), 2.15 – 2.03 (m, 1H), 1.85 – 1.73 (m, 1H), 1.29 – 1.18 (m, 2H), 0.91 (t,  $J = 7.6$  Hz, 3H);  $^{13}\text{C}$  NMR (100 MHz,  $\text{CDCl}_3$ )  $\delta$  179.58 (d,  $J = 11.3$  Hz), 164.17, 161.40, 158.97, 146.42, 146.32 (d,  $J = 2.8$  Hz), 127.95, 122.89 (d,  $J = 8.4$  Hz), 121.65, 116.13, 115.90, 52.27, 38.97 (d,  $J = 10.8$  Hz), 32.42, 23.61, 19.32, 13.36;

Enantiomeric excess: 91%, determined by HPLC (Chiralpak OD-H, hexane/ *i*-PrOH = 90/10; flow rate 0.8 ml/min; 25 °C; 210 nm), first peak:  $t_R$  = 37.0 min, second peak:  $t_R$  = 50.8 min. HRMS (ESI) calcd. For  $C_{21}H_{22}FNNaO_4$   $[M+Na]^+$ : 394.1425, found: 394.1431.

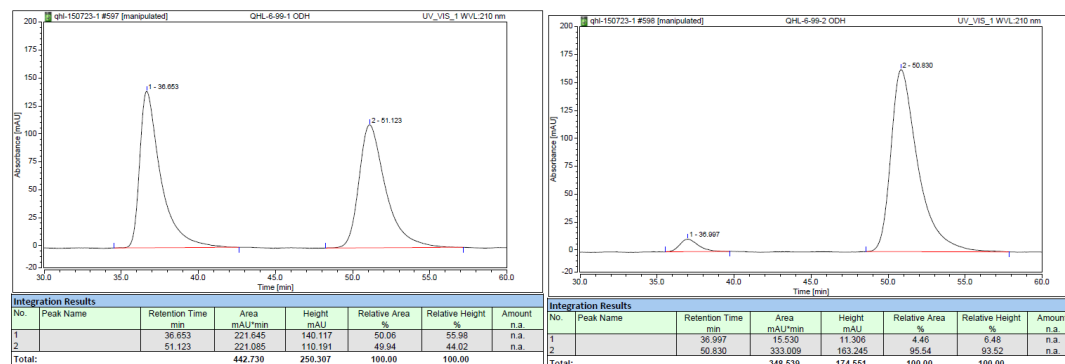

#### 5.1.15 4-fluorophenyl (4*S*, *E*)-4-(1,3-dioxo-1,3,3a,4,7,7a-hexahydro-2*H*-isoindol-2-yl)tetradec-2-enoate (**6ad**).

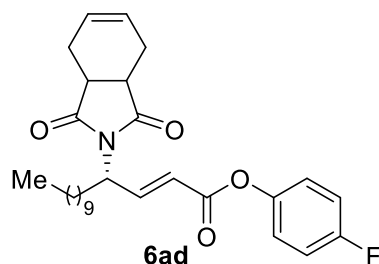

The general procedure was followed using **4a** (0.1 mmol) and **5d** (0.2 mmol). After purification by column chromatography (PE/EtOAc = 4:1), **6ad** (38.9 mg, 83%) was obtained.  $[\alpha]_D^{22}$  = 7.6 (*c* 0.25, acetone);  $^1\text{H}$  NMR (400 MHz,  $\text{CDCl}_3$ )  $\delta$  7.21 (dd,  $J$  = 15.6, 6.4 Hz, 1H), 7.05 (d,  $J$  = 6.4 Hz, 4H), 5.98 (dd,  $J$  = 15.6, 1.2 Hz, 1H), 5.96 – 5.90 (m, 2H), 4.82 – 4.71 (m, 1H), 3.17 – 3.04 (m, 2H), 2.65 (dd,  $J$  = 10.4, 4.8 Hz, 2H), 2.23 (dd,  $J$  = 14.8, 6.8 Hz, 2H), 2.16 – 2.01 (m, 1H), 1.89 – 1.75 (m, 1H), 1.31 – 1.17 (m, 16H), 0.87 (t,  $J$  = 6.4 Hz, 3H);  $^{13}\text{C}$  NMR (100 MHz,  $\text{CDCl}_3$ )  $\delta$  179.62 (d,  $J$  = 10.1 Hz), 164.22, 161.40, 158.97, 146.49, 146.30 (d,  $J$  = 2.9 Hz), 128.00, 122.90 (d,  $J$  = 8.5 Hz), 121.61, 116.15, 115.92, 52.59, 38.97 (d,  $J$  = 12.1 Hz), 31.86, 30.39, 29.52, 29.45, 29.39, 29.28, 28.87, 26.08, 23.64, 22.65, 14.10; Enantiomeric excess: 91%, determined by HPLC (Chiralpak OD-H, hexane/*i*-PrOH = 90/10; flow rate 0.8 ml/min;

25 °C; 210 nm), first peak:  $t_R$  = 28.9 min, second peak:  $t_R$  = 35.9 min. HRMS (ESI) calcd. For  $C_{28}H_{36}FNNaO_4$   $[M+Na]^+$ : 492.2521, found: 492.2521.

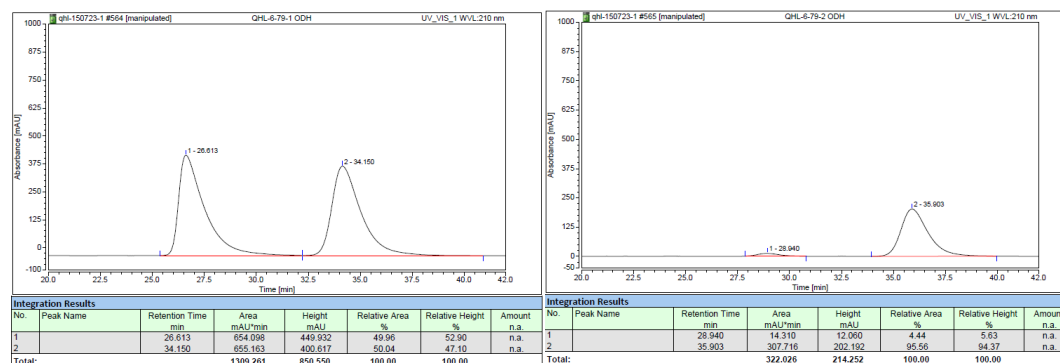

### 5.1.16 4-fluorophenyl (4*S*, *E*)-4-(1,3-dioxo-1,3,3a,4,7,7a-hexahydro-2*H*-isoindol-2-yl)-5-methylhex-2-enoate (**6ae**).

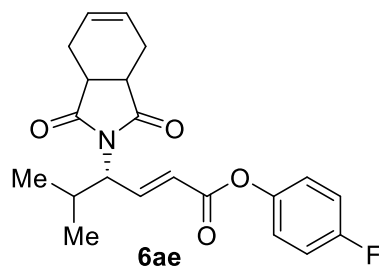

The general procedure was followed using **4a** (0.1 mmol) and **5e** (0.2 mmol). After purification by column chromatography (PE/EtOAc = 5:1), **6ae** (27.7 mg, 75%) was obtained.  $[\alpha]_D^{25} = 13.6$  ( $c$  0.25, acetone);  $^1H$  NMR (400 MHz,  $CDCl_3$ )  $\delta$  7.33 (dd,  $J$  = 16.0, 8.4 Hz, 1H), 7.12 – 7.00 (m, 4H), 6.04 (dd,  $J$  = 15.6, 0.4 Hz, 1H), 5.98 – 5.89 (m, 2H), 4.35 – 4.25 (m, 1H), 3.15 – 3.05 (m, 2H), 2.64 (d,  $J$  = 14.0 Hz, 2H), 2.53 (qd,  $J$  = 13.2, 6.8 Hz, 1H), 2.23 (dd,  $J$  = 14.8, 7.2 Hz, 2H), 0.97 (d,  $J$  = 6.4 Hz, 3H), 0.79 (d,  $J$  = 6.8 Hz, 3H);  $^{13}C$  NMR (100 MHz,  $CDCl_3$ )  $\delta$  179.62 (d,  $J$  = 11.7 Hz), 164.06, 161.39, 158.96, 146.30 (d,  $J$  = 2.8 Hz), 145.09, 128.03 (d,  $J$  = 2.2 Hz), 123.54, 122.87 (d,  $J$  = 8.4 Hz), 116.12, 115.89, 59.60, 39.04, 38.80, 28.21, 23.59 (d,  $J$  = 7.5 Hz), 20.16, 19.44; Enantiomeric excess: 93%, determined by HPLC (Chiralpak OD-H, hexane/ *i*-PrOH = 90/10; flow rate 0.8 ml/min; 25 °C; 210 nm), first peak:  $t_R$  = 19.3 min, second peak:  $t_R$  = 22.9 min. HRMS (ESI) calcd. For  $C_{21}H_{22}FNNaO_4$   $[M+Na]^+$ : 394.1425, found: 394.1427.

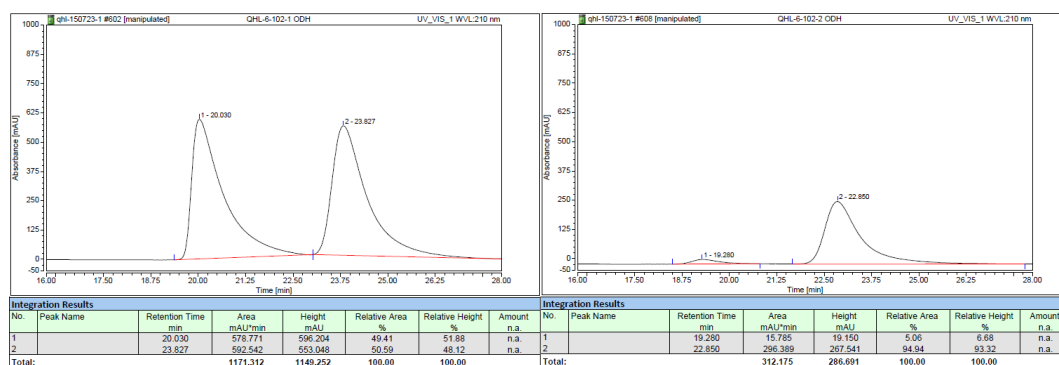

### 5.1.17 4-fluorophenyl (4*S*, *E*)-4-cyclopentyl-4-(1,3-dioxo-1,3,3a,4,7,7a-hexahydro-2*H*-isoindol-2-yl)but-2-enoate (**6af**).

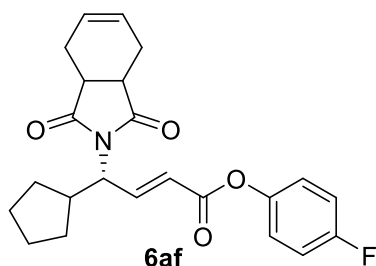

The general procedure was followed using **4a** (0.1 mmol) and **5f** (0.2 mmol). After purification by column chromatography (PE/EtOAc = 5:1), **6af** (39.4 mg, 98%) was obtained.  $[\alpha]_D^{25} = -6.0$  (c 0.25, acetone);  $^1\text{H}$  NMR (400 MHz,  $\text{CDCl}_3$ )  $\delta$  7.27 (dd,  $J = 16.0, 7.6$  Hz, 1H), 7.09 – 7.02 (m, 4H), 5.99 (dd,  $J = 15.6, 0.8$  Hz, 1H), 5.96 – 5.92 (m, 2H), 4.46 (dd,  $J = 10.0, 7.2$  Hz, 1H), 3.17 – 3.05 (m, 2H), 2.86 – 2.72 (m, 1H), 2.65 (dd,  $J = 10.8, 4.4$  Hz, 2H), 2.23 (dd,  $J = 14.8, 6.8$  Hz, 2H), 1.93 – 1.78 (m, 1H), 1.72 – 1.58 (m, 3H), 1.57 – 1.48 (m, 2H), 1.23 – 1.15 (m, 1H), 1.09 – 0.97 (m, 1H);  $^{13}\text{C}$  NMR (100 MHz,  $\text{CDCl}_3$ )  $\delta$  179.67 (d,  $J = 11.4$  Hz), 164.22, 161.40, 158.97, 146.31 (d,  $J = 2.9$  Hz), 145.52, 127.99, 122.89 (d,  $J = 8.4$  Hz), 122.29, 116.14, 115.90, 58.04, 39.83, 39.04, 38.84, 30.80, 30.16, 25.37, 24.77, 23.62 (d,  $J = 4.2$  Hz); Enantiomeric excess: 88%, determined by HPLC (Chiralpak OD-H, hexane/*i*-PrOH = 90/10; flow rate 0.8 ml/min; 25 °C; 210 nm), first peak:  $t_R = 19.4$  min, second peak:  $t_R = 23.0$  min. HRMS (ESI) calcd. For  $\text{C}_{23}\text{H}_{24}\text{FNNaO}_4$   $[\text{M}+\text{Na}]^+$ : 420.1581, found: 420.1582.

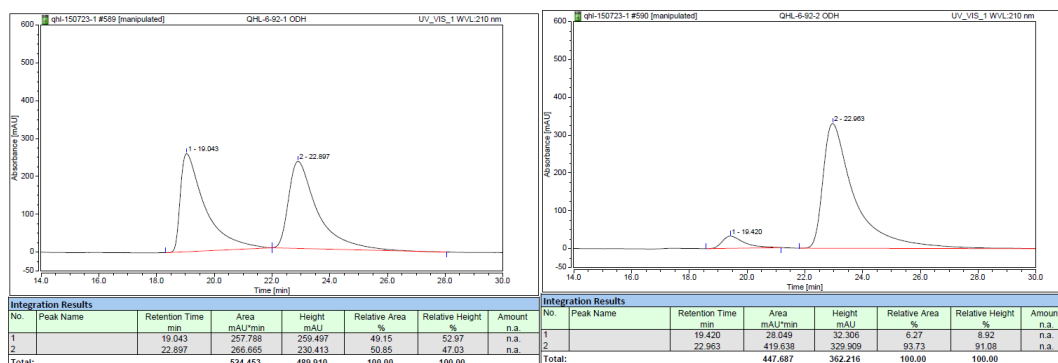

#### 5.1.18 4-fluorophenyl (4*S*, *E*)-4-cyclohexyl-4-(1,3-dioxo-1,3,3a,4,7,7a-hexahydro-2*H*-isoindol-2-yl)but-2-enoate (**6ag**).

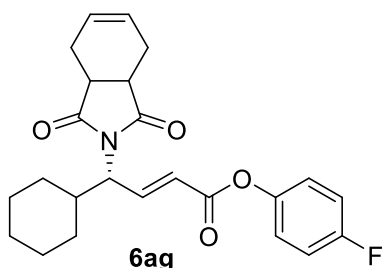

The general procedure was followed using **4a** (0.1 mmol) and **5g** (0.2 mmol). After purification by column chromatography (PE/EtOAc = 5:1), **6ag** (22.0 mg, 54%) was obtained.  $[\alpha]_D^{25} = 10.8$  (*c* 0.25, acetone);  $^1\text{H}$  NMR (400 MHz,  $\text{CDCl}_3$ )  $\delta$  7.34 (dd,  $J = 15.6, 8.4$  Hz, 1H), 7.13 – 7.03 (m, 4H), 6.02 (d,  $J = 15.6$  Hz, 1H), 5.97 – 5.89 (m, 2H), 4.46 – 4.32 (m, 1H), 3.15 – 3.04 (m, 2H), 2.63 (dd,  $J = 15.6, 2.4$  Hz, 2H), 2.27 – 2.21 (m, 2H), 1.82 – 1.64 (m, 4H), 1.46 (d,  $J = 12.6$  Hz, 1H), 1.28 – 1.21 (m, 2H), 1.18 – 1.08 (m, 2H), 0.97 – 0.87 (m, 1H), 0.87 – 0.73 (m, 1H);  $^{13}\text{C}$  NMR (100 MHz,  $\text{CDCl}_3$ )  $\delta$  179.67 (d,  $J = 11.1$  Hz), 164.06, 161.40, 158.97, 146.32 (d,  $J = 2.9$  Hz), 144.99, 127.98 (d,  $J = 4.6$  Hz), 123.59, 122.88 (d,  $J = 8.5$  Hz), 116.13, 115.89, 58.38, 39.01, 38.81, 36.74, 30.62, 29.40, 25.94, 25.36 (d,  $J = 4.6$  Hz), 23.59 (d,  $J = 7.8$  Hz); Enantiomeric excess: 89%, determined by HPLC (Chiralpak OD-H, hexane/*i*-PrOH = 90/10; flow rate 0.8 ml/min; 25 °C; 210 nm), first peak:  $t_R = 17.9$  min, second peak:  $t_R = 21.1$  min. HRMS (ESI) calcd. For  $\text{C}_{24}\text{H}_{26}\text{FNNaO}_4$   $[\text{M}+\text{Na}]^+$ : 434.1738, found: 434.1736.

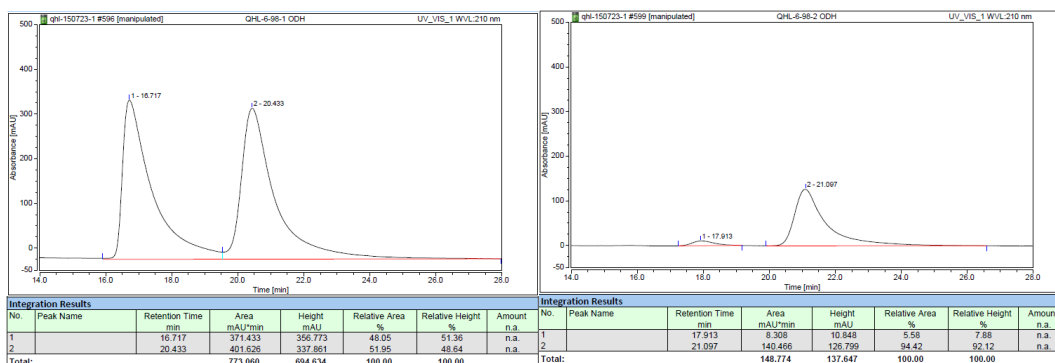

### 5.1.19 4-fluorophenyl (4*S*, *E*)-7-chloro-4-(1,3-dioxo-1,3,3a,4,7,7a-hexahydro-2*H*-isoindol-2-yl)hept-2-enoate (**6ah**).

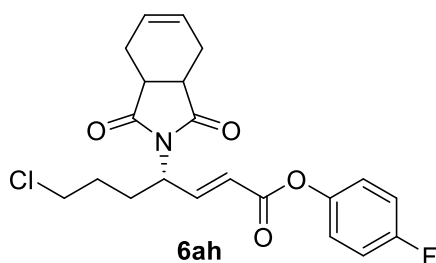

The general procedure was followed using **4a** (0.1 mmol) and **5h** (0.2 mmol). After purification by column chromatography (PE/EtOAc = 5:1), **6ah** (29.1 mg, 80%) was obtained.  $[\alpha]_D^{22} = 10.8$  (*c* 0.25, acetone);  $^1\text{H}$  NMR (400 MHz,  $\text{CDCl}_3$ )  $\delta$  7.20 (dd,  $J = 16.0, 6.4$  Hz, 1H), 7.09 – 7.02 (m, 4H), 6.03 (dd,  $J = 15.6, 1.2$  Hz, 1H), 5.99 – 5.91 (m, 2H), 4.84 – 4.74 (m, 1H), 3.51 (t,  $J = 6.4$  Hz, 2H), 3.17 – 3.08 (m, 2H), 2.71 – 2.58 (m, 2H), 2.22 (dd,  $J = 14.8, 6.4$  Hz, 2H), 2.06 – 1.96 (m, 1H), 1.72 – 1.65 (m, 2H), 1.22 (dt,  $J = 19.6, 7.2$  Hz, 1H);  $^{13}\text{C}$  NMR (100 MHz,  $\text{CDCl}_3$ )  $\delta$  179.52 (d,  $J = 7.8$  Hz), 164.00, 161.42, 158.99, 146.26 (d,  $J = 2.8$  Hz), 145.58, 128.07 (d,  $J = 4.3$  Hz), 122.85 (d,  $J = 8.5$  Hz), 122.22, 116.16, 115.92, 51.71, 43.70, 39.01 (d,  $J = 13.5$  Hz), 28.99, 27.70, 23.63; Enantiomeric excess: 88%, determined by HPLC (Chiralpak IC, hexane/*i*-PrOH = 90/10; flow rate 0.8 ml/min; 25 °C; 210 nm), first peak:  $t_R = 35.2$  min, second peak:  $t_R = 42.6$  min. HRMS (ESI) calcd. For  $\text{C}_{21}\text{H}_{21}\text{ClFNNaO}_4$   $[\text{M}+\text{Na}]^+$ : 428.1042, found: 428.1035.

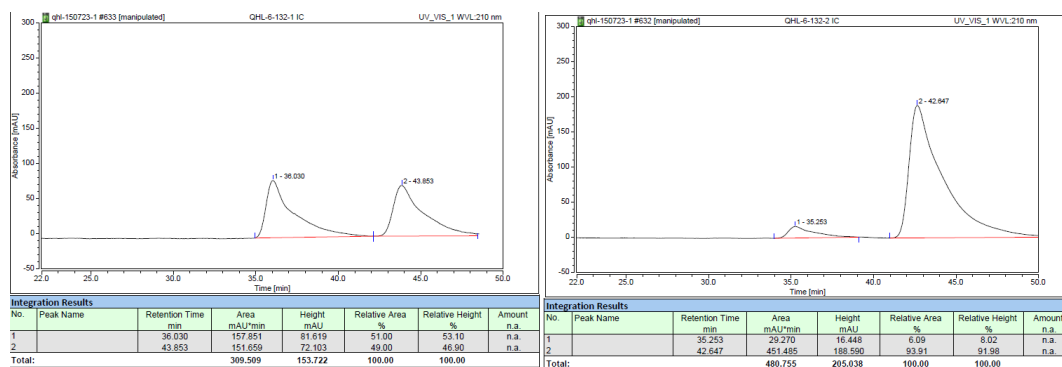

### 5.1.20 4-fluorophenyl (4*S*, *E*)-8-bromo-4-(1,3-dioxo-1,3,3a,4,7,7a-hexahydro-2*H*-isoindol-2-yl)oct-2-enoate (**6ai**).

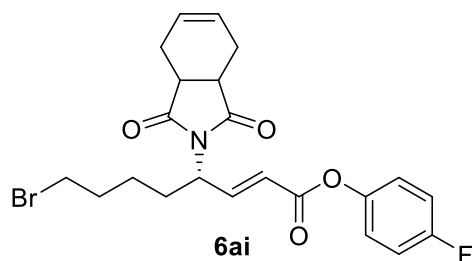

The general procedure was followed using **4a** (0.1 mmol) and **5i** (0.2 mmol). After purification by column chromatography (PE/EtOAc = 6:1), **6ai** (35.0 mg, 75%) was obtained.  $[\alpha]_D^{25} = 5.2$  ( $c$  0.25, acetone);  $^1\text{H}$  NMR (400 MHz,  $\text{CDCl}_3$ )  $\delta$  7.20 (dd,  $J = 15.6, 6.4$  Hz, 1H), 7.12 – 7.00 (m, 4H), 6.00 (dd,  $J = 16.0, 1.2$  Hz, 1H), 5.98 – 5.93 (m, 2H), 4.84 – 4.72 (m, 1H), 3.42 – 3.31 (m, 2H), 3.17 – 3.08 (m, 2H), 2.65 (dd,  $J = 10.4, 4.8$  Hz, 2H), 2.29 – 2.20 (m, 2H), 2.19 – 2.10 (m, 1H), 1.93 – 1.72 (m, 3H), 1.43 – 1.31 (m, 2H);  $^{13}\text{C}$  NMR (100 MHz,  $\text{CDCl}_3$ )  $\delta$  179.57 (d,  $J = 9.1$  Hz), 164.07, 161.42, 158.99, 146.29 (d,  $J = 2.9$  Hz), 145.91, 128.05, 122.87 (d,  $J = 8.4$  Hz), 121.99, 116.15, 115.92, 99.95, 52.24, 39.01 (d,  $J = 11.6$  Hz), 33.22, 31.75, 29.53, 24.62, 23.61; Enantiomeric excess: 92%, determined by HPLC (Chiralpak IC, hexane/*i*-PrOH = 90/10; flow rate 0.8 ml/min; 25 °C; 254 nm), first peak:  $t_R = 37.4$  min, second peak:  $t_R = 43.6$  min. HRMS (ESI) calcd. For  $\text{C}_{22}\text{H}_{23}\text{BrFNNaO}_4$   $[\text{M}+\text{Na}]^+$ : 486.0687, found: 486.0680.

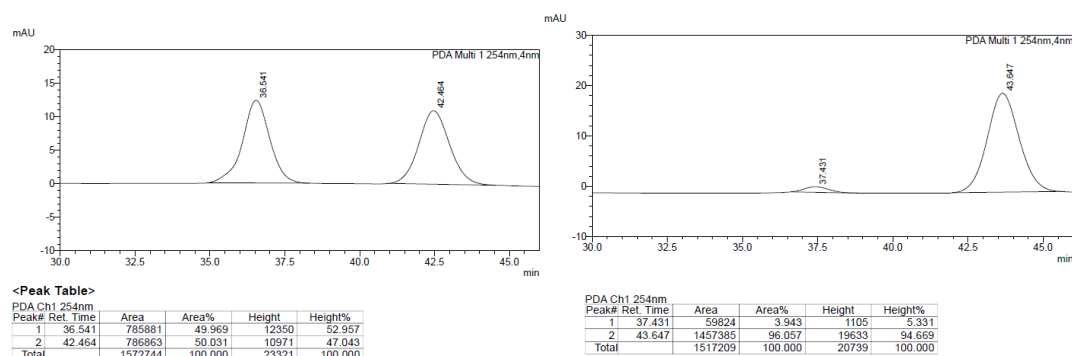

### 5.1.21 1-(4-fluorophenyl)-7-methyl-(4*S*, *E*)-4-(1,3-dioxo-1,3,3a,4,7,7a-hexahydro-2*H*-isoindol-2-yl)hept-2-enedioate (**6aj**).

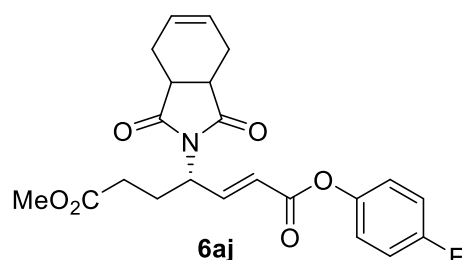

The general procedure was followed using **4a** (0.1 mmol) and **5j** (0.2 mmol). After purification by column chromatography (PE/EtOAc = 5:1), **6aj** (34.0 mg, 82%) was obtained.  $[\alpha]_D^{22} = 13.6$  (*c* 0.25, acetone);  $^1\text{H}$  NMR (400 MHz,  $\text{CDCl}_3$ )  $\delta$  7.18 (dd, *J* = 15.6, 6.0 Hz, 1H), 7.05 (d, *J* = 6.4 Hz, 4H), 6.02 (dd, *J* = 15.6, 1.6 Hz, 1H), 5.99 – 5.91 (m, 2H), 4.87 – 4.80 (m, 1H), 3.66 (s, 3H), 3.18 – 3.06 (m, 2H), 2.64 (d, *J* = 17.6 Hz, 2H), 2.44 – 2.34 (m, 1H), 2.28 – 2.17 (m, 5H);  $^{13}\text{C}$  NMR (100 MHz,  $\text{CDCl}_3$ )  $\delta$  179.45 (d, *J* = 12.5 Hz), 172.38, 163.95, 161.40, 158.97, 146.25 (d, *J* = 2.8 Hz), 145.34, 128.06 (d, *J* = 8.2 Hz), 122.85 (d, *J* = 8.5 Hz), 122.33, 116.13, 115.89, 51.78 (d, *J* = 0.6 Hz), 51.56, 38.99 (d, *J* = 8.8 Hz), 30.34, 25.56, 23.62, 23.59 (d, *J* = 6.0 Hz); Enantiomeric excess: 91%, determined by HPLC (Chiralpak IE, hexane/*i*-PrOH = 70/30; flow rate 0.8 ml/min; 25 °C; 190 nm), first peak: *t*<sub>R</sub> = 31.0 min, second peak: *t*<sub>R</sub> = 34.2 min. HRMS (ESI) calcd. For  $\text{C}_{22}\text{H}_{22}\text{FNNaO}_6$   $[\text{M}+\text{Na}]^+$ : 438.1323, found: 438.1322.



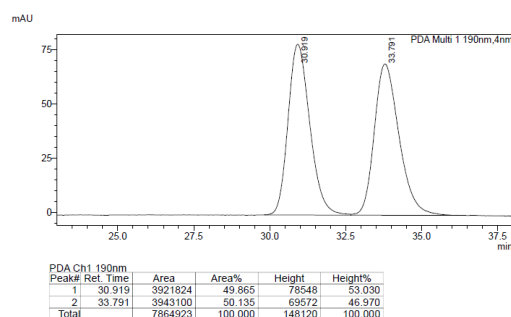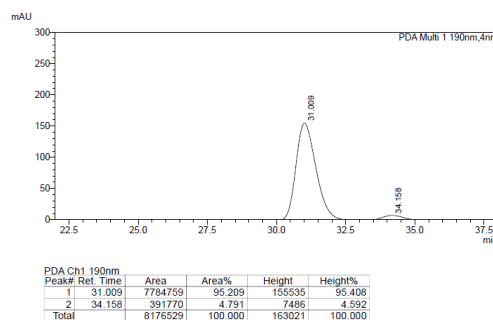

### 5.1.22 4-fluorophenyl (4*S*, *E*)-4-(1,3-dioxo-1,3,3a,4,7,7a-hexahydro-2*H*-isoindol-2-yl)-6-phenylhex-2-enoate (**6ak**).

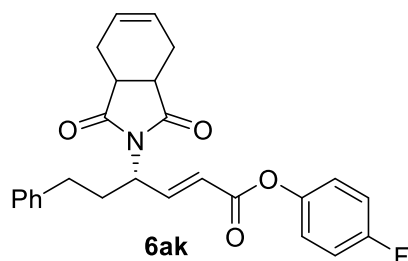

The general procedure was followed using **4a** (0.1 mmol) and **5k** (0.2 mmol). After purification by column chromatography (PE/EtOAc = 5:1), **6ak** (35.1 mg, 81%) was obtained.  $[\alpha]_D^{22} = -6.4$  (*c* 0.25, acetone);  $^1\text{H}$  NMR (400 MHz,  $\text{CDCl}_3$ )  $\delta$  7.26 – 7.21 (m, 2H), 7.19 – 7.12 (m, 3H), 7.09 (d, *J* = 7.2 Hz, 2H), 7.01 (d, *J* = 6.4 Hz, 4H), 5.98 – 5.85 (m, 3H), 4.85 – 4.75 (m, 1H), 3.00 – 2.86 (m, 2H), 2.63 – 2.57 (m, 2H), 2.55 – 2.49 (m, 2H), 2.20 – 2.15 (m, 1H), 2.15 – 2.06 (m, 2H);  $^{13}\text{C}$  NMR (100 MHz,  $\text{CDCl}_3$ )  $\delta$  179.58 (d, *J* = 11.1 Hz), 164.08, 161.38, 158.96, 146.28 (d, *J* = 2.8 Hz) 146.09, 140.26, 128.47, 128.42, 128.39 (d, *J* = 6.6 Hz), 128.27, 128.06 (d, *J* = 4.9 Hz), 126.23, 125.97, 122.86 (d, *J* = 8.5 Hz), 121.79, 116.12, 115.88, 52.46, 38.94 (d, *J* = 4.4 Hz), 32.64, 31.53, 23.57 (d, *J* = 3.8 Hz); Enantiomeric excess: 85%, determined by HPLC (Chiralpak IE, hexane/*i*-PrOH = 80/20; flow rate 0.8 ml/min; 25 °C; 254 nm), first peak:  $t_R$  = 16.9 min, second peak:  $t_R$  = 18.8 min. HRMS (ESI) calcd. For  $\text{C}_{26}\text{H}_{24}\text{FNNaO}_4$   $[\text{M}+\text{Na}]^+$ : 456.1582, found: 456.1584.

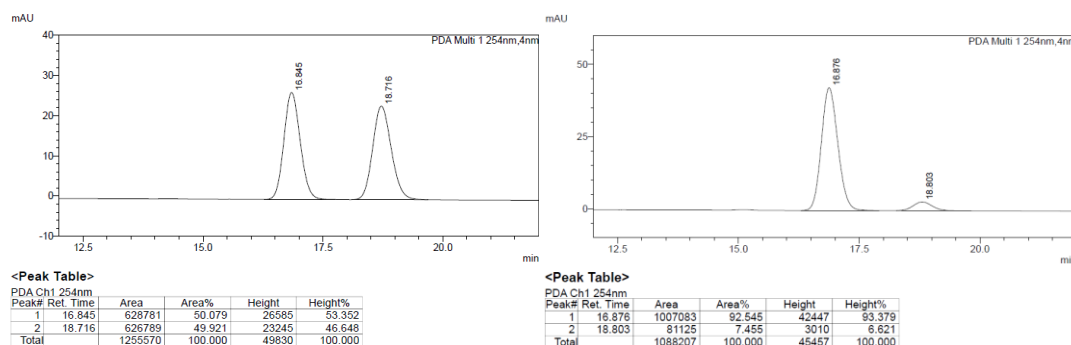

### 5.1.23 4-fluorophenyl (2*E*, 4*S*, 8*E*)-4-(1,3-dioxo-1,3,3a,4,7,7a-hexahydro-2*H*-isoindol-2-yl)-10-methylundeca-2,8-dienoate (**6al**).

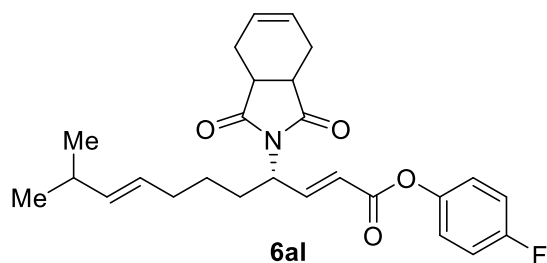

The general procedure was followed using **4a** (0.1 mmol) and **5l** (0.2 mmol). After purification by column chromatography (PE/EtOAc = 5:1), **6al** (29.0 mg, 68%) was obtained.  $[\alpha]_D^{22} = 17.2$  (*c* 0.25, acetone);  $^1\text{H}$  NMR (400 MHz,  $\text{CDCl}_3$ )  $\delta$  7.20 (dd,  $J = 15.6, 6.0$  Hz, 1H), 7.06 (d,  $J = 6.0$  Hz, 4H), 5.99 (dd,  $J = 15.6, 1.2$  Hz, 1H), 5.95 – 5.92 (m, 2H), 5.47 – 5.21 (m, 2H), 4.83 – 4.72 (m, 1H), 3.16 – 3.06 (m, 2H), 2.65 (d,  $J = 15.6$  Hz, 2H), 2.28 – 2.17 (m, 3H), 2.16 – 2.04 (m, 1H), 2.03 – 1.91 (m, 2H), 1.87 – 1.76 (m, 1H), 1.28 – 1.22 (m, 2H), 0.96 (d,  $J = 6.4$  Hz, 6H);  $^{13}\text{C}$  NMR (100 MHz,  $\text{CDCl}_3$ )  $\delta$  179.60 (d,  $J = 9.6$  Hz), 164.20, 161.43, 159.00, 146.40, 146.35 (d,  $J = 2.9$  Hz), 138.56, 128.03, 125.88, 122.91 (d,  $J = 8.5$  Hz), 121.69, 116.16, 115.92, 52.42, 39.01 (d,  $J = 12.4$  Hz), 31.60, 30.97, 29.76, 25.99, 23.65, 22.61; Enantiomeric excess: 90%, determined by HPLC (Chiralpak OD-H, hexane/*i*-PrOH = 85/15; flow rate 0.8 ml/min; 25 °C; 210 nm), first peak:  $t_R = 19.0$  min, second peak:  $t_R = 30.0$  min. HRMS (ESI) calcd. For  $\text{C}_{26}\text{H}_{30}\text{FNNaO}_4$   $[\text{M}+\text{Na}]^+$ : 462.2057, found: 462.2051.

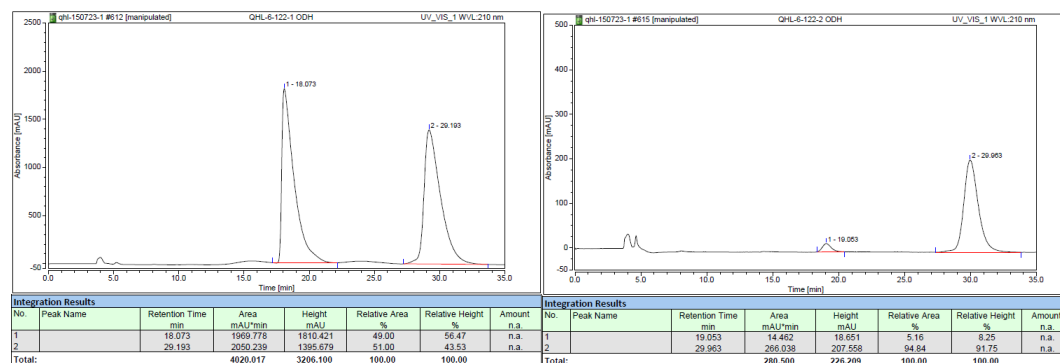

#### 5.1.24 4-fluorophenyl-(2*E*, 4*S*, 11*E*)-4-(1,3-dioxo-1,3,3*a*,4,7,7*a*-hexahydro-2*H*-isoindol-2-yl)icosa-2,11-dienoate (**6am**).

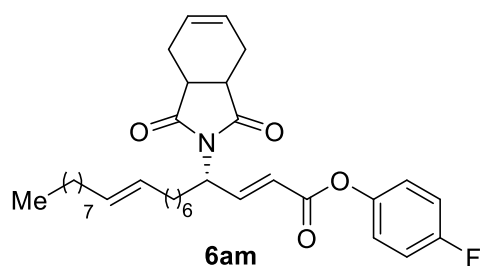

The general procedure was followed using **4a** (0.1 mmol) and **5m** (0.2 mmol). After purification by column chromatography (PE/EtOAc = 5:1), **6am** (47.4 mg, 86%) was obtained.  $[\alpha]_D^{25} = 6.0$  ( $c$  0.25, acetone);  $^1\text{H}$  NMR (400 MHz,  $\text{CDCl}_3$ )  $\delta$  7.21 (dd,  $J = 16.0, 6.4$  Hz, 1H), 7.05 (d,  $J = 6.0$  Hz, 4H), 5.99 (dd,  $J = 15.6, 1.2$  Hz, 1H), 5.96 – 5.89 (m, 2H), 5.40 – 5.29 (m, 2H), 4.77 (dt,  $J = 10.0, 6.0$  Hz, 1H), 3.16 – 3.06 (m, 2H), 2.65 (d,  $J = 15.2$  Hz, 2H), 2.23 (dd,  $J = 14.4, 6.0$  Hz, 2H), 2.16 – 2.06 (m, 1H), 2.06 – 1.92 (m, 4H), 1.87 – 1.75 (m, 1H), 1.38 – 1.19 (m, 20H), 0.87 (t,  $J = 6.4$  Hz, 3H);  $^{13}\text{C}$  NMR (100 MHz,  $\text{CDCl}_3$ )  $\delta$  179.58 (d,  $J = 10.1$  Hz), 164.17, 161.41, 158.98, 146.44, 146.34 (d,  $J = 2.8$  Hz), 130.07, 129.55, 127.99, 122.89 (d,  $J = 8.5$  Hz), 121.66, 116.13, 115.89, 52.57, 38.97 (d,  $J = 12.0$  Hz), 31.86, 30.40, 29.72, 29.65 (d,  $J = 0.9$  Hz), 29.55 (d,  $J = 2.4$  Hz), 29.48, 29.44, 29.03, 28.79, 27.14 (d,  $J = 10.5$  Hz), 26.06, 23.62 (d,  $J = 1.5$  Hz), 22.59 (d,  $J = 10.7$  Hz), 14.08; Enantiomeric excess: 90%, determined by HPLC (Chiralpak IB, hexane/*i*-PrOH = 90/10; flow rate 0.8 ml/min; 25 °C; 254 nm), first peak:  $t_R = 20.4$  min, second peak:  $t_R = 22.7$  min. HRMS (ESI) calcd. For  $\text{C}_{34}\text{H}_{46}\text{FNNaO}_4$   $[\text{M}+\text{Na}]^+$ : 574.3303, found: 574.3323.

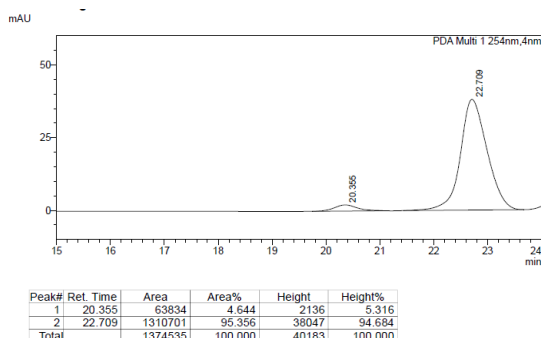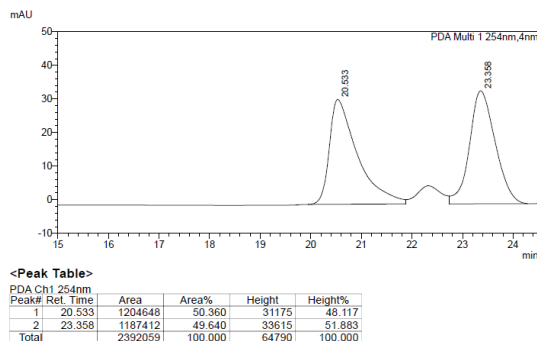

### 5.1.25 4-fluorophenyl (4*S*, *E*)-4-(1,3-dioxo-1,3,3a,4,7,7a-hexahydro-2*H*-isoindol-2-yl)trideca-2,12-dienoate (**6an**).

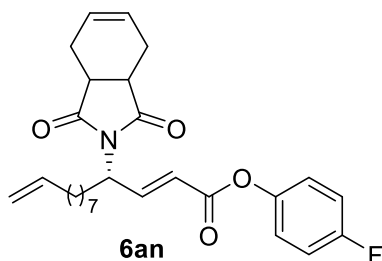

The general procedure was followed using **4a** (0.1 mmol) and **5n** (0.2 mmol). After purification by column chromatography (PE/EtOAc = 6:1), **6an** (34.8mg, 77%) was obtained.  $[\alpha]_D^{25} = 7.2$  ( $c$  0.25, acetone);  $^1\text{H}$  NMR (400 MHz,  $\text{CDCl}_3$ )  $\delta$  7.21 (dd,  $J = 15.6, 6.0$  Hz, 1H), 7.05 (d,  $J = 6.4$  Hz, 4H), 5.98 (dd,  $J = 15.6, 1.2$  Hz, 1H), 5.96 – 5.90 (m, 2H), 5.80 (ddt,  $J = 17.2, 10.4, 6.8$  Hz, 1H), 4.95 (ddd,  $J = 18.8, 17.2, 1.6$  Hz, 2H), 4.82 – 4.71 (m, 1H), 3.17 – 3.05 (m, 2H), 2.65 (dd,  $J = 10.4, 4.4$  Hz, 2H), 2.23 (dd,  $J = 14.8, 6.8$  Hz, 2H), 2.14 – 2.06 (m, 1H), 2.03 (dd,  $J = 14.4, 6.8$  Hz, 2H), 1.86 – 1.74 (m, 1H), 1.36 – 1.17 (m, 10H);  $^{13}\text{C}$  NMR (100 MHz,  $\text{CDCl}_3$ )  $\delta$  179.60 (d,  $J = 10.0$  Hz), 164.19, 161.39, 158.96, 146.44, 146.30 (d,  $J = 2.8$  Hz), 139.04, 127.99, 122.88 (d,  $J = 8.4$  Hz), 121.63, 116.13, 115.90, 114.19, 52.56, 38.96 (d,  $J = 12.1$  Hz), 33.71, 30.37, 29.20, 28.87, 28.78, 26.04, 23.62 (d,  $J = 1.7$  Hz); Enantiomeric excess: 90%, determined by HPLC (Chiralpak OD-H, hexane/*i*-PrOH = 90/10; flow rate 0.8 ml/min; 25 °C; 210 nm), first peak:  $t_R = 36.6$  min, second peak:  $t_R = 42.8$  min. HRMS (ESI) calcd. For  $\text{C}_{27}\text{H}_{32}\text{FNNaO}_4$   $[\text{M}+\text{Na}]^+$ : 476.2208, found: 476.2219.

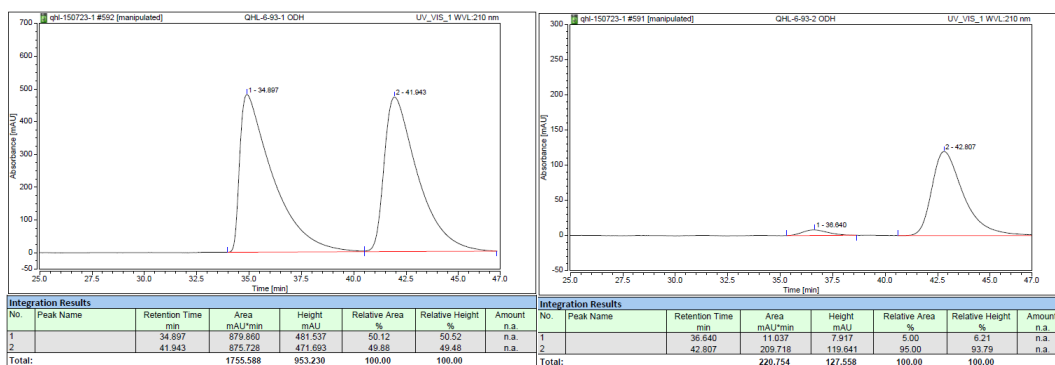

### 5.1.26 ethyl (S,E)-4-(1,3-dioxoisindolin-2-yl)hex-2-enoate (**6lo**).

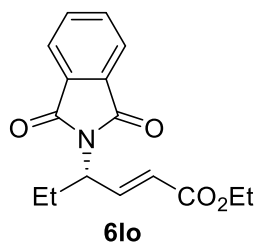

The general procedure was followed using **4l** (1.0 mmol) and **2a** (2.0 mmol). After purification by column chromatography (PE/EtOAc = 5:1), **6lo** (258.1mg, 90%) was obtained.  $[\alpha]_D^{22} = -7.9$  ( $c$  0.20,  $\text{CHCl}_3$ );  $^1\text{H}$  NMR (400 MHz,  $\text{CDCl}_3$ )  $\delta$  7.89 – 7.78 (m, 2H), 7.78 – 7.64 (m, 2H), 7.14 (dd,  $J = 15.8, 6.8$  Hz, 1H), 5.90 (dd,  $J = 16.0, 1.6$  Hz, 1H), 4.82 – 4.74 (m, 1H), 4.15 (q,  $J = 7.1$  Hz, 2H), 2.27 – 2.08 (m, 1H), 2.08 – 1.92 (m, 1H), 1.24 (t,  $J = 7.2$  Hz, 3H), 0.91 (t,  $J = 7.2$  Hz, 3H);  $^{13}\text{C}$  NMR (101 MHz,  $\text{CDCl}_3$ )  $\delta$  167.79, 165.86, 144.22, 134.14, 131.72, 123.37, 123.11, 60.56, 53.43, 24.71, 14.18, 10.88; Enantiomeric excess: 88%, determined by HPLC (Chiralpak AD-H, hexane/*i*-PrOH = 95/05; flow rate 0.8 ml/min; 25 °C; 290 nm), first peak:  $t_R = 17.2$  min, second peak:  $t_R = 19.7$  min. HRMS (ESI) calcd. For  $\text{C}_{16}\text{H}_{17}\text{NNaO}_4$   $[\text{M}+\text{Na}]^+$ : 310.1050, found: 310.1055.

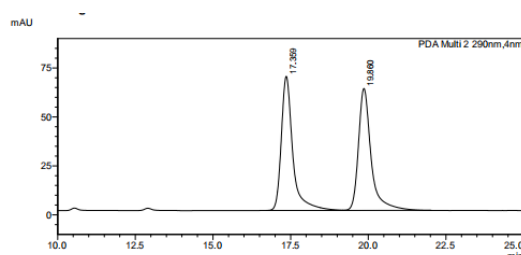

<Peak Table>  
PDA Ch2 290nm

| Peak# | Ret. Time | Area    | Area%   | Height | Height% |
|-------|-----------|---------|---------|--------|---------|
| 1     | 17.359    | 1765733 | 49.970  | 68479  | 52.364  |
| 2     | 19.860    | 1767885 | 50.030  | 62295  | 47.636  |
| Total |           | 3533618 | 100.000 | 130774 | 100.000 |

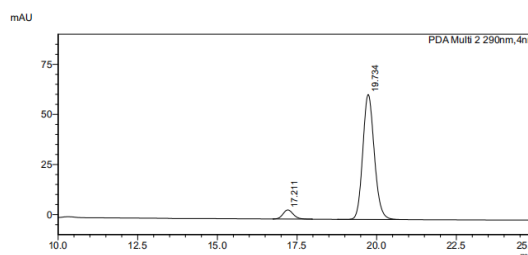

<Peak Table>  
PDA Ch2 290nm

| Peak# | Ret. Time | Area    | Area%   | Height | Height% |
|-------|-----------|---------|---------|--------|---------|
| 1     | 17.211    | 101904  | 6.095   | 4546   | 6.795   |
| 2     | 19.734    | 1570061 | 93.905  | 62355  | 93.205  |
| Total |           | 1671965 | 100.000 | 66901  | 100.000 |

## 5.2 General procedure for variation of TsNH<sub>2</sub> components.

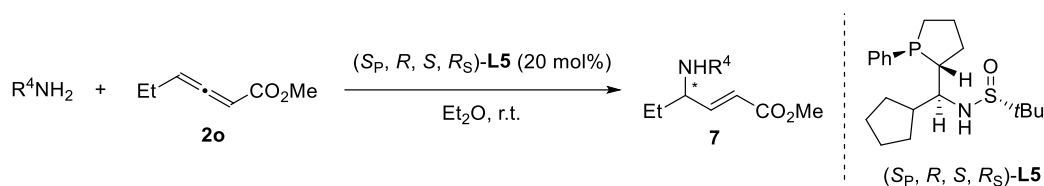

To a flame-dried glass tube with a magnetic stirring bar were added TsNH<sub>2</sub> (17.1 mg, 0.10 mmol) and (*S<sub>P</sub>*, *R*, *S*, *R<sub>S</sub>*)-**L5** (7.4 mg, 0.02 mmol), followed by the addition of dry Et<sub>2</sub>O (1.5 mL).<sup>[5]</sup> Then the allenolate **2o** (25.2 mg, 0.20 mmol) was slowly added via syringe at room temperature under inert atmosphere. The reaction mixture was stirred for 48 h, and TLC show that the reaction was completed. Then Et<sub>2</sub>O was removed under reduced pressure. The residue was purified by column chromatography on silica gel (petroleum ether/ethyl acetate = 2:1) to afford **7ao** (17.2 mg, 58% yield).

### 5.2.1 Methyl (*E*)-4-((4-methylphenyl)sulfonamido)hex-2-enoate (**7ao**).

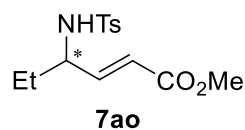

$[\alpha]^{22}_\text{D} = 40.2$  (*c* 0.33, CHCl<sub>3</sub>); <sup>1</sup>H NMR (500 MHz, CDCl<sub>3</sub>) δ 7.73 (d, *J* = 7.0 Hz, 2H), 7.31 – 7.26 (m, 2H), 6.60 (dd, *J* = 15.5, 6.5 Hz, 1H), 5.77 (d, *J* = 15.5 Hz, 1H), 5.02 (d, *J* = 7.5 Hz, 1H), 3.88 – 3.79 (m, 1H), 3.69 (s, 3H), 2.41 (s, 3H), 1.59 – 1.50 (m, 2H), 0.83 (t, *J* = 7.0 Hz, 3H); <sup>13</sup>C NMR (125 MHz, CDCl<sub>3</sub>) δ 166.29, 146.76, 143.60, 137.63, 129.68, 127.16, 121.69, 56.02, 51.64, 28.07, 21.51, 9.71; Enantiomeric excess: 87%, determined by HPLC (Chiralpak IF hexane/*i*-PrOH = 75/25; flow rate 0.7 ml/min; 25 °C; 254 nm), first peak: *t<sub>R</sub>* = 14.9 min, second peak: *t<sub>R</sub>* = 18.7 min. HRMS (ESI) calcd. for C<sub>14</sub>H<sub>19</sub>NNaO<sub>4</sub>S [M+Na]<sup>+</sup>: 320.0927, found: 320.0919.

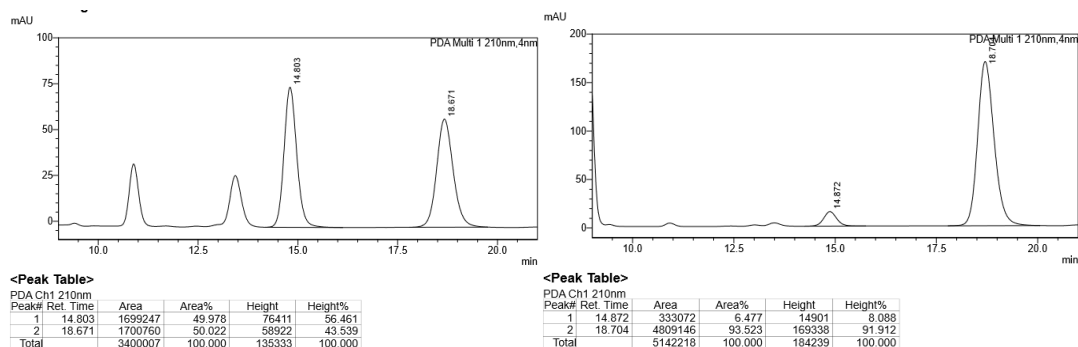

### 5.2.2 Methyl (*E*)-4-(phenylsulfonamido)hex-2-enoate (**7bo**).

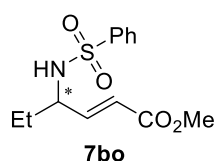

The general procedure was followed using  $\text{PhSO}_2\text{NH}_2$  (0.10 mmol) and **2o** (0.20 mmol). After purification by column chromatography (PE/EtOAc = 2:1), **7bo** (17.6 mg, 62%) was obtained.  $[\alpha]_D^{22} = 33.3$  ( $c$  0.33,  $\text{CHCl}_3$ );  $^1\text{H NMR}$  (500 MHz,  $\text{CDCl}_3$ )  $\delta$  7.88 – 7.84 (m, 2H), 7.58 – 7.54 (m, 1H), 7.53 – 7.47 (m, 2H), 6.60 (dd,  $J = 15.5, 6.5$  Hz, 1H), 5.81 – 5.74 (m, 1H), 5.15 – 5.05 (m, 1H), 3.91 – 3.83 (m, 1H), 3.68 (s, 3H), 1.59 – 1.50 (m, 2H), 0.83 (t,  $J = 7.5$  Hz, 3H);  $^{13}\text{C NMR}$  (125 MHz,  $\text{CDCl}_3$ )  $\delta$  166.26, 146.65, 140.65, 132.74, 129.11, 127.07, 121.75, 56.10, 51.67, 28.09, 9.71. Enantiomeric excess: 86%, determined by HPLC (Chiralpak IF hexane/*i*-PrOH = 75/25; flow rate 0.7 ml/min; 25 °C; 254 nm), first peak:  $t_R = 13.7$  min, second peak:  $t_R = 17.1$  min. HRMS (ESI) calcd. for  $\text{C}_{13}\text{H}_{17}\text{NNaO}_4\text{S} [\text{M}+\text{Na}]^+$ : 306.0770, found: 306.0764.

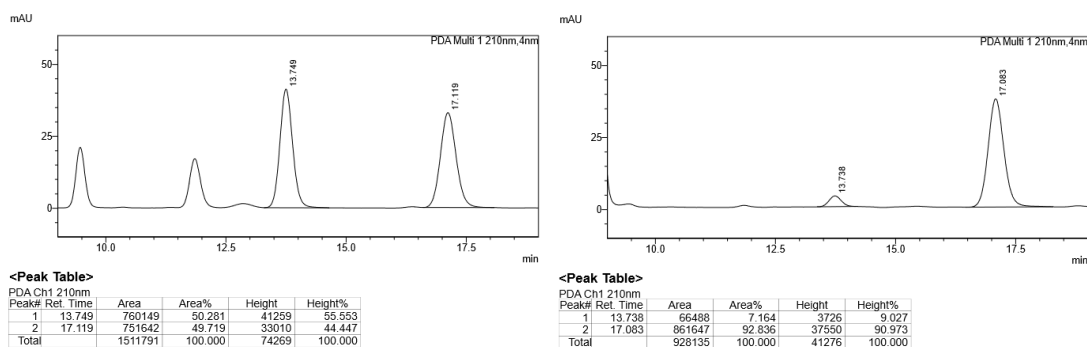

### 5.3 General procedure for $(\text{BocNH})_2$ .

**Di-tert-butyl (*E*)-1-(6-(benzyloxy)-6-oxohex-4-en-3-yl)hydrazine-1,2-dicarboxylate (**9**).**

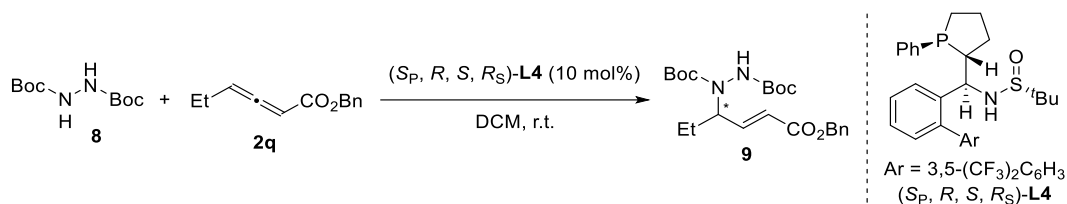

To a flame-dried glass tube with a magnetic stirring bar were added (BocNH)<sub>2</sub> **8** (23.2 mg, 0.10 mmol) and (*S<sub>P</sub>, R, S, R<sub>S</sub>*)-**L4** (5.9 mg, 0.01 mmol), followed by the addition of dry DCM (1.5 mL).<sup>[5]</sup> Then the allenolate **2q** (40.4 mg, 0.20 mmol) was slowly added via syringe at room temperature under inert atmosphere. The reaction mixture was stirred for 48 h, and TLC show that the reaction was completed. Then DCM was removed under reduced pressure. The residue was purified by column chromatography on silica gel (petroleum ether/ethyl acetate = 5:1) to afford **9** (38.2 mg, 88% yield). [α]<sup>22</sup><sub>D</sub> = 6.44 (c 0.33, CHCl<sub>3</sub>); <sup>1</sup>H NMR (300 MHz, CDCl<sub>3</sub>) δ 7.39 – 7.32 (m, 5H), 6.93 (dd, *J* = 15.6, 6.6 Hz, 1H), 6.24 (s, 1H), 5.96 (d, *J* = 15.6 Hz, 1H), 5.18 (s, 2H), 4.69 (s, 1H), 1.52 – 1.36 (m, 20H), 0.99 – 0.88 (m, 3H); <sup>13</sup>C NMR (125 MHz, CDCl<sub>3</sub>) δ 166.11, 154.77, 146.36, 135.91, 128.41 (d, *J* = 34.1 Hz), 122.17, 81.66, 66.32, 28.20, 24.34, 10.78. Enantiomeric excess: 83%, determined by HPLC (Chiralpak IF hexane/*i*-PrOH = 85/15; flow rate 0.8 ml/min; 25 °C; 254 nm), first peak: tR = 16.8 min, second peak: tR = 18.7 min. HRMS (ESI) calcd. for C<sub>23</sub>H<sub>34</sub>N<sub>2</sub>NaO<sub>6</sub> [M+Na]<sup>+</sup>: 457.2309, found: 457.2299.

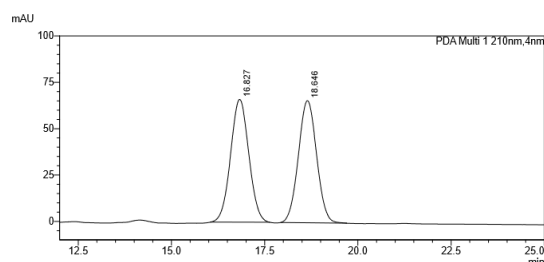

| <Peak Table>  |           |         |         |        |         |
|---------------|-----------|---------|---------|--------|---------|
| PDA Ch1 210nm |           |         |         |        |         |
| Peak#         | Ret. Time | Area    | Area%   | Height | Height% |
| 1             | 16.827    | 2259479 | 50.204  | 66255  | 50.142  |
| 2             | 18.646    | 2241160 | 49.796  | 65880  | 49.858  |
| Total         |           | 4500640 | 100.000 | 132135 | 100.000 |

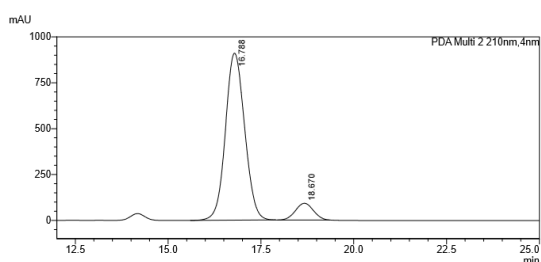

| <Peak Table>  |           |          |         |         |         |
|---------------|-----------|----------|---------|---------|---------|
| PDA Ch2 210nm |           |          |         |         |         |
| Peak#         | Ret. Time | Area     | Area%   | Height  | Height% |
| 1             | 16.788    | 32841497 | 91.429  | 910554  | 90.914  |
| 2             | 18.670    | 3078839  | 8.571   | 91005   | 9.086   |
| Total         |           | 35920337 | 100.000 | 1001559 | 100.000 |

## 5.4 General procedure for pyrazole.

### Ethyl (*E*)-4-(1H-pyrazol-1-yl)pent-2-enoate



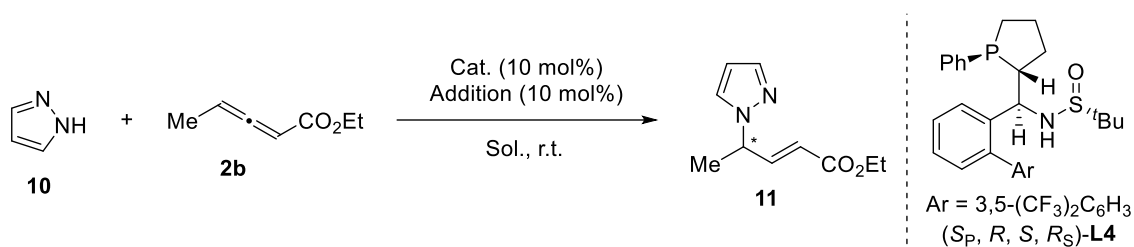

To a flame-dried glass tube with a magnetic stirring bar were added pyrazole **10** (6.8 mg, 0.10 mmol) and (S<sub>P</sub>, R, S, R<sub>S</sub>)-**L4** (5.9 mg, 0.01 mmol), followed by the addition of dry dioxane (1.5 mL) and CH<sub>3</sub>COOH (0.60 mg, 0.01 mmol). Then the allenolate **2b** (37.8 mg, 0.30 mmol) was slowly added via syringe at room temperature under inert atmosphere. The reaction mixture was stirred for 24 h, and TLC show that the reaction was completed. Then dioxane was removed under reduced pressure. The residue was purified by column chromatography on silica gel (petroleum ether/ethyl acetate = 2:1) to afford **11** (16.5 mg, 85% yield). [α]<sup>22</sup><sub>D</sub> = -1.44 (*c* 0.50, CHCl<sub>3</sub>); <sup>1</sup>H NMR (300 MHz, CDCl<sub>3</sub>) δ 7.54 (d, *J* = 1.5 Hz, 1H), 7.42 (d, *J* = 2.1 Hz, 1H), 7.04 (dd, *J* = 15.6, 5.4 Hz, 1H), 6.29 (t, *J* = 2.1 Hz, 1H), 5.64 (dd, *J* = 15.6, 1.5 Hz, 1H), 5.18 – 5.01 (m, 1H), 4.16 (q, *J* = 7.2 Hz, 2H), 1.69 (d, *J* = 6.9 Hz, 3H), 1.25 (t, *J* = 7.2 Hz, 3H); <sup>13</sup>C NMR (100 MHz, CDCl<sub>3</sub>) δ 165.79, 146.90, 139.39, 127.32, 121.82, 105.69, 60.52, 57.79, 19.58, 14.06; Enantiomeric excess: 95%, determined by HPLC (Chiralpak ODH, hexane/*i*-PrOH = 90/10; flow rate 0.8 ml/min; 25 °C; 210 nm), first peak: t<sub>R</sub> = 10.6 min, second peak: t<sub>R</sub> = 11.9 min.

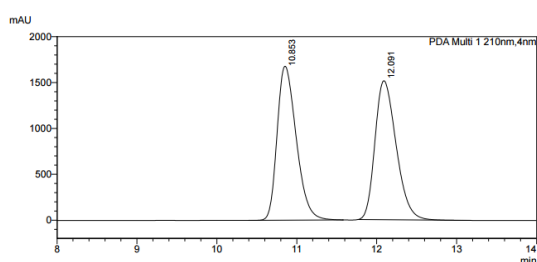

<Peak Table>

| Peak# | Ret. Time | Area     | Area%   | Height  | Height% |
|-------|-----------|----------|---------|---------|---------|
| 1     | 10.653    | 27924162 | 49.961  | 1677730 | 52.549  |
| 2     | 12.091    | 27968019 | 50.039  | 1514938 | 47.451  |
| Total |           | 55892181 | 100.000 | 3192668 | 100.000 |

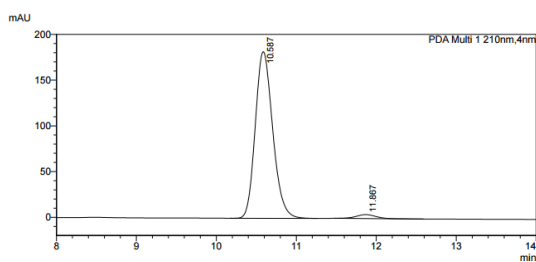

<Peak Table>

| Peak# | Ret. Time | Area    | Area%   | Height | Height% |
|-------|-----------|---------|---------|--------|---------|
| 1     | 10.657    | 2766079 | 97.415  | 182049 | 97.699  |
| 2     | 11.867    | 73407   | 2.585   | 4288   | 2.301   |
| Total |           | 2839486 | 100.000 | 186336 | 100.000 |

## 5. Experimental procedure general datum and HPLC spectra for the transformations of **3ga**, **6aa** and **6lo**.

### 6.1 Hydrolysis of **3ga**:<sup>[6]</sup>

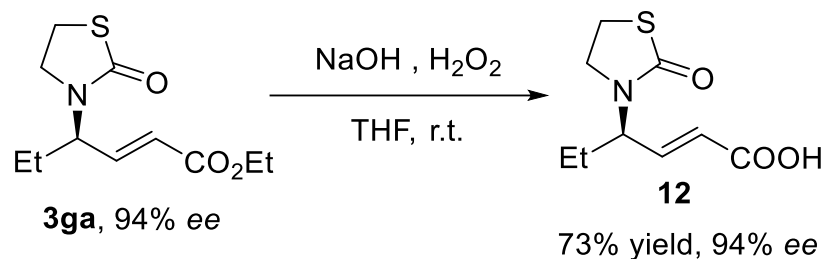

30%  $\text{H}_2\text{O}_2$  (0.10 mL) and aqueous NaOH (0.40 mmol, 0.50 mL  $\text{H}_2\text{O}$ ) were added to a solution of **3ga** (49.0 mg, 0.20 mmol) in THF (1.0 mL) at 0 °C. The reaction mixture was stirred at room temperature for 2 h until the disappearance of **3ga** as indicated by TLC, quenched with saturated sodium thiosulfate solution (5.0 mL), stirred for another 15 min, acidified with 2 N HCl, extracted with EtOAc ( $3 \times 5$  mL), dried over  $\text{Na}_2\text{SO}_4$ , filtered, concentrated, and purified by flash chromatography (silica gel, DCM/MeOH = 10/1 as eluent) to give acid **12** (31.3 mg, 73%).  $[\alpha]_{\text{D}}^{22} = -2.6$  ( $c$  0.25, acetone);  $^1\text{H}$  NMR (400 MHz,  $\text{CDCl}_3$ )  $\delta$  10.05 (s, 1H), 6.91 (dd,  $J = 16.0, 5.6$  Hz, 1H), 5.91 (dd,  $J = 15.6, 0.8$  Hz, 1H), 4.75 – 4.66 (m, 1H), 3.54 (t,  $J = 7.2$  Hz, 2H), 3.37 – 3.21 (m, 2H), 1.81 – 1.60 (m, 2H), 0.95 (t,  $J = 7.2$  Hz, 3H);  $^{13}\text{C}$  NMR (101 MHz,  $\text{CDCl}_3$ )  $\delta$  172.70, 170.45, 147.04, 122.31, 55.53, 44.23, 26.06, 24.20, 10.60; Enantiomeric excess (determined by transformed to methyl ester) : 94%, determined by HPLC (Chiralpak IF hexane/*i*-PrOH = 85/15; flow rate 0.6 mL/min; 25 °C; 254 nm), first peak:  $t_{\text{R}} = 32.0$  min, second peak:  $t_{\text{R}} = 36.5$  min. HRMS (ESI) calcd. for  $\text{C}_9\text{H}_{13}\text{NNaO}_3\text{S}$   $[\text{M}+\text{Na}]^+$ : 238.0508, found: 238.0503.

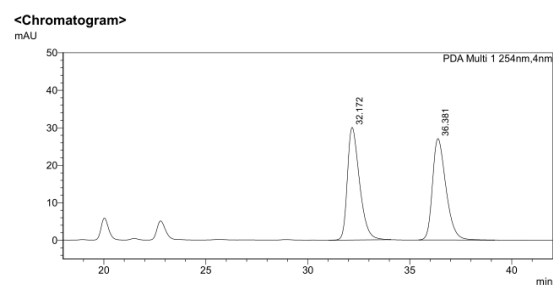

<Peak Table>  
PDA Ch1 254nm

| Peak# | Ret. Time | Area    | Area%   | Height | Height% |
|-------|-----------|---------|---------|--------|---------|
| 1     | 32.172    | 1241944 | 50.020  | 30029  | 52.608  |
| 2     | 36.381    | 1240962 | 49.980  | 27052  | 47.392  |
| Total |           | 2482906 | 100.000 | 57081  | 100.000 |

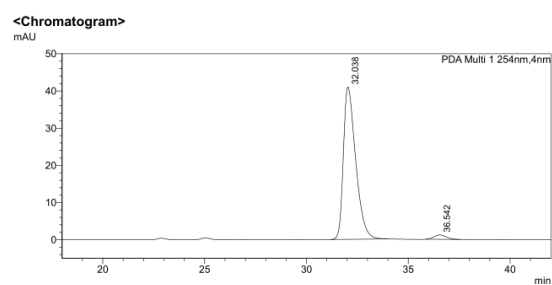

<Peak Table>  
PDA Ch1 254nm

| Peak# | Ret. Time | Area    | Area%   | Height | Height% |
|-------|-----------|---------|---------|--------|---------|
| 1     | 32.038    | 1719002 | 97.185  | 40992  | 97.196  |
| 2     | 36.542    | 49787   | 2.815   | 1182   | 2.804   |
| Total |           | 1768789 | 100.000 | 42174  | 100.000 |

## 6.2 Synthesis of **13**:

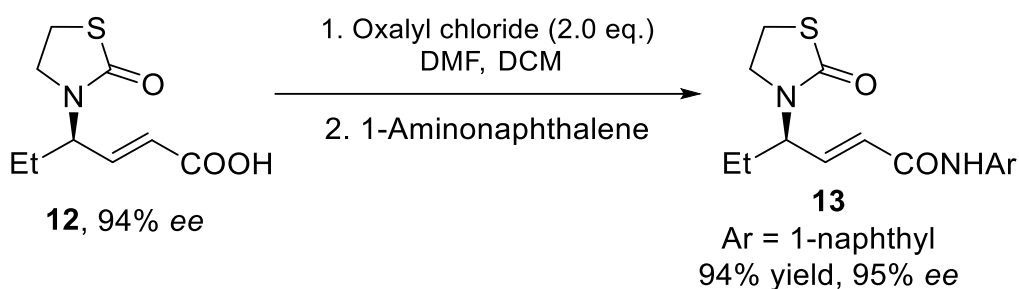

A dichloromethane solution of **12** (43.0 mg, 0.20 mmol) and N,N-Dimethylformamide (10  $\mu$ L) was stirred at room temperature. Oxalyl chloride (34  $\mu$ L, 0.40 mmol) was slowly added to the solution and stirred for 1h until the disappearance of **12** as indicated by TLC. The solvent was removed under reduced pressure. The crude product was dissolved by dichloromethane, and a dichloromethane solution of 1-aminonaphthalene (43 mg, 0.30 mmol) was added and the mixture was stirred for another 2h. The solvent was removed under reduced pressure and the resulting solid was purified by flash column chromatography in petroleum ether/EtOAc (3:1) to afford **13** (64 mg, 94%) as a white solid.  $[\alpha]_D^{22} = -3.0$  (*c* 0.25, acetone);  $^1\text{H}$  NMR (400 MHz,  $\text{CDCl}_3$ )  $\delta$  8.66 (s, 1H), 7.93 (dd, *J* = 6.4, 3.6 Hz, 1H), 7.91 – 7.86 (m, 1H), 7.83 (s, 1H), 7.67 (d, *J* = 8.0 Hz, 1H), 7.49 – 7.40 (m, 3H), 6.82 (dd, *J* = 15.6, 6.4 Hz, 1H), 6.35 (d, *J* = 15.2 Hz, 1H), 4.68 (d, *J* = 6.0 Hz, 1H), 3.57 – 3.39 (m, 2H), 3.32 – 3.13 (m, 2H), 1.65 – 1.52 (m, 2H), 0.86 (t, *J* = 6.8 Hz, 4H);  $^{13}\text{C}$  NMR (100 MHz,  $\text{CDCl}_3$ )  $\delta$  172.71, 164.20, 141.26, 134.10, 132.53, 128.53, 127.45, 126.10 (d, *J* = 20.3 Hz), 125.64, 121.40 (d, *J* = 24.4 Hz), 55.88, 44.07, 26.16, 24.85, 10.65; Enantiomeric excess: 95%, determined by HPLC (Chiralpak IF hexane/*i*-PrOH = 60/40; flow rate 0.8 ml/min; 25  $^\circ\text{C}$ ; 190 nm), first peak:  $t_R$  = 10.8 min, second peak:  $t_R$  = 13.7 min. HRMS (ESI) calcd. for  $\text{C}_{19}\text{H}_{20}\text{N}_2\text{NaO}_2\text{S}$   $[\text{M}+\text{Na}]^+$  : 363.1138, found: 363.1142.

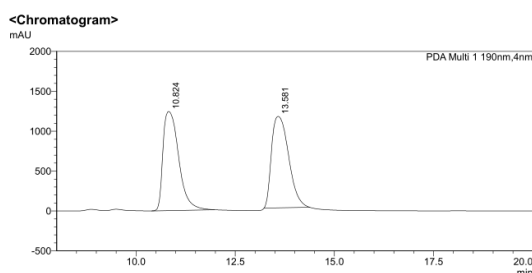

<Peak Table>

| Peak# | Ret. Time | Area     | Area%   | Height  | Height% |
|-------|-----------|----------|---------|---------|---------|
| 1     | 10.824    | 34362921 | 49.973  | 1242494 | 52.003  |
| 2     | 13.581    | 34400234 | 50.027  | 1146777 | 47.997  |
| Total |           | 68763155 | 100.000 | 2389271 | 100.000 |

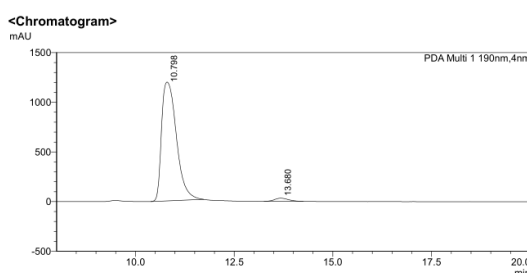

<Peak Table>

| Peak# | Ret. Time | Area     | Area%   | Height  | Height% |
|-------|-----------|----------|---------|---------|---------|
| 1     | 10.798    | 31311924 | 97.599  | 1195936 | 97.427  |
| 2     | 13.680    | 770151   | 2.401   | 31580   | 2.573   |
| Total |           | 32082075 | 100.000 | 1227516 | 100.000 |

### 6.3 Synthesis of **14**:<sup>[7]</sup>

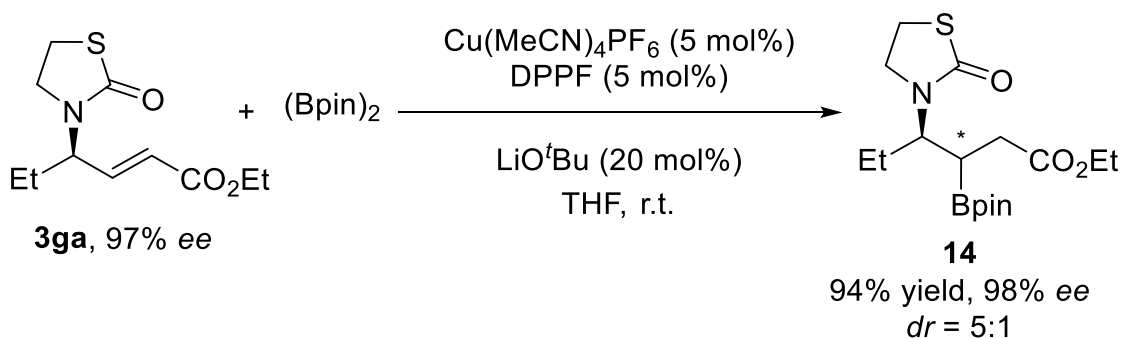

A solution of  $\text{Cu}(\text{MeCN})_4\text{PF}_6$  (4.0 mg, 0.01 mmol) and DPPF (5.0 mg, 0.01 mmol) in THF (1.0 mL) was stirred at room temperature for 30 minutes, **3ga** (49.0 mg, 0.20 mmol) was slowly added to the reaction followed by  $(\text{Bpin})_2$  (76.0 mg, 0.30 mmol) and the mixture stirred for an additional 30 minutes. Then 0.04 mmol lithium *tert*-butoxide (1.0 M in hexane) was added and the solution was stirred for another 2h. The solvent was removed under reduced pressure and the resulting solid was purified by flash column chromatography in petroleum ether/EtOAc (5:1) to afford **14** (46.0 mg, 94%, *dr* = 5:1) as a colorless oil.  $[\alpha]_D^{22} = 27.9$  (*c* 0.25, acetone);  $^1\text{H}$  NMR (400 MHz,  $\text{CDCl}_3$ )  $\delta$  4.12 – 4.03 (m, 2H), 4.04 – 3.97 (m, 1H), 3.78 – 3.71 (m, 1H), 3.45 – 3.36 (m, 1H), 3.31 – 3.22 (m, 1H), 3.16 – 3.09 (m, 1H), 2.52 – 2.34 (m, 2H), 1.72 – 1.61 (m, 1H), 1.61 – 1.53 (m, 1H), 1.44 – 1.34 (m, 1H), 1.23 – 1.18 (m, 15H), 0.82 (t, *J* = 7.2 Hz, 3H);  $^{13}\text{C}$  NMR (100 MHz,  $\text{CDCl}_3$ )  $\delta$  173.58, 171.85, 83.50, 60.48, 56.27, 44.01, 33.90, 25.97, 24.95, 24.80, 24.53, 14.23, 10.69; Enantiomeric excess: 98%, determined by HPLC (Chiralpak IC, hexane/*i*-PrOH = 93/7; flow rate 0.8 ml/min; 25 °C; 210 nm), first peak:  $t_R$  = 38.4 min, second peak:  $t_R$  = 41.2 min, third peak:  $t_R$  =

50.1 min. HRMS (ESI) calcd. For  $C_{17}H_{30}BNNaO_5S$   $[M+Na]^+$ : 394.1833, found: 394.1829.

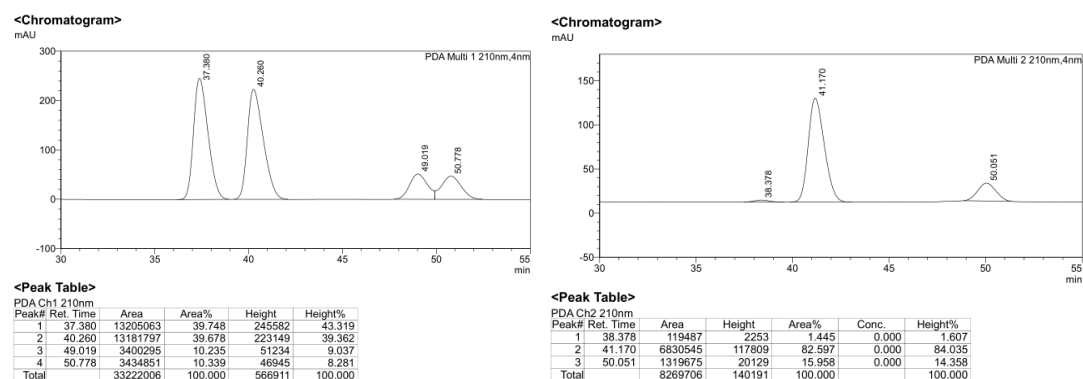

#### 6.4 Reduction of the double bond of **3aa**:

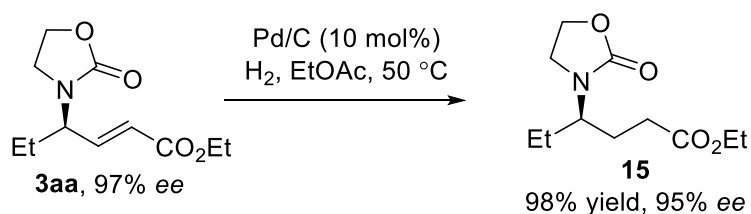

A suspension of **3aa** (22.7 mg, 0.10 mmol) and 10% palladium on carbon (15.5 mg) in EtOAc (2.0 mL) was maintained under an atmosphere of hydrogen gas for 8 h at 50 °C. The insoluble solids were removed by filtration and the filtrate was concentrated to provide product **15** (22.5 mg, 98%) without any purification.  $[\alpha]^{22}_D = 1.04$  ( $c$  0.50,  $CHCl_3$ );  $^1H$  NMR (300 MHz,  $CDCl_3$ )  $\delta$  4.34 – 4.17 (m, 2H), 4.04 (q,  $J = 6.9$  Hz, 2H), 3.70 – 3.54 (m, 1H), 3.46 – 3.27 (m, 2H), 2.36 – 2.13 (m, 2H), 1.82 – 1.63 (m, 2H), 1.56 – 1.34 (m, 2H), 1.17 (t,  $J = 7.2$  Hz, 3H), 0.83 (t,  $J = 7.2$  Hz, 3H);  $^{13}C$  NMR (100 MHz,  $CDCl_3$ )  $\delta$  172.94, 158.46, 61.87, 60.35, 54.67, 39.24, 31.08, 27.02, 25.27, 13.99, 10.54; Enantiomeric excess: 95%, determined by HPLC (Chiralpak IF, hexane/*i*-PrOH = 80/20; flow rate 0.7 ml/min; 25 °C; 210 nm), first peak:  $t_R = 18.1$  min, second peak:  $t_R = 19.3$  min. HRMS (ESI) calcd. For  $C_{11}H_{19}NNaO_4$   $[M+Na]^+$ : 252.1209, found: 252.1206.

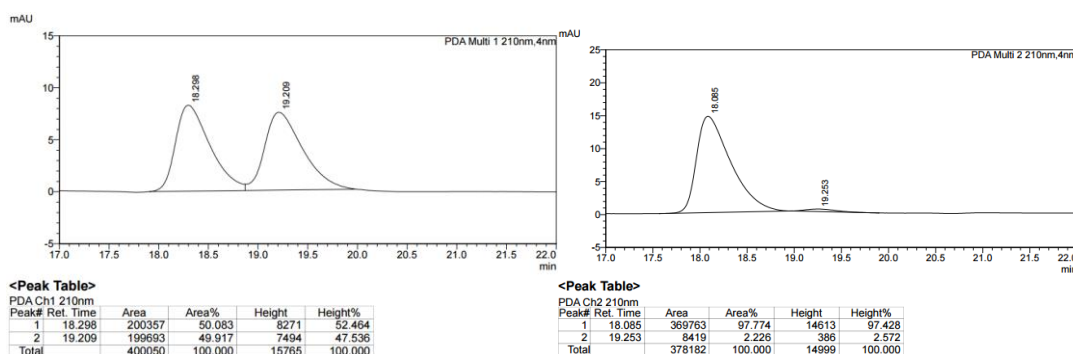

## 6.5 Ring opening of **15**:

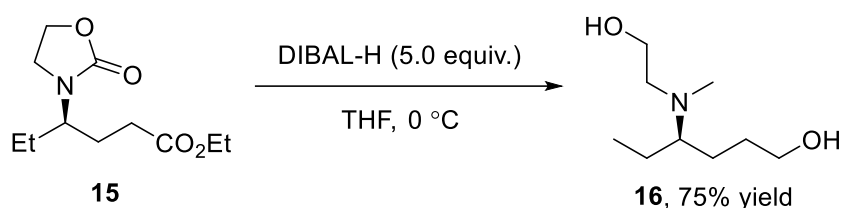

To a flame-dried glass tube with a magnetic stirring bar was added **15** (229.2 mg, 1.0 mmol) in THF (3.0 mL), stirring at 0 °C for 10 minutes. DIBAL-H (5.0 mmol, 1.5 mol/L in toluene) was slowly added to the reaction and the solution was stirred for another 1h at the same temperature. Potassium sodium tartrate saturated solution was added to the solution and the reaction mixture was stirred overnight, extracted with EtOAc (3 × 10 mL), dried over Na<sub>2</sub>SO<sub>4</sub>, filtered, concentrated, and purified by flash chromatography (silica gel, DCM/MeOH = 10/1 as eluent) to give **16** (131.5 mg, 75%).  $[\alpha]^{22}_{\text{D}} = -22.10$  (*c* 0.20, CHCl<sub>3</sub>); <sup>1</sup>H NMR (300 MHz, CDCl<sub>3</sub>) δ 5.16 (s, 2H), 3.83 – 3.49 (m, 4H), 2.93 – 2.77 (m, 1H), 2.76 – 2.62 (m, 1H), 2.62 – 2.47 (m, 1H), 2.41 (s, 3H), 1.88 – 1.49 (m, 5H), 1.31 – 1.20 (m, 1H), 0.97 (t, *J* = 7.4 Hz, 3H); <sup>13</sup>C NMR (101 MHz, CDCl<sub>3</sub>) δ 66.07, 61.43, 57.17, 54.63, 35.59, 29.94, 27.29, 20.17, 10.89; HRMS (ESI) calcd. For C<sub>9</sub>H<sub>22</sub>NO<sub>2</sub> [M+H]<sup>+</sup>: 176.1645, found: 176.1644.

## 6.6 Synthesis of **17**:

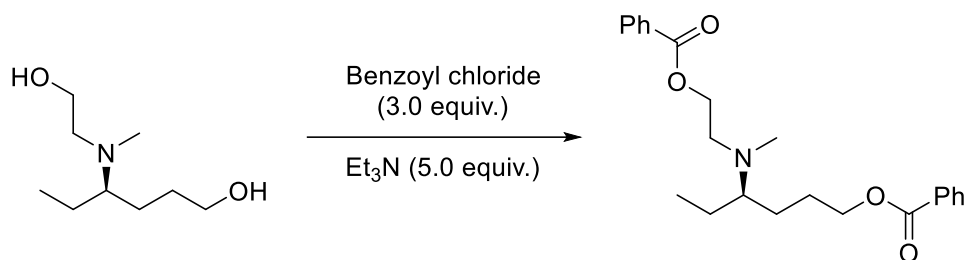

A dichloromethane solution of **16** (87.6 mg, 0.50 mmol) and 0.3 mL Et<sub>3</sub>N was stirred at room temperature. Benzoyl chloride (210.9 mg, 1.50 mmol) was slowly added to the solution and stirred for 30 minutes until the disappearance of **16** as indicated by TLC. The solvent was removed under reduced pressure and the resulting solid was purified by flash column chromatography in petroleum ether/EtOAc (2:1) to afford **17** (153.4 mg, 80%).  $[\alpha]_D^{22} = -8.23$  (*c* 0.40, CHCl<sub>3</sub>); <sup>1</sup>H NMR (400 MHz, CDCl<sub>3</sub>) δ 8.06 – 7.99 (m, 4H), 7.57 – 7.48 (m, 2H), 7.41 (dd, *J* = 16.8, 7.8 Hz, 4H), 4.37 (t, *J* = 6.0 Hz, 2H), 4.27 (t, *J* = 6.8 Hz, 2H), 2.90 – 2.75 (m, 2H), 2.40 (dt, *J* = 13.6, 6.4 Hz, 1H), 2.32 (s, 3H), 1.92 – 1.71 (m, 2H), 1.55 – 1.45 (m, 2H), 1.33 – 1.20 (m, 2H), 0.90 (t, *J* = 7.2 Hz, 3H); <sup>13</sup>C NMR (101 MHz, CDCl<sub>3</sub>) δ 166.65, 132.79 (d, *J* = 3.8 Hz), 130.49 (d, *J* = 10.5 Hz), 129.54 (d, *J* = 3.3 Hz), 128.31, 65.47, 65.21, 63.55, 52.31, 37.19, 26.68, 26.33, 22.44, 11.90; Enantiomeric excess: 92%, determined by HPLC (Chiralpak IF, hexane/*i*-PrOH = 98/02; flow rate 1.0 ml/min; 25 °C; 210 nm), first peak: *t*<sub>R</sub> = 13.2 min, second peak: *t*<sub>R</sub> = 13.8 min. HRMS (ESI) calcd. For C<sub>23</sub>H<sub>30</sub>NO<sub>4</sub> [M+H]<sup>+</sup>: 384.2169, found: 384.2170.

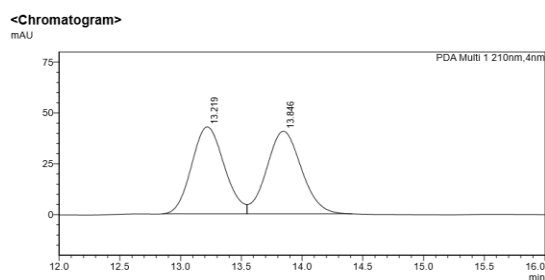

<Peak Table>  
PDA Ch1 210nm

| Peak# | Ret. Time | Area    | Area%   | Height | Height% |
|-------|-----------|---------|---------|--------|---------|
| 1     | 13.219    | 800287  | 49.768  | 42716  | 51.237  |
| 2     | 13.846    | 807751  | 50.232  | 40653  | 48.763  |
| Total |           | 1608039 | 100.000 | 83370  | 100.000 |

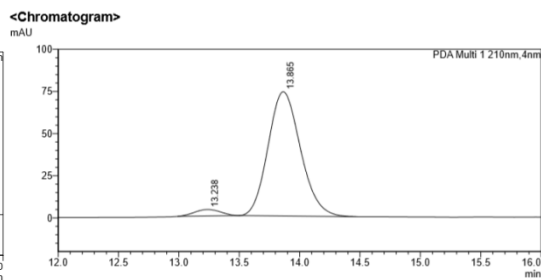

<Peak Table>  
PDA Ch1 210nm

| Peak# | Ret. Time | Area    | Area%   | Height | Height% |
|-------|-----------|---------|---------|--------|---------|
| 1     | 13.238    | 57120   | 3.975   | 3788   | 4.889   |
| 2     | 13.865    | 1379698 | 96.025  | 73699  | 95.111  |
| Total |           | 1436818 | 100.000 | 77487  | 100.000 |

## 6.7 Selective epoxidation of 6aa:<sup>[8]</sup>

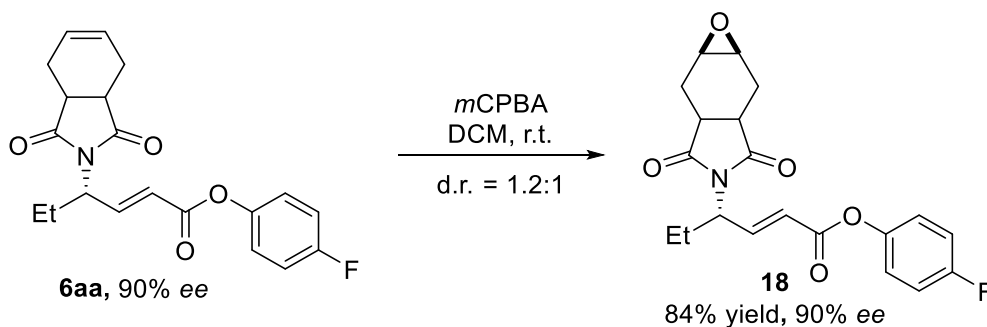

A dichloromethane solution of **6aa** (50 mg; 0.14 mmol) and *m*-chloroperbenzoic acid (48 mg; 0.28 mmol) was stirred at room temperature for 4h until the disappearance of **6aa** as indicated by TLC. Saturated sodium thiosulfate solution (5 mL) was added and the mixture was stirred for an additional 15 minutes. The organic layer was separated and the aqueous phase was extracted with dichloromethane (3x10 mL). Combined organic layers were washed with saturated sodium bicarbonate, followed by brine, and dried over anhydrous Na<sub>2</sub>SO<sub>4</sub>. The solvent was removed under reduced pressure and the resulting solid was purified by flash column chromatography in petroleum ether/EtOAc (3:1) to give **18** (84%, 90% *ee*) of white product.  $[\alpha]_D^{22} = 6.0$  (*c* 0.25, acetone); <sup>1</sup>H NMR (400 MHz, CDCl<sub>3</sub>) δ 7.25 (dd, *J* = 16.0, 6.4 Hz, 1H), 7.06 (d, *J* = 6.4 Hz, 4H), 6.04 (dd, *J* = 15.6, 0.8 Hz, 1H), 4.74 – 4.66 (m, 1H), 3.27 (s, 2H), 3.02 – 2.92 (m, 2H), 2.70 – 2.56 (m, 2H), 2.11 – 2.03 (m, 1H), 2.00 – 1.88 (m, 3H), 1.62 (d, *J* = 6.0 Hz, 1H), 0.89 (t, *J* = 7.6 Hz, 3H); <sup>13</sup>C NMR (100 MHz, CDCl<sub>3</sub>) δ 179.09, 164.08, 161.45, 159.02, 146.29 (d, *J* = 2.8 Hz), 145.87, 122.87 (d, *J* = 8.4 Hz), 122.41, 116.18, 115.94, 53.71, 49.00, 35.14, 23.85, 23.20, 10.69; Enantiomeric excess: 90%, determined by HPLC (Chiralpak AD-3, hexane/*i*-PrOH = 70/30; flow rate 0.8 ml/min; 25 °C; 254 nm), first peak: *t*<sub>R</sub> = 23.5 min, second peak: *t*<sub>R</sub> = 35.1 min. HRMS (ESI) calcd. For C<sub>20</sub>H<sub>20</sub>FNNaO<sub>5</sub> [M+Na]<sup>+</sup>: 396.1218, found: 396.1224.

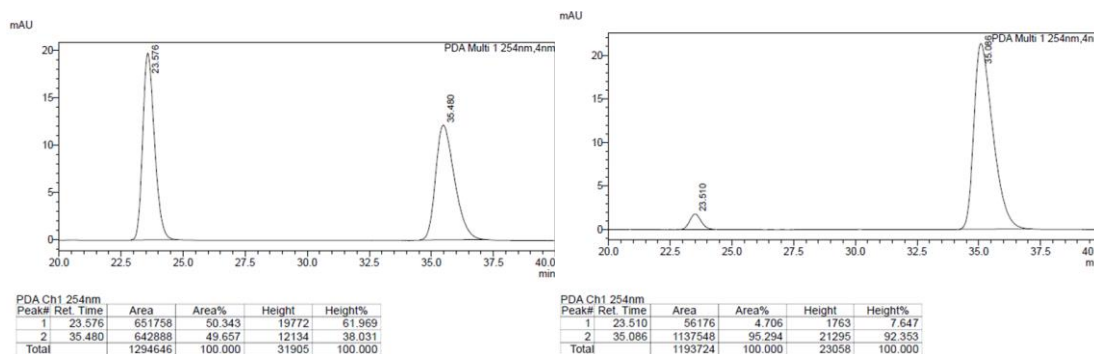



## 6.8 Synthesis of **19**:<sup>[9]</sup>

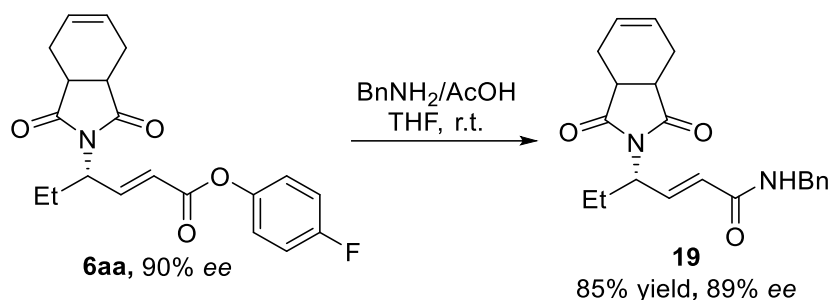

BnNH<sub>2</sub> (75 mg, 0.7 mmol) and AcOH (42 mg, 0.7 mmol) were added to a solution of **6aa** (50 mg, 0.14 mmol) in THF (1.0 mL). The reaction mixture was stirred at room temperature for 8 h until the disappearance of **6aa** as indicated by TLC, concentrated, and purified by flash chromatography (silica gel, petroleum ether /EtOAc = 2/1 as eluent) to give acid **19** (85%, 89% ee).  $[\alpha]^{22}_{\text{D}} = -0.8$  (*c* 0.25, acetone); <sup>1</sup>H NMR (400 MHz, CDCl<sub>3</sub>) δ 7.35 – 7.24 (m, 5H), 6.93 (dd, *J* = 15.6, 7.2 Hz, 1H), 6.09 (s, 1H), 5.93 – 5.88 (m, 2H), 5.86 (d, *J* = 15.6 Hz, 1H), 4.56 (dd, *J* = 16.0, 7.2 Hz, 1H), 4.46 (d, *J* = 5.6 Hz, 2H), 3.08 – 2.98 (m, 2H), 2.58 (d, *J* = 14.8 Hz, 2H), 2.19 (dd, *J* = 14.8, 6.8 Hz, 2H), 2.11 – 1.96 (m, 1H), 1.86 – 1.72 (m, 1H), 0.79 (t, *J* = 7.6 Hz, 3H); <sup>13</sup>C NMR (100 MHz, CDCl<sub>3</sub>) δ 179.67 (d, *J* = 1.6 Hz), 164.85, 139.62, 137.97, 128.63, 127.85, 127.48, 125.46, 54.36, 43.62, 38.83 (d, *J* = 16.3 Hz), 23.80, 23.53 (d, *J* = 2.3 Hz), 10.65; Enantiomeric excess: 89%, determined by HPLC (Chiralpak IC, hexane/*i*-PrOH = 70/30; flow rate 0.8 ml/min; 25 °C; 254 nm), first peak: t<sub>R</sub> = 20.7 min, second peak: t<sub>R</sub> = 27.0 min. HRMS (ESI) calcd. For C<sub>21</sub>H<sub>24</sub>N<sub>2</sub>NaO<sub>3</sub> [M+Na]<sup>+</sup>: 375.1679, found: 375.1677.

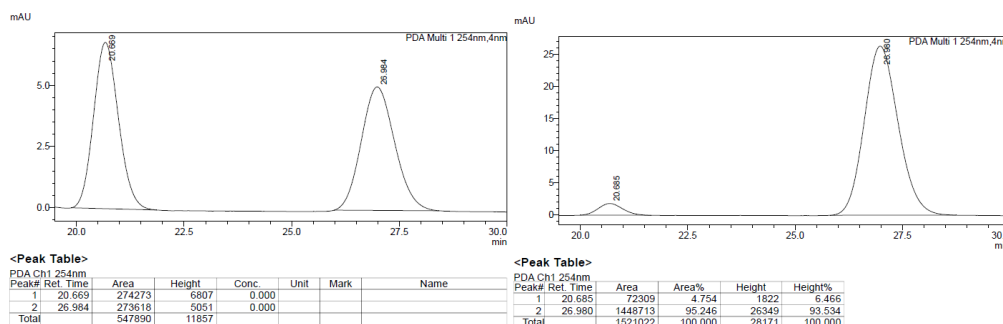

## 6.9 Reduction of the double bond of **6lo**:

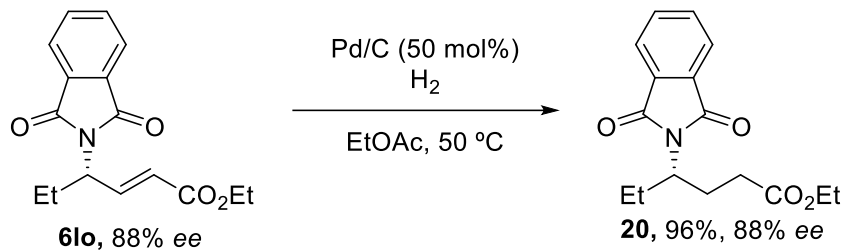

A suspension of **6lo** (143 mg, 0.50 mmol) and 50% palladium on carbon (70 mg) in EtOAc (10 mL) was maintained under an atmosphere of hydrogen gas for 8 h at 50 °C. The insoluble solids were removed by filtration and the filtrate was concentrated to provide product **20** (136.0 mg, 96%) without any purification.  $[\alpha]^{22}_D = -4.4$  (*c* 0.20, CHCl<sub>3</sub>); <sup>1</sup>H NMR (500 MHz, CDCl<sub>3</sub>) δ 7.86 – 7.77 (m, 2H), 7.87 – 7.77 (m, 2H), 7.74 – 7.68 (m, 2H), 7.74 – 7.69 (m, 2H), 4.13 (dq, *J* = 15.5, 5.0 Hz, 1H), 4.08 – 3.98 (m, 2H), 2.46 – 2.33 (m, 1H), 2.31 – 2.22 (m, 2H), 2.14 – 2.03 (m, 2H), 1.85 – 1.74 (m, 1H), 1.18 (t, *J* = 7.1 Hz, 3H), 0.86 (t, *J* = 7.4 Hz, 3H); <sup>13</sup>C NMR (126 MHz, CDCl<sub>3</sub>) δ 172.69, 168.62, 133.94, 131.73, 123.14, 60.44, 53.16, 31.50, 27.32, 25.44, 14.11, 11.02; Enantiomeric excess: 88%, determined by HPLC (Chiralpak AD-H, hexane/*i*-PrOH = 95/05; flow rate 0.8 ml/min; 25 °C; 210 nm), first peak: *t*<sub>R</sub> = 12.4 min, second peak: *t*<sub>R</sub> = 13.0 min. HRMS (ESI) calcd. For C<sub>16</sub>H<sub>19</sub>NNaO<sub>4</sub> [M+Na]<sup>+</sup>: 312.1206, found: 312.1210.

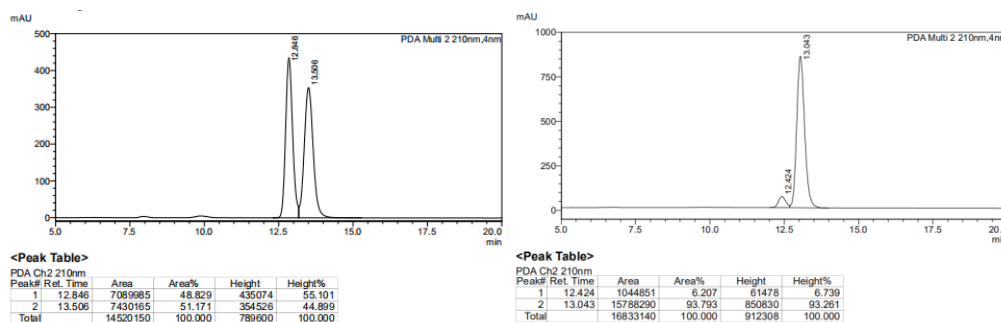

### 6.10 Acidic deprotection of 20:<sup>[10]</sup>

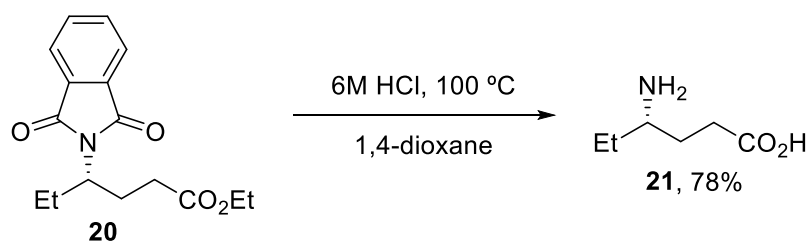

A solution of compound **20** (136 mg, 0.47 mmol) in dioxane (1 mL) and 6 M HCl (6 mL) is refluxed for 12 h. After cooling to room temperature, the mixture is washed with EtOAc. The aqueous phase is concentrated in vacuo to afford the product **21** (48.1 mg, 78%).  $[\alpha]_D^{22} = -3.7$  (*c* 0.10, acetone);  $^1\text{H}$  NMR (400 MHz,  $\text{D}_2\text{O}$ )  $\delta$  3.27 (p, *J* = 6.4 Hz, 1H), 2.53 (t, *J* = 7.6 Hz, 2H), 2.02 – 1.86 (m, 2H), 1.79 – 1.68 (m, 1H), 1.68 – 1.58 (m, 1H), 0.97 (t, *J* = 7.6 Hz, 3H);  $^{13}\text{C}$  NMR (101 MHz,  $\text{D}_2\text{O}$ )  $\delta$  177.07, 52.46, 29.63, 26.56, 24.71, 8.51. HRMS (ESI) calcd. For  $\text{C}_6\text{H}_{14}\text{NO}_2$   $[\text{M}+\text{H}]^+$ : 132.1019, found: 132.1015.

### 6.8 Synthesis of **22**:<sup>[11]</sup>

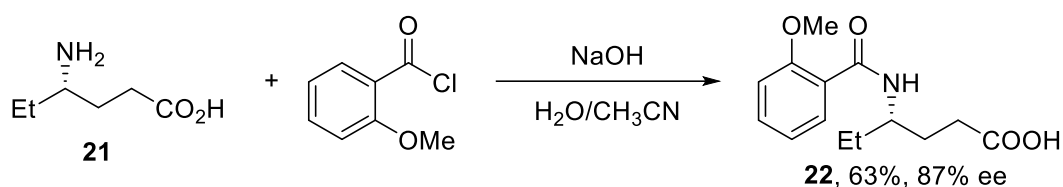

To a vigorously stirred solution containing amino acid **21** (26 mg, 0.2 mmol) and NaOH (0.8 mmol) in 2 mL  $\text{H}_2\text{O}/\text{CH}_3\text{CN}$  (3:1) at 0 °C was added *o*-methoxybenzoyl chloride (0.24 mmol). The reaction was allowed to warm to room temperature and then proceeded for 4 h, then cooled to 0 °C and acidified to pH = 1-2 with 2 N HCl, and was extracted into EtOAc (3×10 mL), dried over  $\text{Na}_2\text{SO}_4$ , filtered, concentrated, and purified by flash chromatography (silica gel, DCM/MeOH = 20/1 as eluent) to give **22** (32.9 mg, 63%).  $[\alpha]_D^{22} = -5.0$  (*c* 0.20, acetone);  $^1\text{H}$  NMR (400 MHz,  $\text{CDCl}_3$ )  $\delta$  8.26 – 8.08 (m, 1H), 7.75 (d, *J* = 8.4 Hz, 1H), 7.47 – 7.41 (m, 1H), 7.10 – 7.04 (m, 1H), 6.97 (d, *J* = 8.4 Hz, 1H), 4.18 – 4.05 (m, 1H), 3.96 (s, 3H), 2.43 (t, *J* = 7.6 Hz, 2H), 2.02 – 1.92 (m, 1H), 1.81 – 1.71 (m, 1H), 1.71 – 1.61 (m, 1H), 1.59 – 1.47 (m, 1H), 0.97 (t, *J* = 7.6 Hz, 3H);  $^{13}\text{C}$  NMR (101 MHz,  $\text{CDCl}_3$ )  $\delta$  (101 MHz,  $\text{CDCl}_3$ )  $\delta$  177.39, 165.94, 157.51, 132.96, 132.37, 121.42, 121.22, 111.39, 56.03, 56.00, 50.56, 31.49, 30.57, 28.27, 10.20; Enantiomeric excess: 87%, determined by HPLC (Chiralpak AD-H, hexane/*i*-PrOH = 85/15; flow rate 0.8 ml/min; 25 °C; 254 nm), first peak:  $t_R$  = 23.5 min, second peak:  $t_R$  = 28.6 min. HRMS (ESI) calcd. For  $\text{C}_{14}\text{H}_{19}\text{NNaO}_4$   $[\text{M}+\text{Na}]^+$ : 288.1206, found: 288.1221.

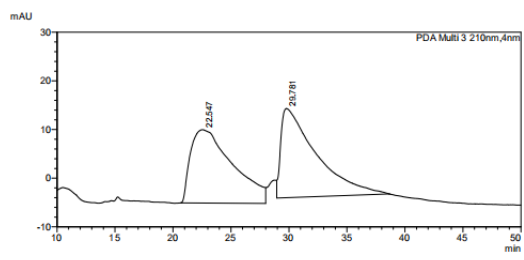

<Peak Table>

| Peak# | Ret. Time | Area    | Area%   | Height | Height% |
|-------|-----------|---------|---------|--------|---------|
| 1     | 22.547    | 3809193 | 49.478  | 15069  | 45.149  |
| 2     | 29.781    | 3889502 | 50.522  | 18308  | 54.851  |
| Total |           | 7698694 | 100.000 | 33377  | 100.000 |

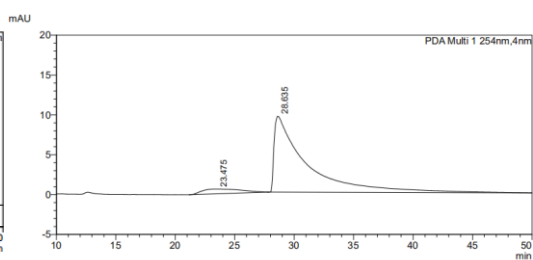

<Peak Table>

| Peak# | Ret. Time | Area    | Area%   | Height | Height% |
|-------|-----------|---------|---------|--------|---------|
| 1     | 23.475    | 132844  | 6.859   | 594    | 5.879   |
| 2     | 28.635    | 1803896 | 93.141  | 9516   | 94.121  |
| Total |           | 1936740 | 100.000 | 10110  | 100.000 |

**6. The X-ray structure of compound (*R<sub>P</sub>*, *S*, *S*, *R<sub>S</sub>*)-L2 borane complex, (*S<sub>P</sub>*, *R*, *S*, *R<sub>S</sub>*)-L2 borane complex , 6ba and 13:**

**7.1 The X-ray structure of compound (*R<sub>P</sub>*, *S*, *S*, *R<sub>S</sub>*)-L2 borane complex**

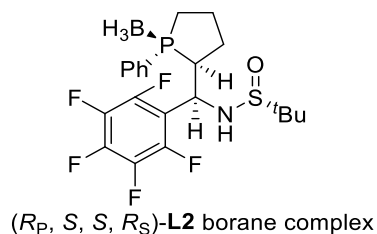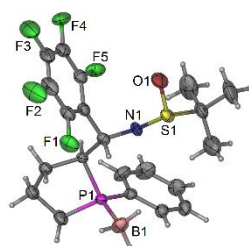

|                        |                                                    |                                   |
|------------------------|----------------------------------------------------|-----------------------------------|
| Bond precision:        | C-C = 0.0045 Å                                     | Wavelength=0.71073                |
| Cell:                  | a=6.5464 (2)      b=17.3658 (6)      c=21.0198 (7) |                                   |
|                        | alpha=90      beta=96.370 (1)      gamma=90        |                                   |
| Temperature: 173 K     |                                                    |                                   |
|                        | Calculated                                         | Reported                          |
| Volume                 | 2374.85 (14)                                       | 2374.85 (14)                      |
| Space group            | P 21                                               | P2 (1)                            |
| Hall group             | P 2yb                                              | ?                                 |
| Moiety formula         | C21 H25 B F5 N O P S                               | ?                                 |
| Sum formula            | C21 H25 B F5 N O P S                               | C21 H25 B F5 N O P S              |
| Mr                     | 476.26                                             | 476.26                            |
| Dx, g cm <sup>-3</sup> | 1.332                                              | 1.332                             |
| Z                      | 4                                                  | 4                                 |
| Mu (mm <sup>-1</sup> ) | 0.255                                              | 0.255                             |
| F000                   | 988.0                                              | 988.0                             |
| F000'                  | 989.48                                             |                                   |
| h, k, lmax             | 7, 20, 25                                          | 7, 20, 25                         |
| Nref                   | 8359 [ 4330 ]                                      | 8322                              |
| Tmin, Tmax             | 0.912, 0.931                                       | 0.914, 0.932                      |
| Tmin'                  | 0.912                                              |                                   |
| Correction method=     | # Reported T Limits: Tmin=0.914 Tmax=0.932         |                                   |
| AbsCorr =              | MULTI-SCAN                                         |                                   |
| Data completeness=     | 1.92/1.00                                          | Theta(max)= 25.010                |
| R(reflections)=        | 0.0373 ( 7464 )                                    | wR2(reflections)= 0.0912 ( 8322 ) |
| S =                    | 1.036                                              | Npar= 583                         |

## 7.2 The X-ray structure of compound (*S<sub>P</sub>*, *R*, *S*, *R<sub>S</sub>*)-L2 borane complex.

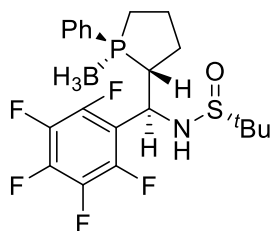

(*S<sub>P</sub>*, *R*, *S*, *R<sub>S</sub>*)-L2 borane complex

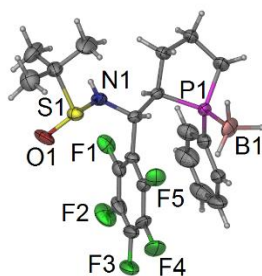

|                        |                                            |                                  |
|------------------------|--------------------------------------------|----------------------------------|
| Bond precision:        | C-C = 0.0110 Å                             | Wavelength=0.71073               |
| Cell:                  | a=17.1138 (14) b=6.6266 (5) c=20.6037 (16) |                                  |
|                        | alpha=90 beta=93.452 (3) gamma=90          |                                  |
| Temperature:           | 173 K                                      |                                  |
|                        | Calculated                                 | Reported                         |
| Volume                 | 2332.4 (3)                                 | 2332.3 (3)                       |
| Space group            | P 21                                       | P2 (1)                           |
| Hall group             | P 2yb                                      | ?                                |
| Moiety formula         | C21 H26 B F5 N O P S                       | ?                                |
| Sum formula            | C21 H26 B F5 N O P S                       | C21 H26 B F5 N O P S             |
| Mr                     | 477.27                                     | 477.27                           |
| Dx, g cm <sup>-3</sup> | 1.359                                      | 1.359                            |
| Z                      | 4                                          | 4                                |
| Mu (mm <sup>-1</sup> ) | 0.260                                      | 0.260                            |
| F000                   | 992.0                                      | 992.0                            |
| F000'                  | 993.48                                     |                                  |
| h,k,lmax               | 20,7,24                                    | 20,7,24                          |
| Nref                   | 8196 [ 4489]                               | 7869                             |
| Tmin,Tmax              | 0.942,0.964                                | 0.928,0.965                      |
| Tmin'                  | 0.927                                      |                                  |
| Correction method=     | # Reported T Limits: Tmin=0.928 Tmax=0.965 |                                  |
| AbsCorr =              | MULTI-SCAN                                 |                                  |
| Data completeness=     | 1.75/0.96                                  | Theta(max)= 25.000               |
| R(reflections)=        | 0.0714 ( 6051)                             | wR2(reflections)= 0.1800 ( 7869) |
| S =                    | 1.081                                      | Npar= 583                        |

### 7.3 The X-ray structure of compound 6ba.

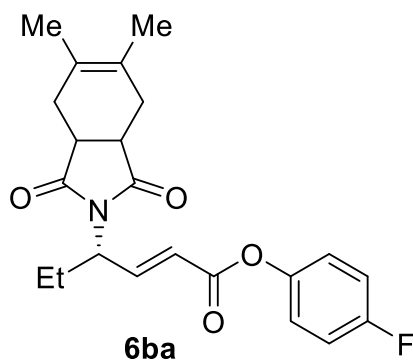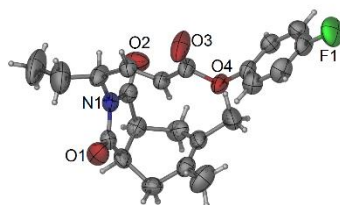

|                                                                                    |                                 |                |                    |
|------------------------------------------------------------------------------------|---------------------------------|----------------|--------------------|
| Bond precision:                                                                    | C-C = 0.0080 Å                  |                | Wavelength=1.54184 |
| Cell:                                                                              | a=11.4515(2)                    | b=13.8216(2)   | c=13.0859(2)       |
|                                                                                    | alpha=90                        | beta=95.239(2) | gamma=90           |
| Temperature: 293 K                                                                 |                                 |                |                    |
|                                                                                    | Calculated                      | Reported       |                    |
| Volume                                                                             | 2062.56(6)                      | 2062.56(6)     |                    |
| Space group                                                                        | P 21/c                          | P 1 21/c 1     |                    |
| Hall group                                                                         | -P 2ybc                         | -P 2ybc        |                    |
| Moiety formula                                                                     | C22 H24 F N O4                  | C22 H24 F N O4 |                    |
| Sum formula                                                                        | C22 H24 F N O4                  | C22 H24 F N O4 |                    |
| Mr                                                                                 | 385.42                          | 385.42         |                    |
| Dx, g cm-3                                                                         | 1.241                           | 1.241          |                    |
| Z                                                                                  | 4                               | 4              |                    |
| Mu (mm-1)                                                                          | 0.753                           | 0.753          |                    |
| F000                                                                               | 816.0                           | 816.0          |                    |
| F000'                                                                              | 818.69                          |                |                    |
| h, k, lmax                                                                         | 13, 16, 15                      | 13, 16, 15     |                    |
| Nref                                                                               | 3690                            | 3604           |                    |
| Tmin, Tmax                                                                         | 0.756, 0.854                    | 0.731, 1.000   |                    |
| Tmin'                                                                              | 0.713                           |                |                    |
| Correction method= # Reported T Limits: Tmin=0.731 Tmax=1.000 AbsCorr = MULTI-SCAN |                                 |                |                    |
| Data completeness= 0.977                                                           | Theta(max)= 67.043              |                |                    |
| R(reflections)= 0.1146( 3315)                                                      | wR2(reflections)= 0.3195( 3604) |                |                    |
| S = 1.079                                                                          | Npar= 257                       |                |                    |

## 7.4 The X-ray structure of compound 13.

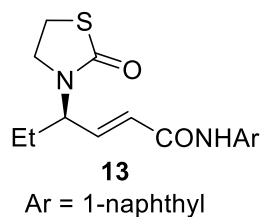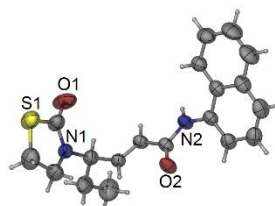

|                                                                                    |                                 |                    |              |
|------------------------------------------------------------------------------------|---------------------------------|--------------------|--------------|
| Bond precision:                                                                    | C-C = 0.0097 Å                  | Wavelength=1.54184 |              |
| Cell:                                                                              | a=7.2656(3)                     | b=9.5413(3)        | c=13.0878(4) |
|                                                                                    | alpha=90                        | beta=100.119(3)    | gamma=90     |
| Temperature: 293 K                                                                 |                                 |                    |              |
|                                                                                    | Calculated                      | Reported           |              |
| Volume                                                                             | 893.18(5)                       | 893.18(5)          |              |
| Space group                                                                        | P 21                            | P 1 21 1           |              |
| Hall group                                                                         | P 2yb                           | P 2yb              |              |
| Moiety formula                                                                     | C19 H20 N2 O2 S                 | C19 H20 N2 O2 S    |              |
| Sum formula                                                                        | C19 H20 N2 O2 S                 | C19 H20 N2 O2 S    |              |
| Mr                                                                                 | 340.43                          | 340.43             |              |
| Dx, g cm <sup>-3</sup>                                                             | 1.266                           | 1.266              |              |
| Z                                                                                  | 2                               | 2                  |              |
| Mu (mm <sup>-1</sup> )                                                             | 1.712                           | 1.712              |              |
| F000                                                                               | 360.0                           | 360.0              |              |
| F000'                                                                              | 361.62                          |                    |              |
| h, k, lmax                                                                         | 8, 11, 15                       | 8, 11, 15          |              |
| Nref                                                                               | 3193[ 1701]                     | 3162               |              |
| Tmin, Tmax                                                                         | 0.544, 0.641                    | 0.553, 1.000       |              |
| Tmin'                                                                              | 0.464                           |                    |              |
| Correction method= # Reported T Limits: Tmin=0.553 Tmax=1.000 AbsCorr = MULTI-SCAN |                                 |                    |              |
| Data completeness= 1.86/0.99                                                       | Theta(max)= 67.074              |                    |              |
| R(reflections)= 0.0766( 2544)                                                      | wR2(reflections)= 0.2144( 3162) |                    |              |
| S = 1.040                                                                          | Npar= 218                       |                    |              |



## 7. References:

- [1]. a) W. Tang, X. Zhang, *Angew. Chem. Int. Ed.* **2002**, *41*, 1612; b) X.-M. Sun, K. Manabe, W. W.-L. Lam, N. Shiraishi, J. Kobayashi, S. Kobayashi, *Chem. Eur. J.* **2005**, *11*, 361; c) A. Haynes, G. L. Williams, *Organometallics* **2007**, *26*, 713.
- [2] I. Franzoni, L. Guéhené, C. Mazet, *Tetrahedron* **2014**, *70*, 4181.
- [3] Y. He, R. J. Hinklin, J. Chang, L. L. Kiessling, *Org. Lett.* **2004**, *6*, 4479.
- [4] T. Wang, Z. Yu, D. L. Hoon, C. Phee, Y. Lan, Y. Lu, *J. Am. Chem. Soc.* **2016**, *138*, 265.
- [5] a) S. W. Smith, G. C. Fu, *J. Am. Chem. Soc.* **2009**, *131*, 14231; b) R. Sinisi, J. Sun, G. C. Fu, *Proc. Natl. Acad. Sci. U. S. A.* **2010**, *107*, 20652; c) R. J. Lundgren, A. Wilsily, N. Marion, C. Ma, Y. K. Chung, G. C. Fu, *Angew. Chem. Int. Ed.* **2013**, *52*, 2525; d) M. Kalek, G. C. Fu, *J. Am. Chem. Soc.* **2015**, *137*, 9438.
- [6] S. L. Wiskur, G. C. Fu, *J. Am. Chem. Soc.* **2005**, *127*, 6176.
- [7] Z. Liu, H.-Q. Ni, T. Zeng, K. M. Engle, *J. Am. Chem. Soc.* **2018**, *140*, 3223.
- [8] K. N. Houk, Y. Lin, F. K. Brown, *J. Am. Chem. Soc.* **1986**, *108*, 554.
- [9] J. Li, W. Chang, W. Ren, J. Dai, Y. Shi, *Org. Lett.* **2016**, *18*, 5456.
- [10] M. Nasopoulou, D. Georgiadis, M. Matziari, V. Dive, A. Yiotakis, *J. Org. Chem.* **2007**, *72*, 7222.
- [11] B. M. Trost, C. Lee, *J. Am. Chem. Soc.* **2001**, *123*, 12191.

## 8. NMR spectra:

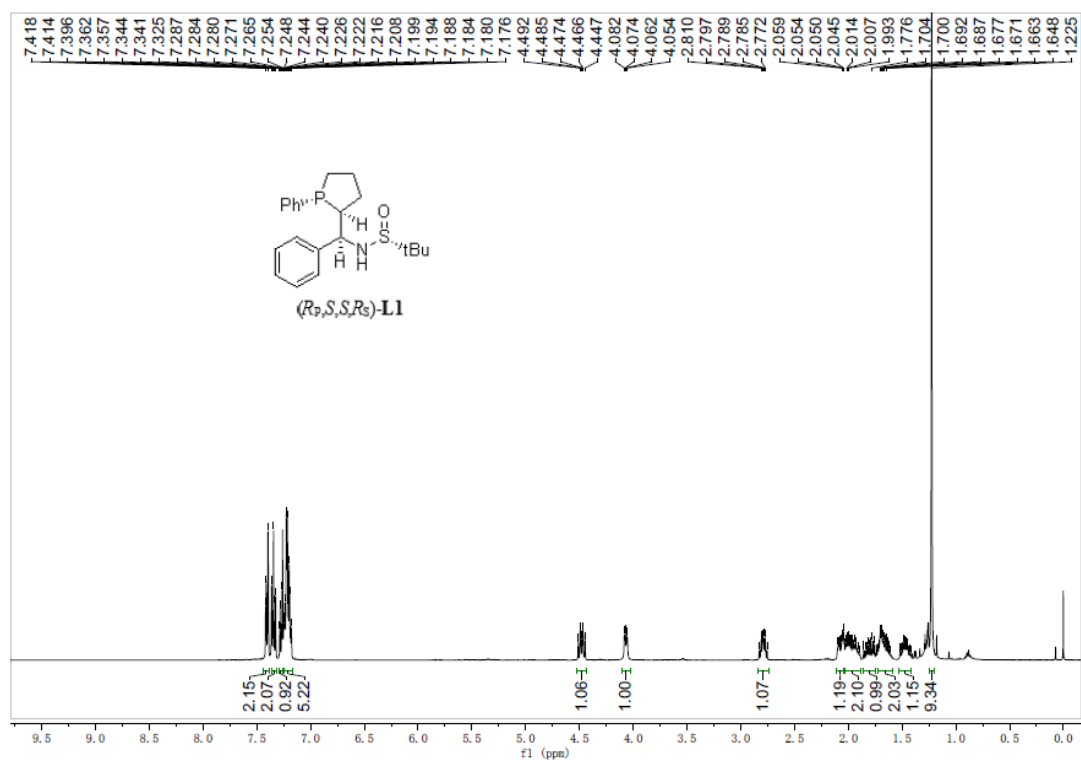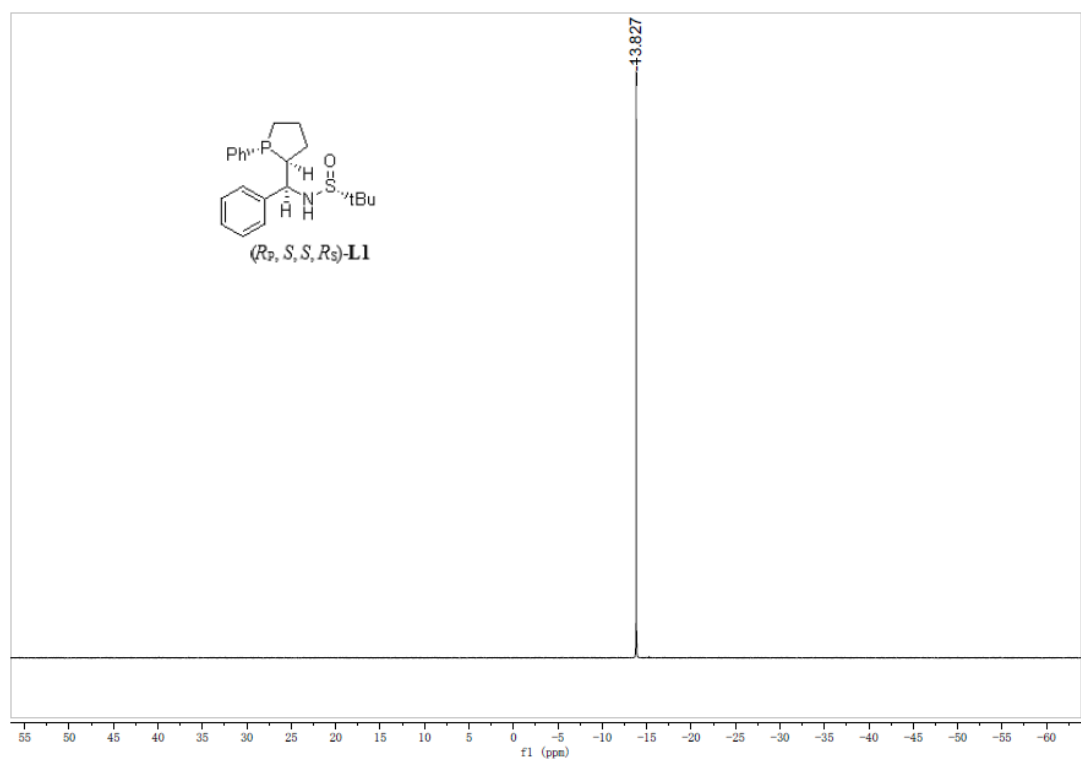

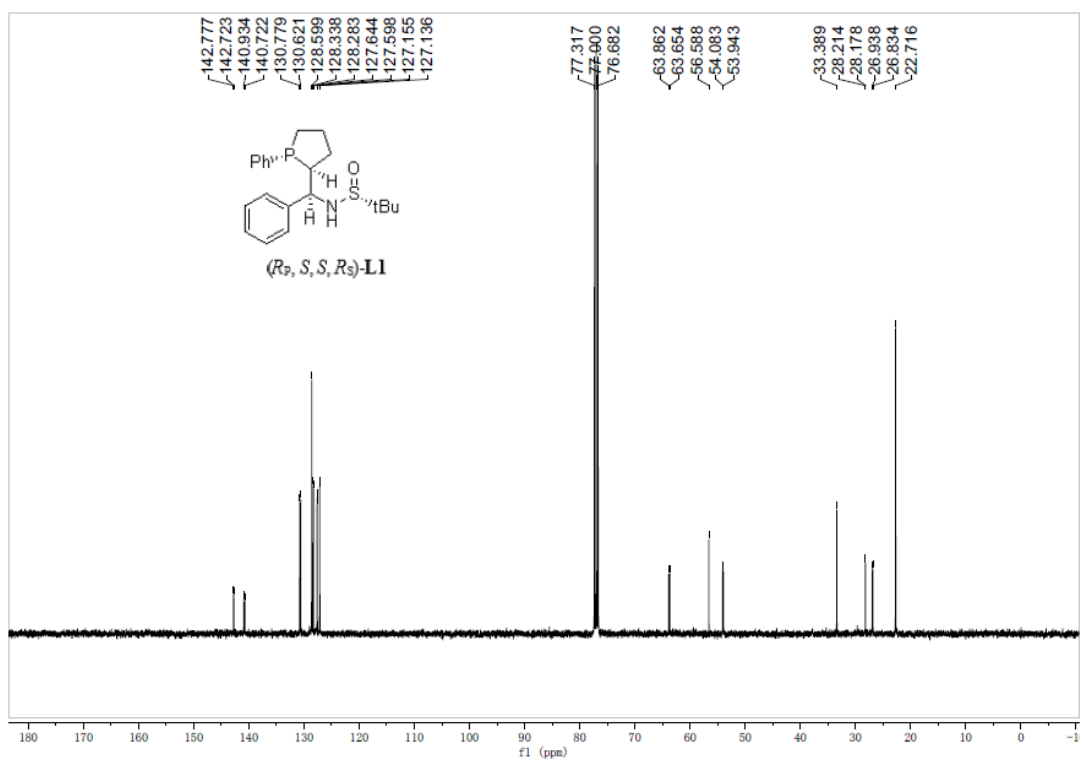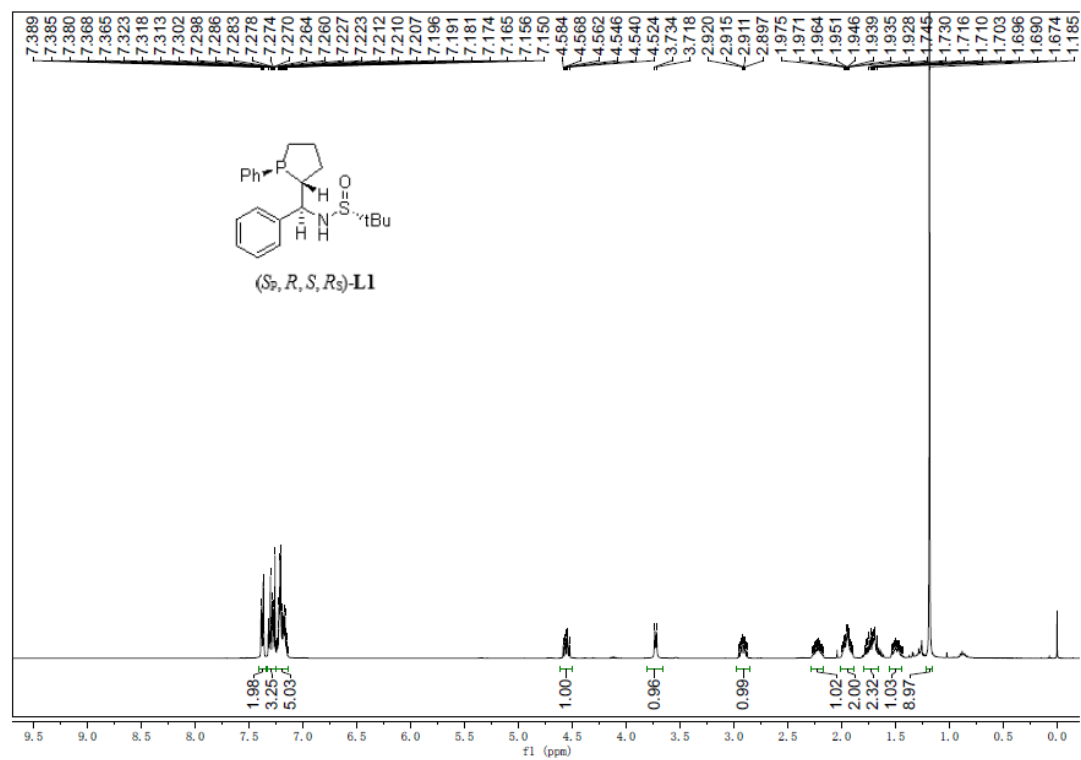

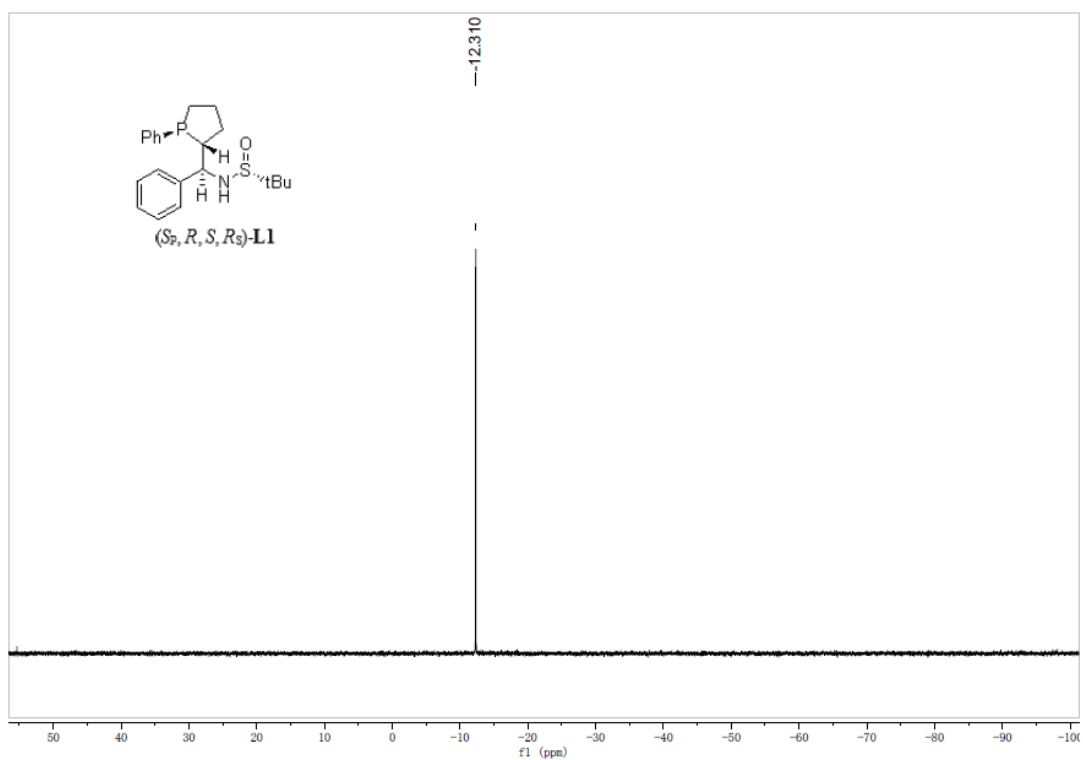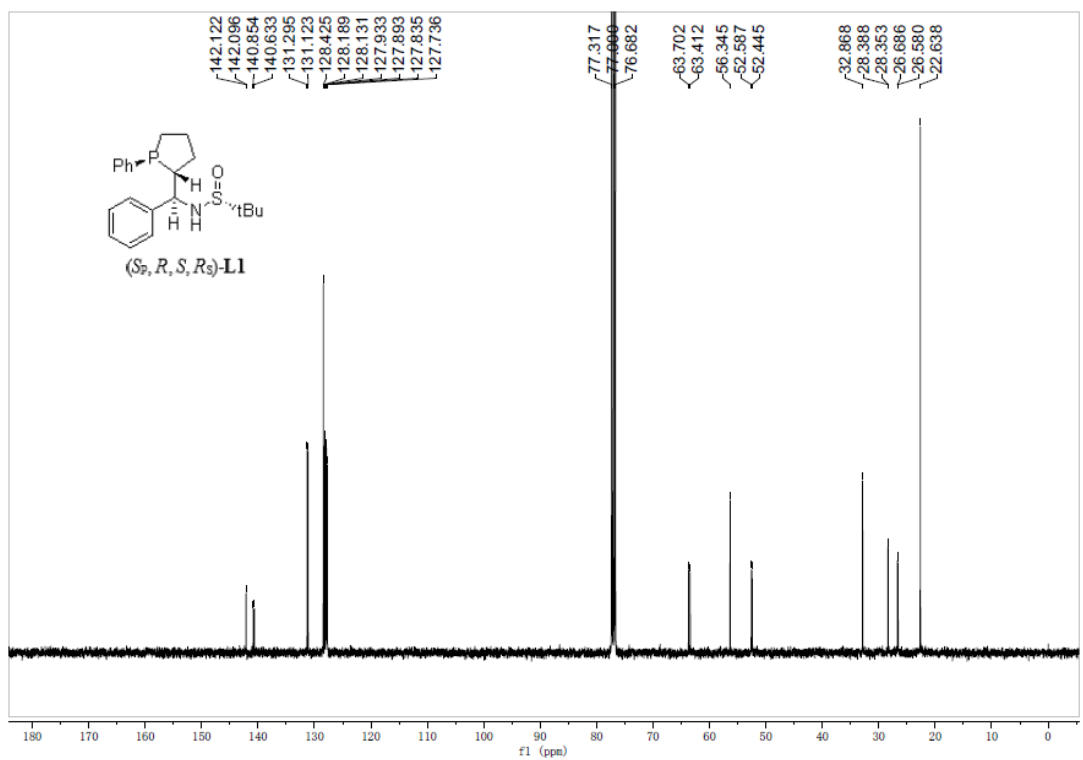

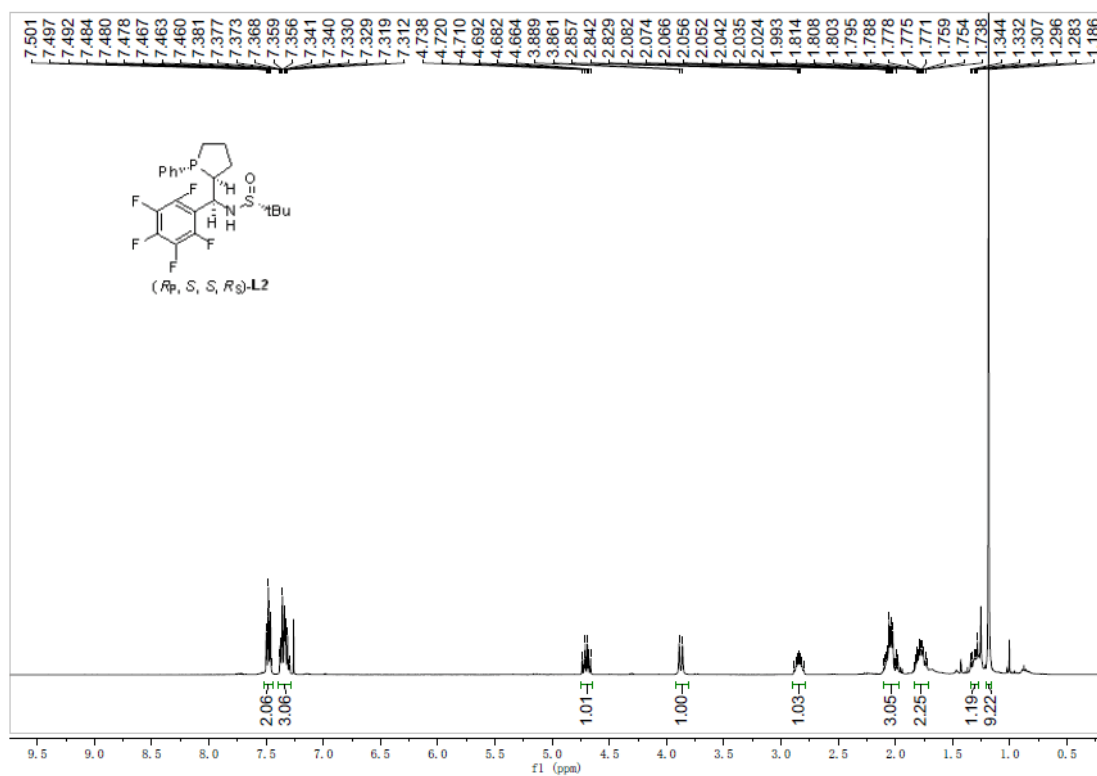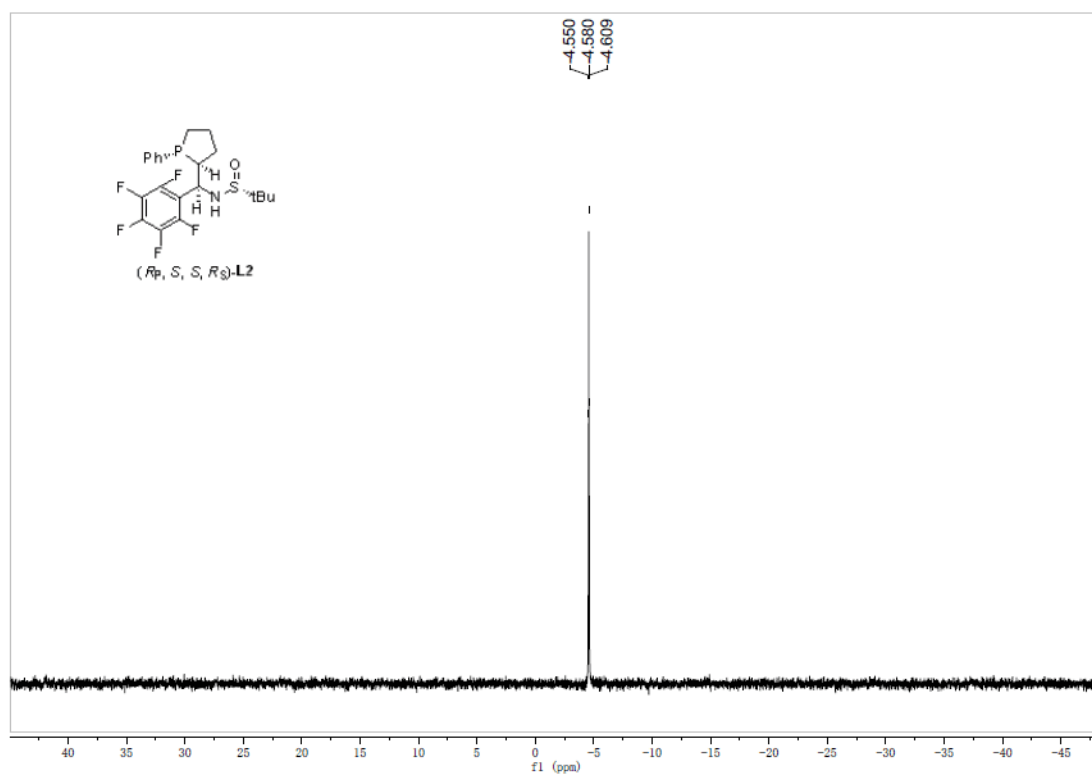

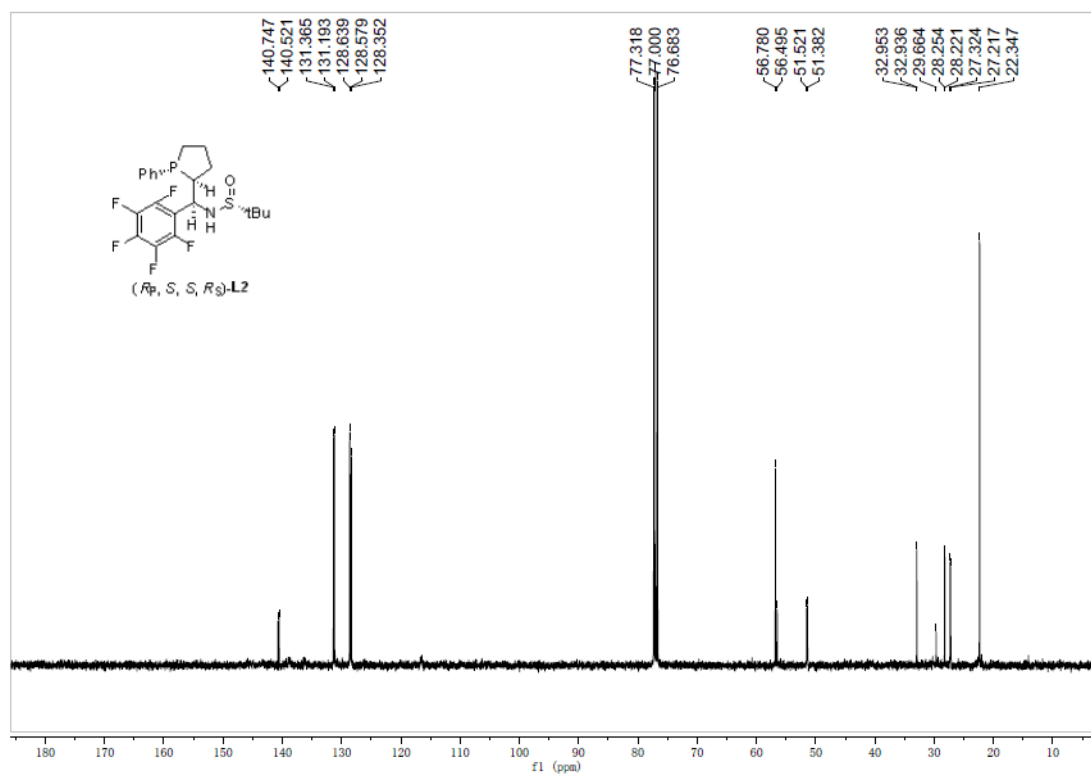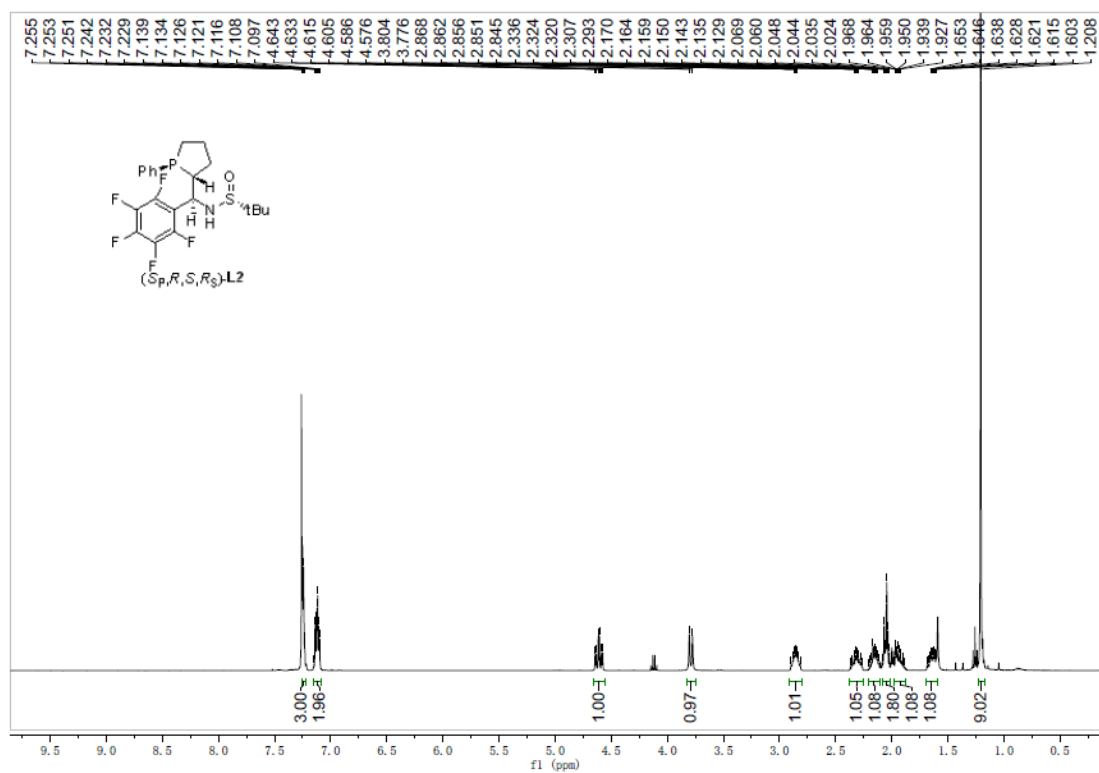

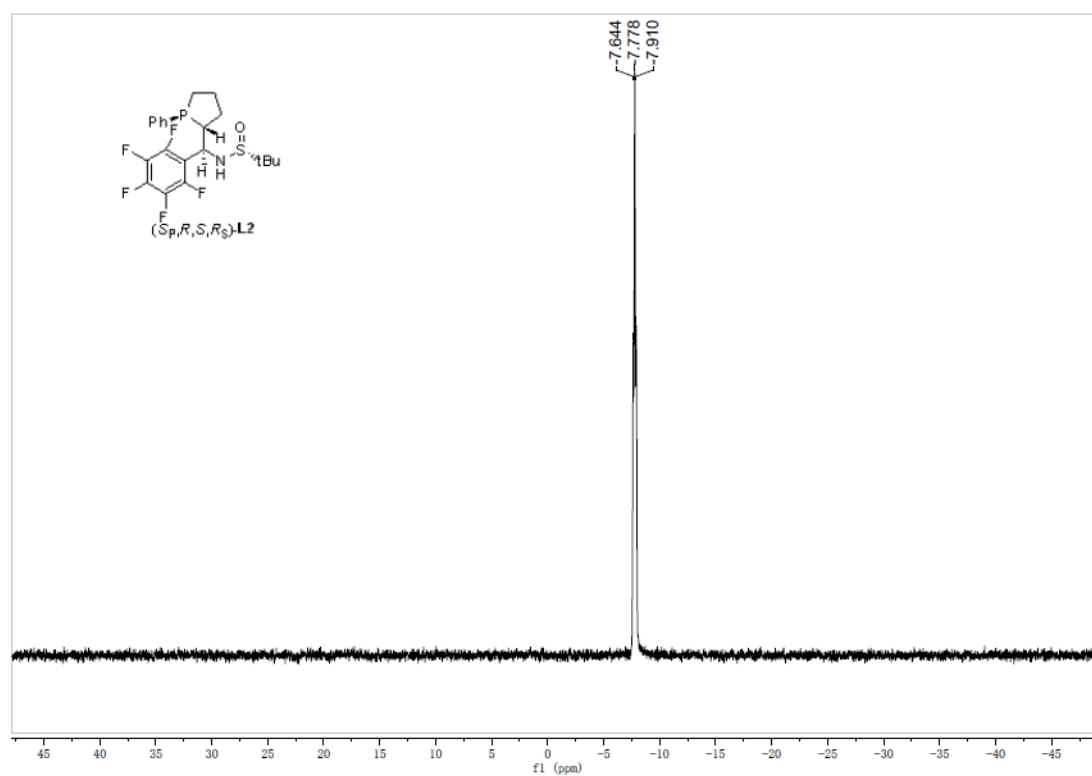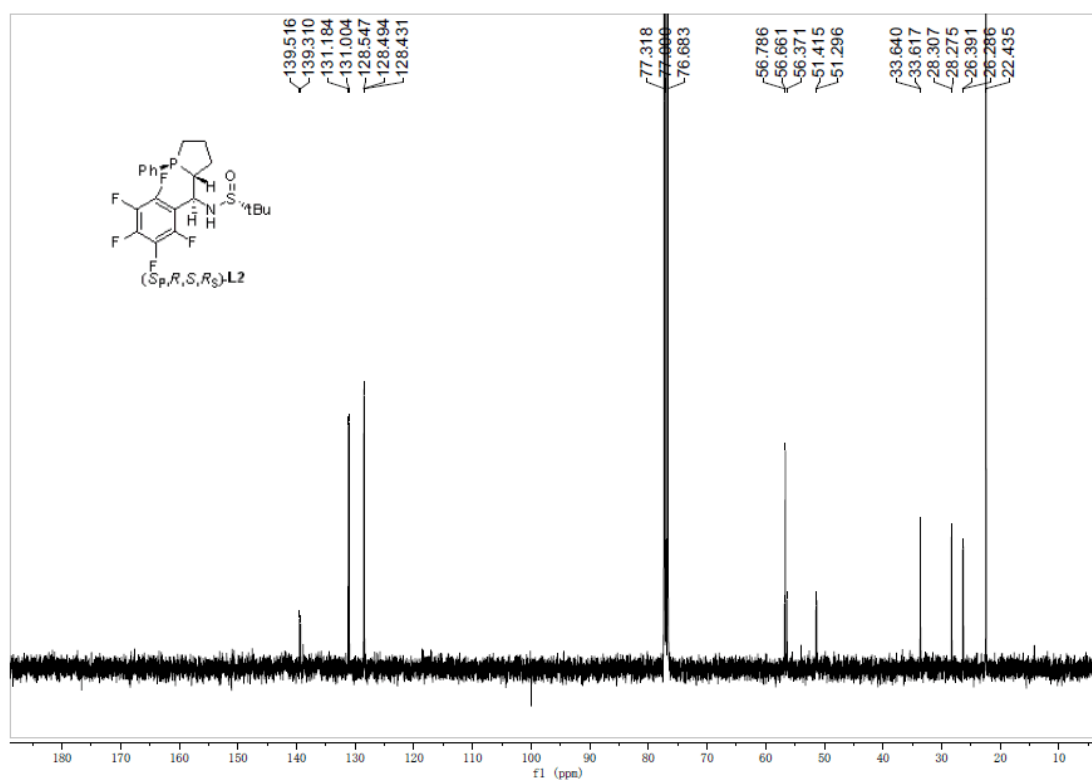

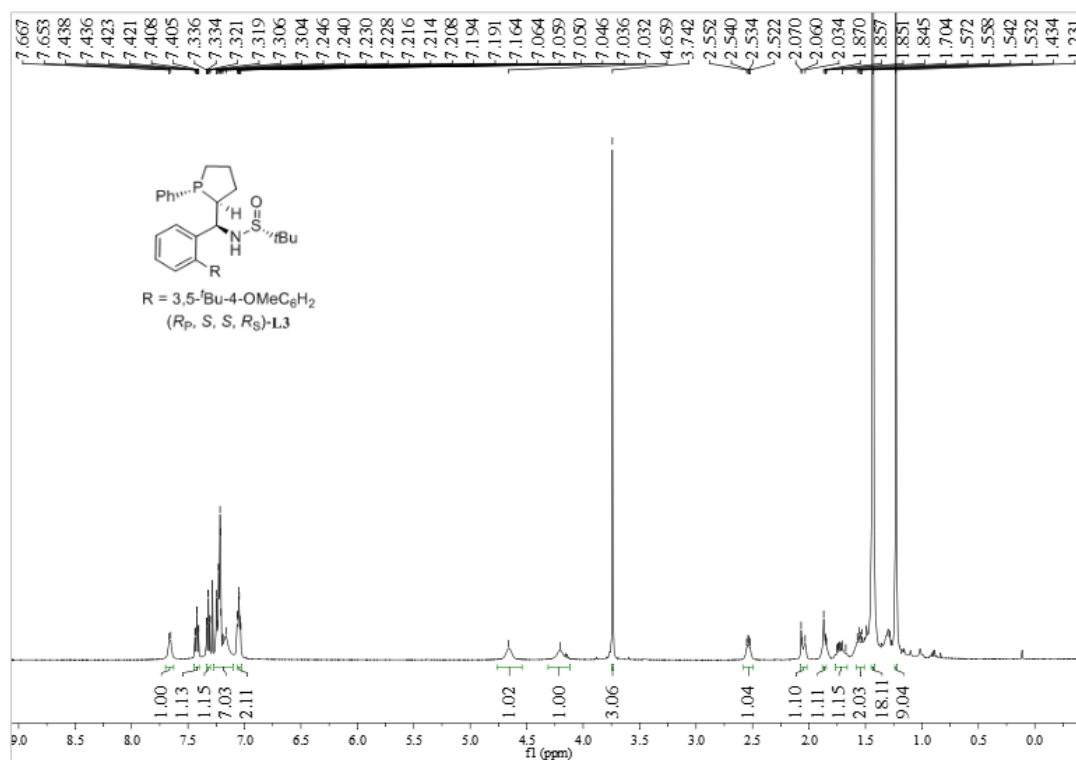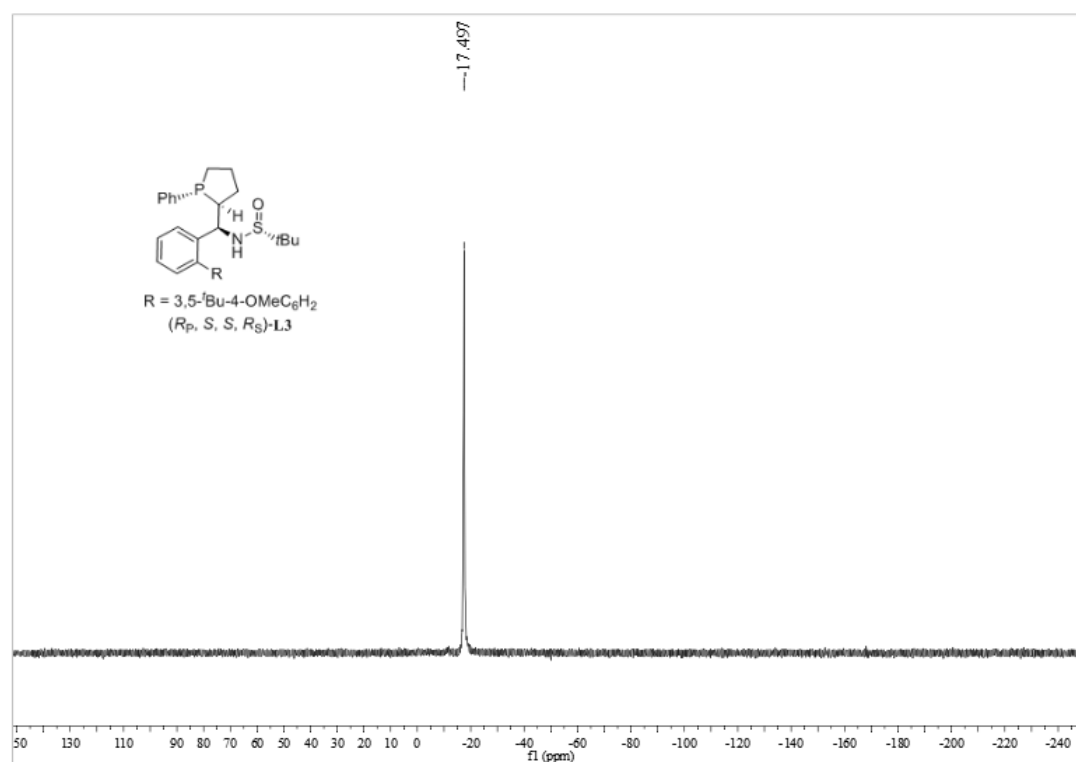



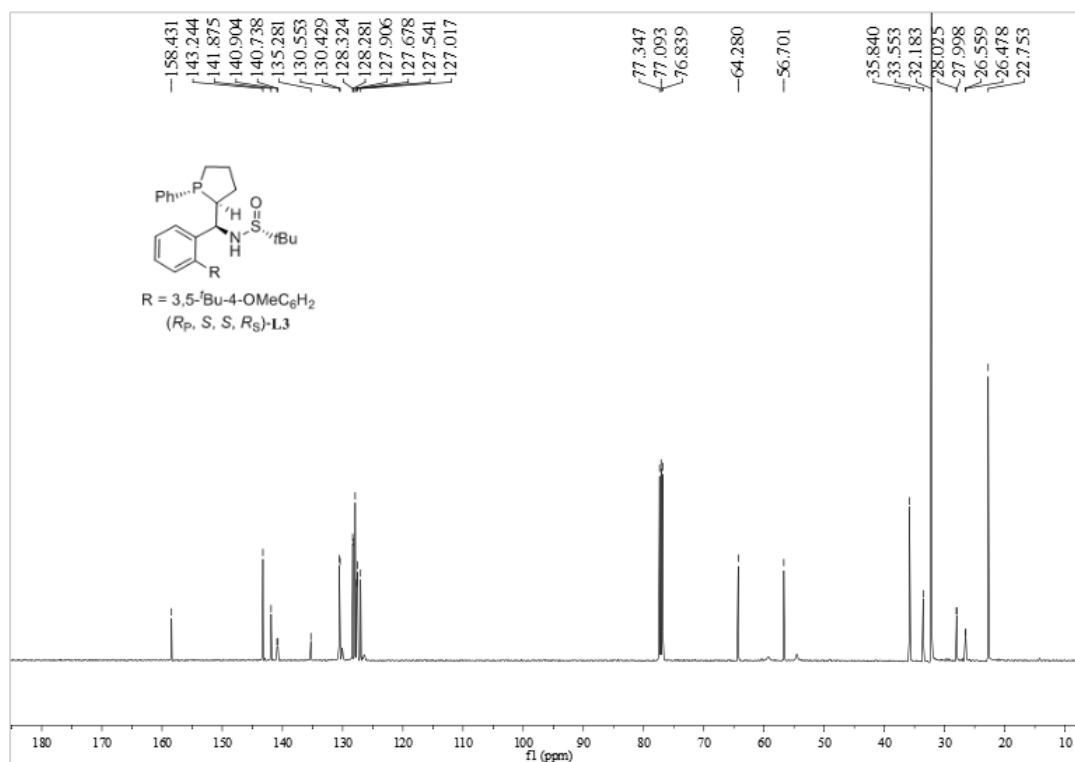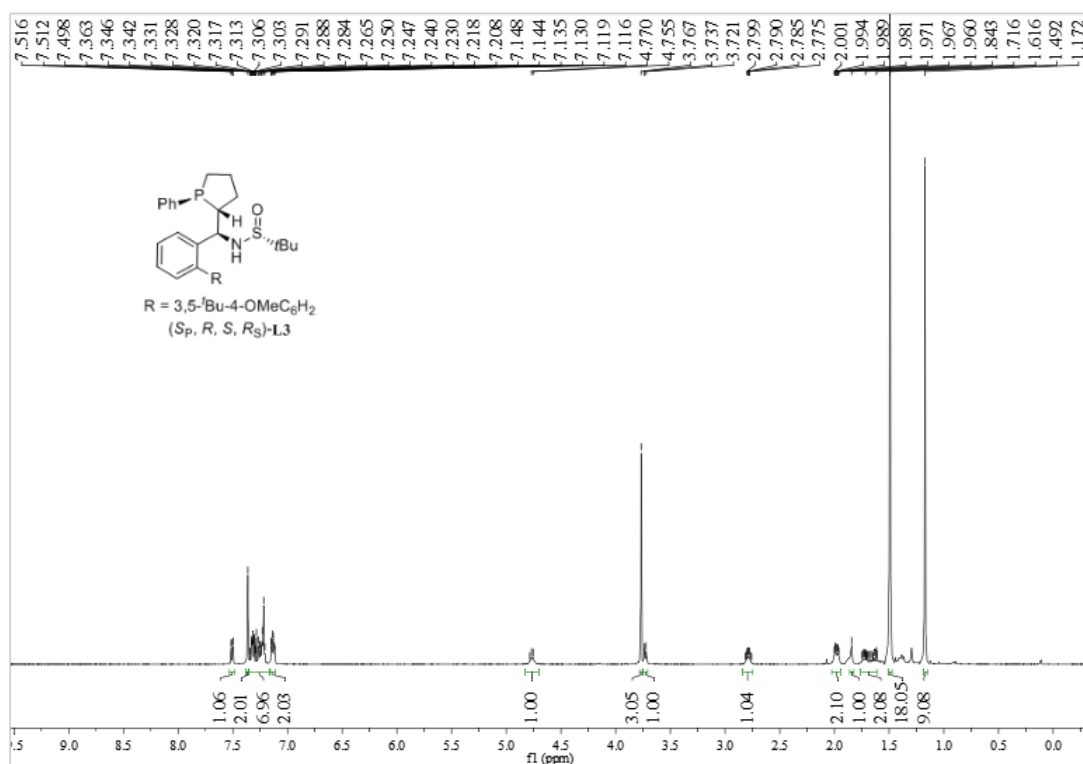

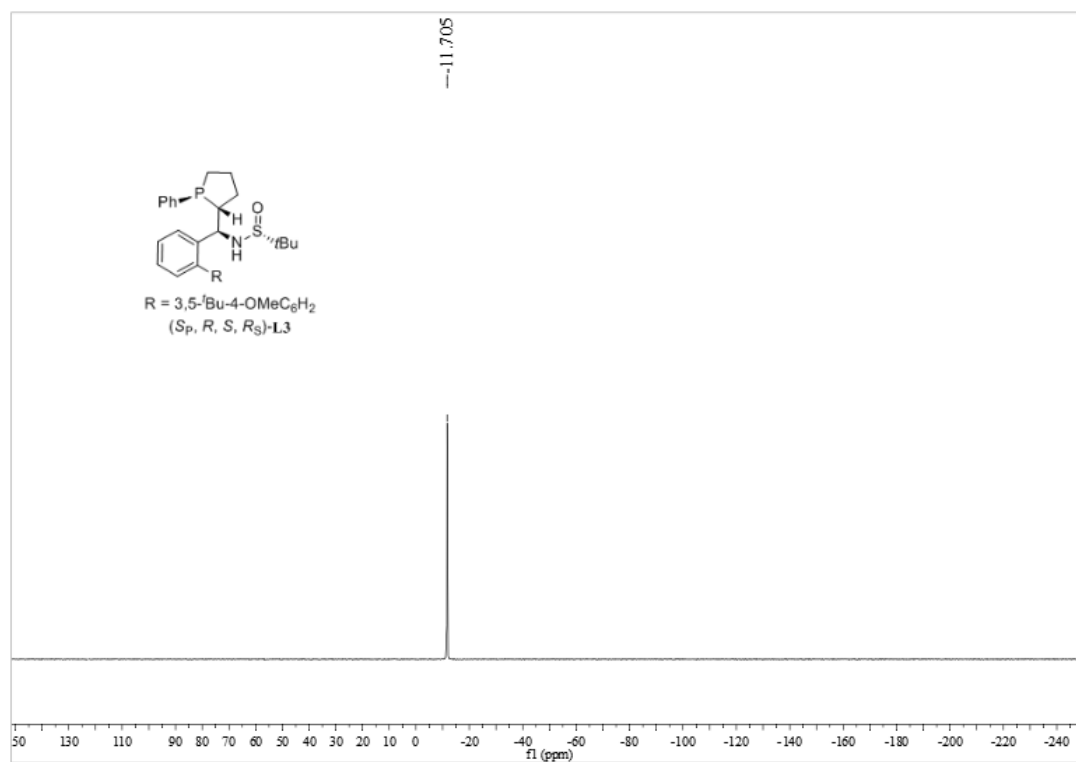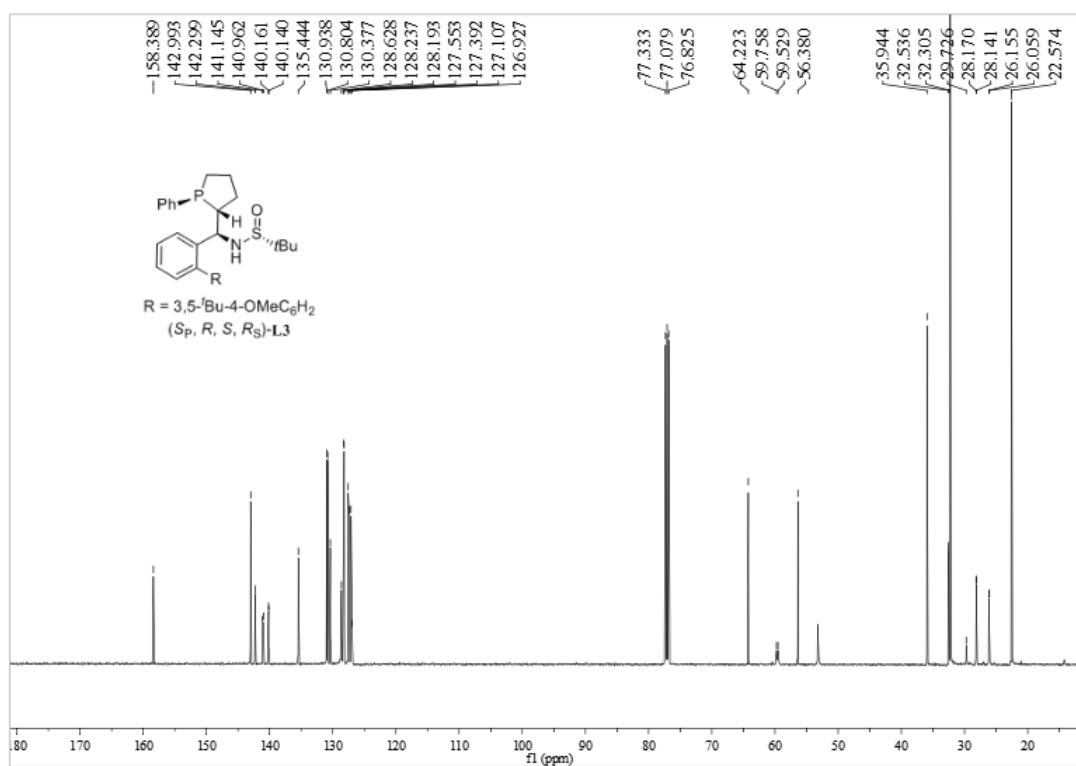

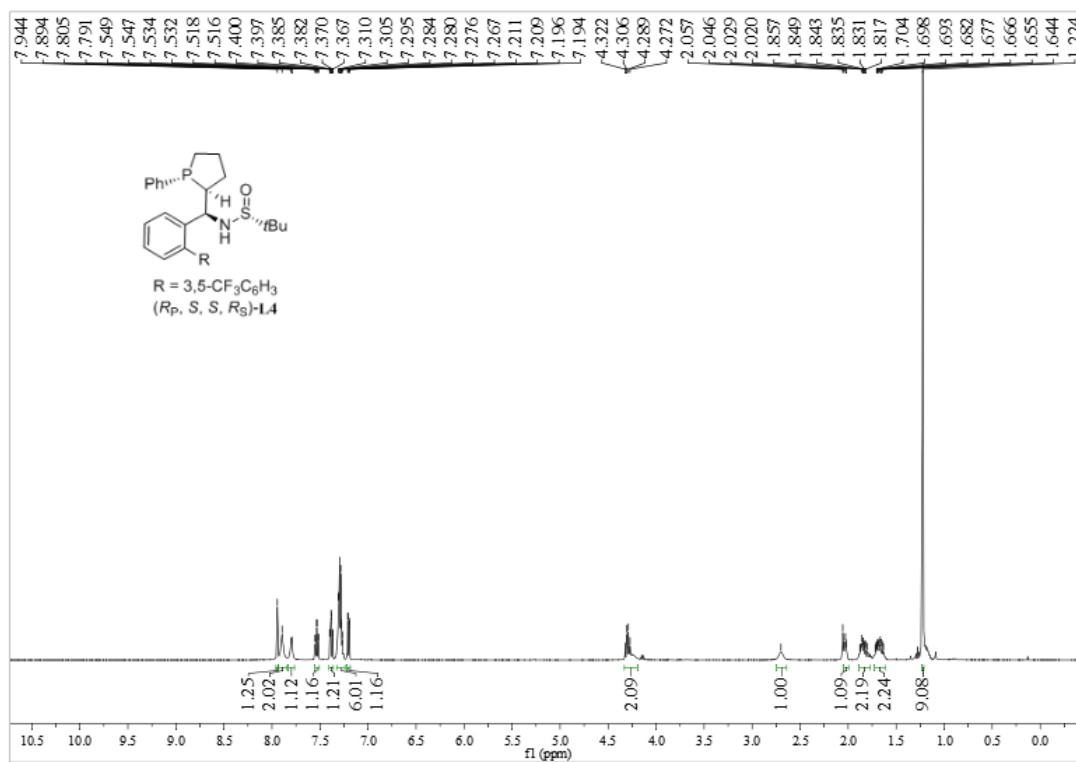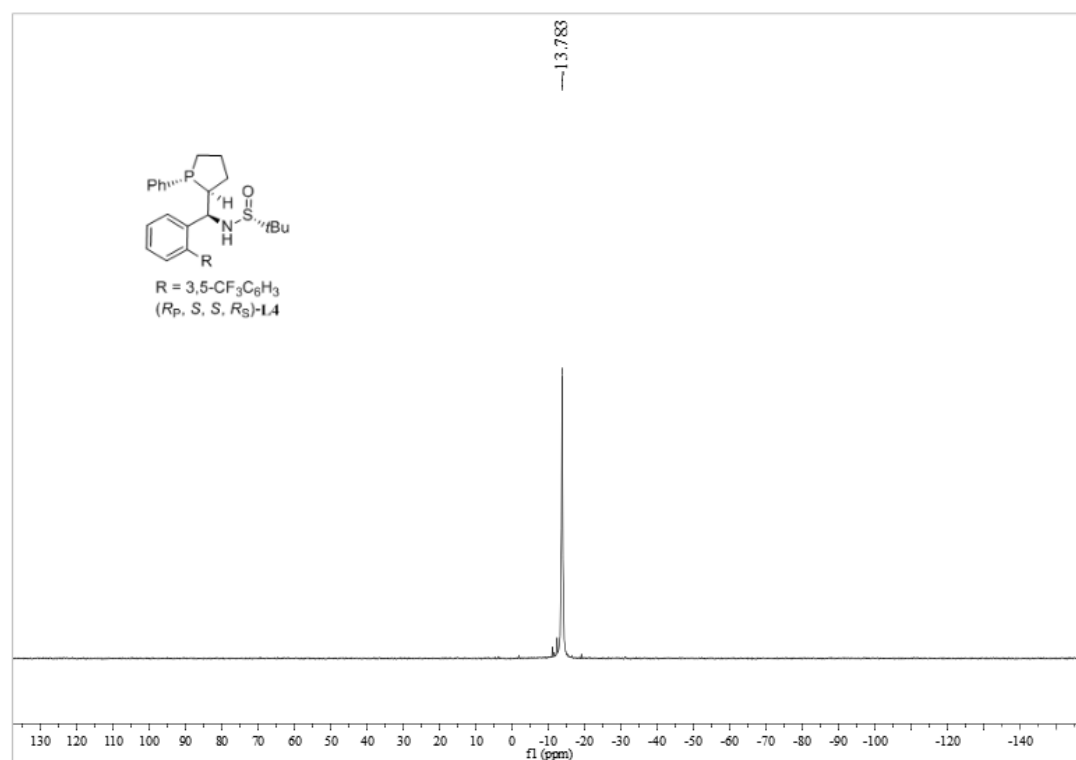

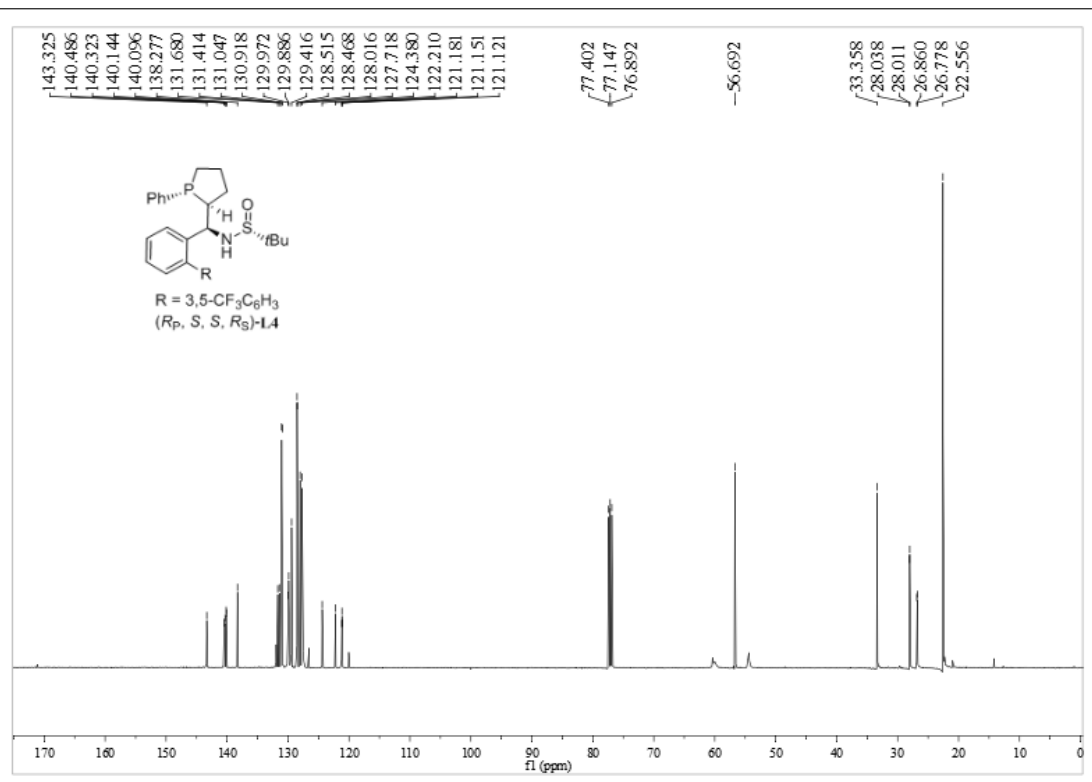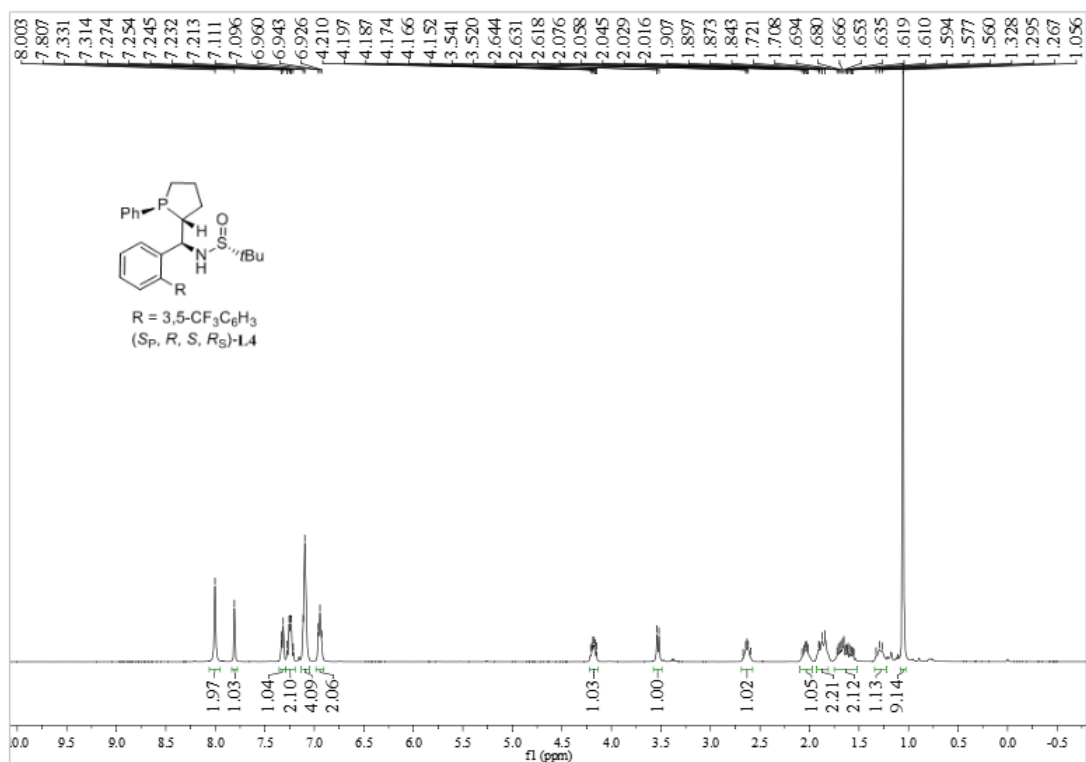

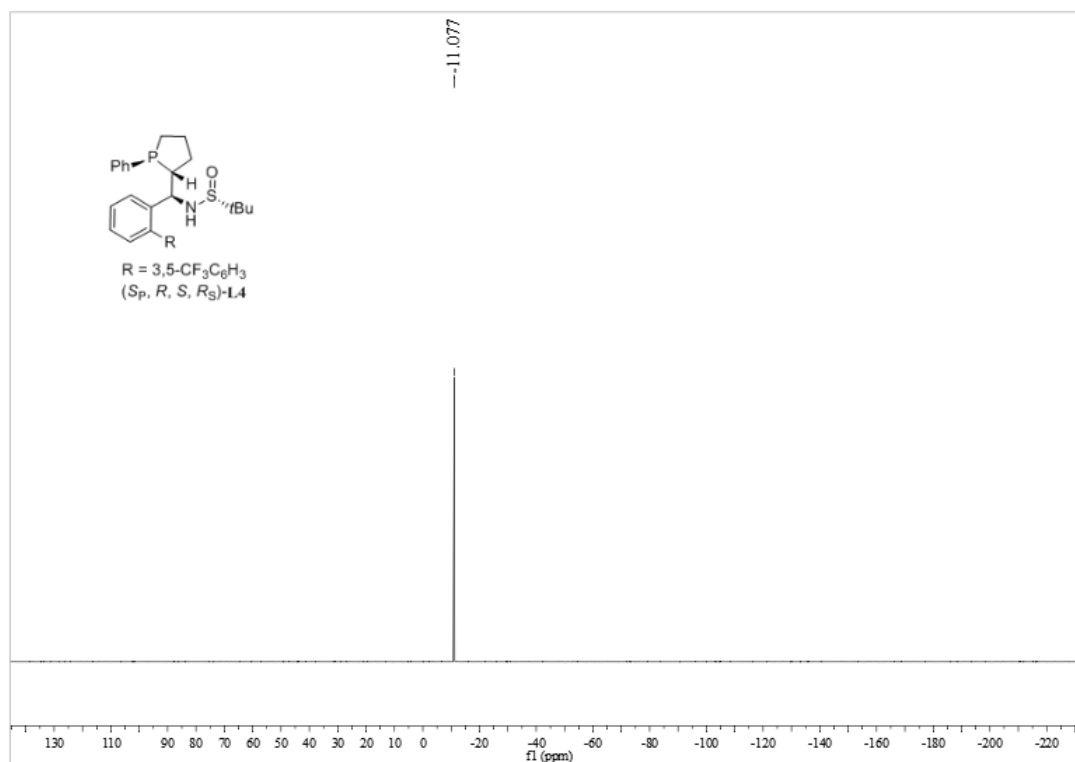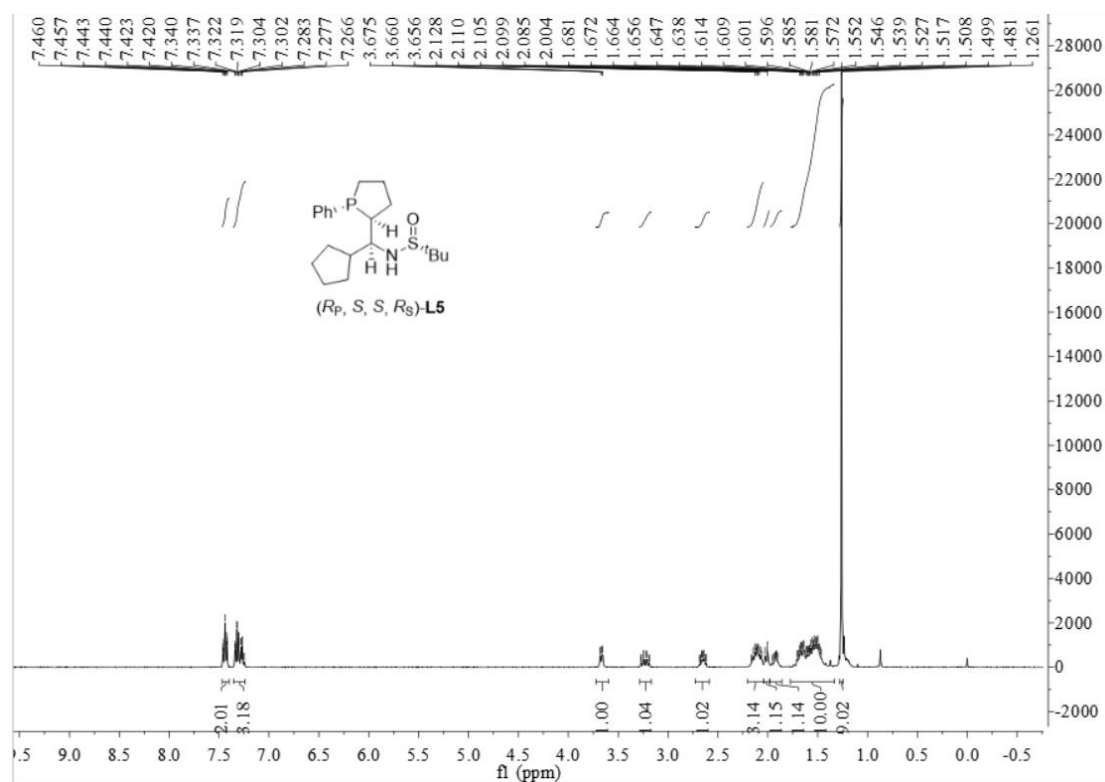

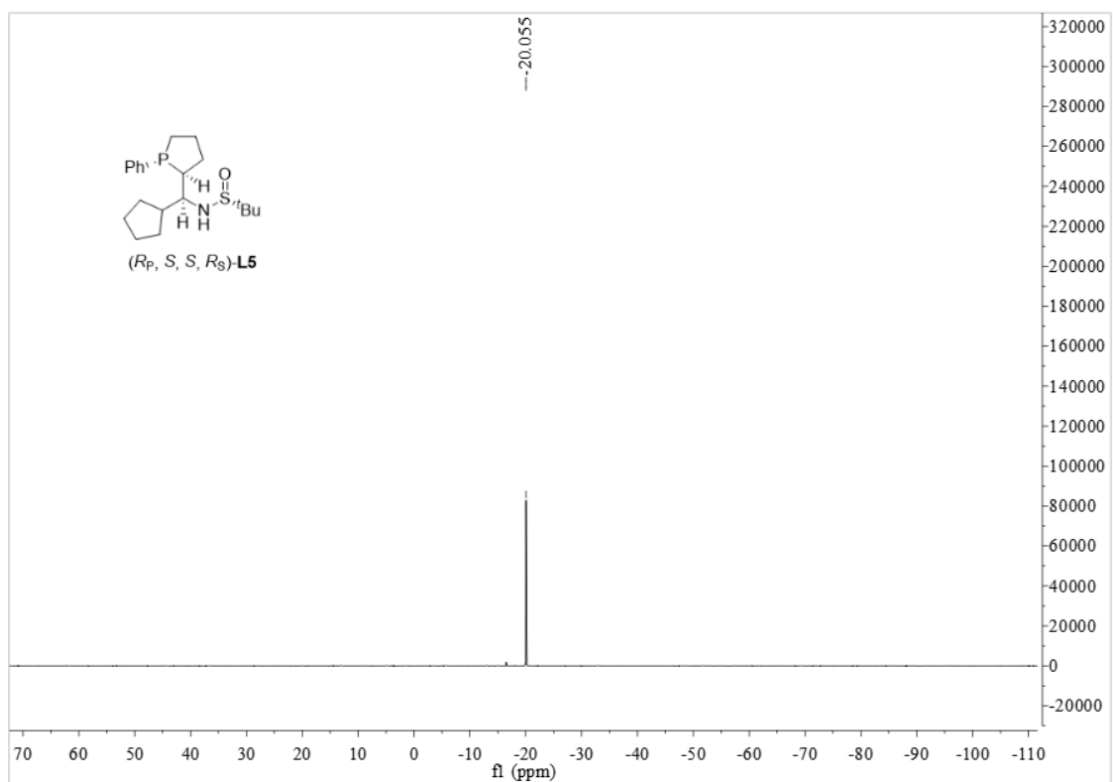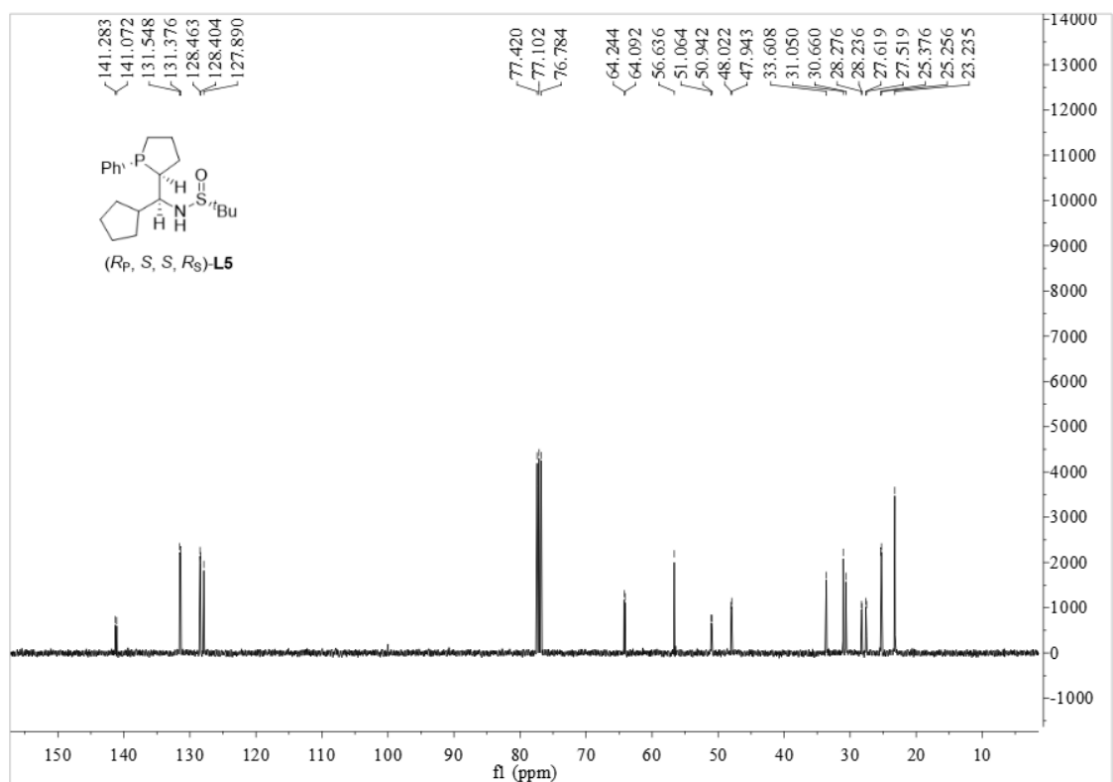

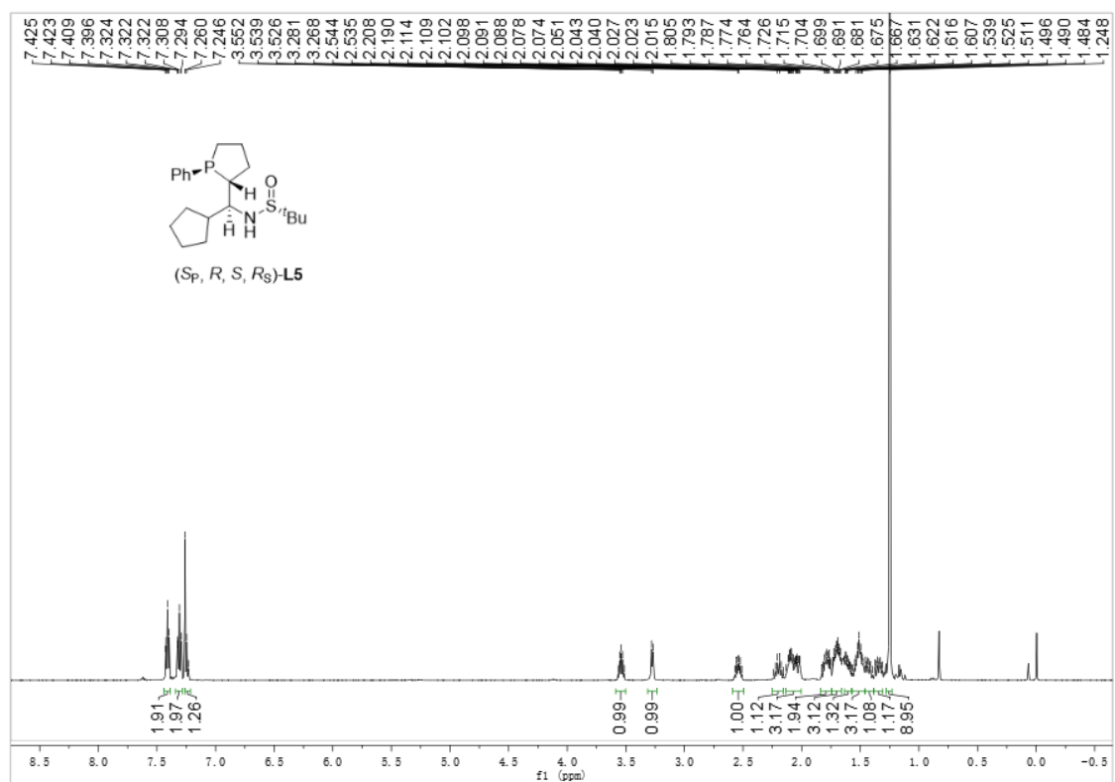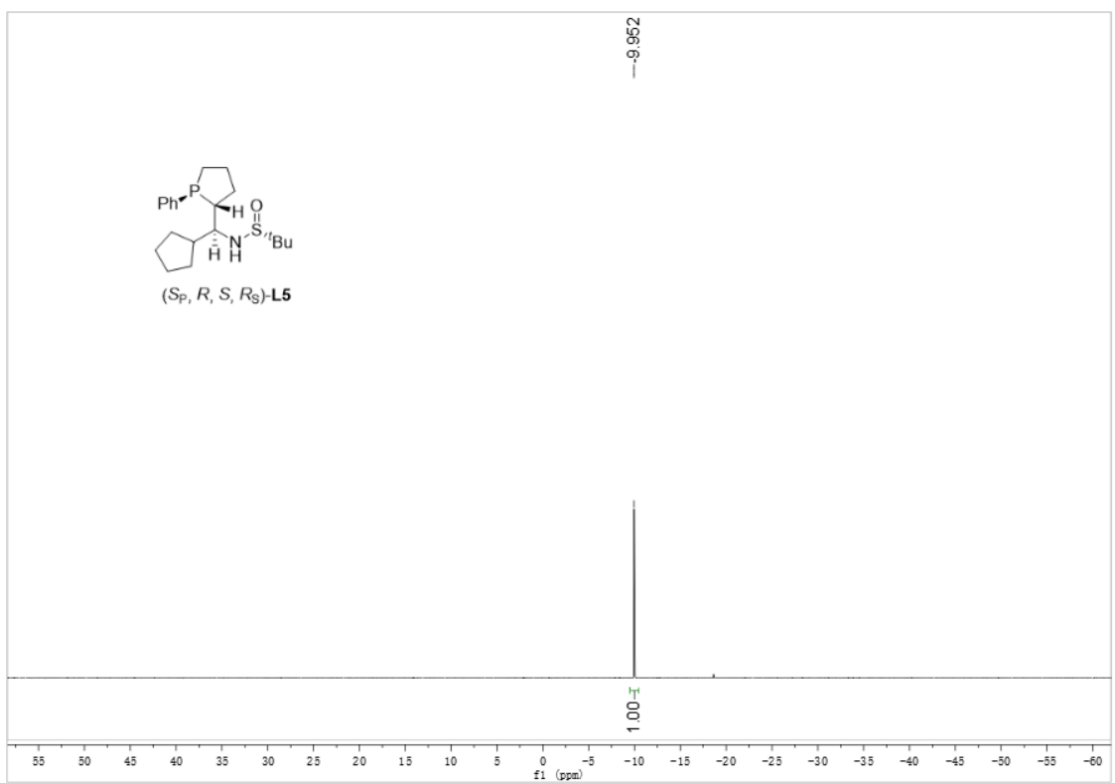

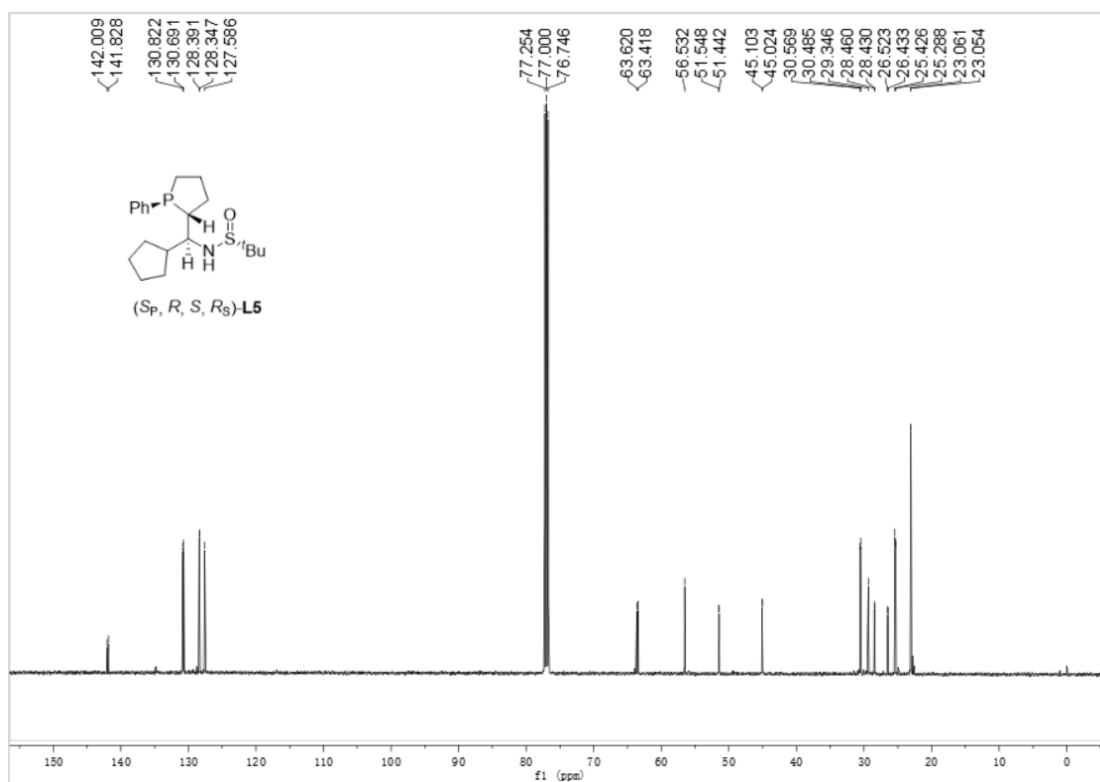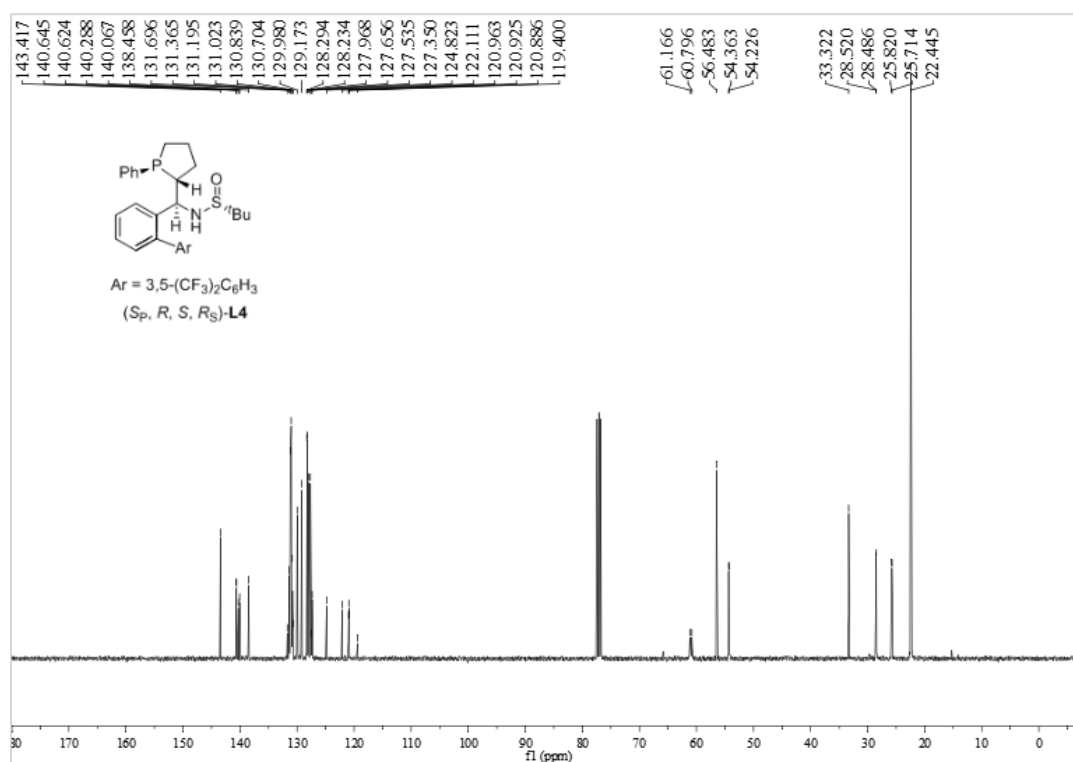



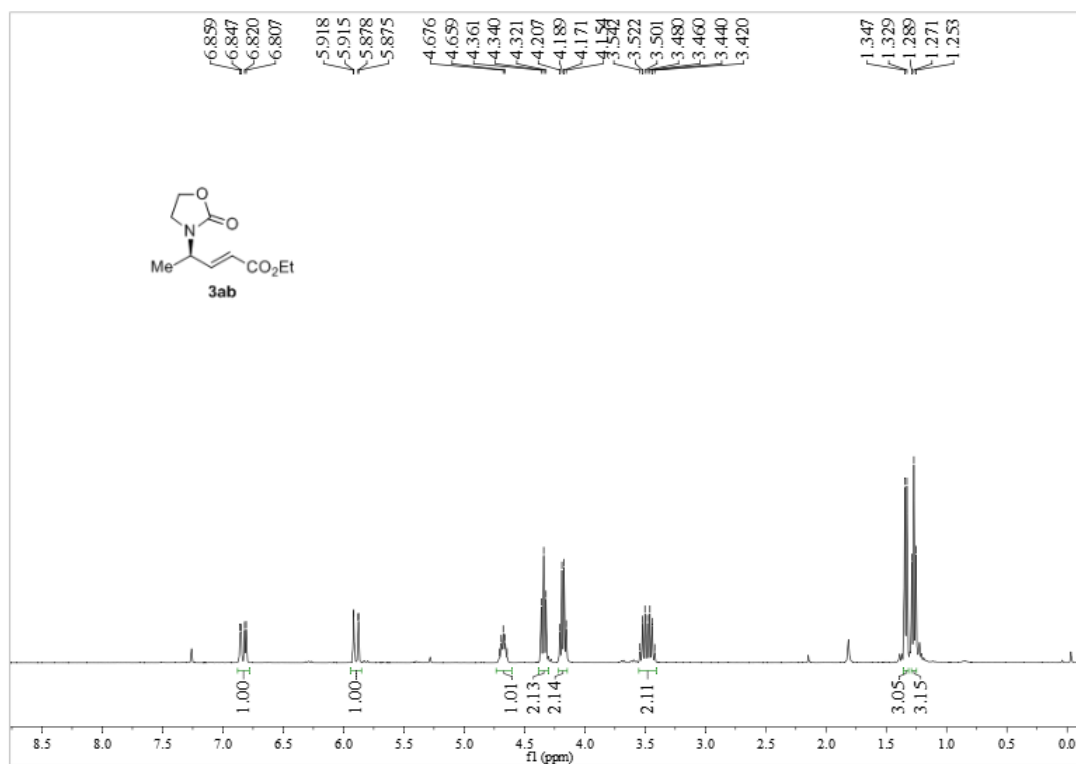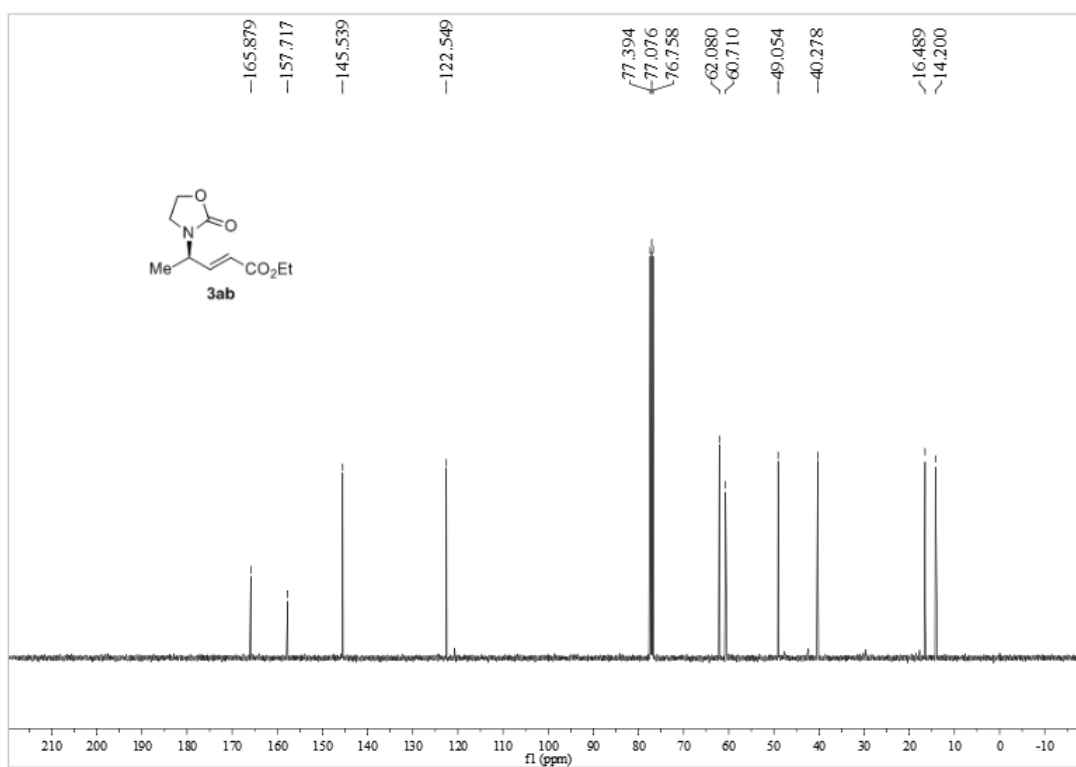

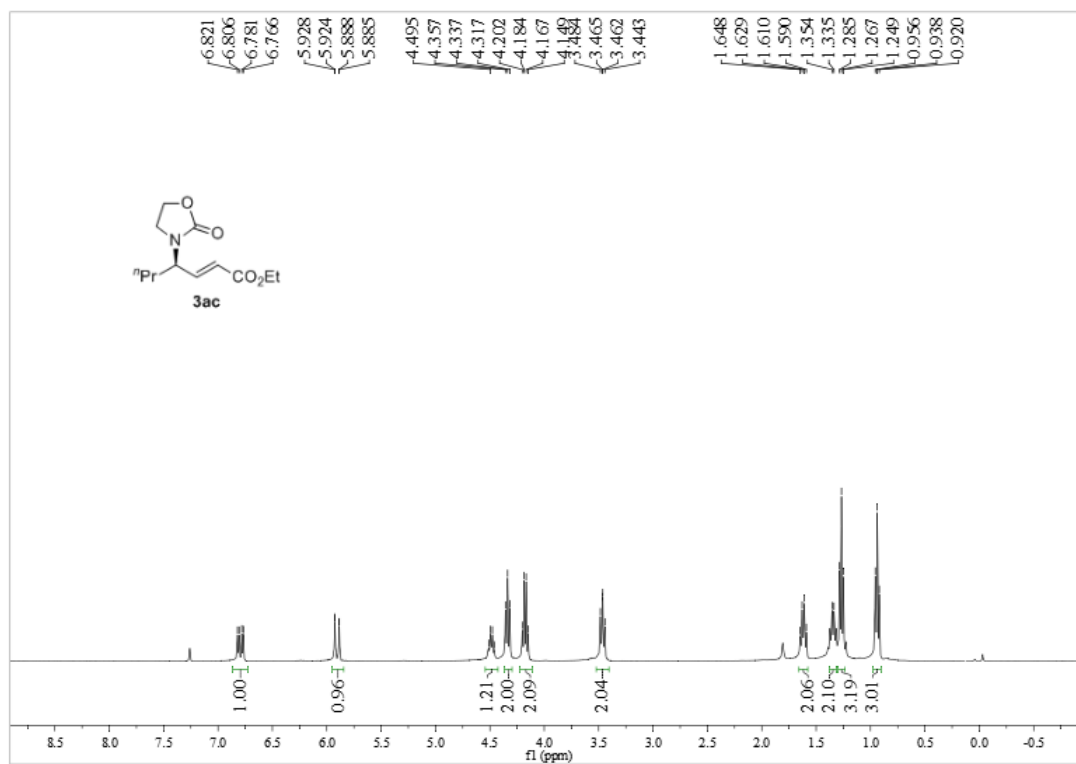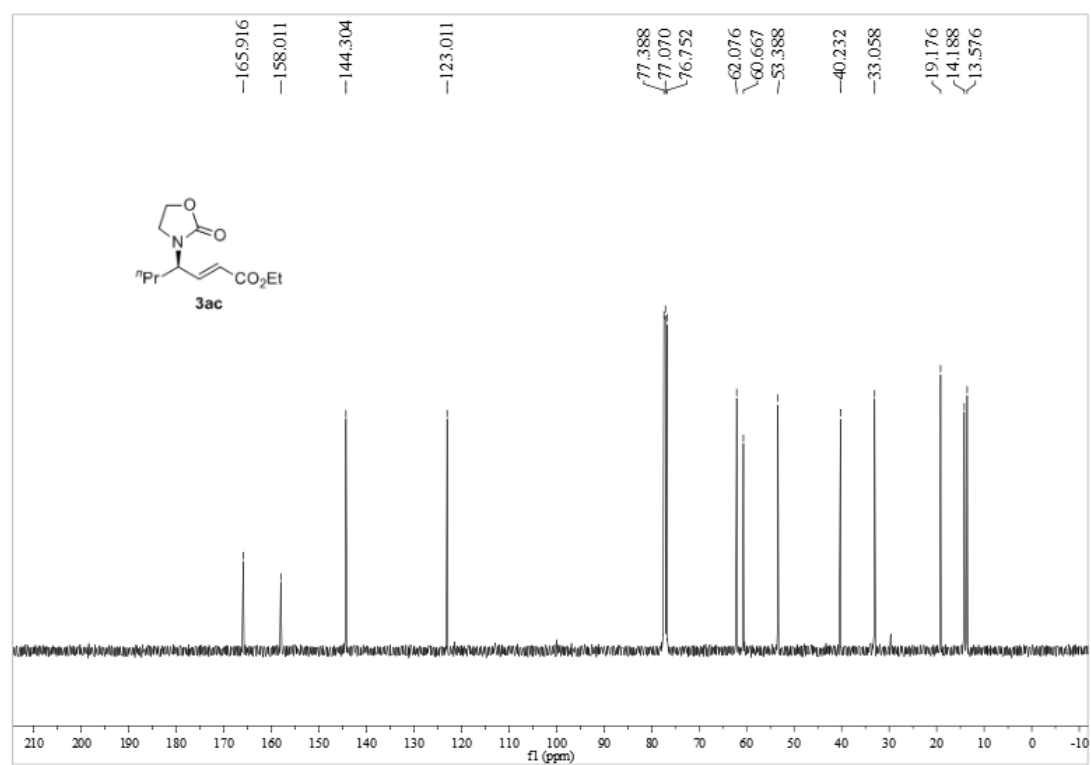

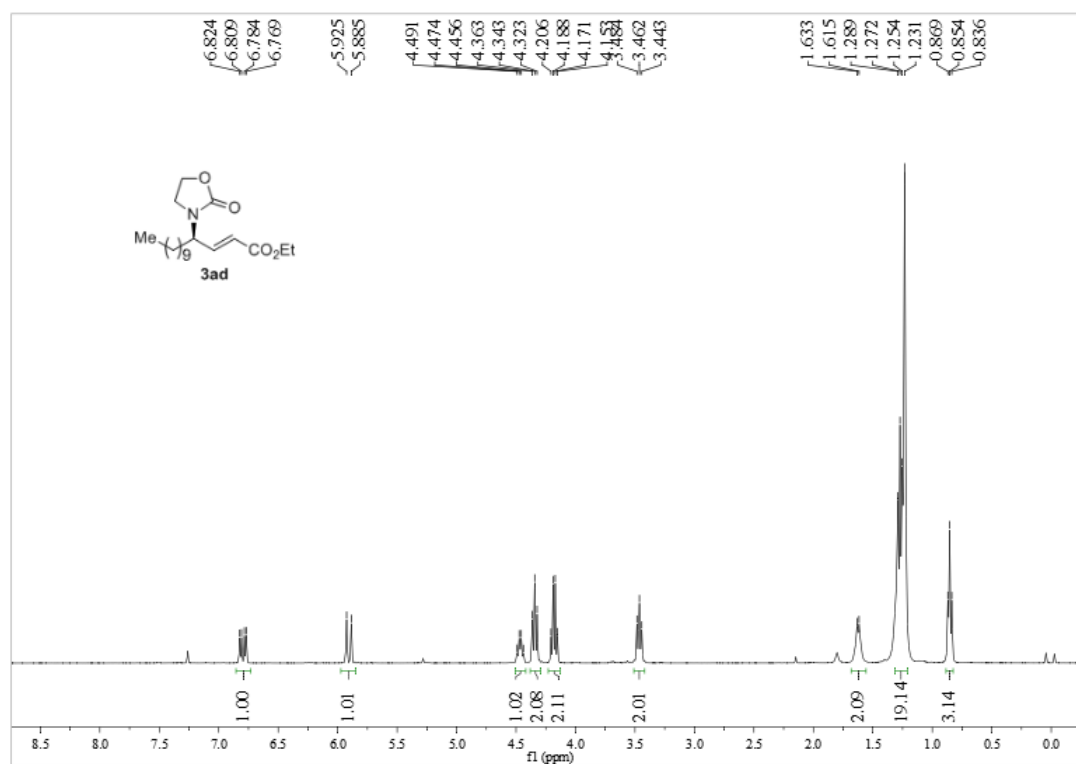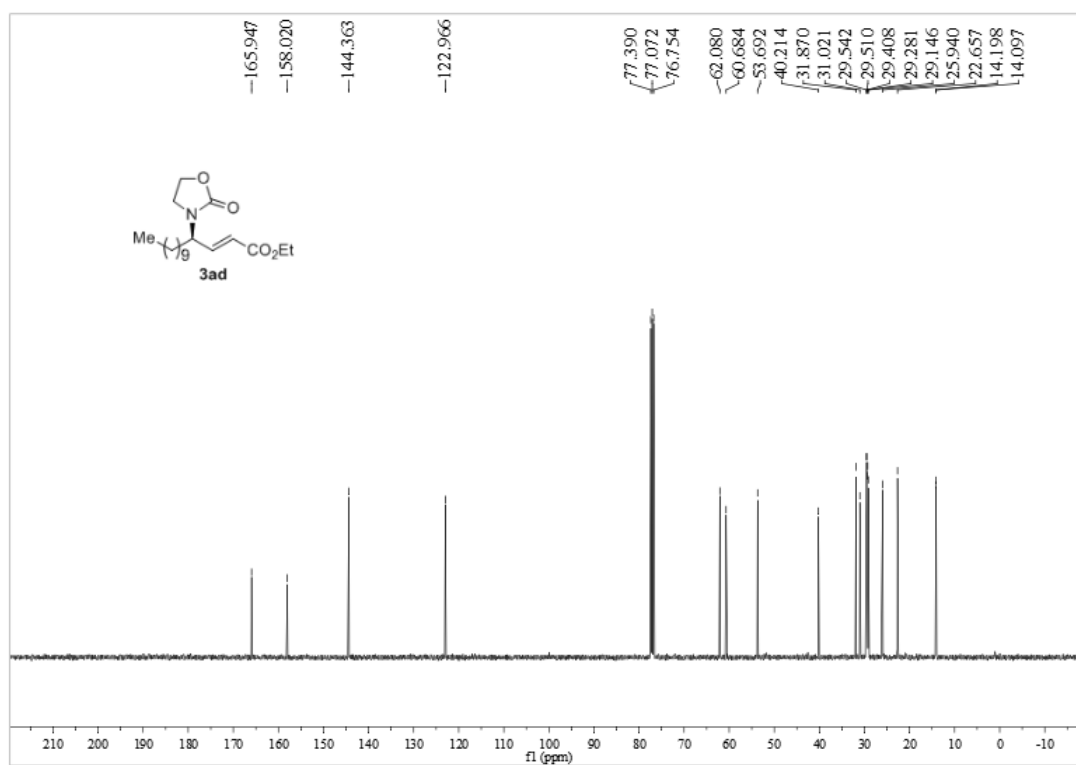

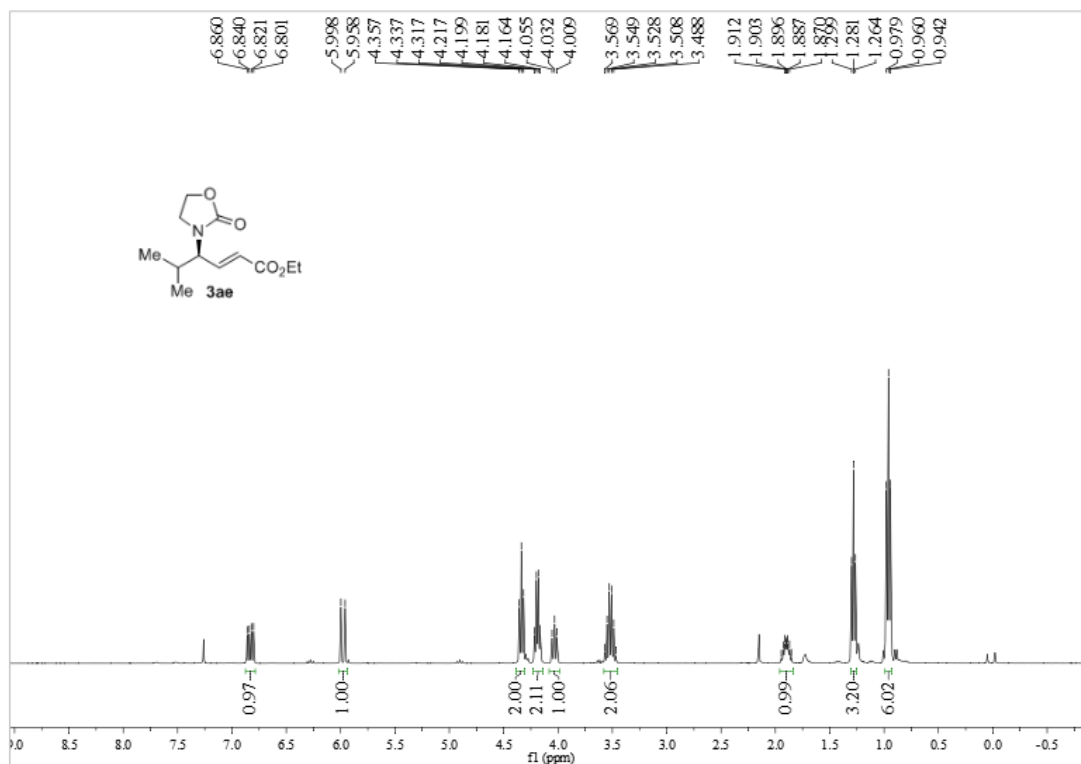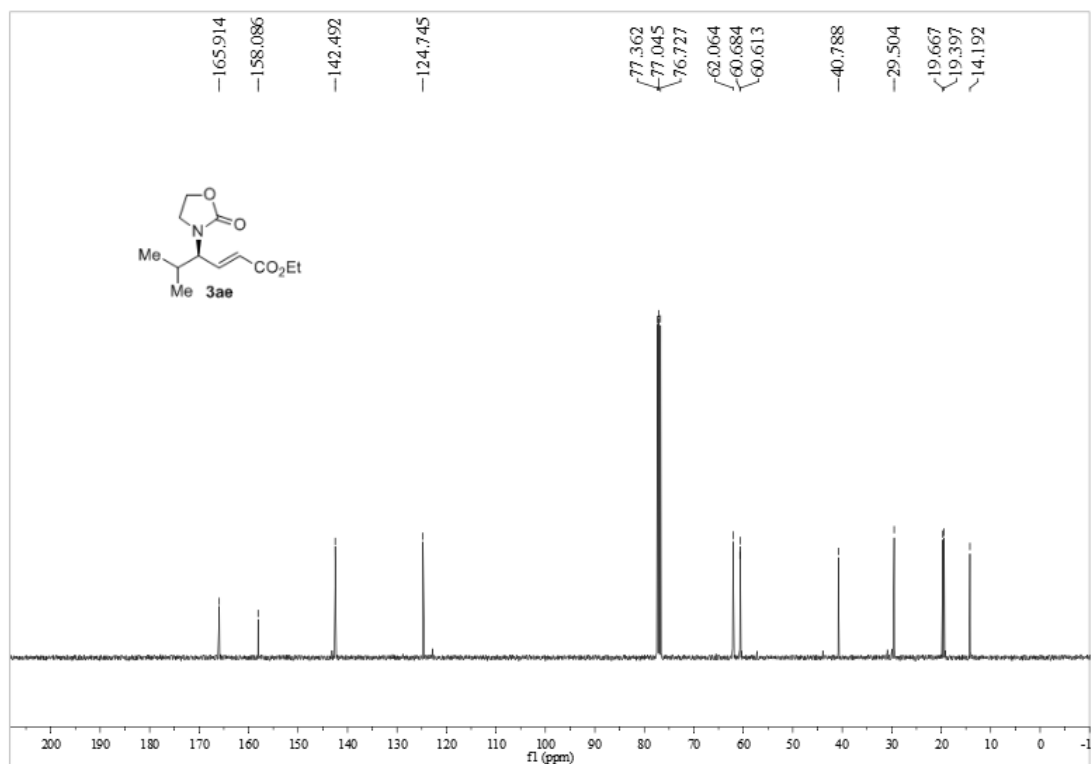

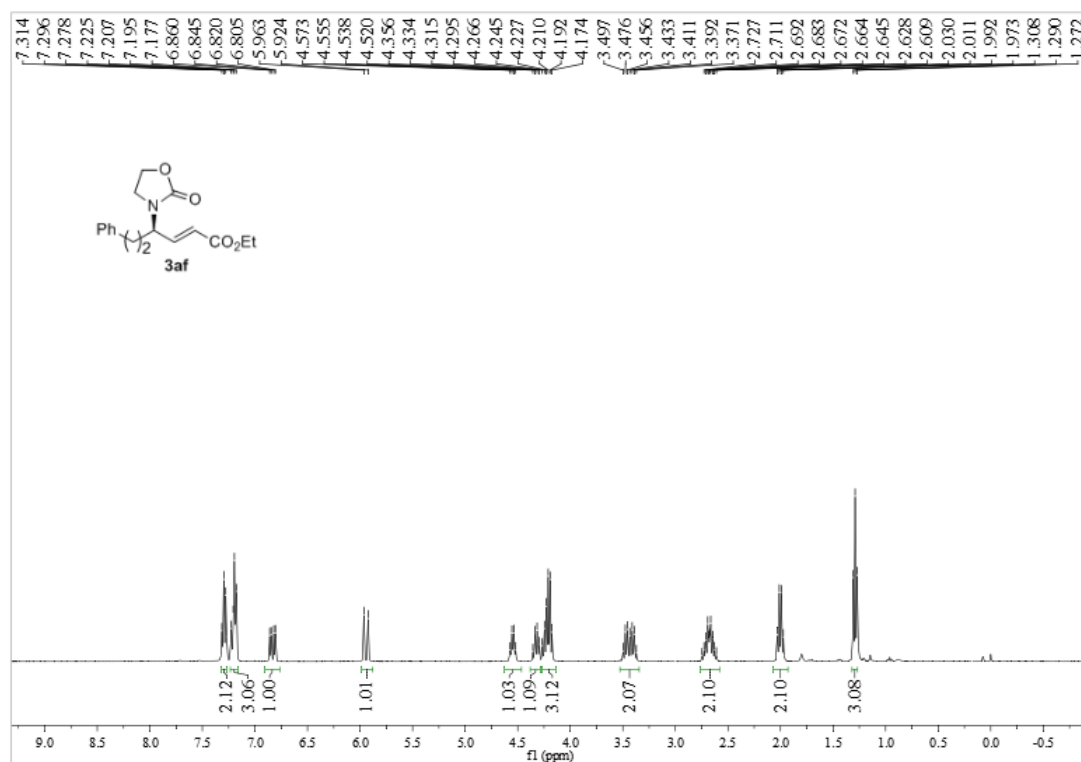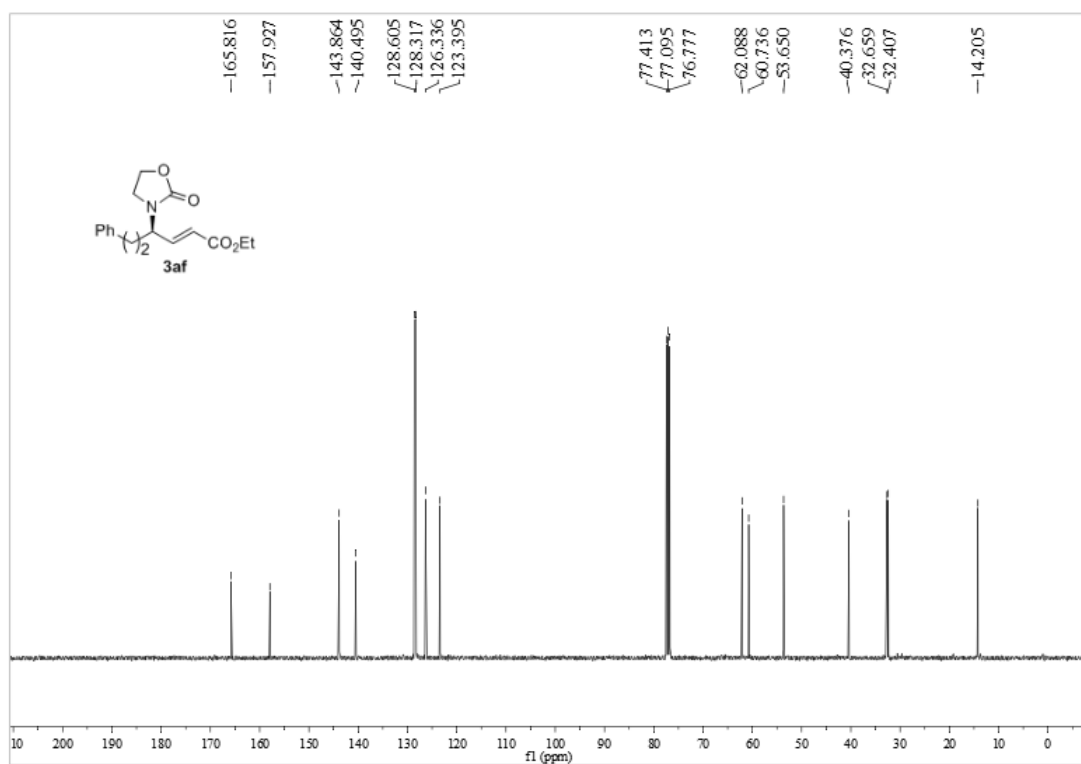

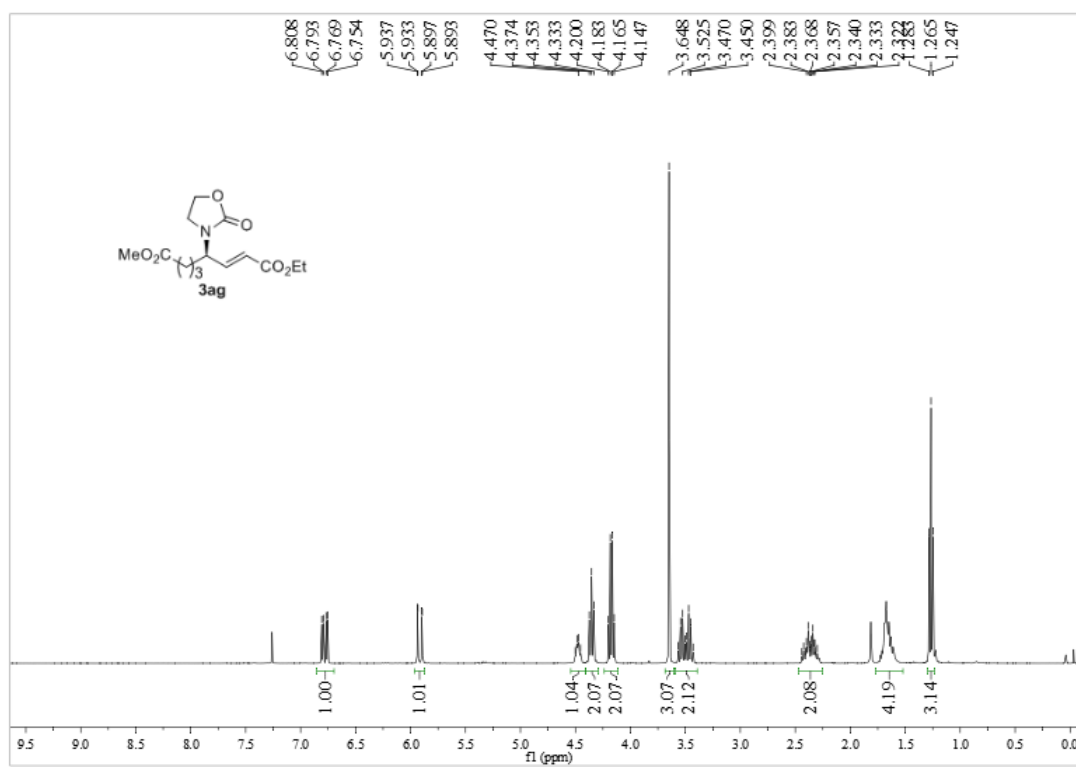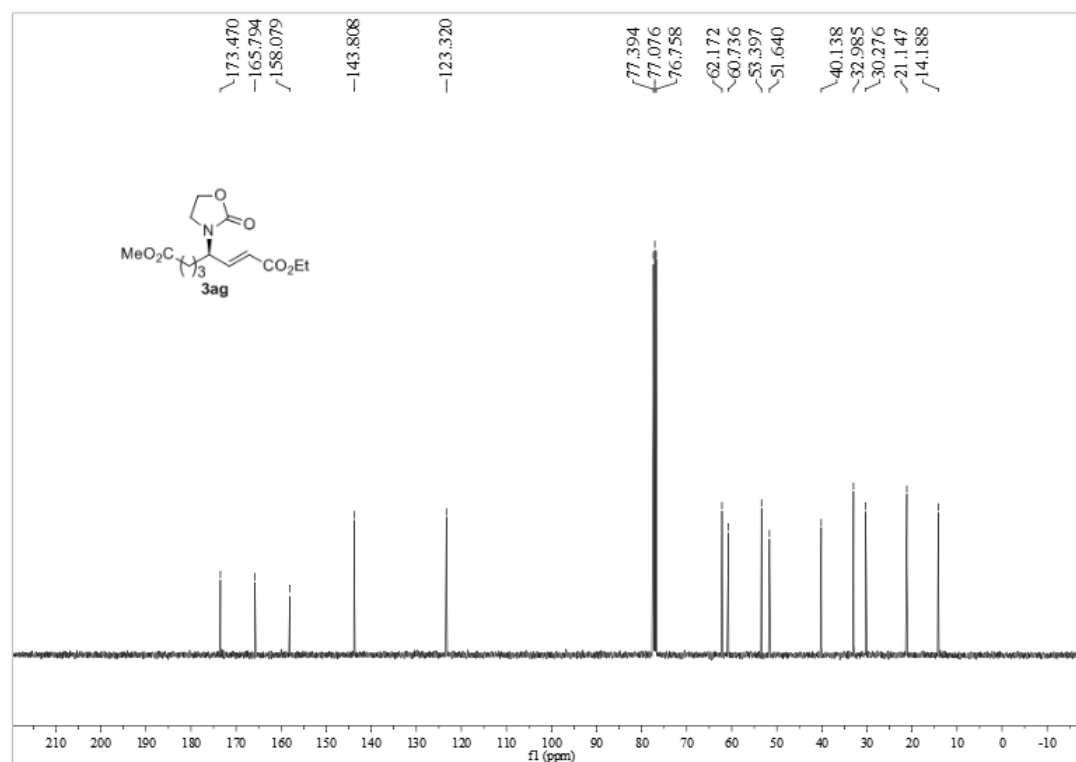

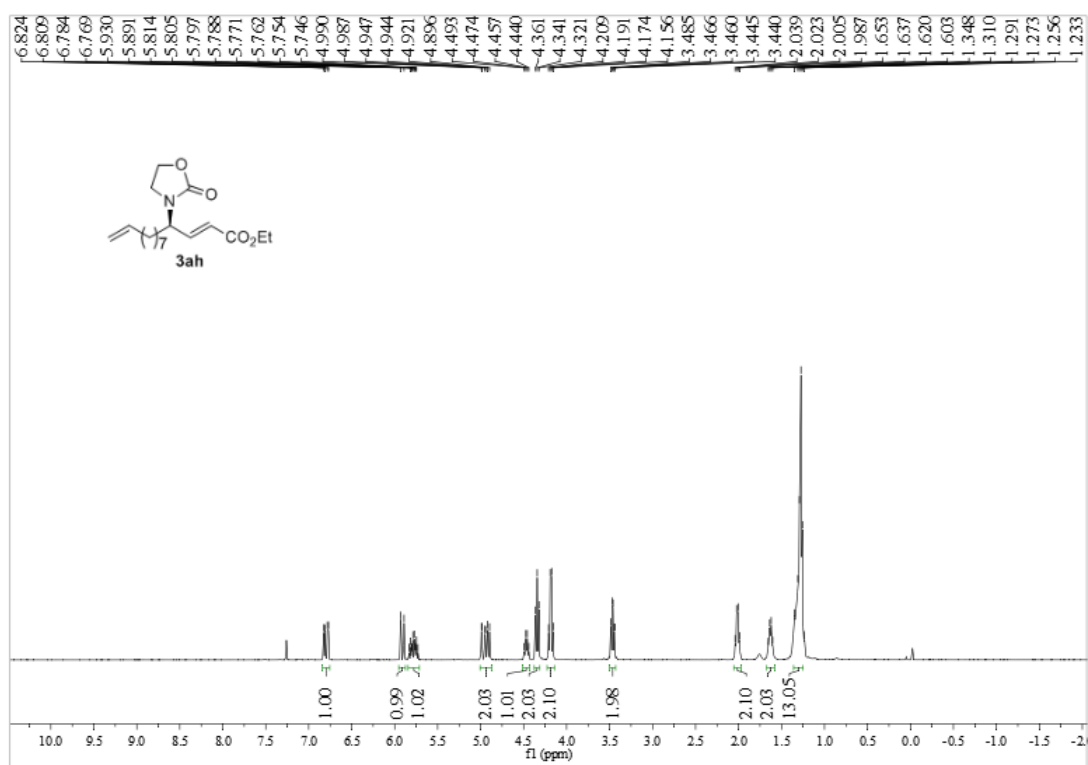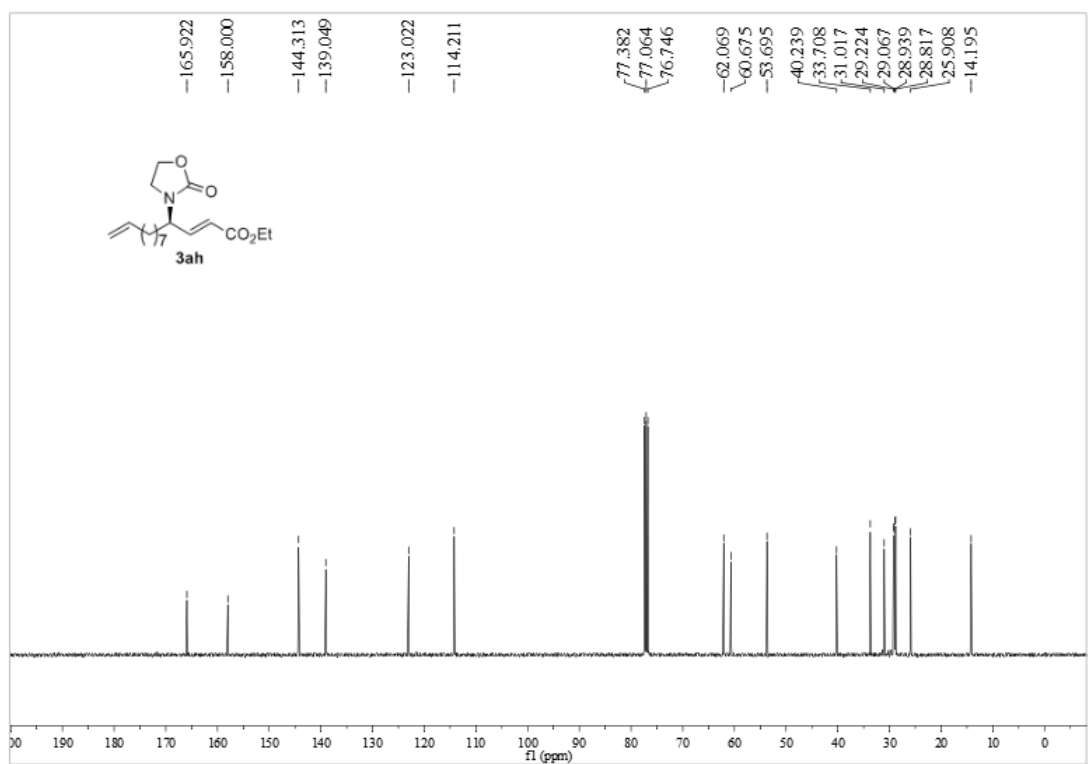

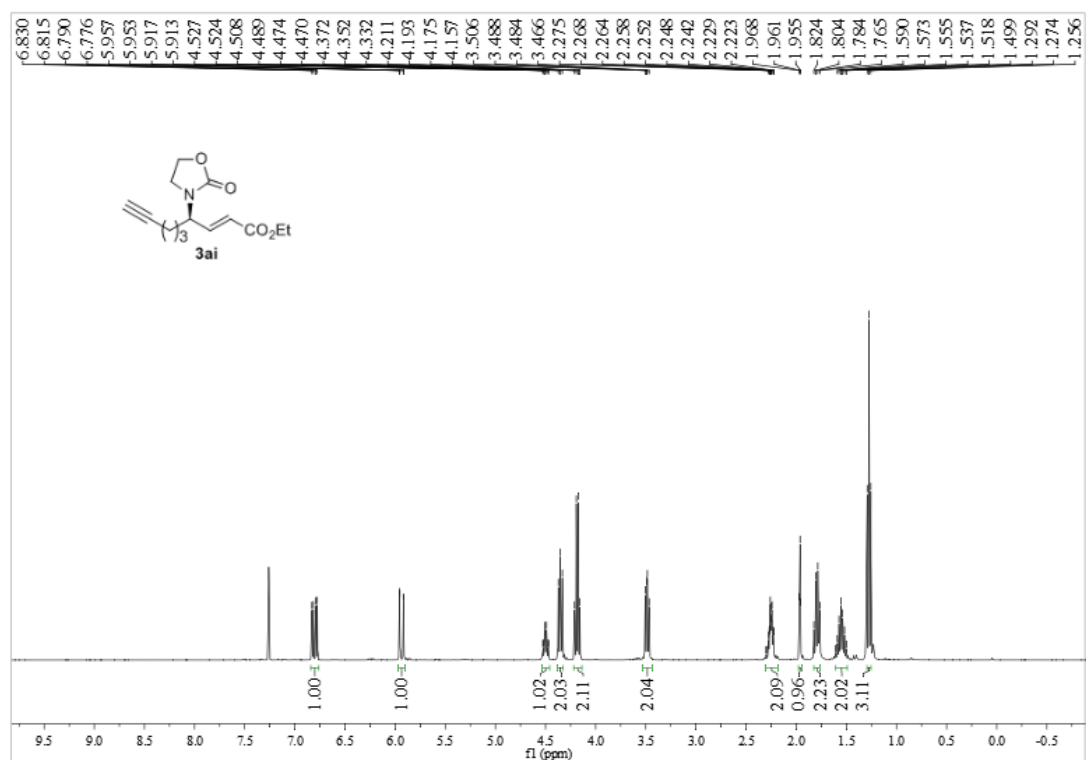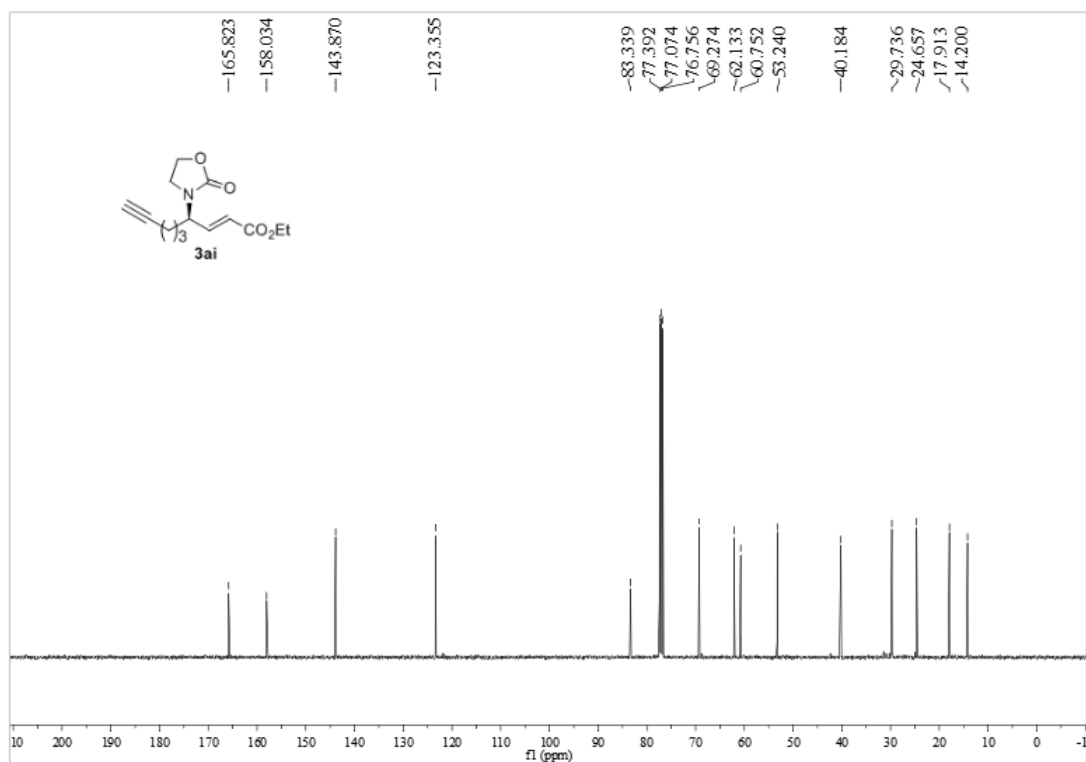



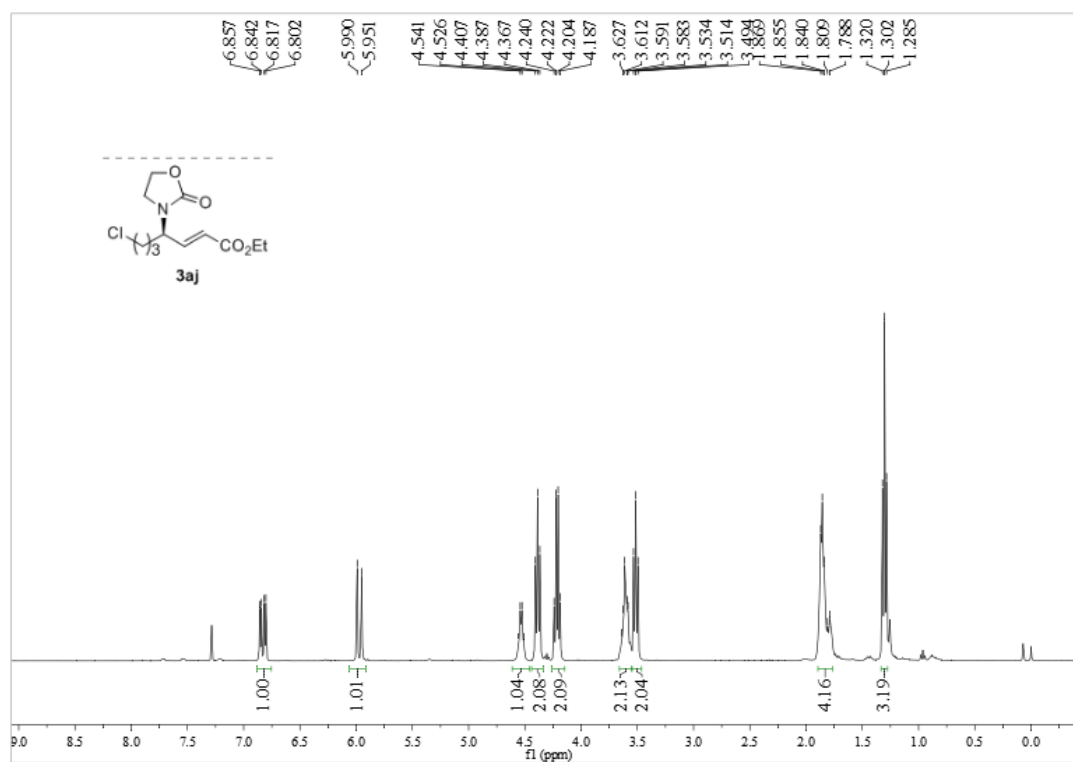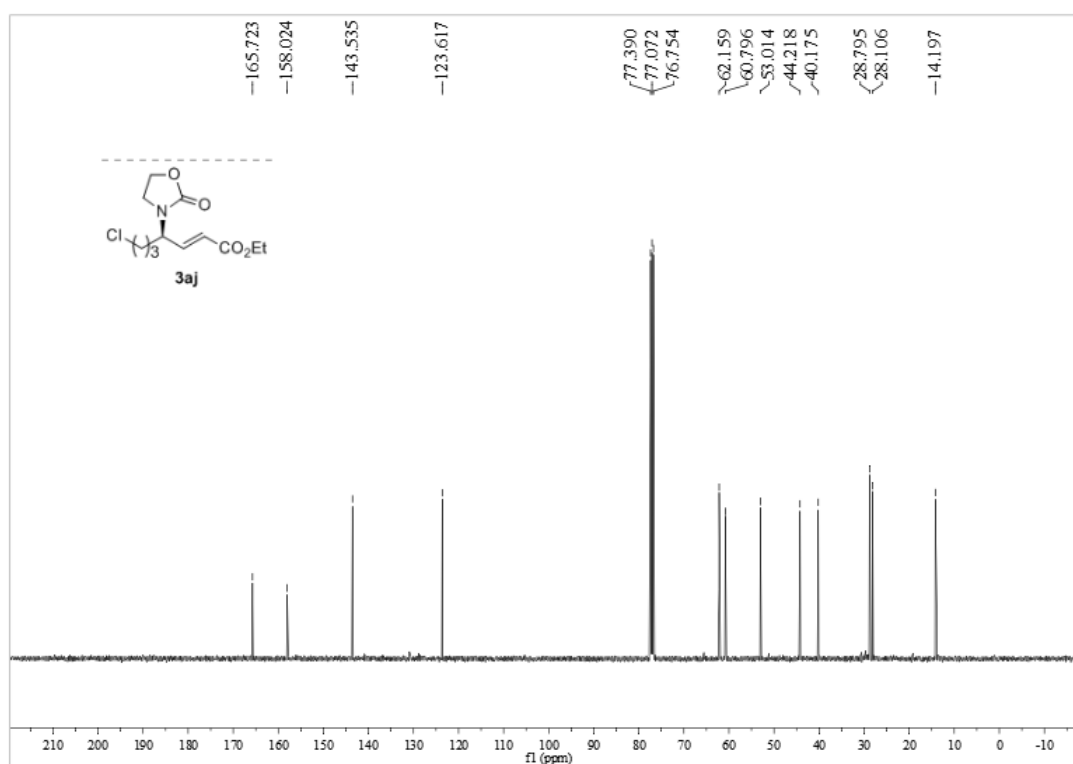

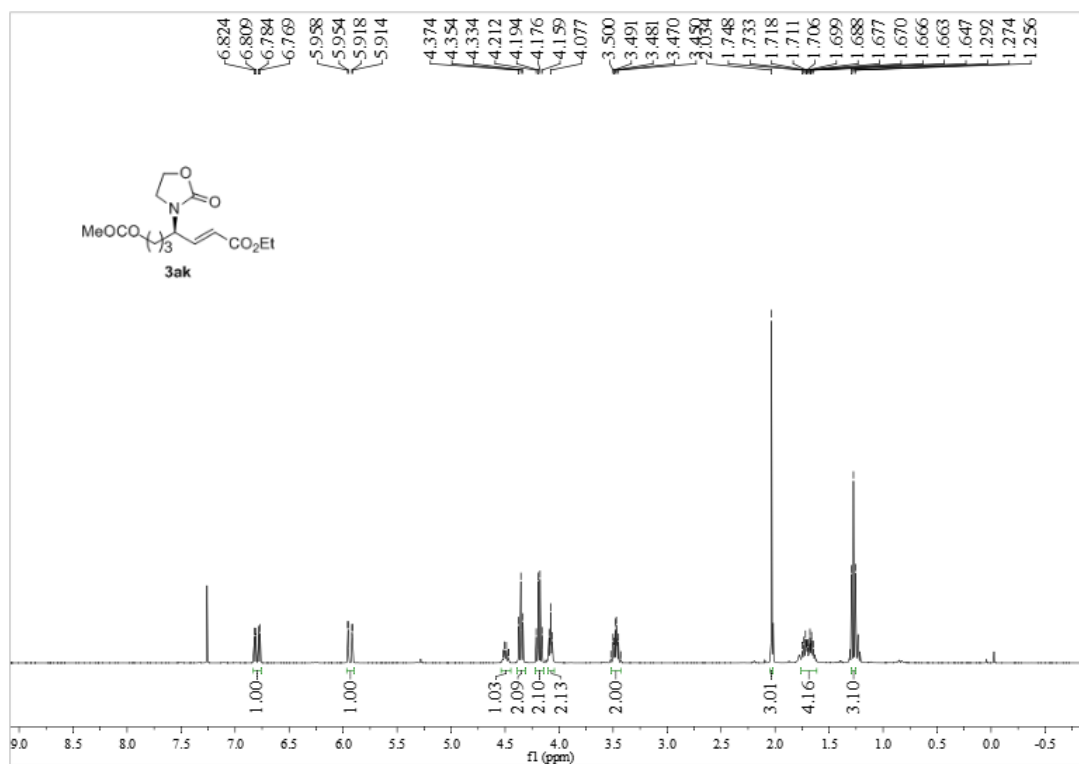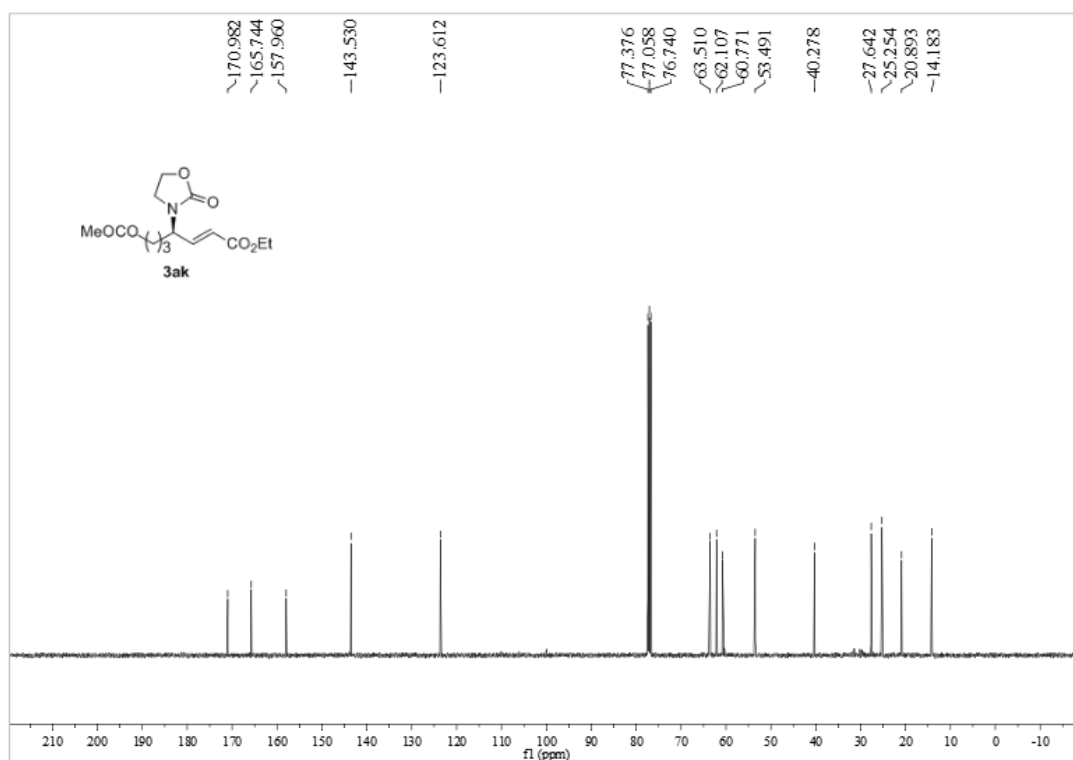

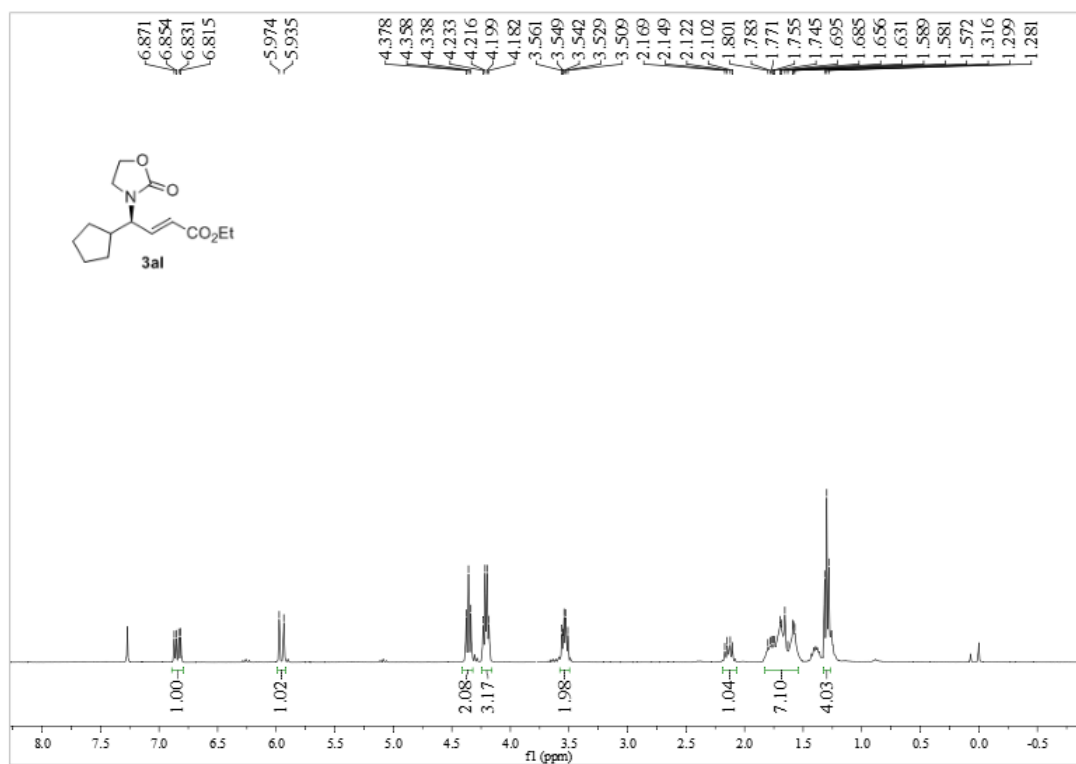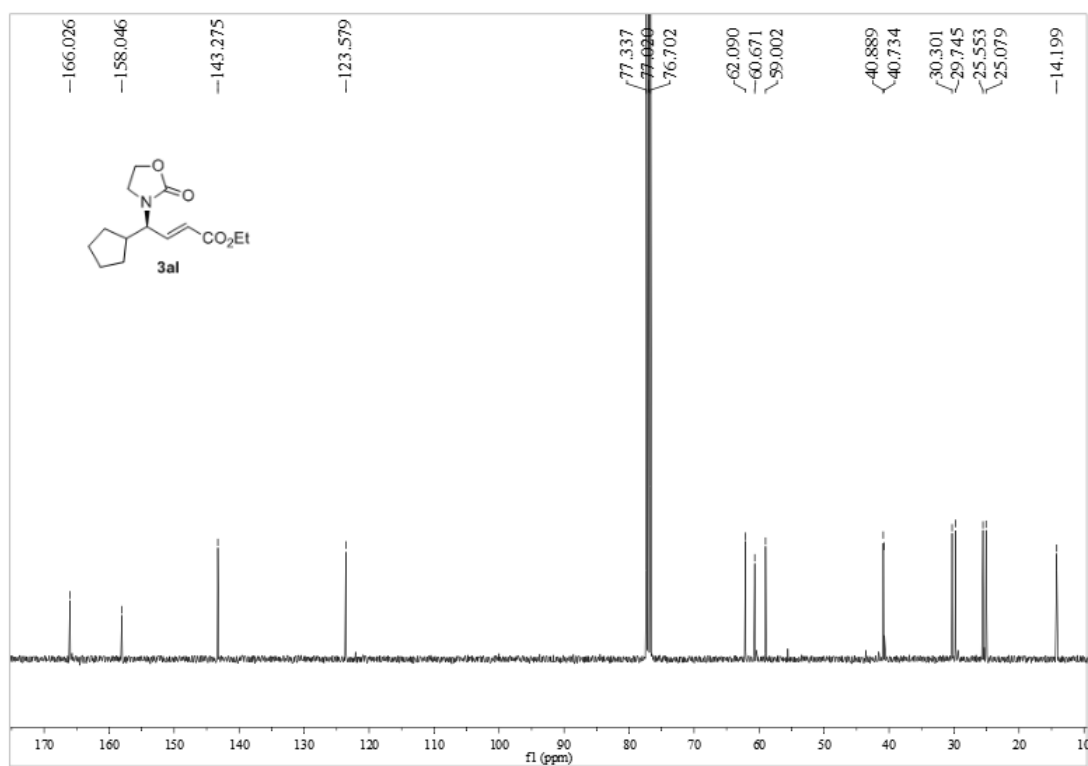

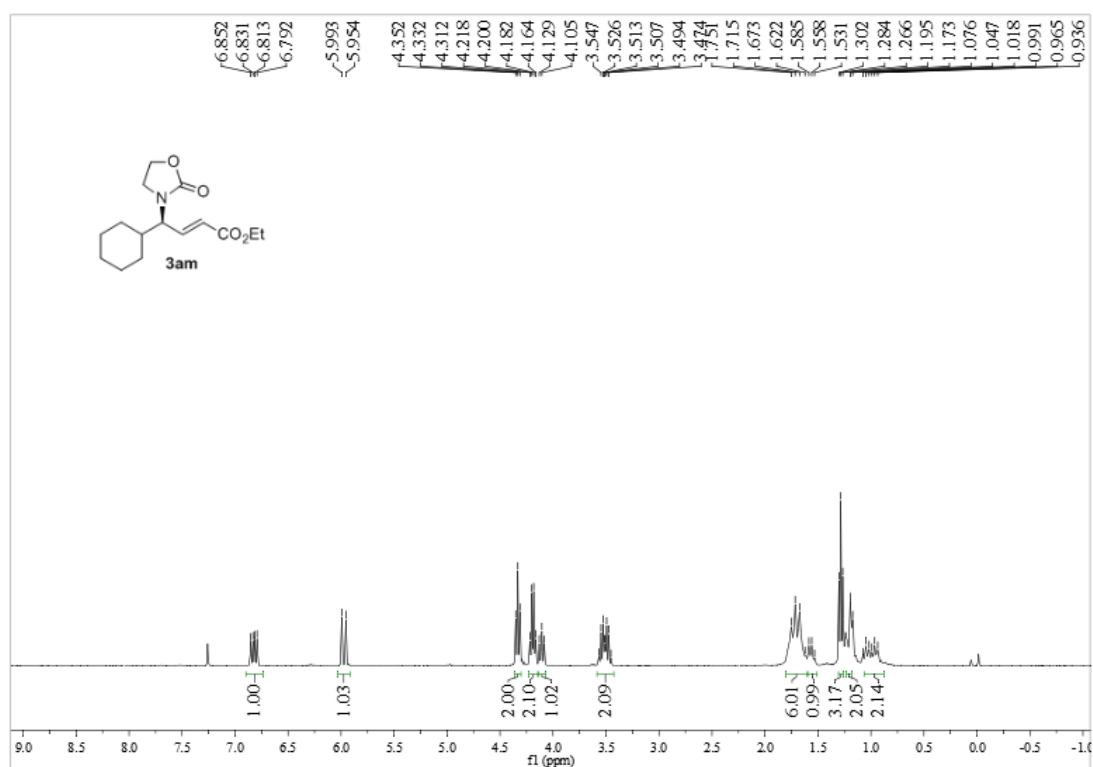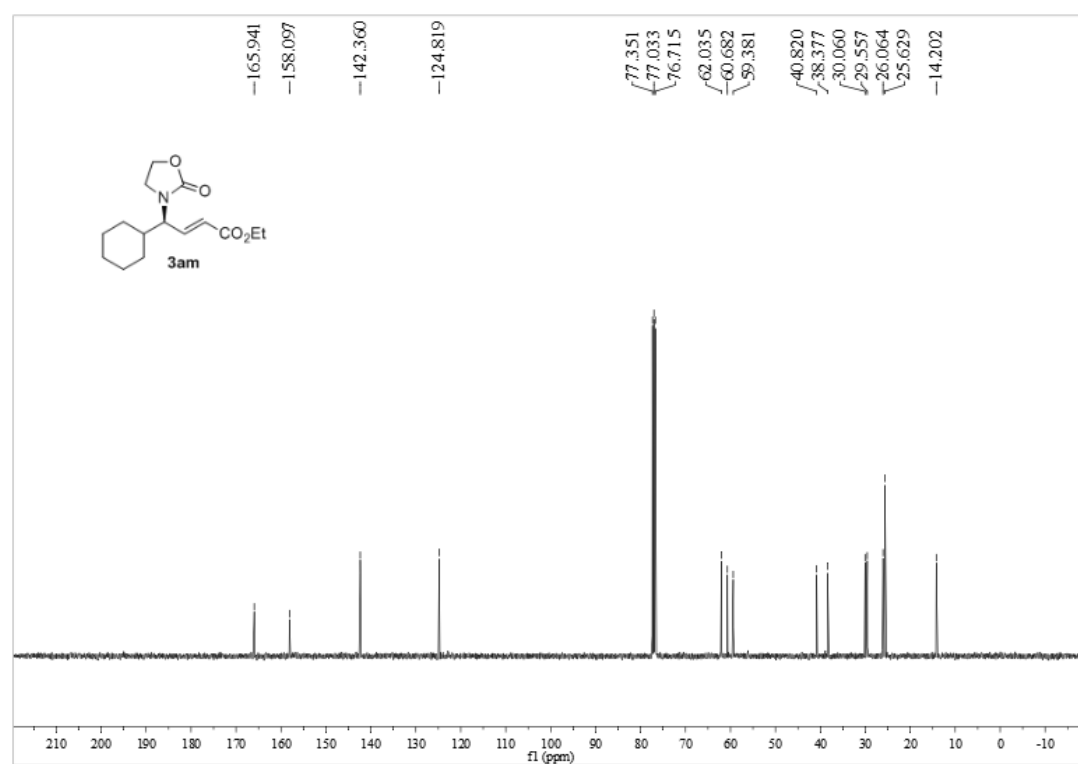

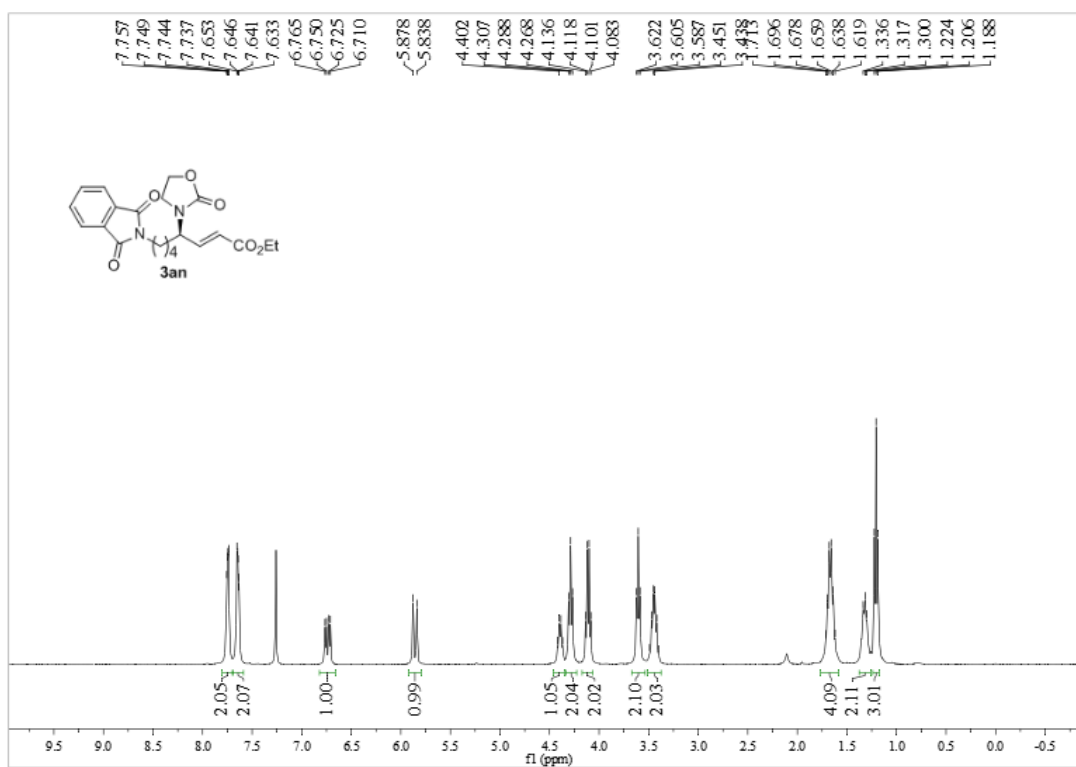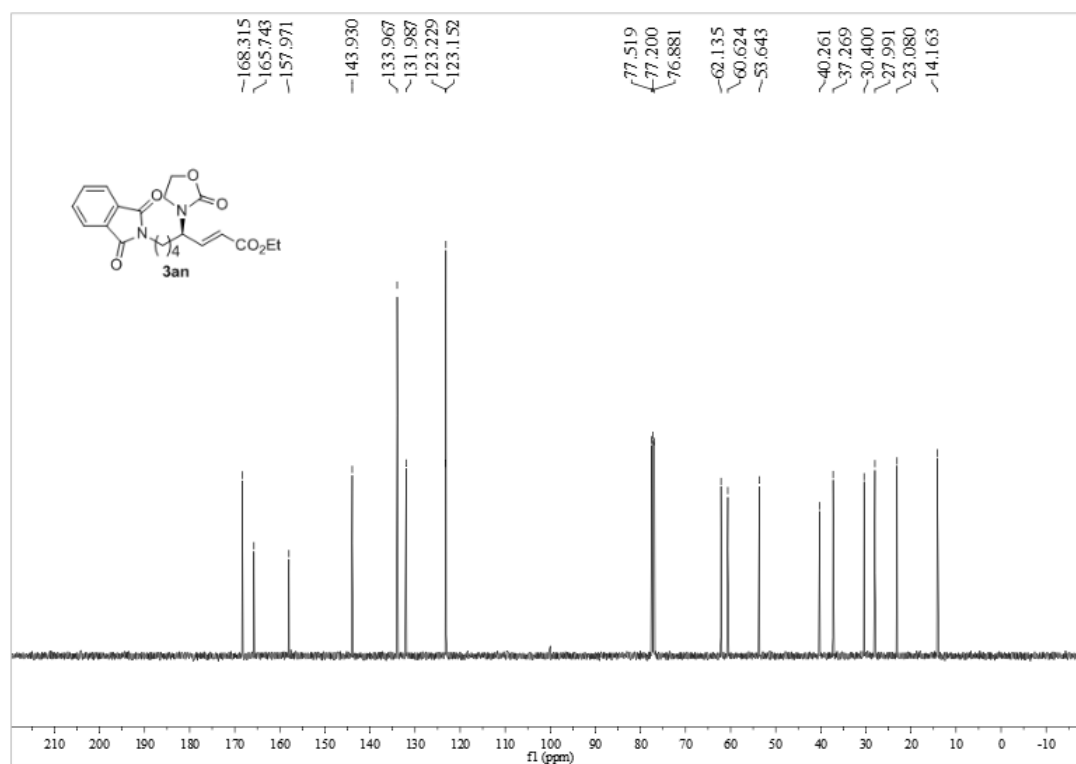

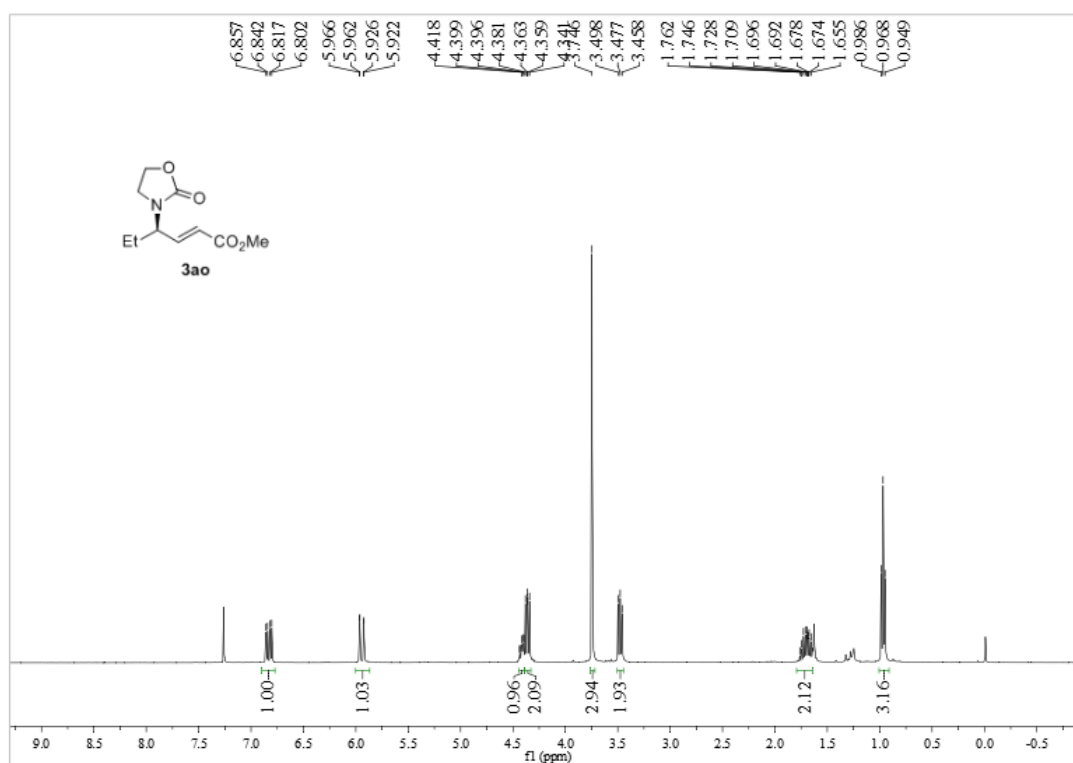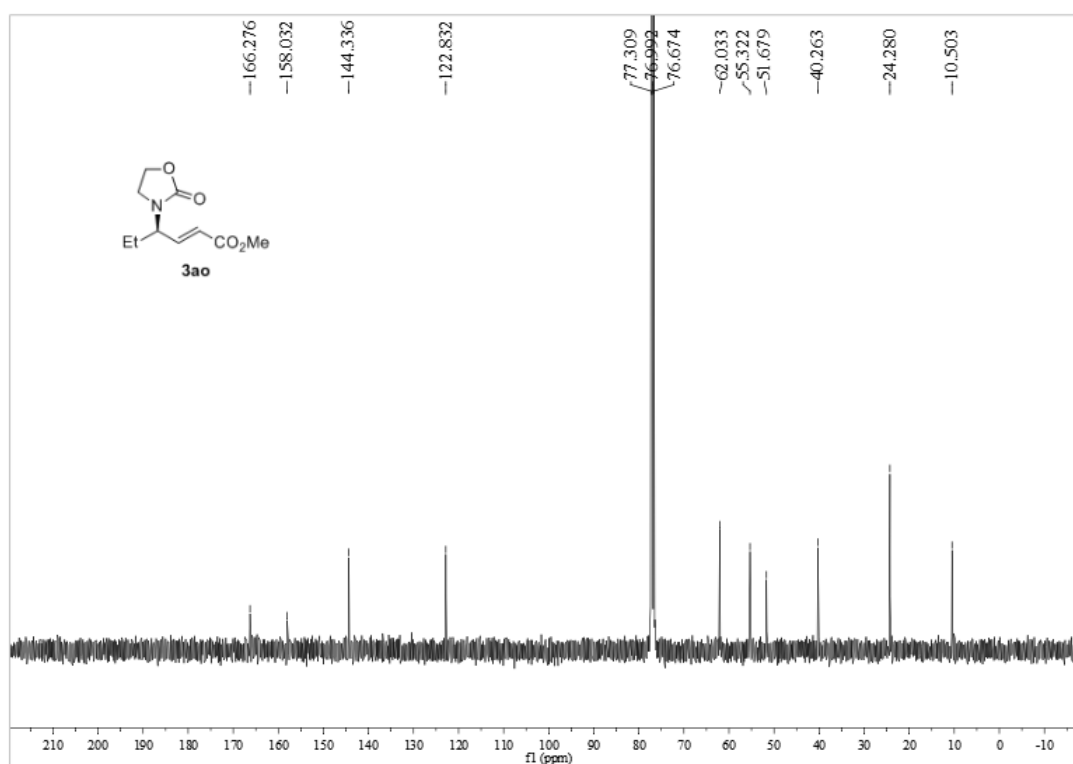

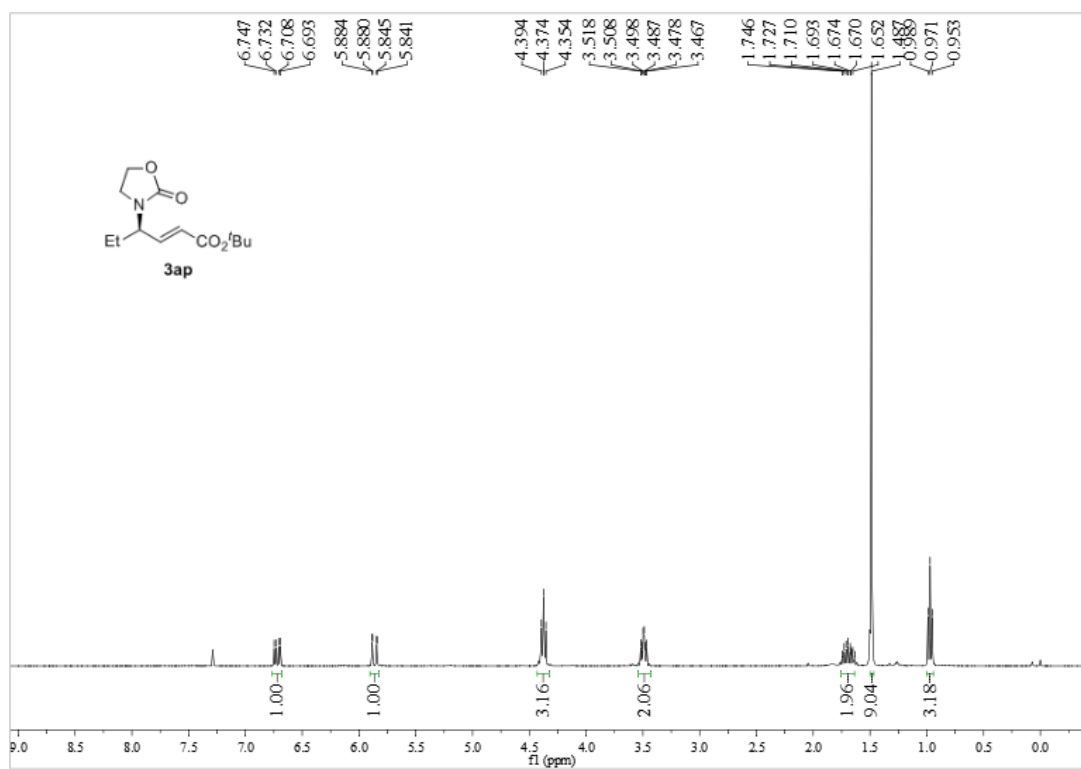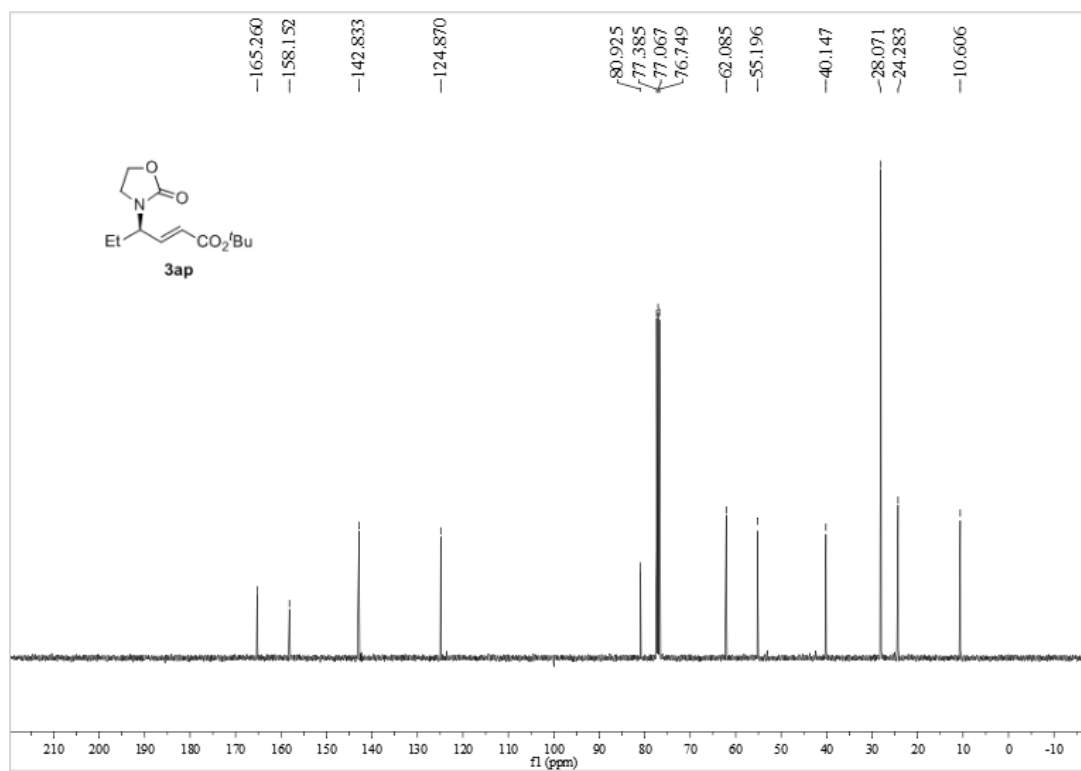

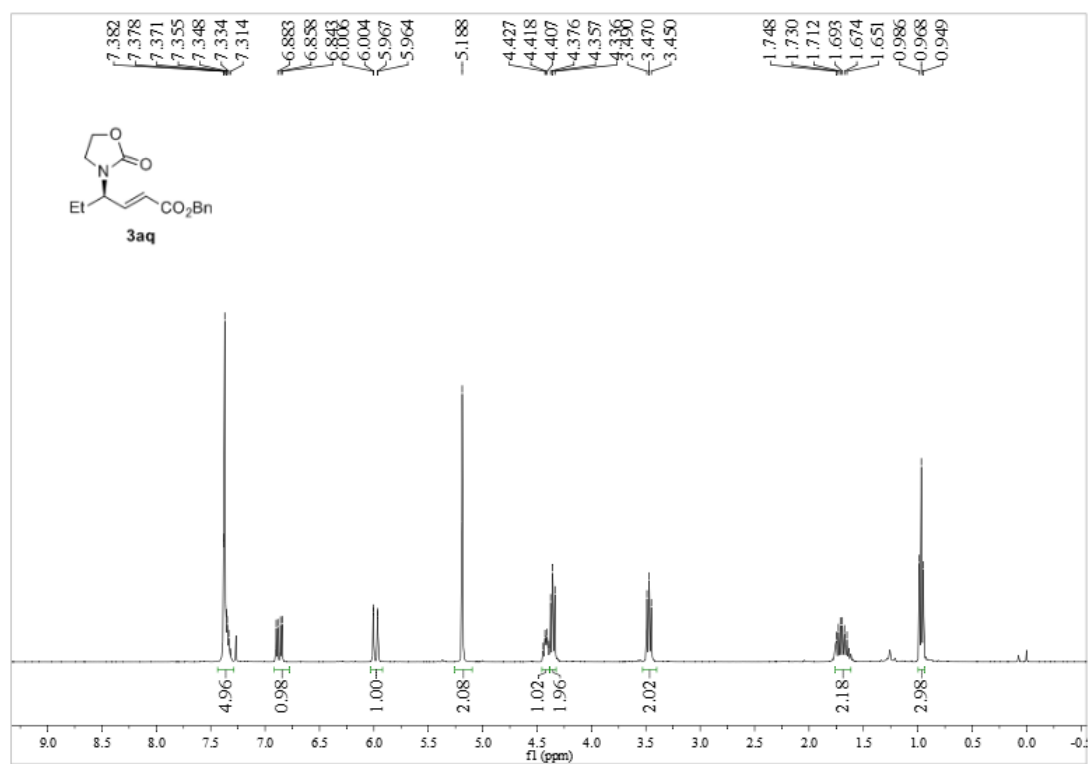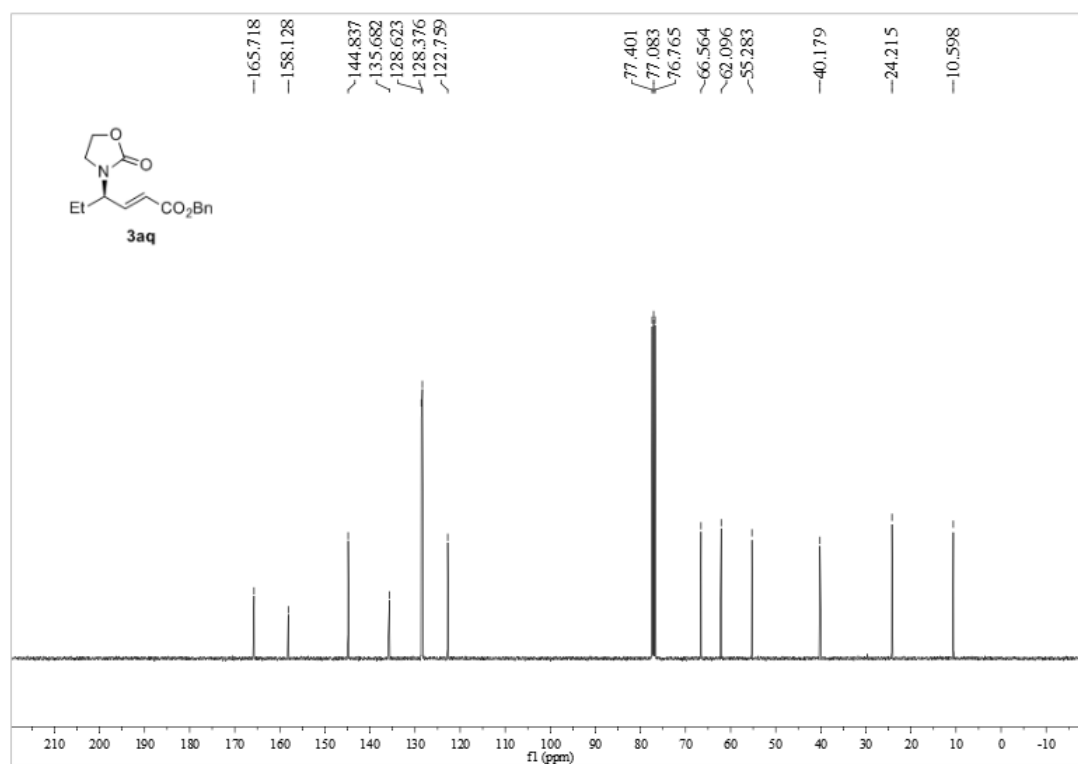



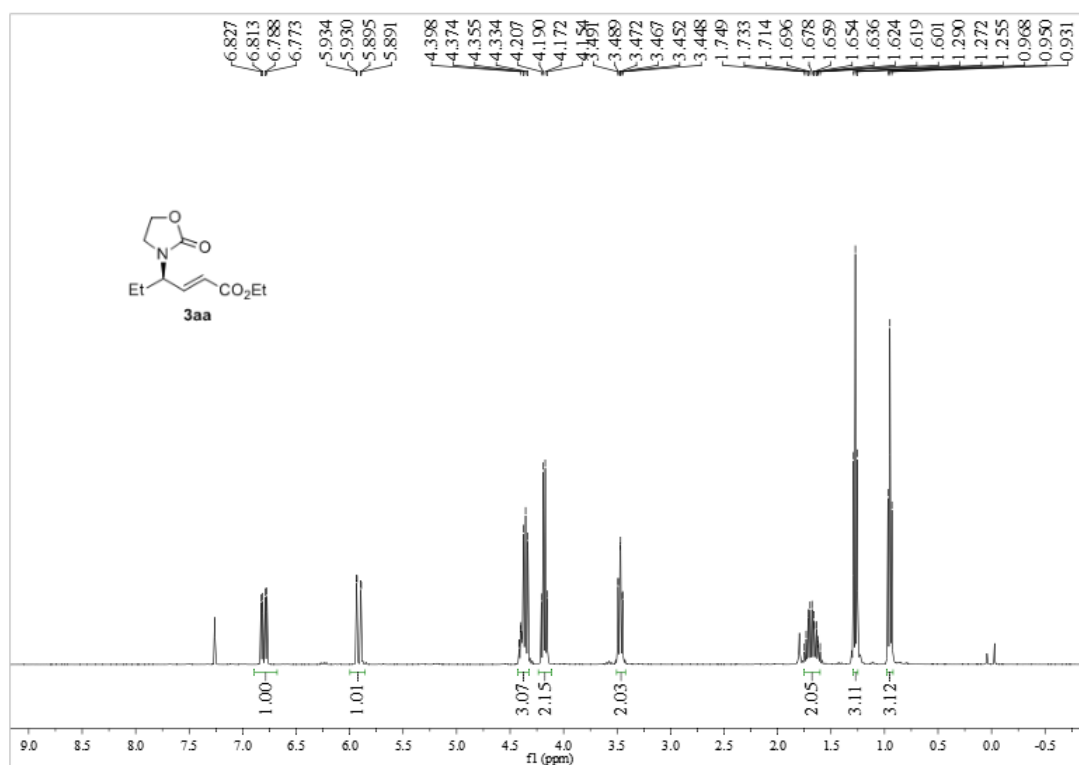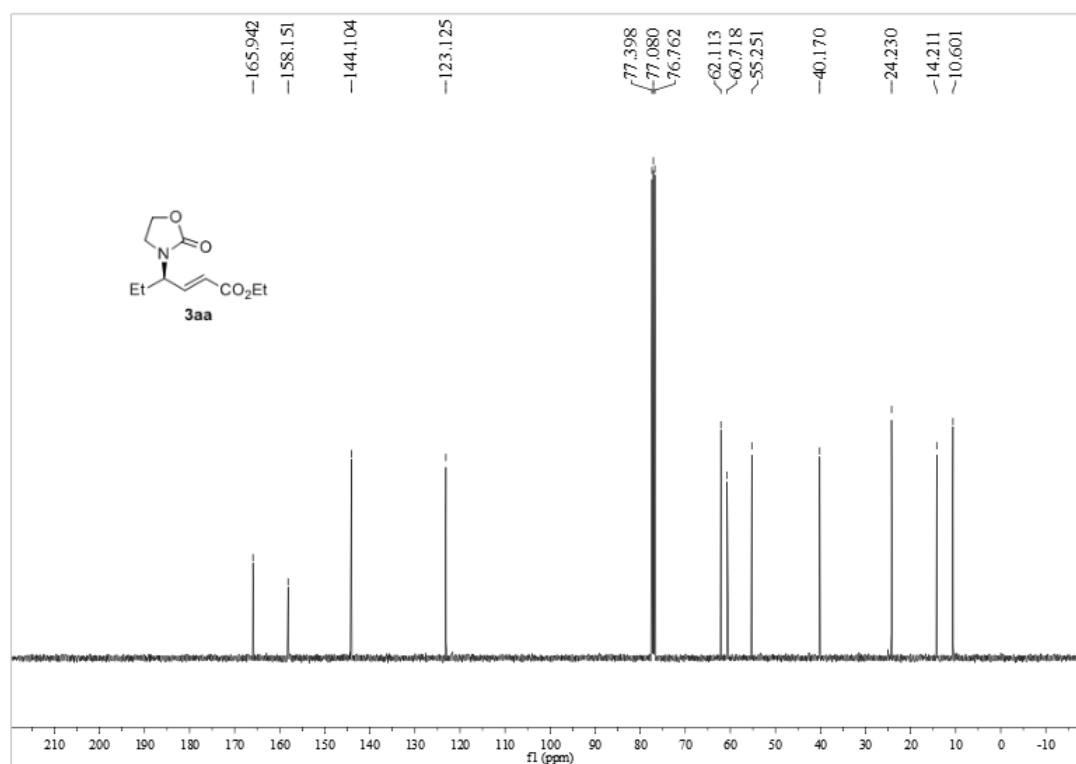

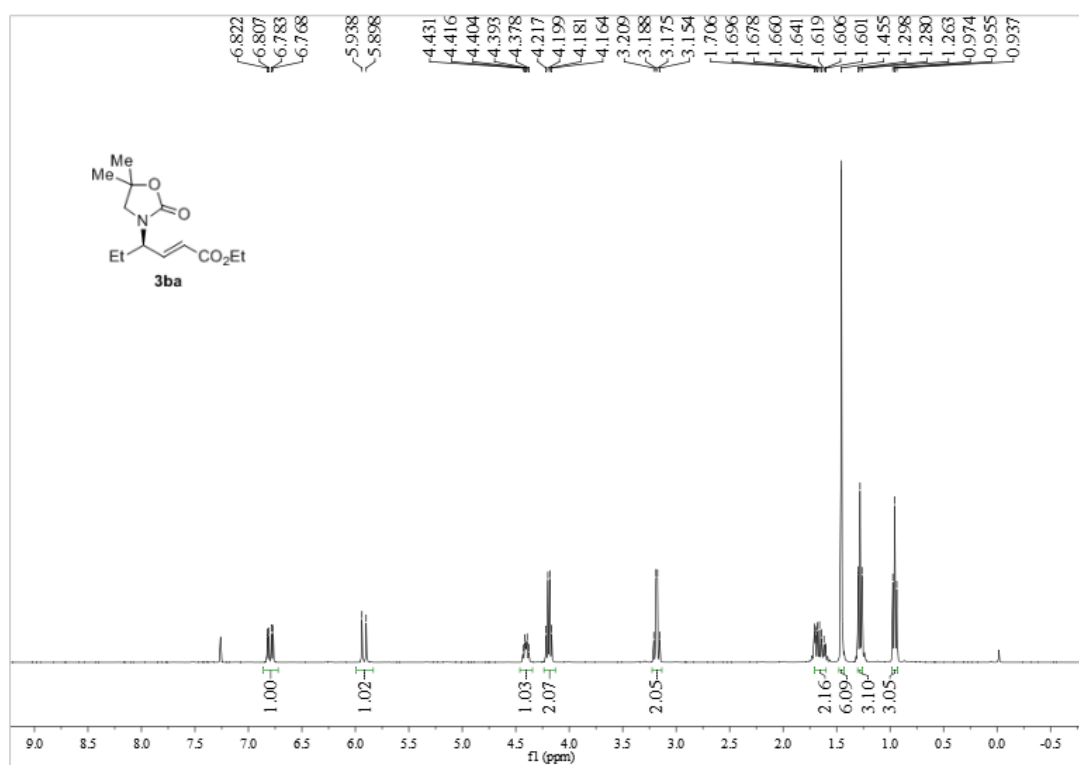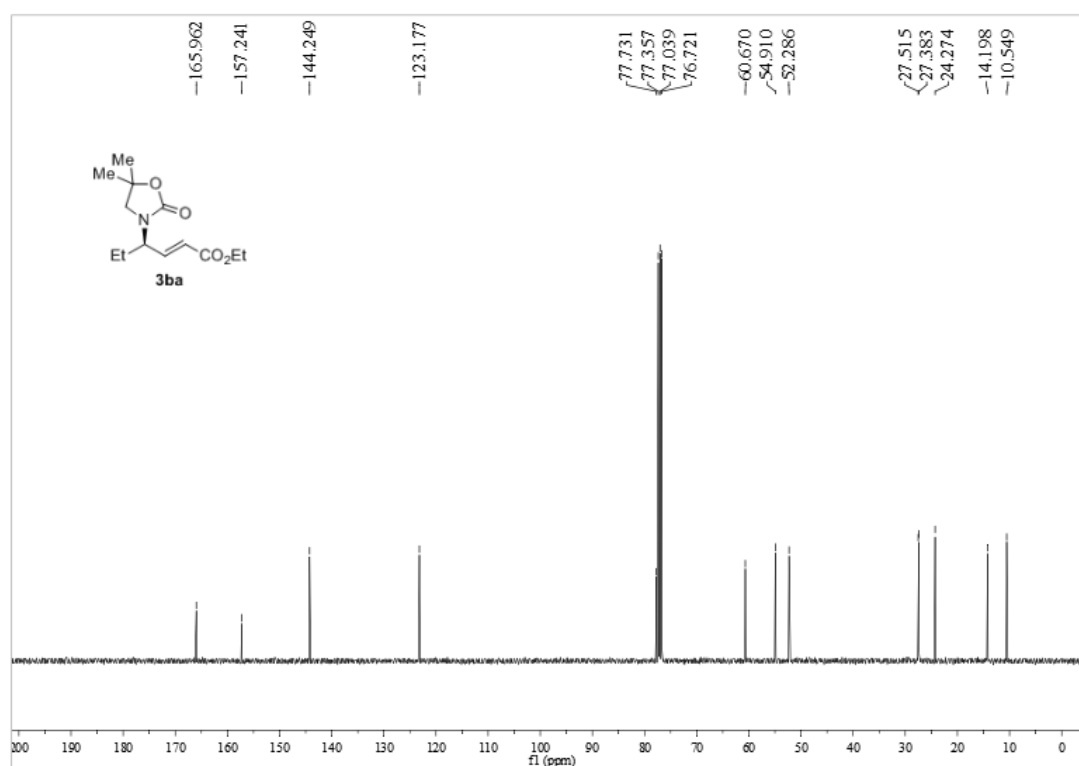

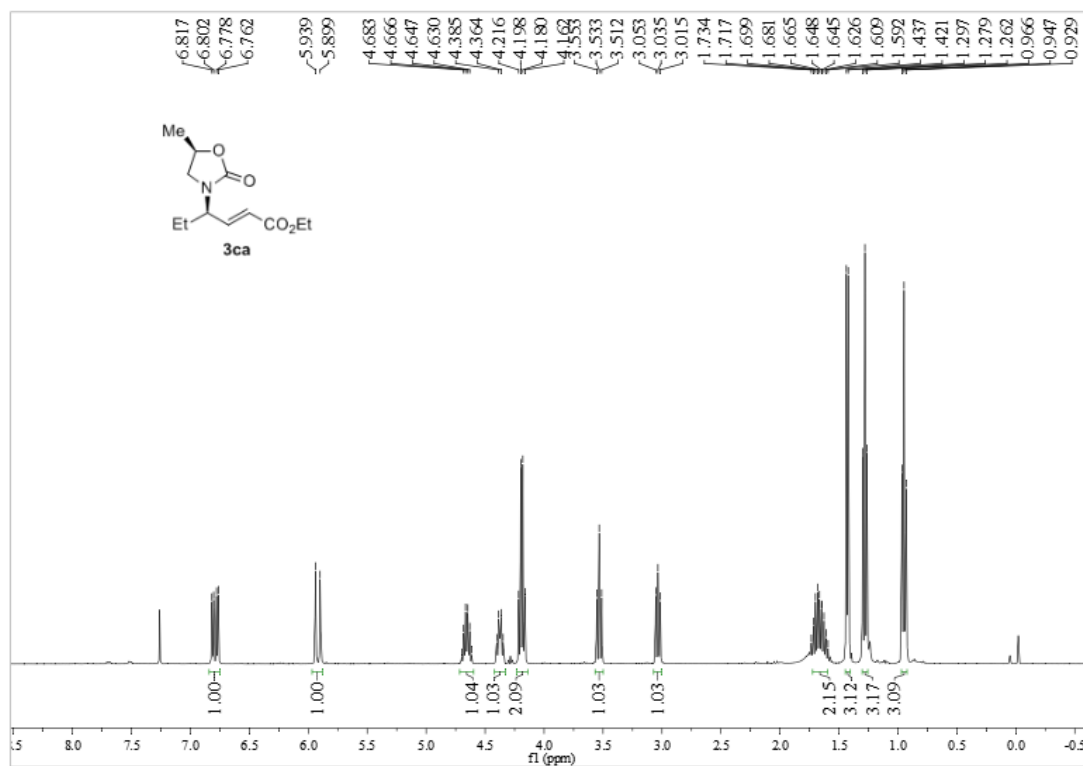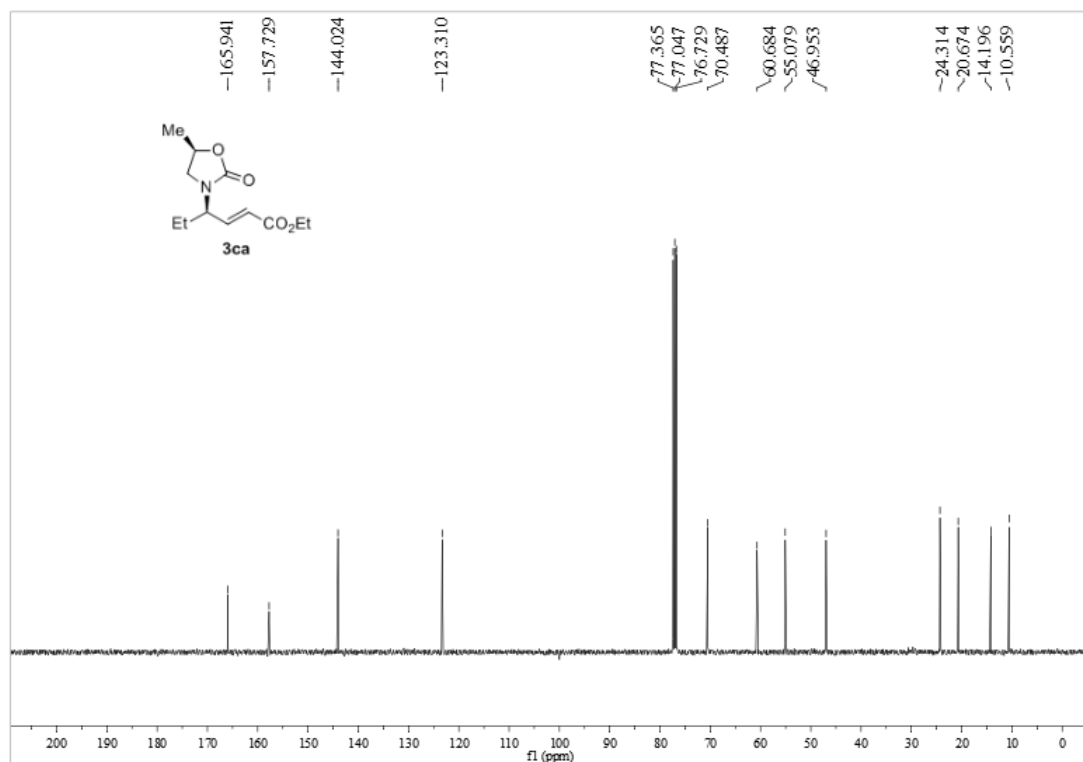

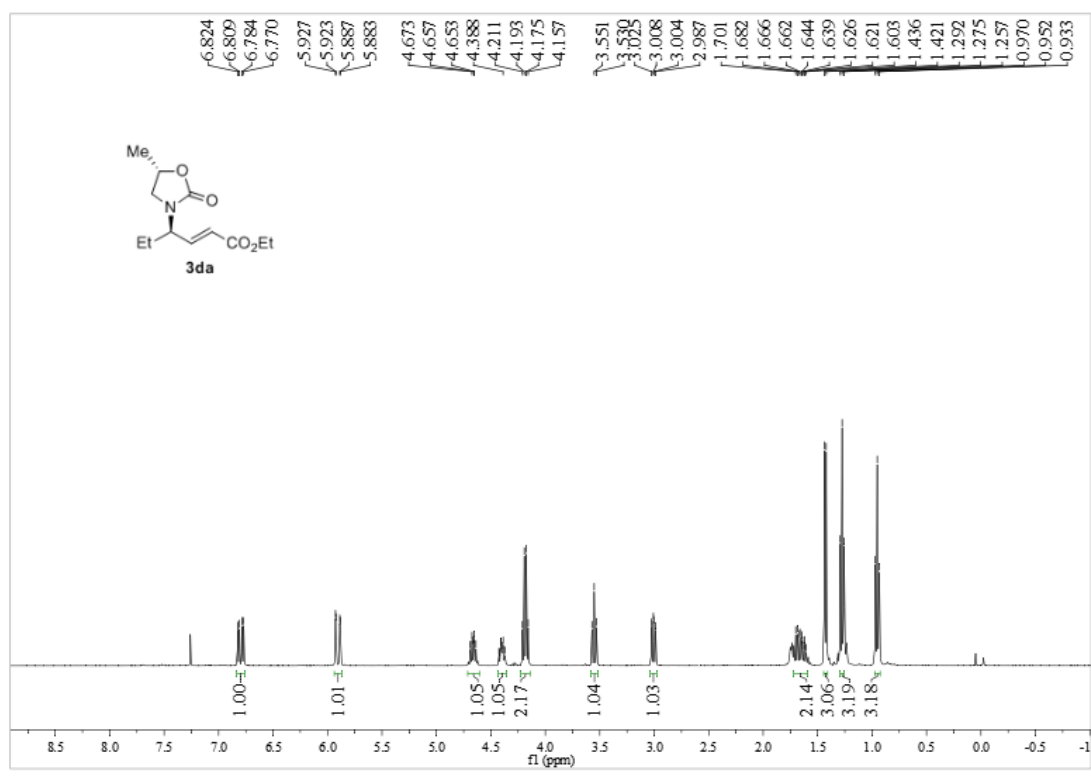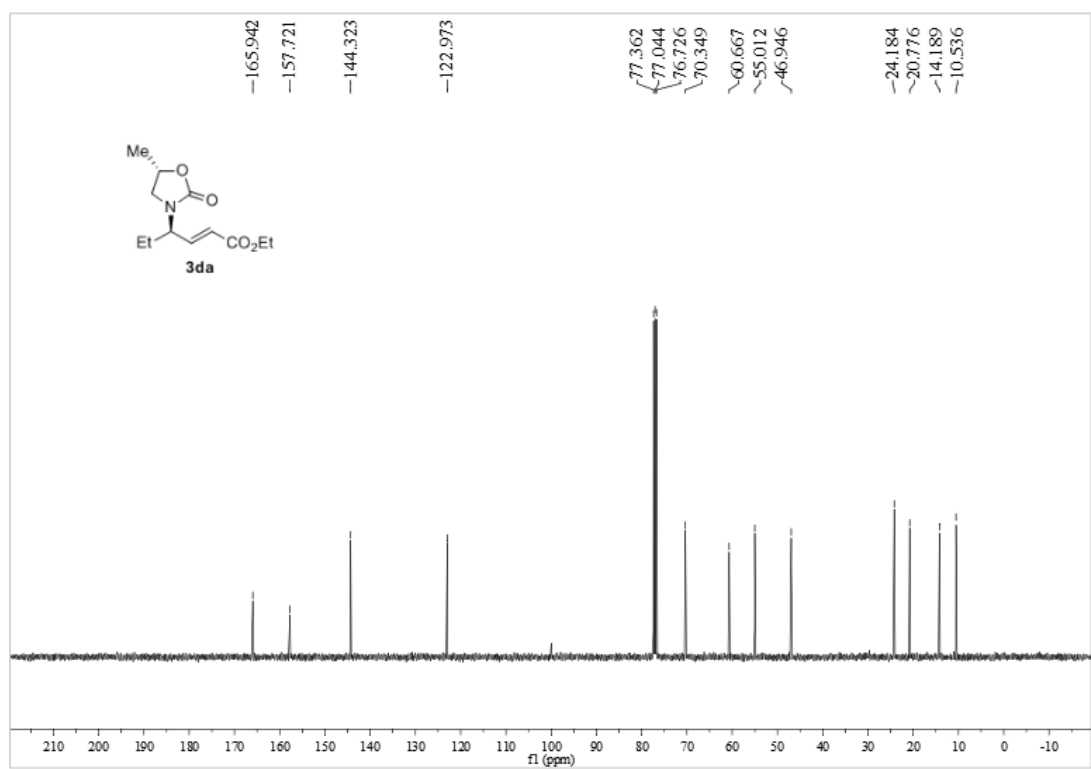

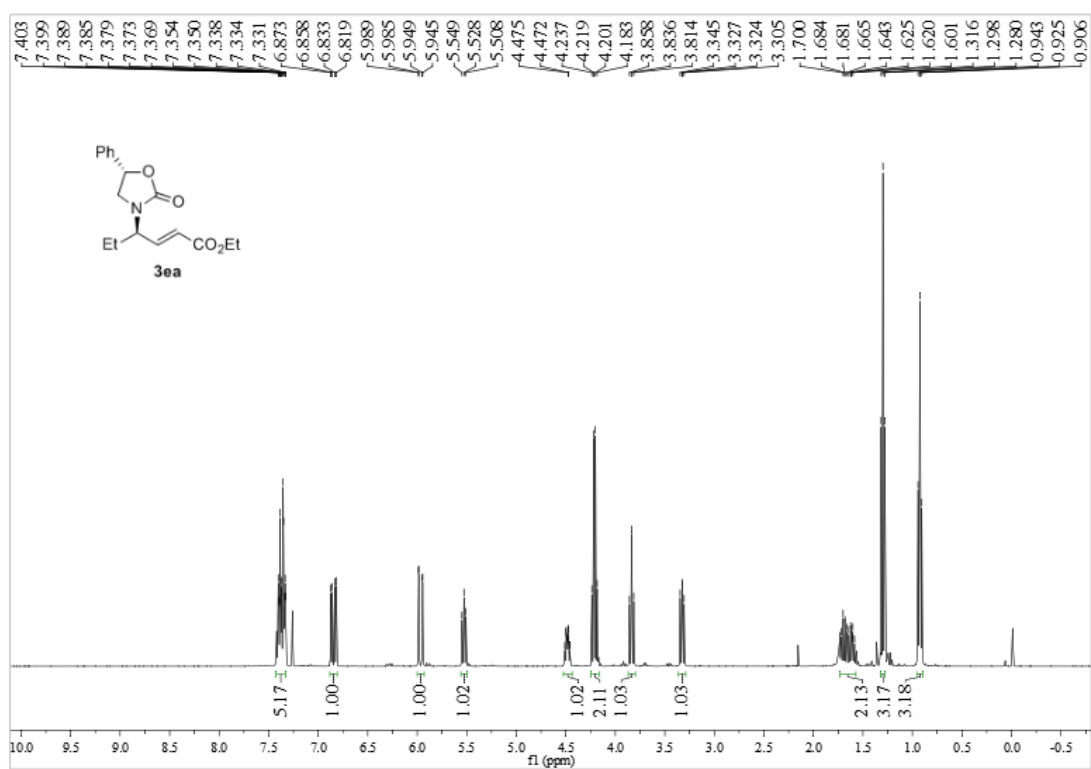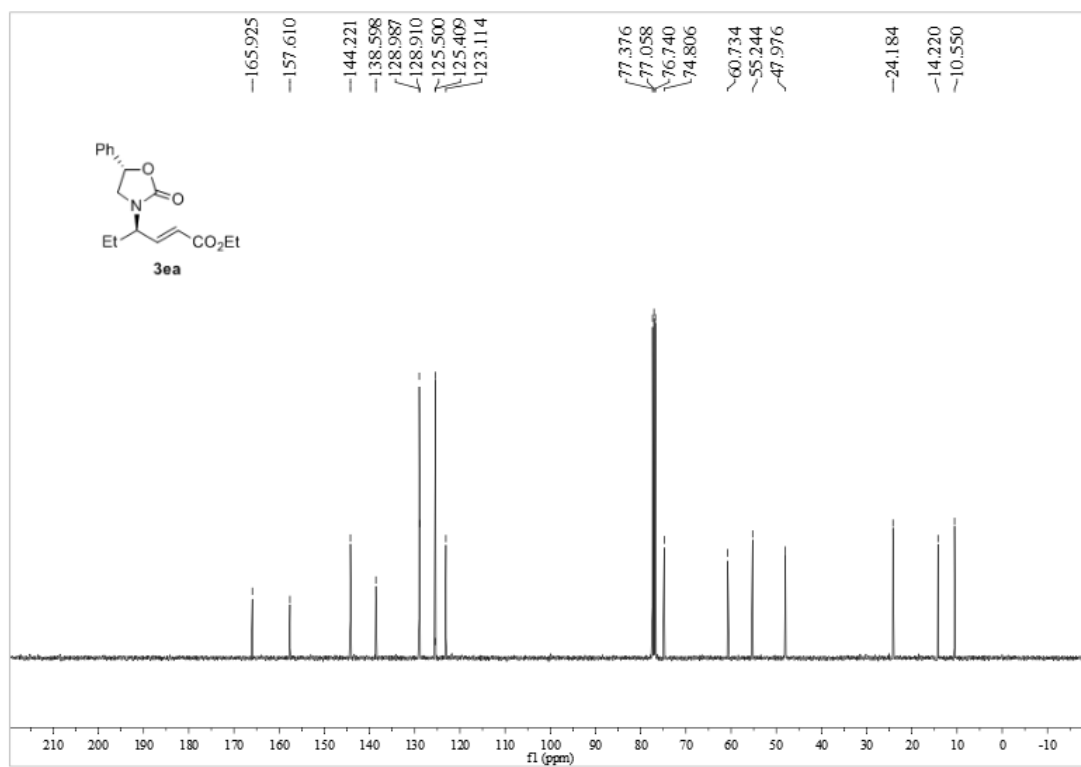

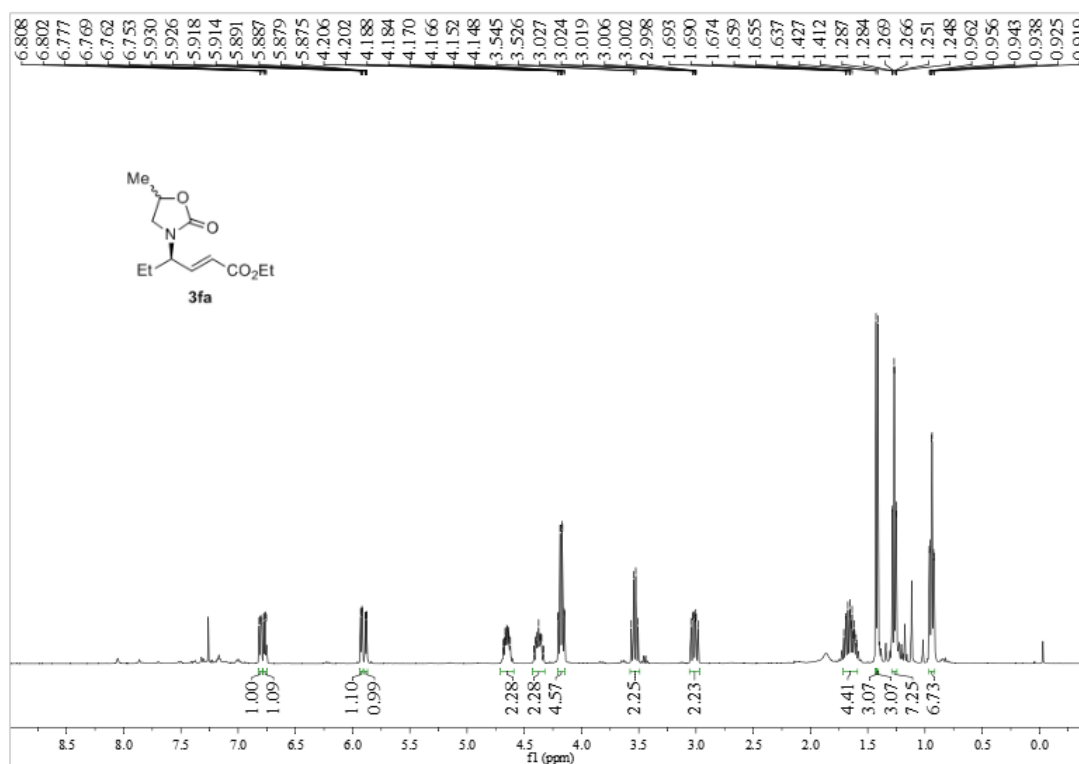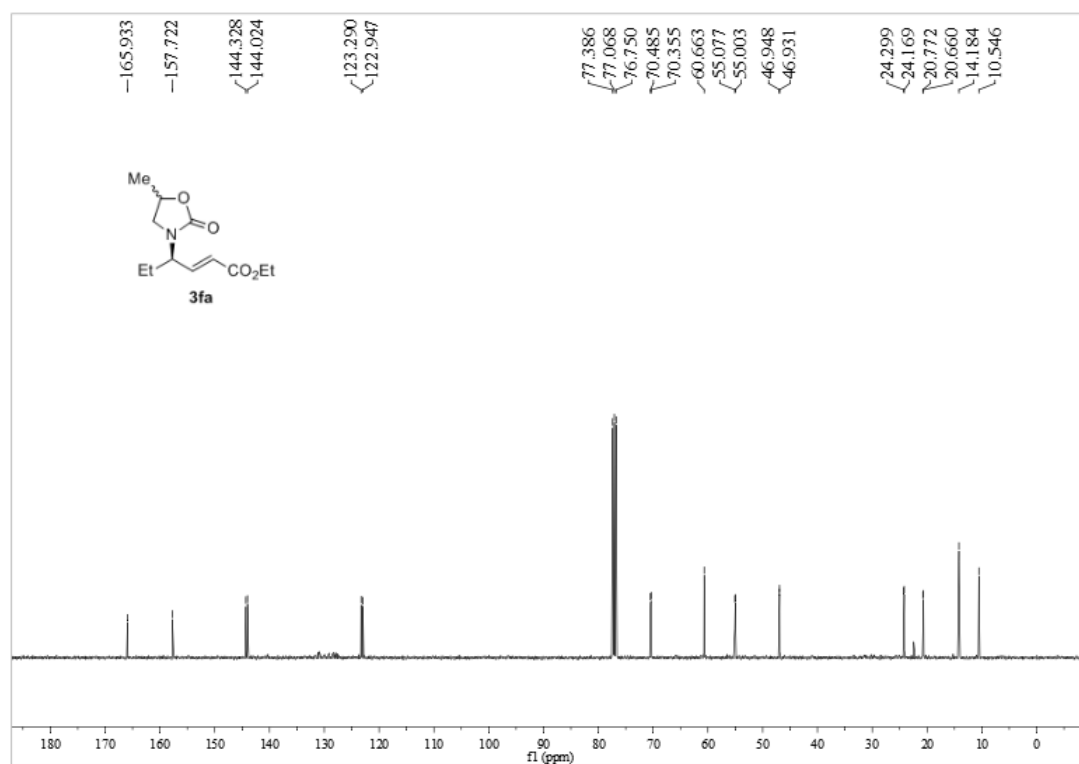

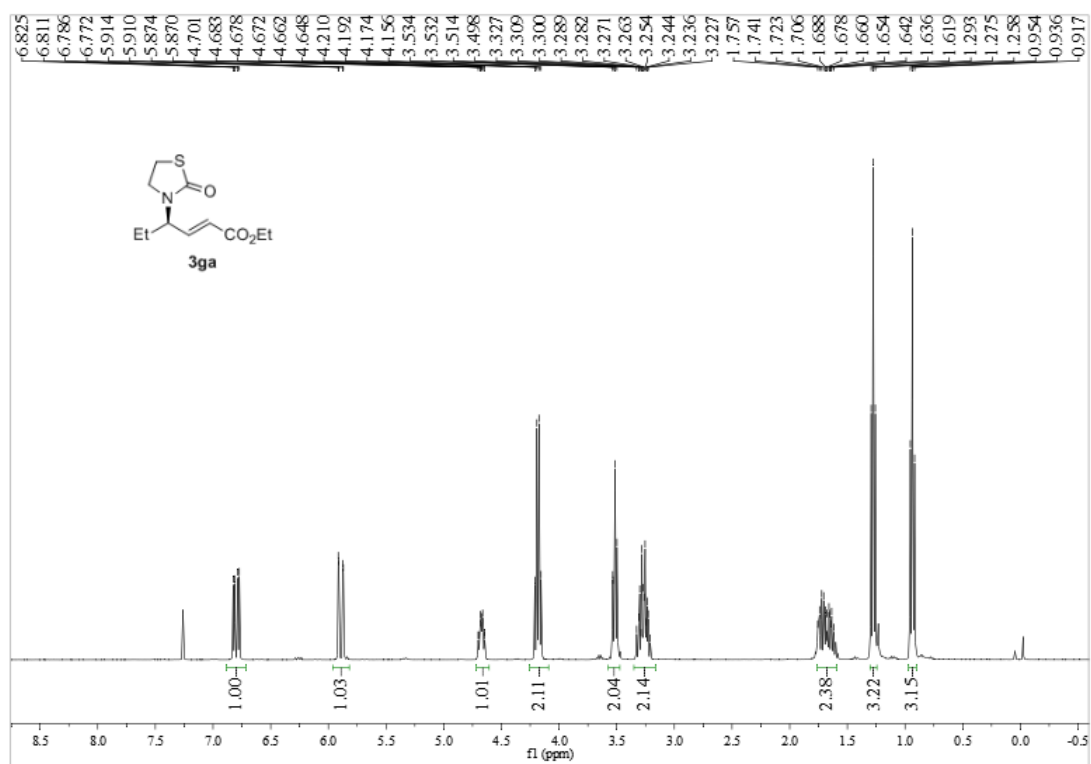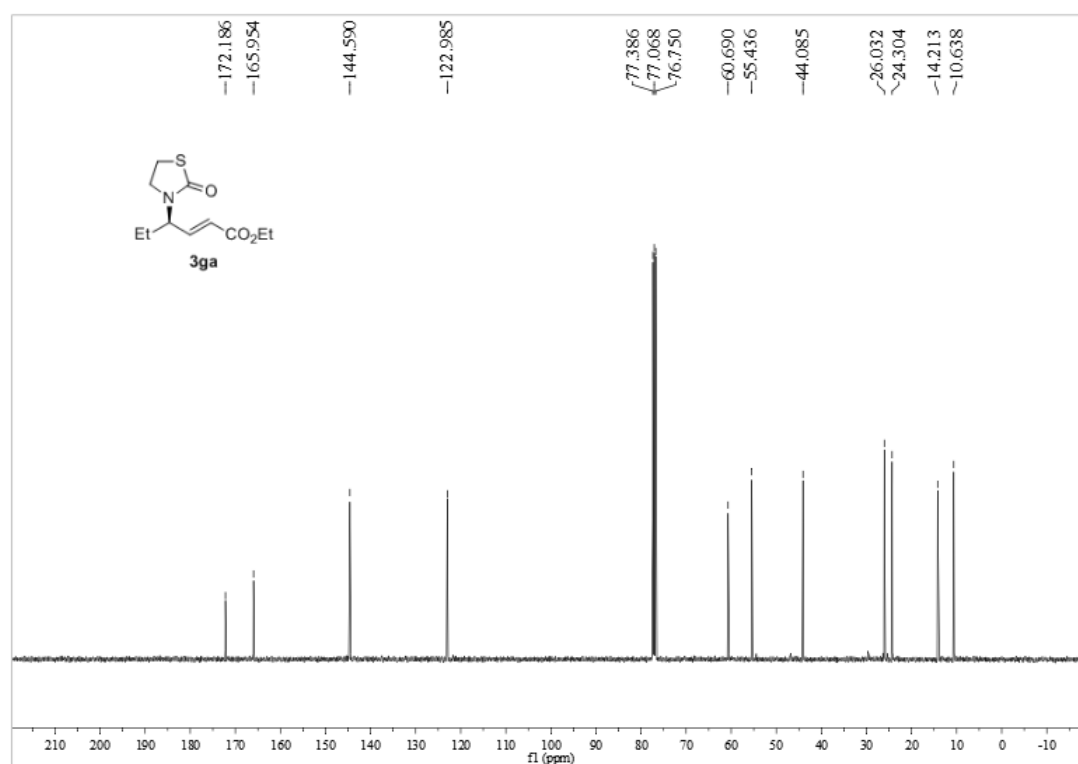

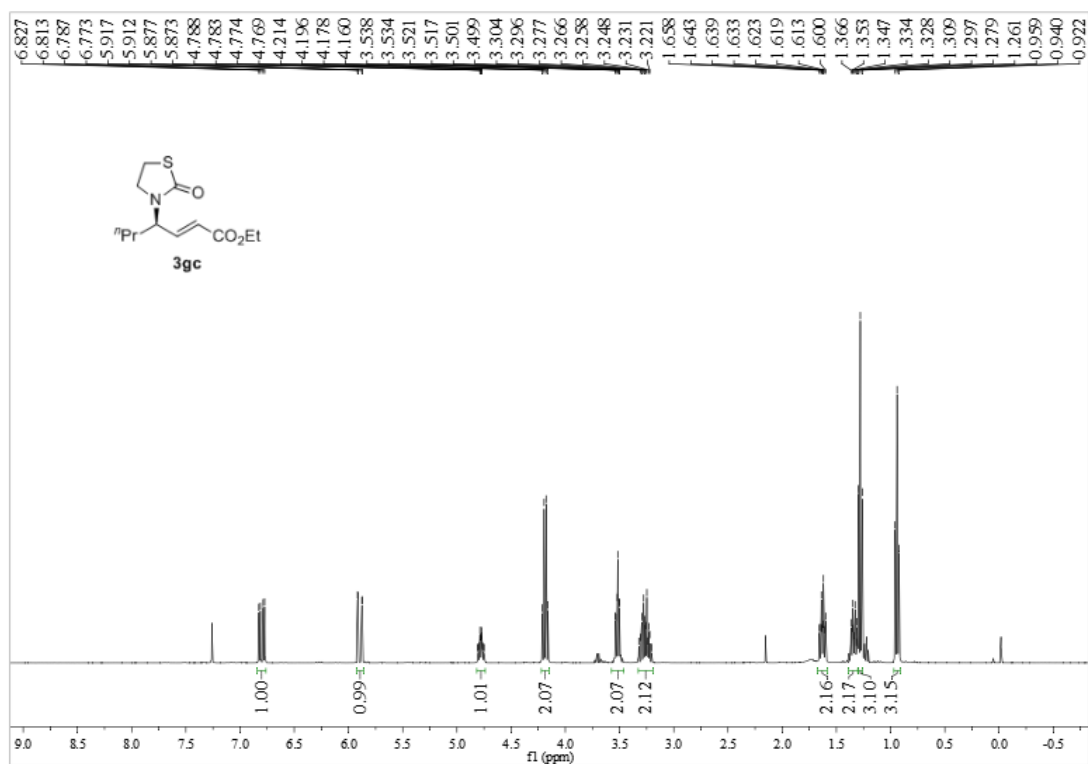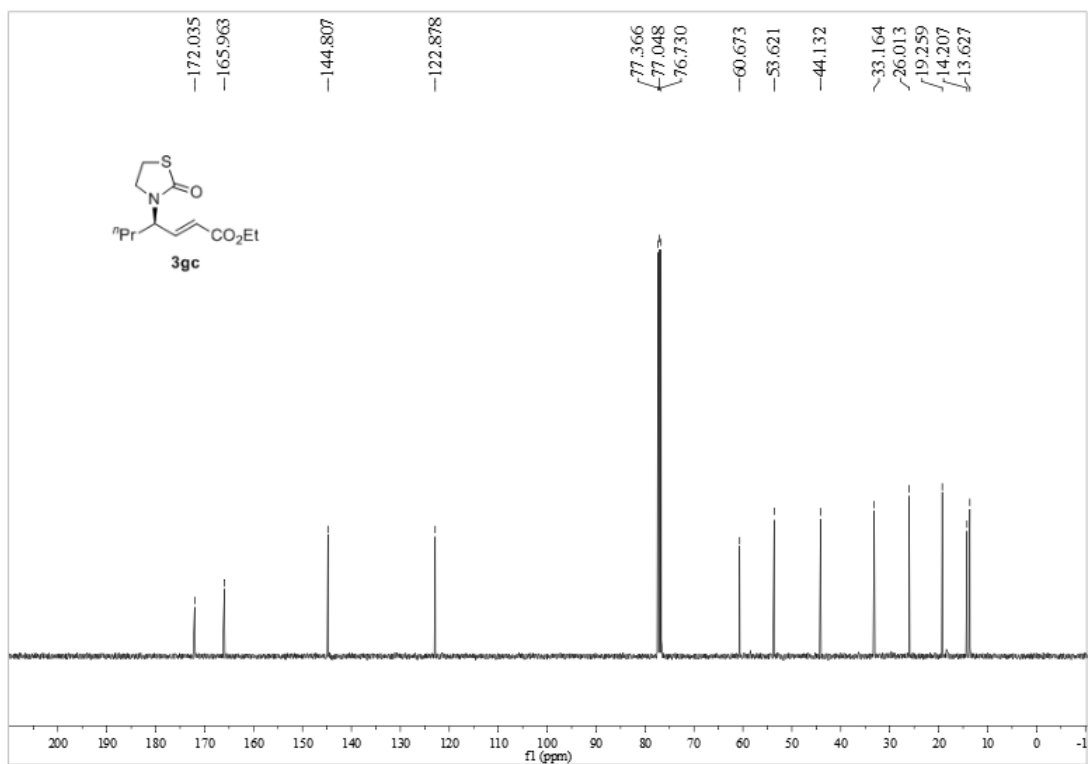



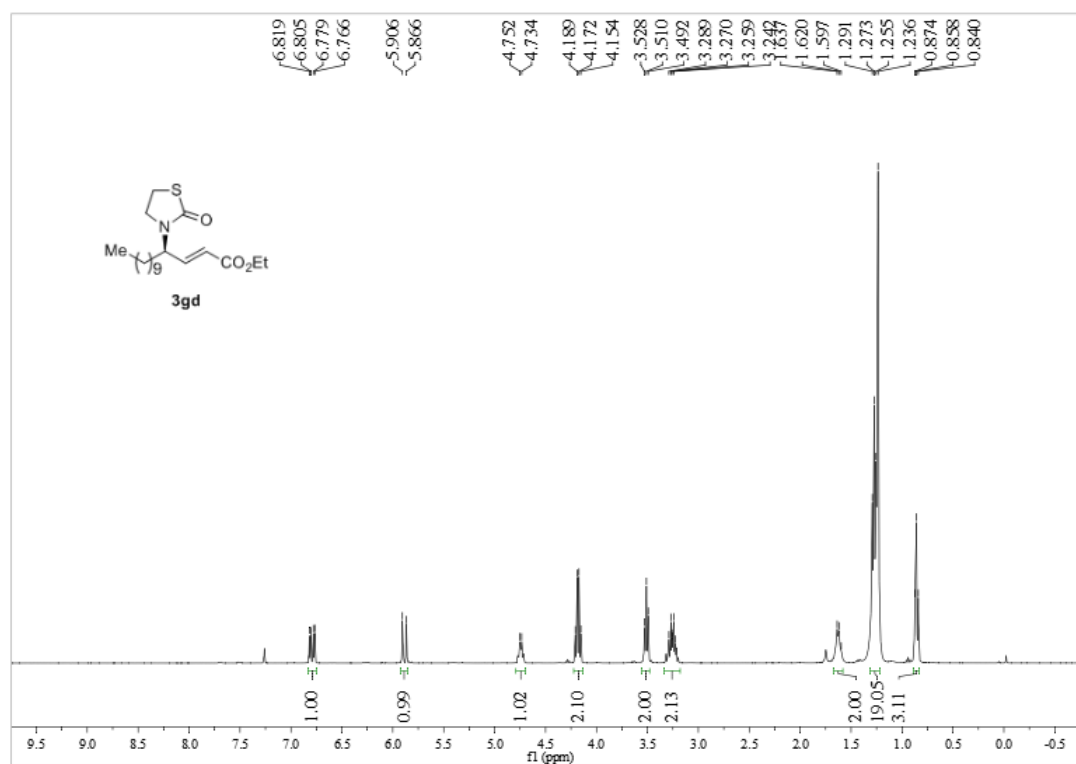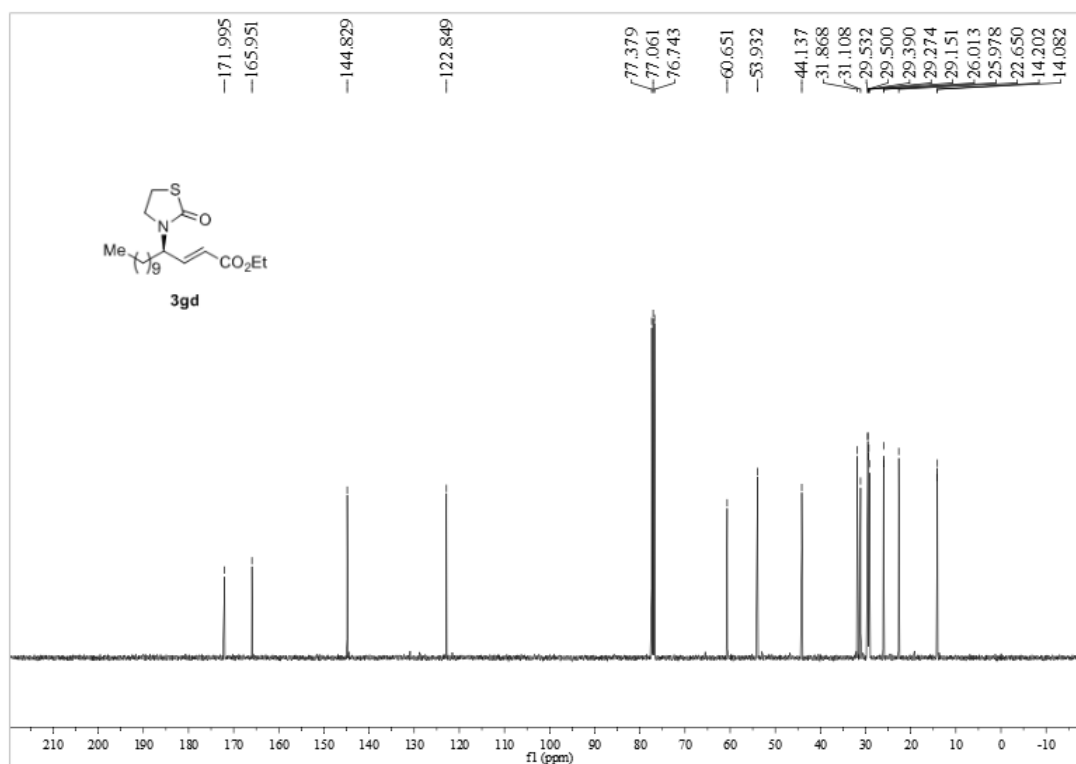

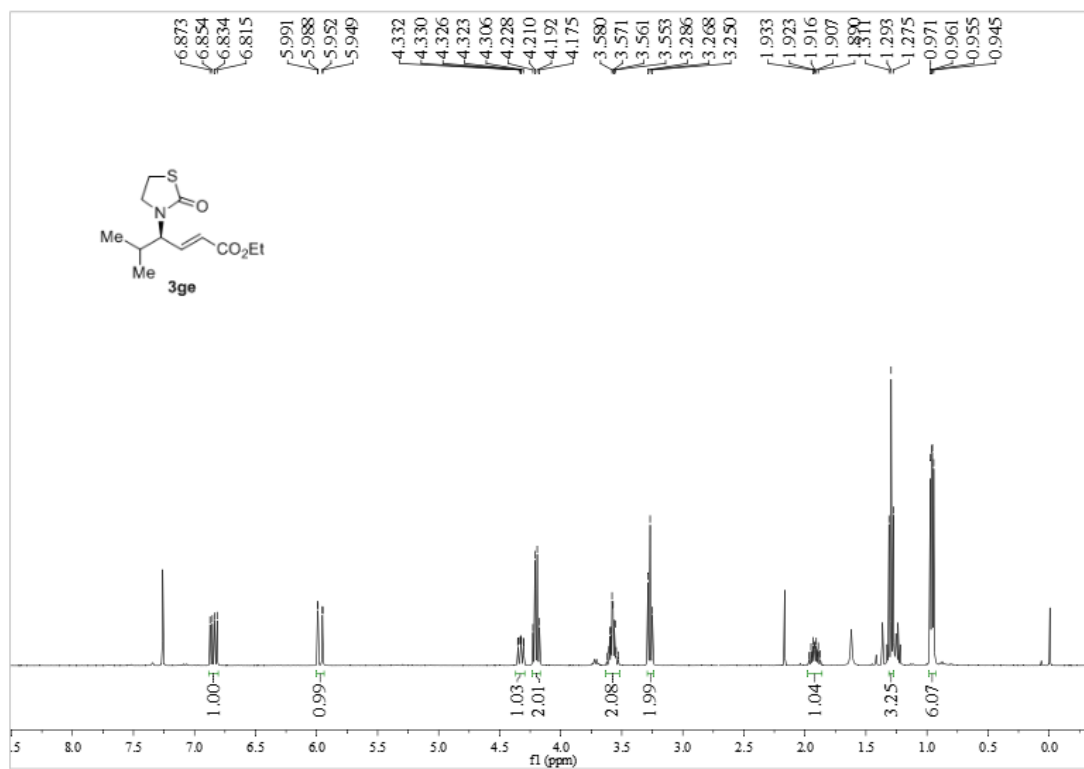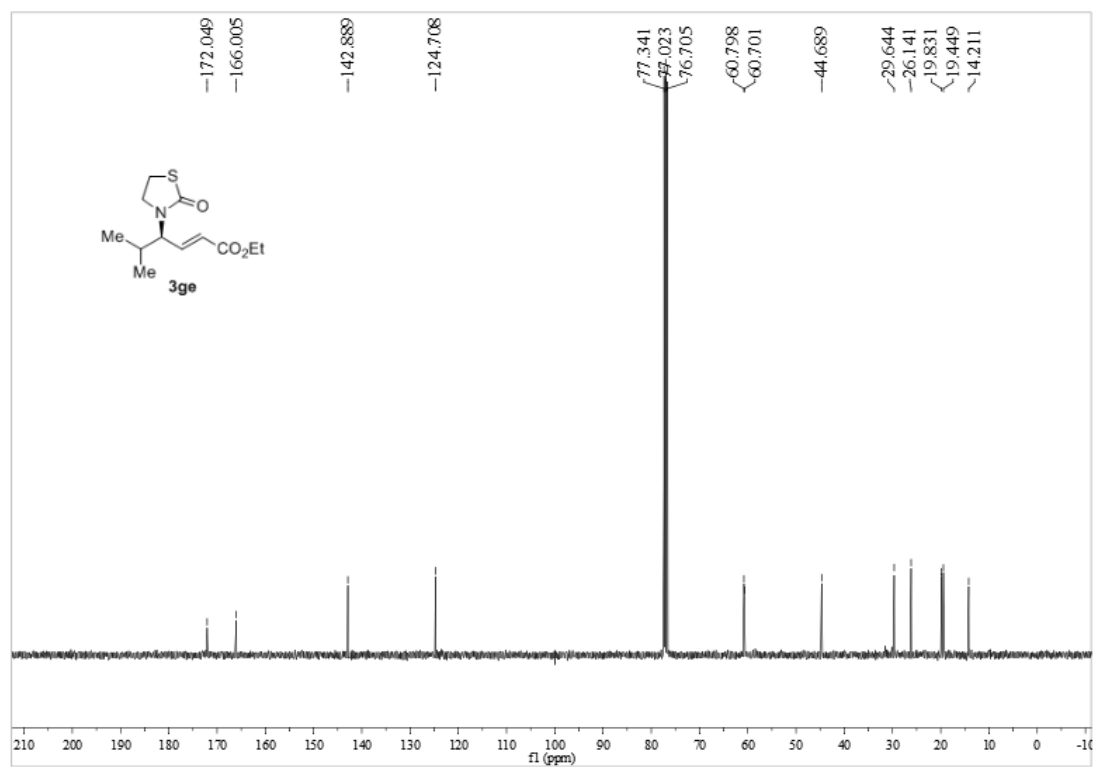

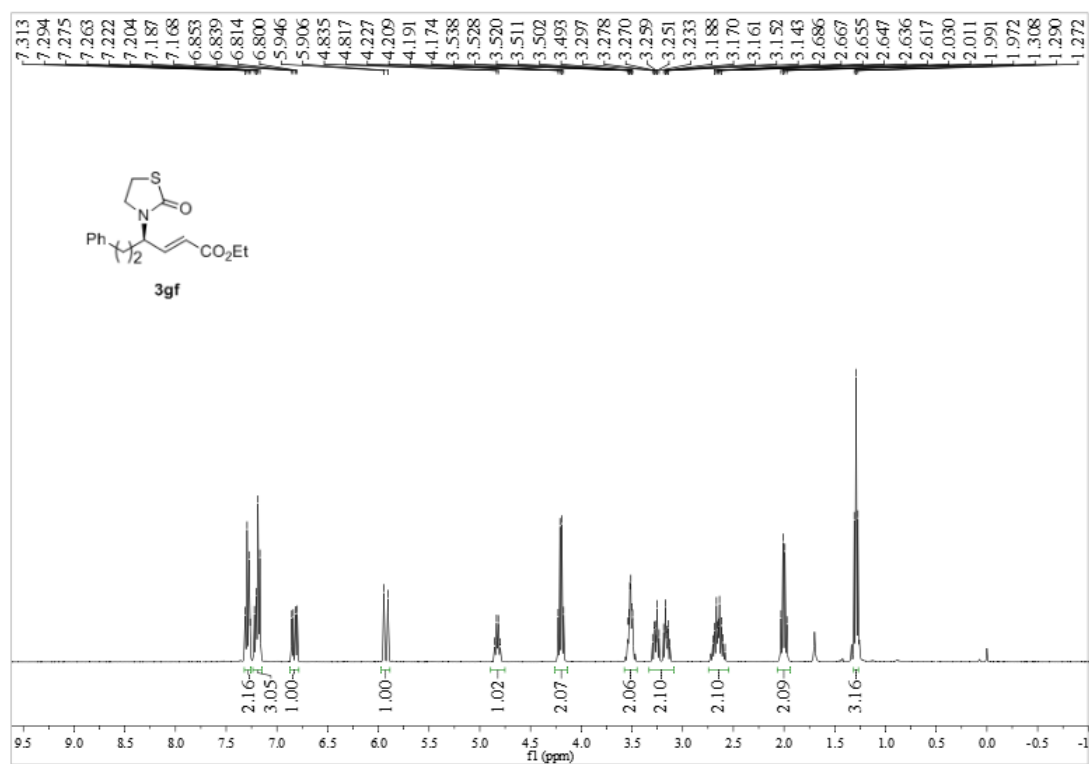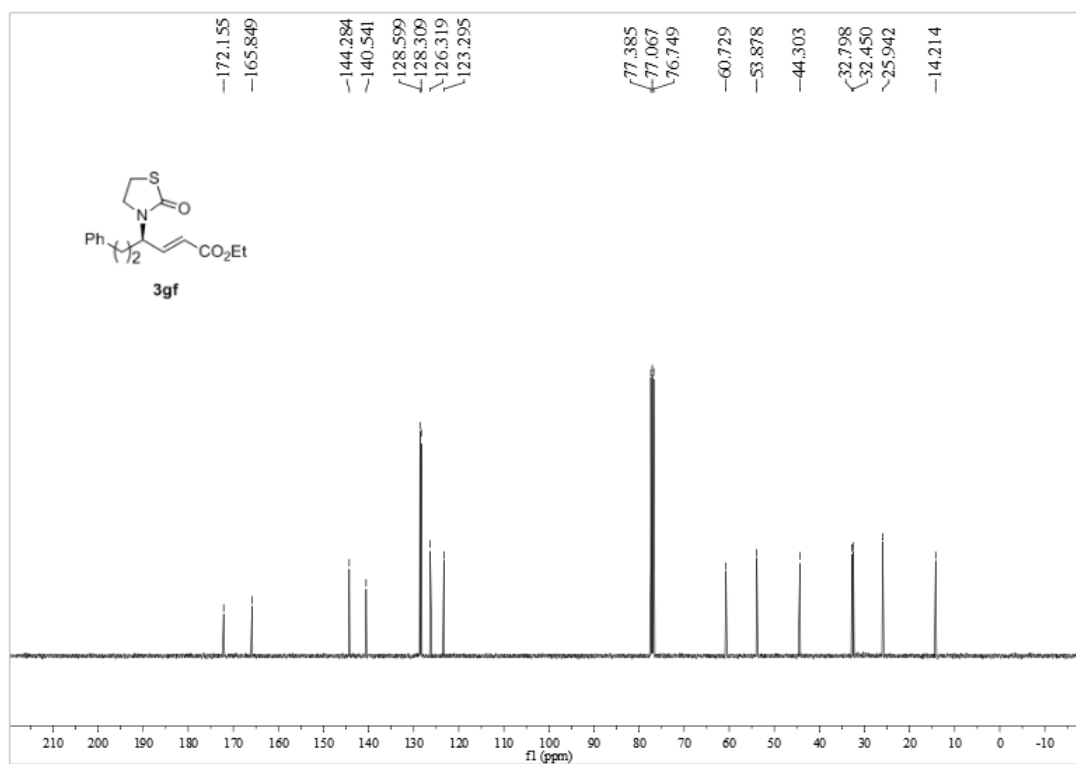

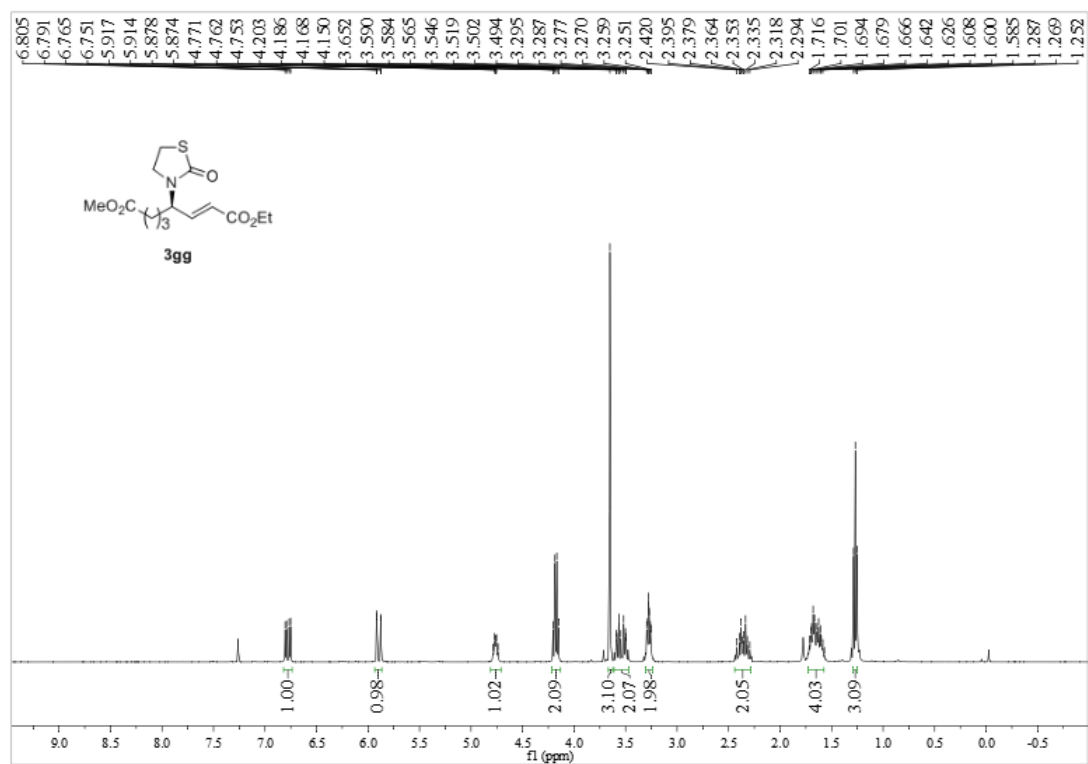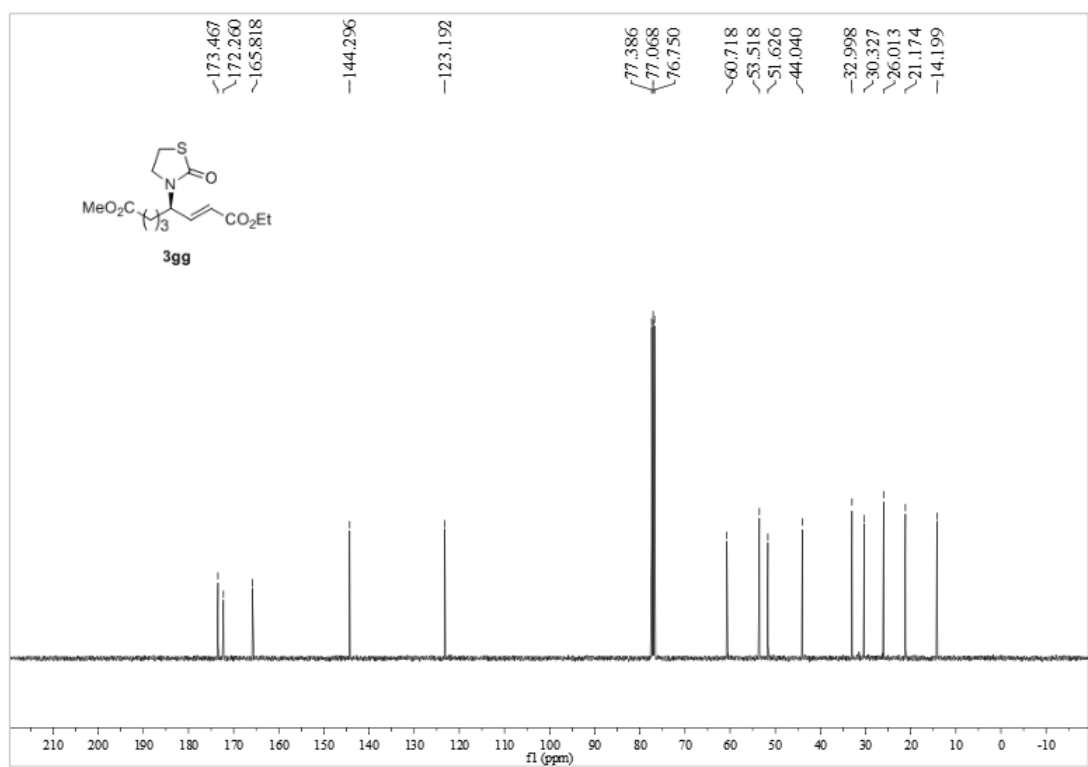



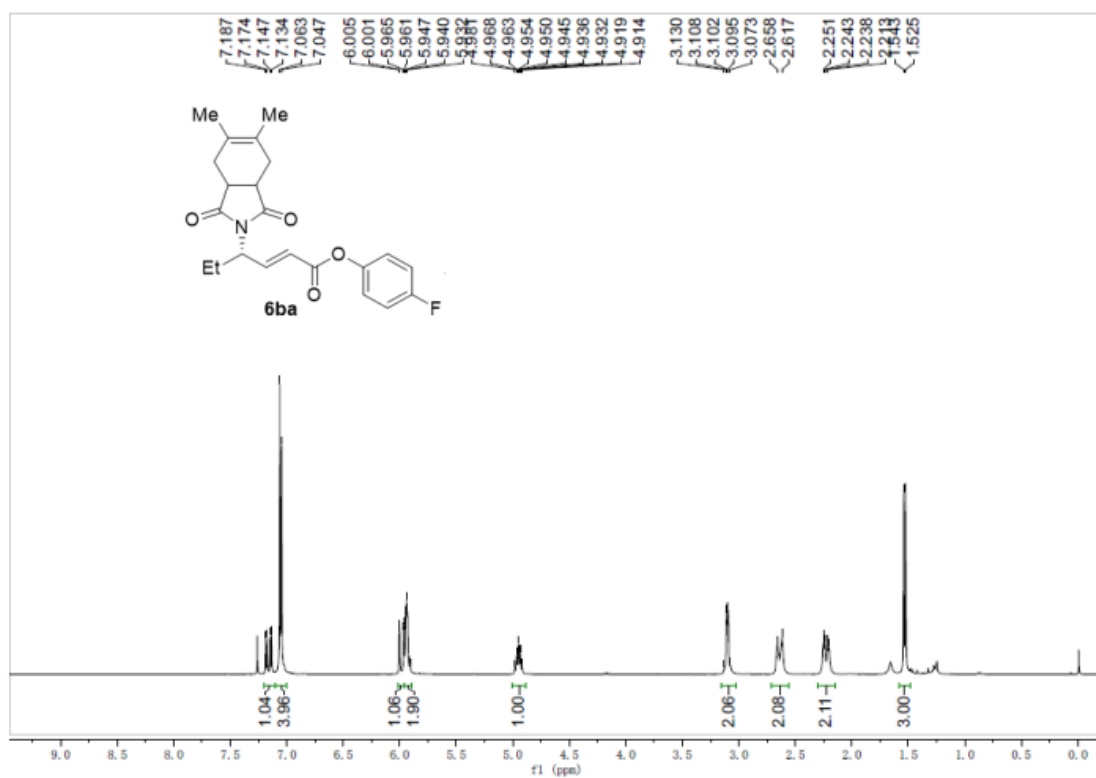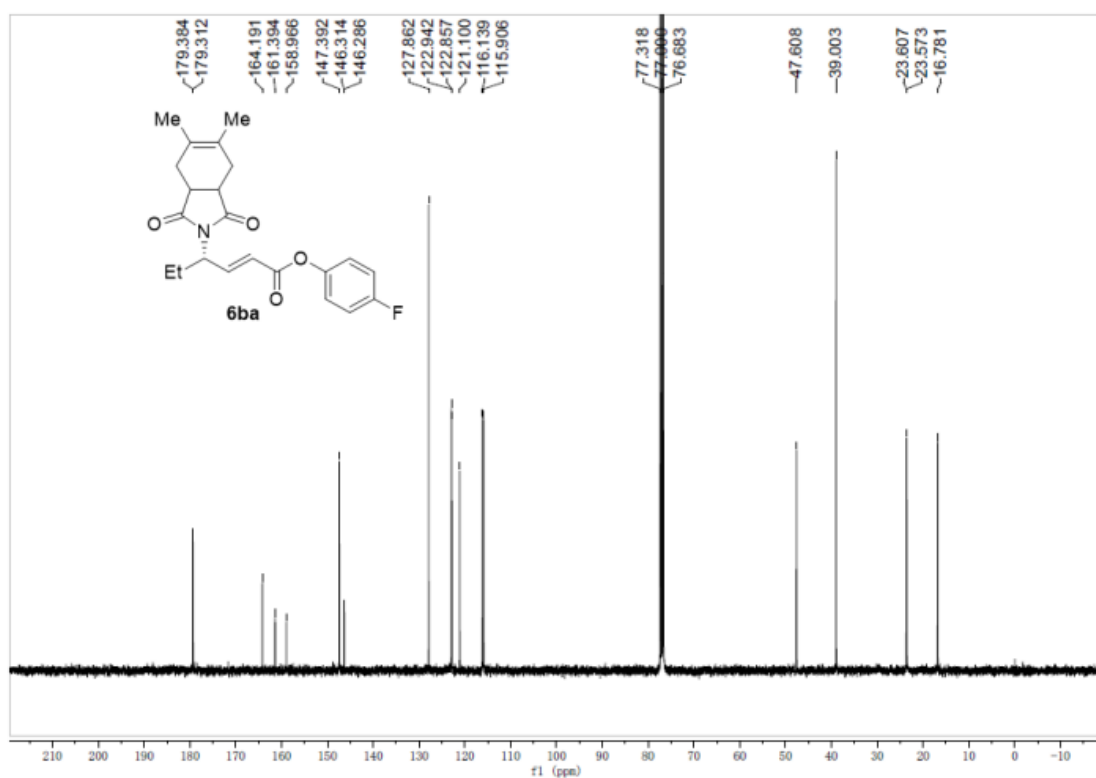

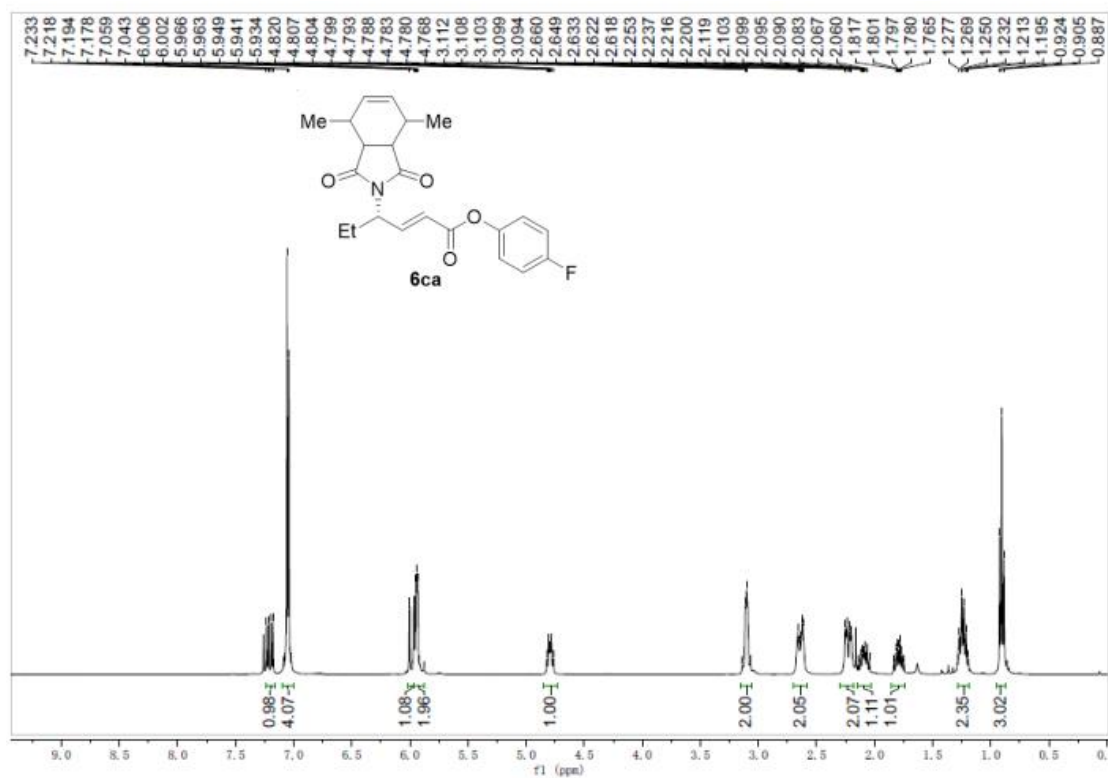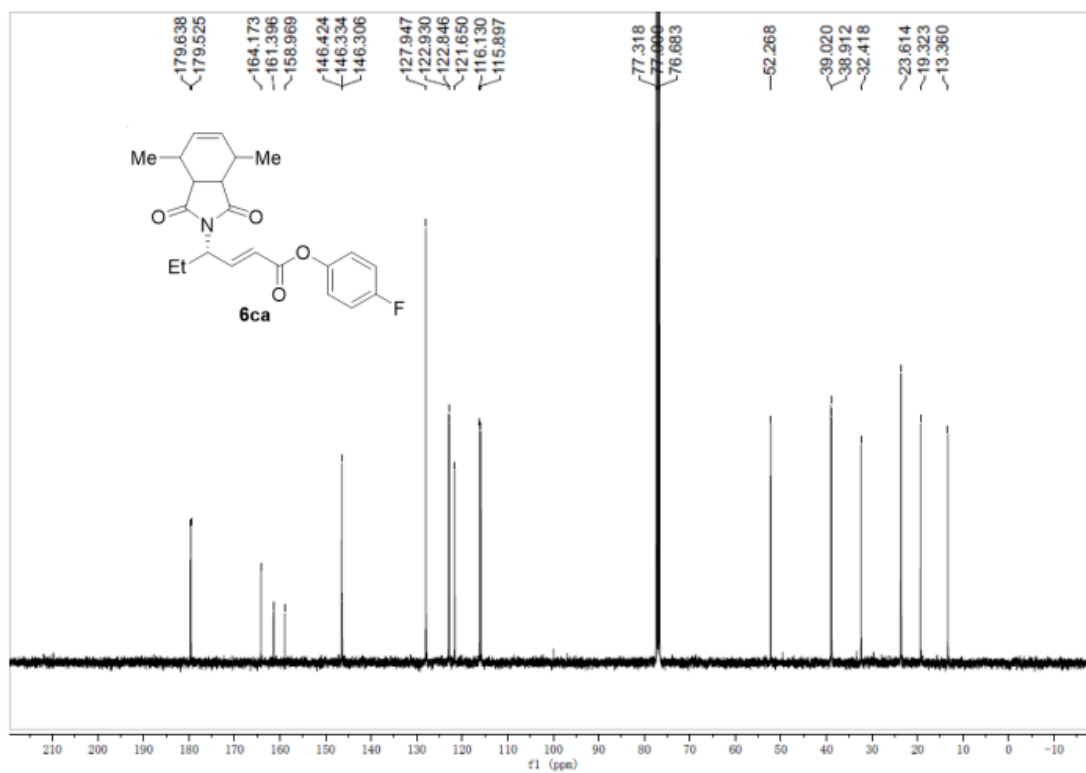

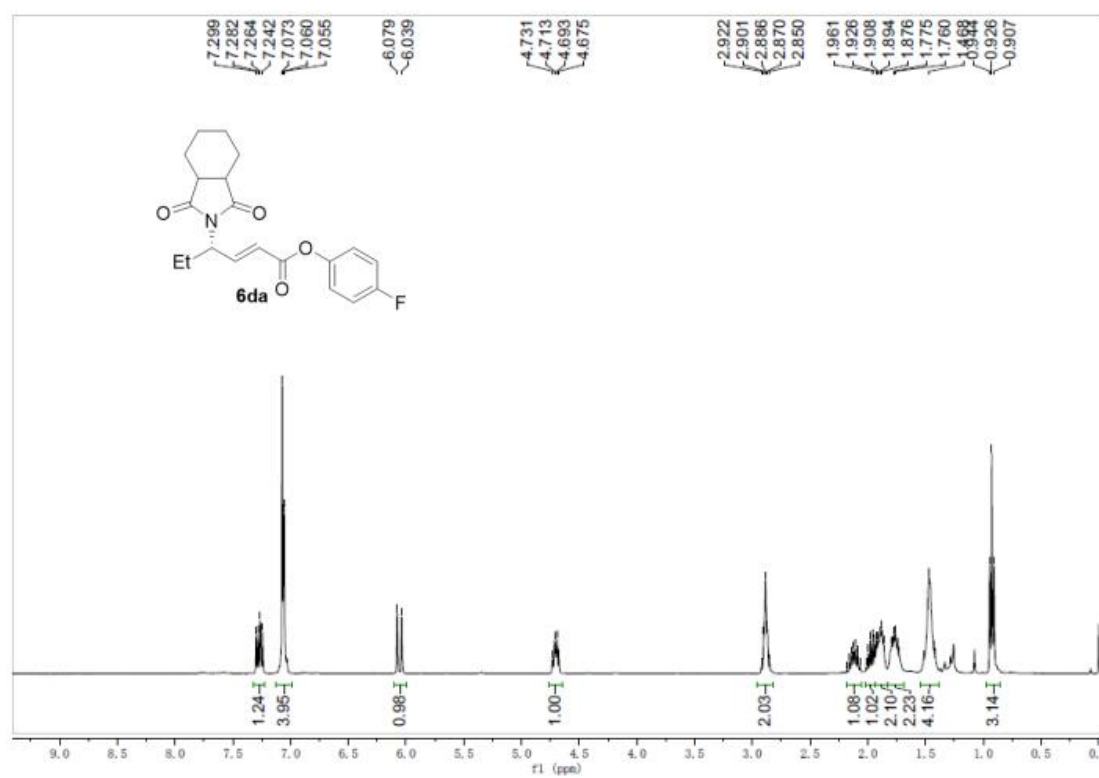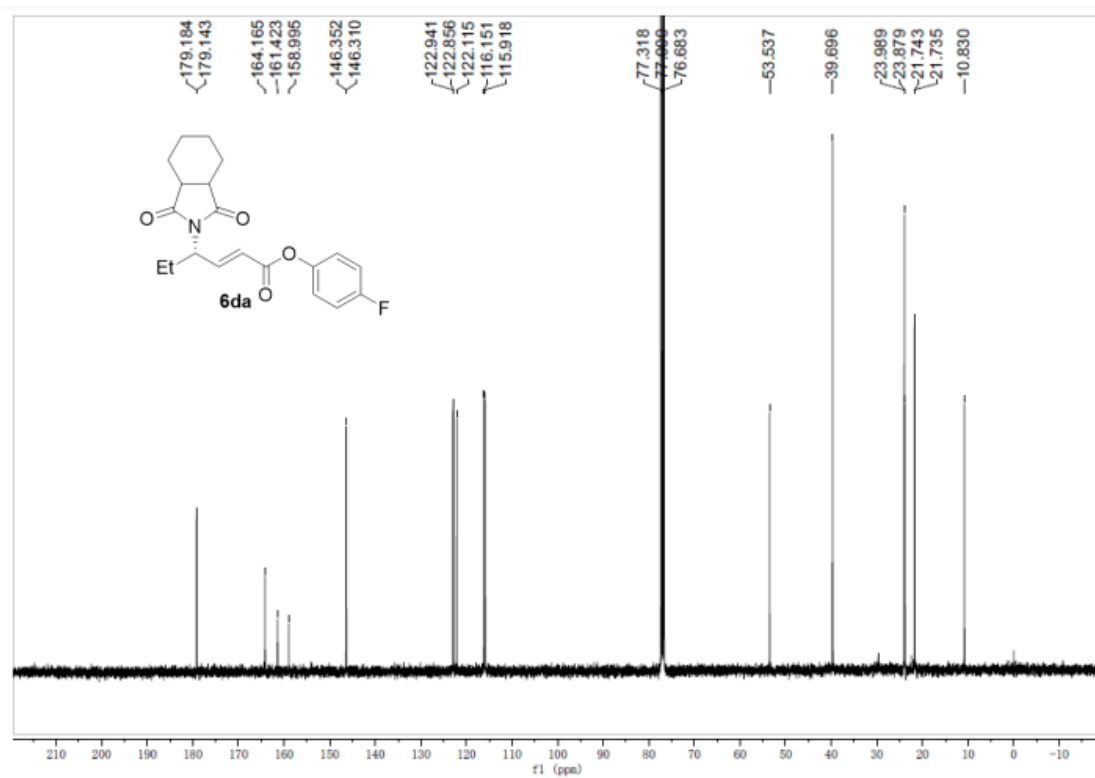



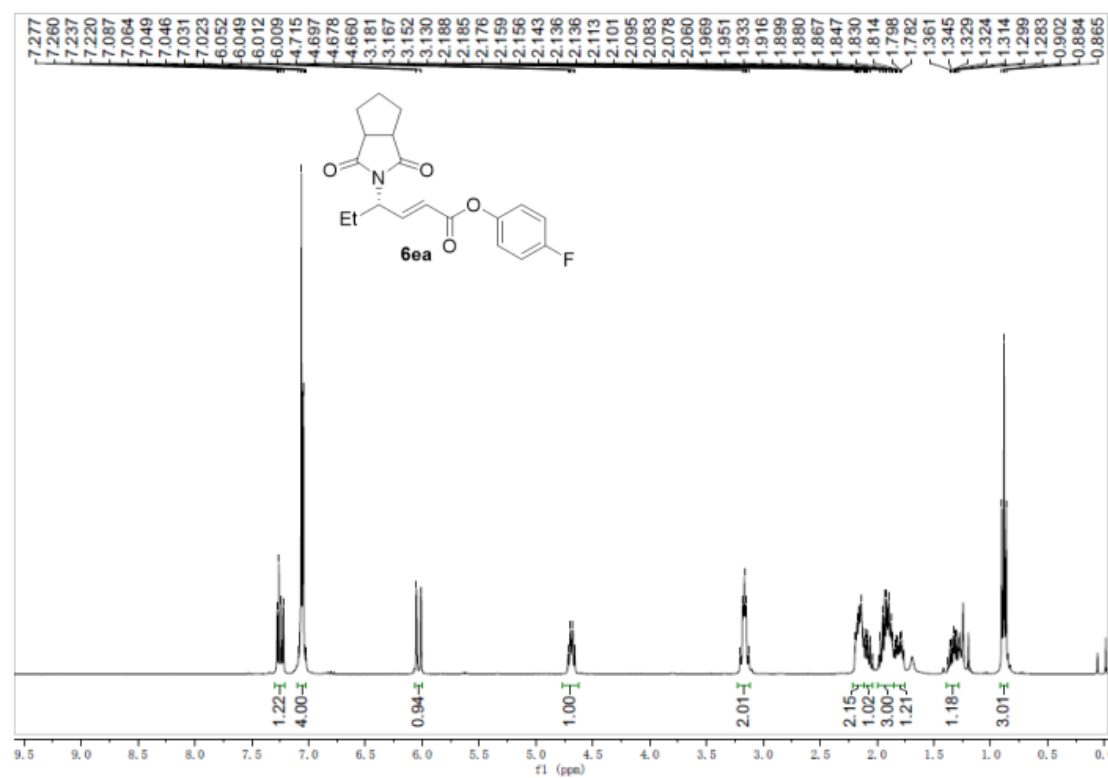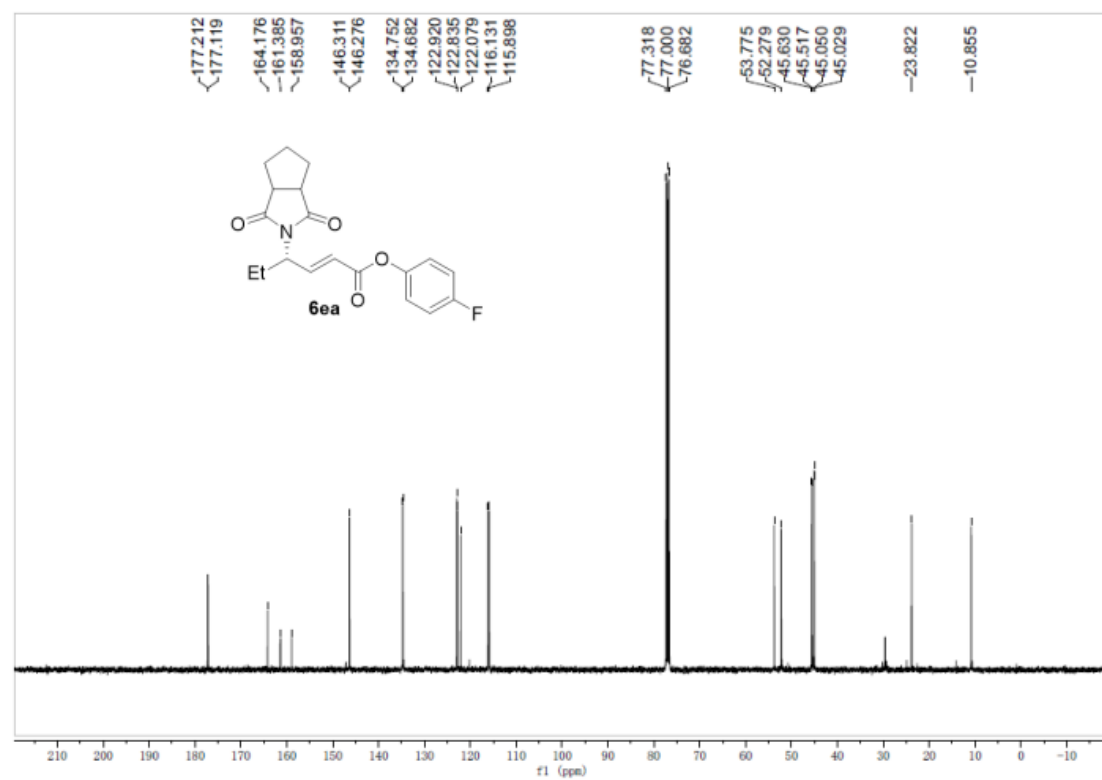

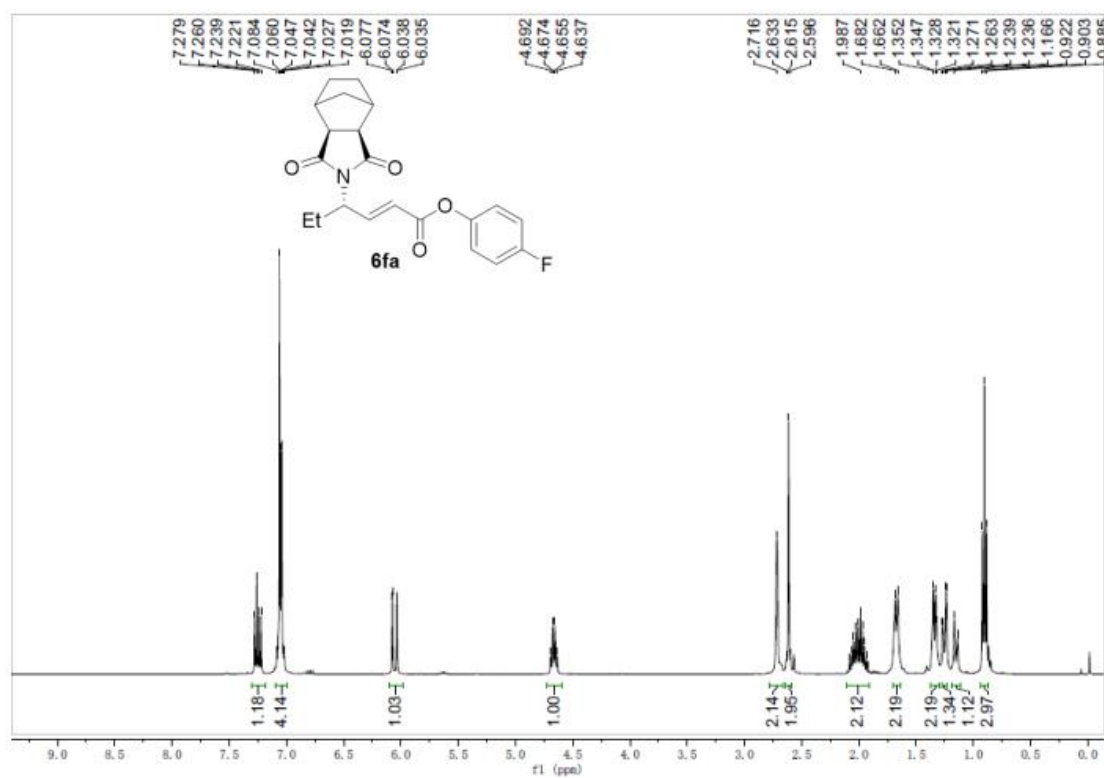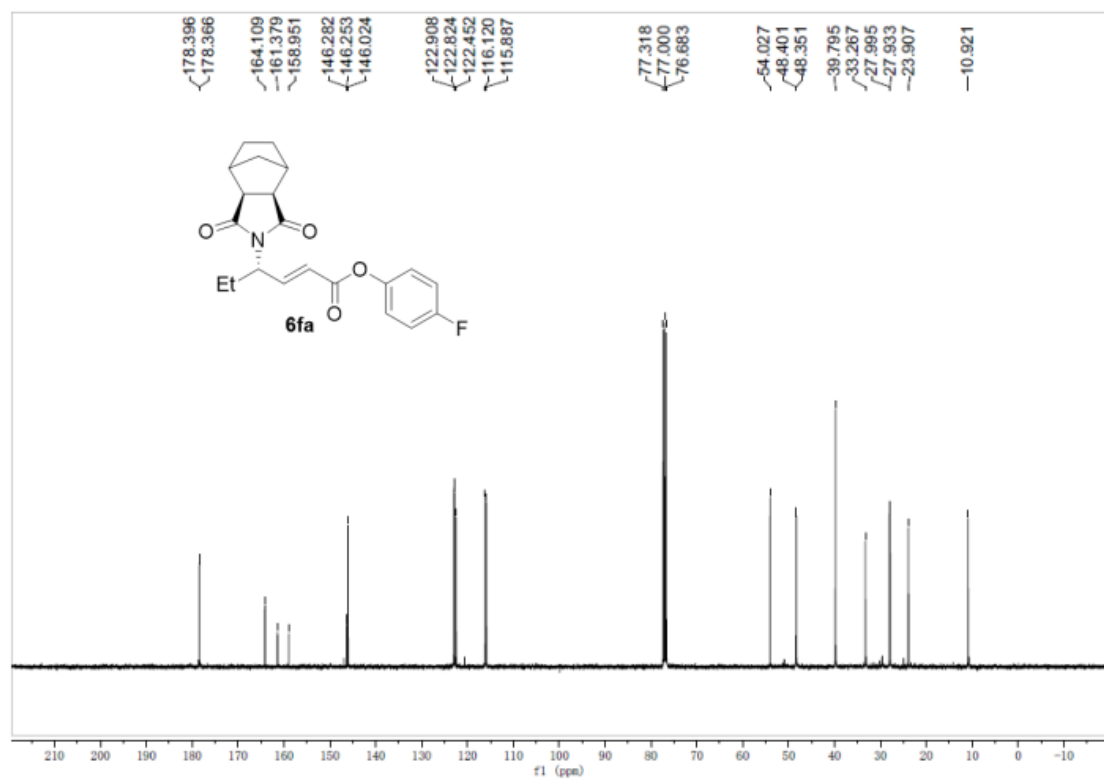

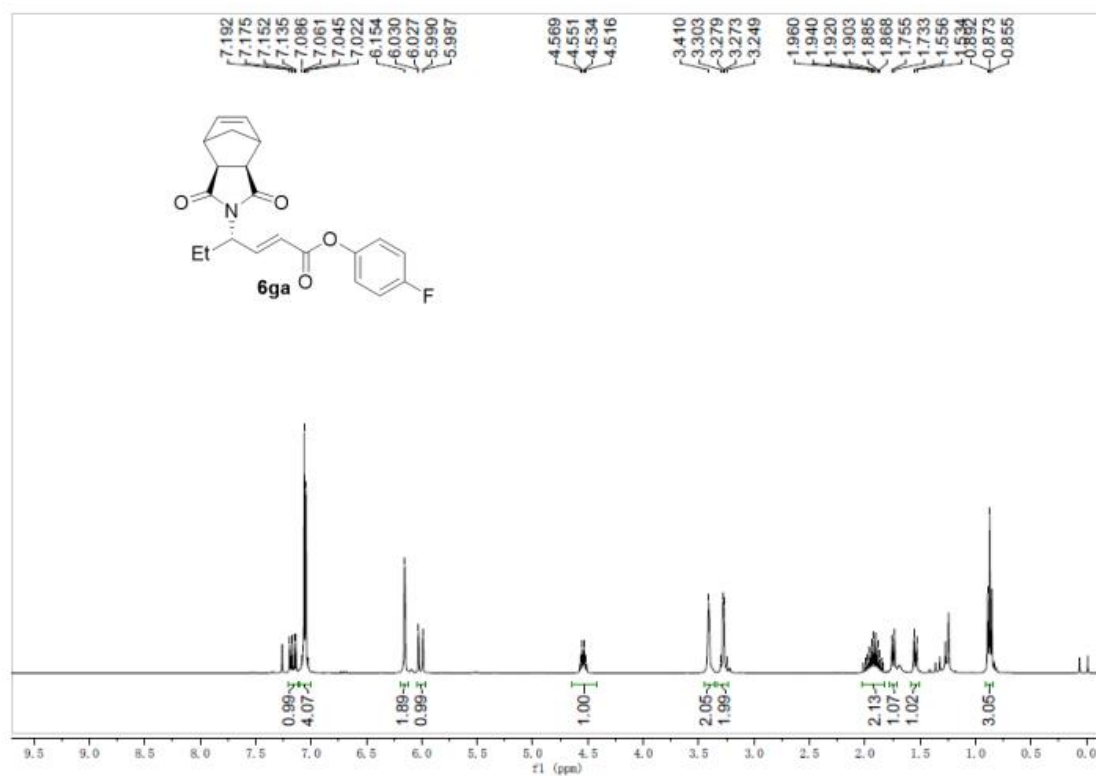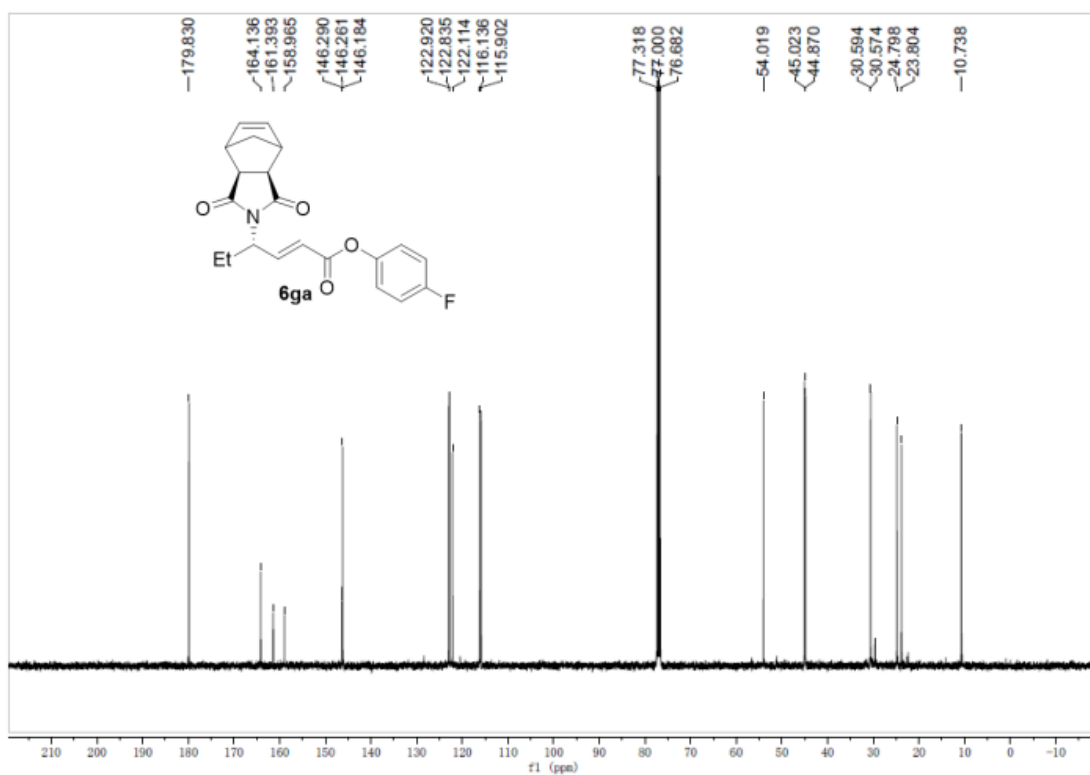

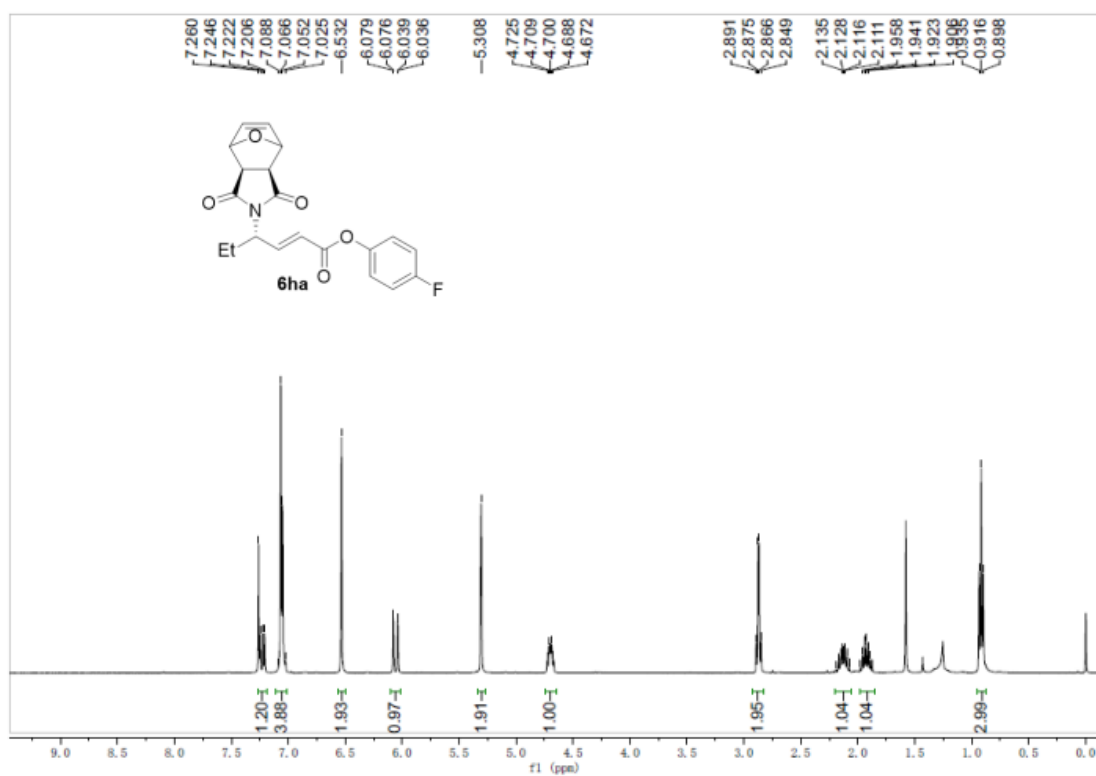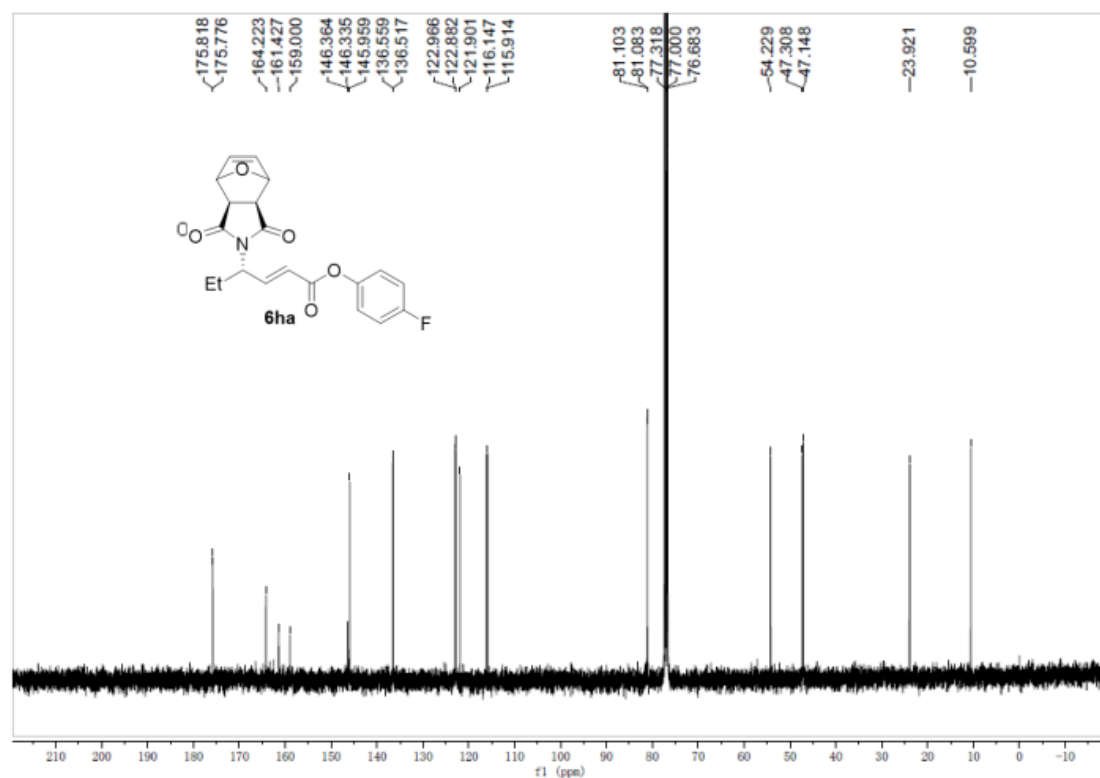

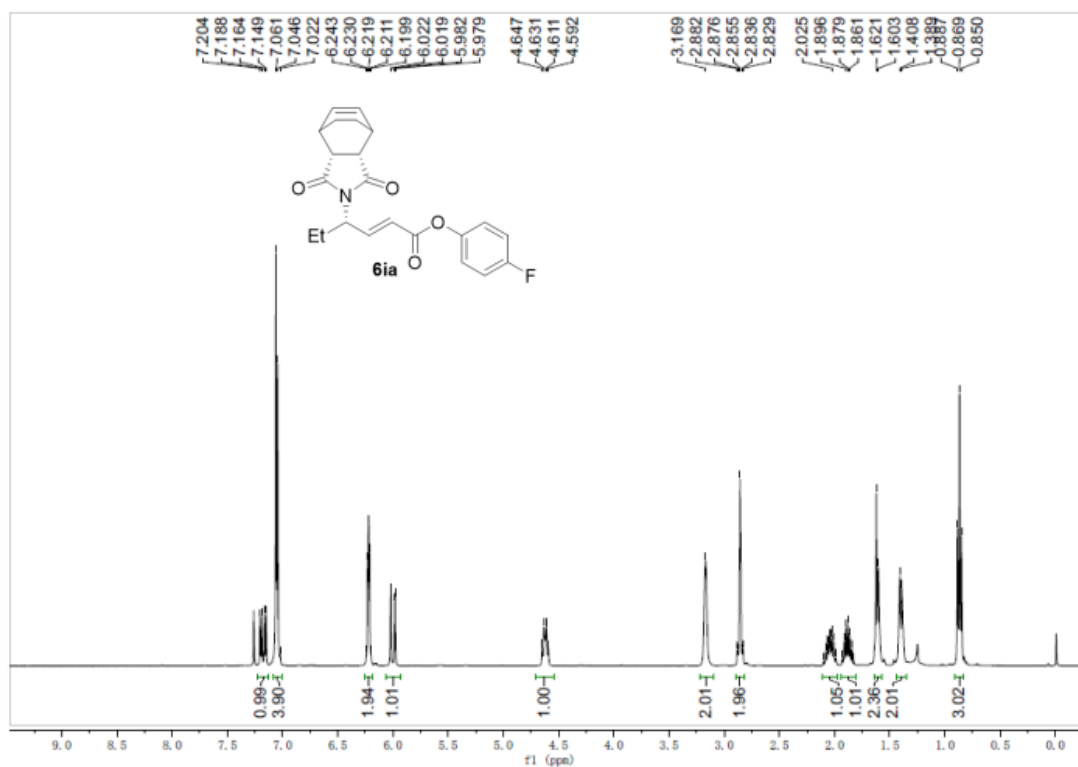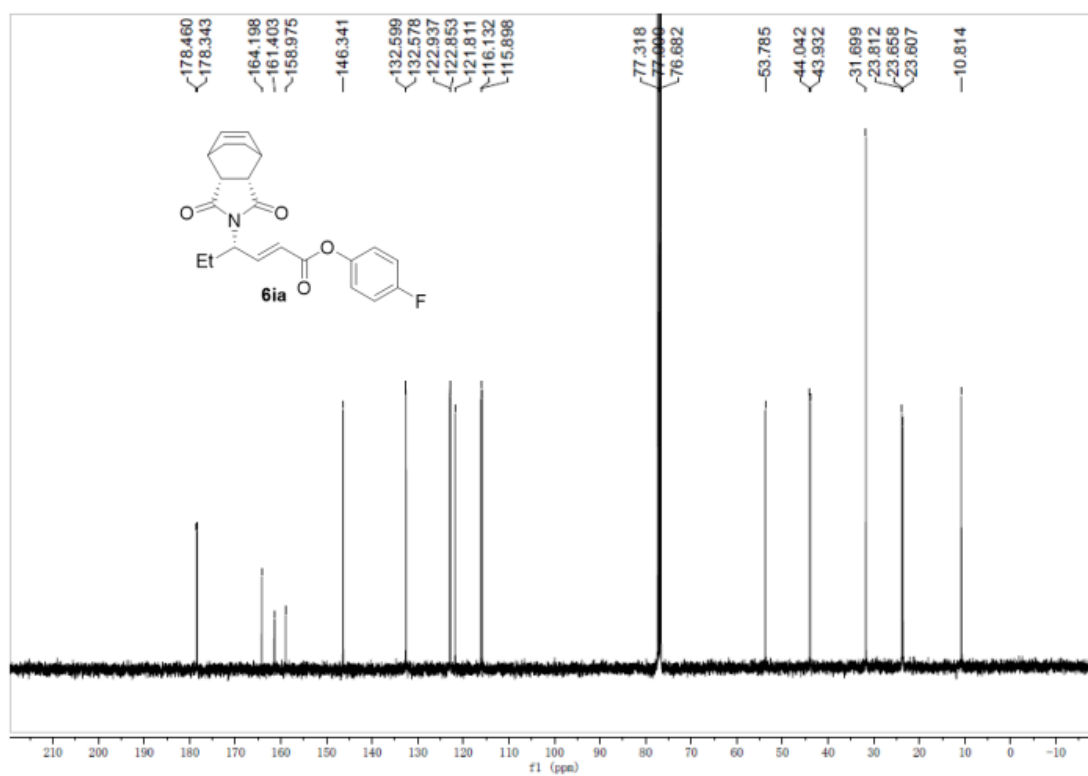

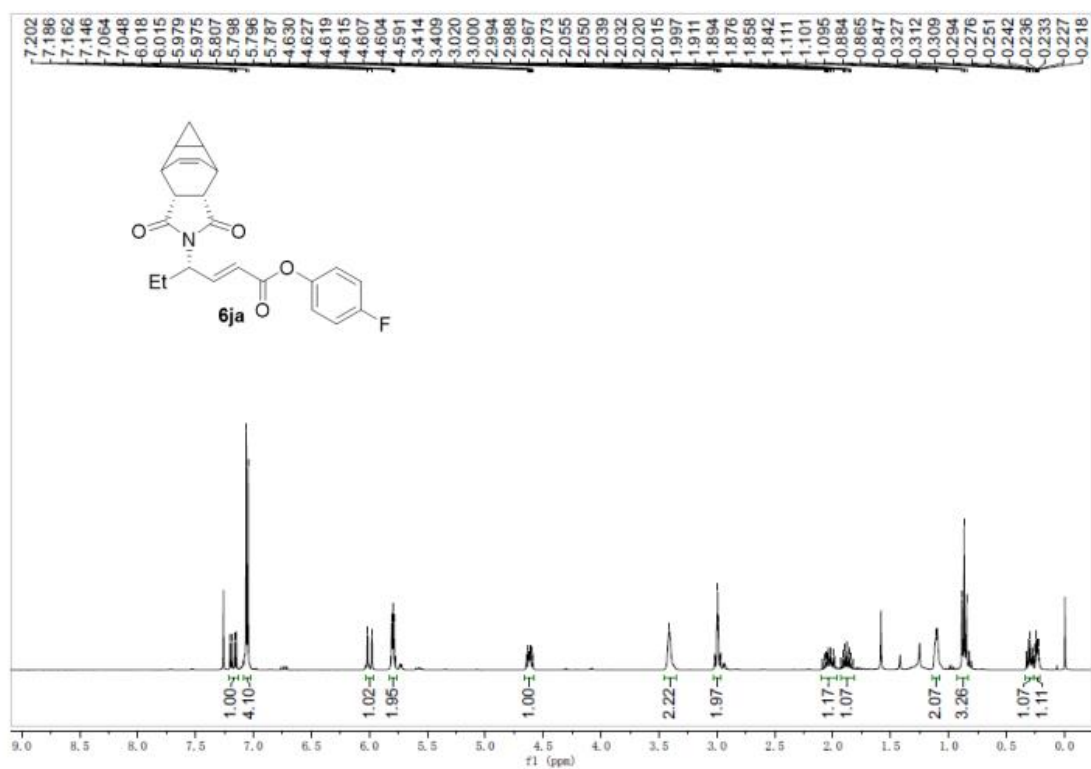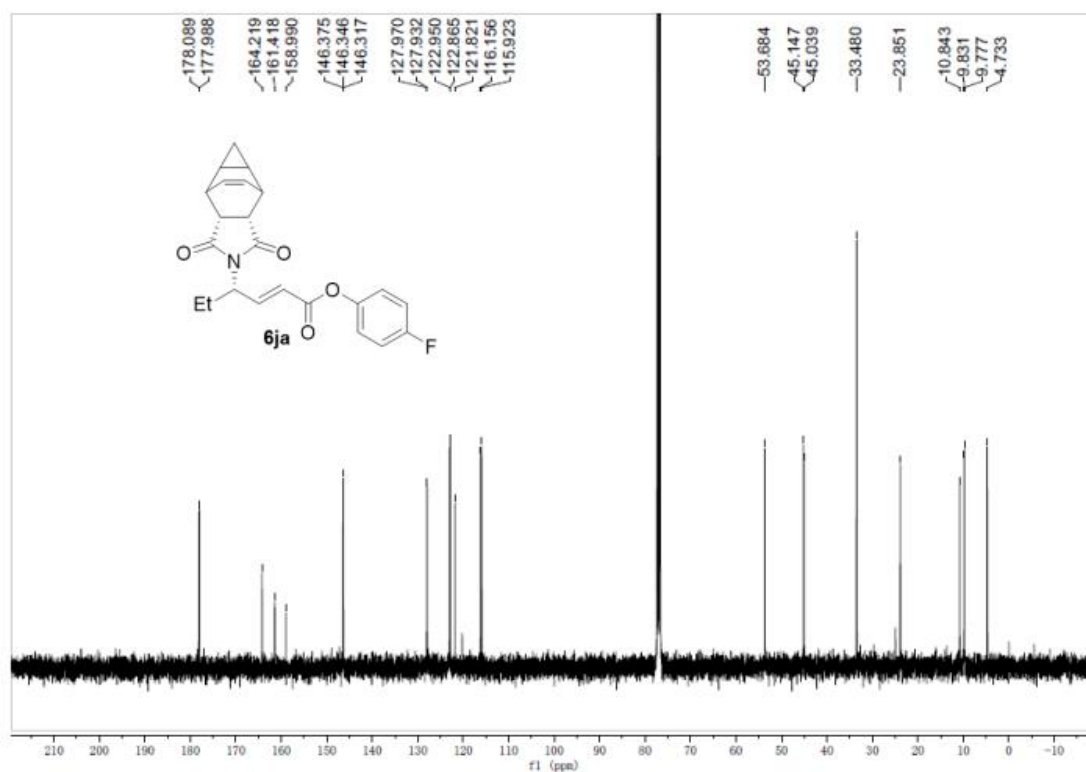

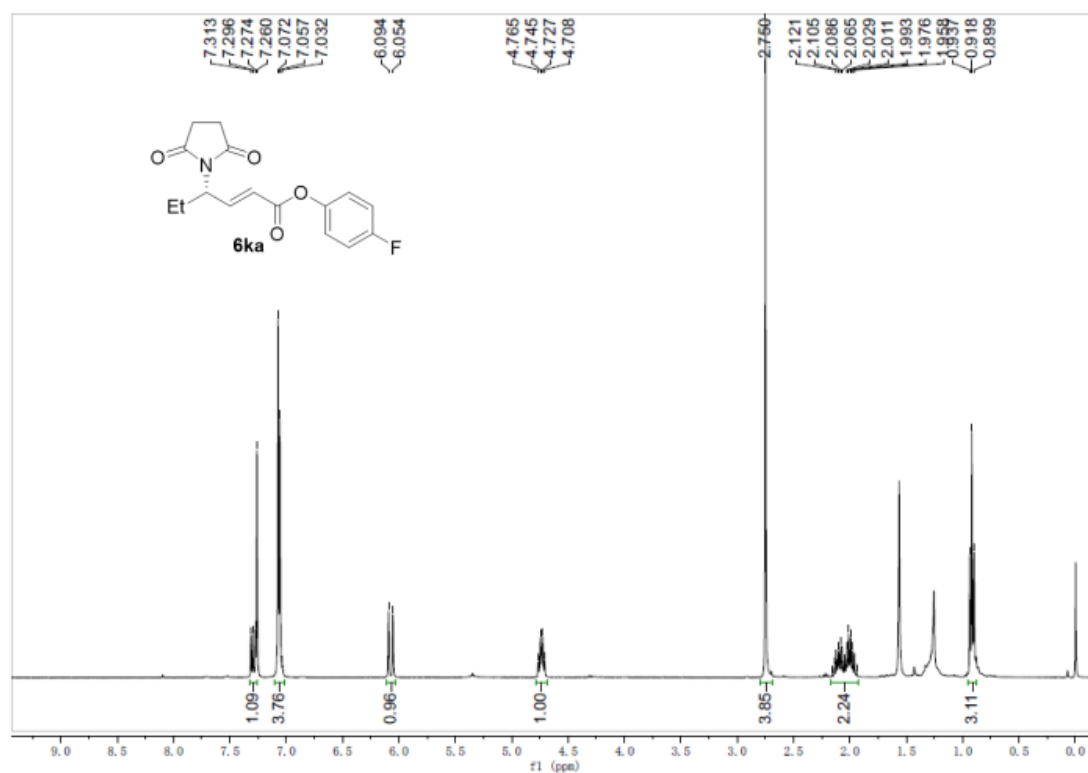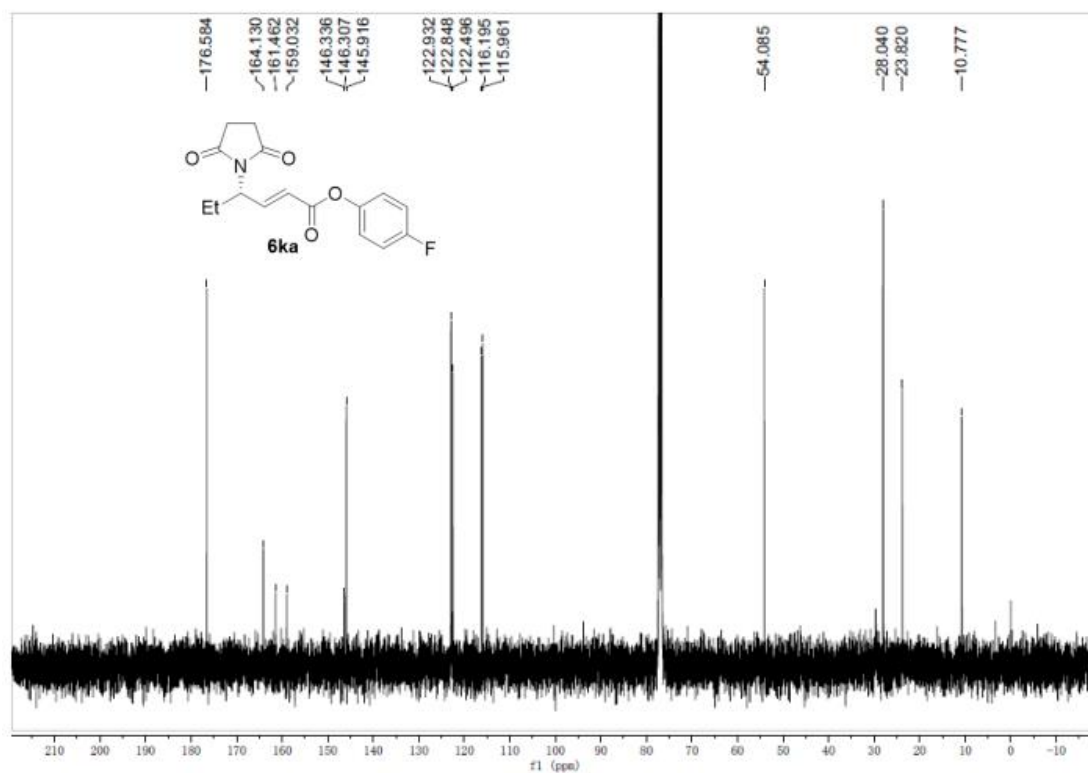

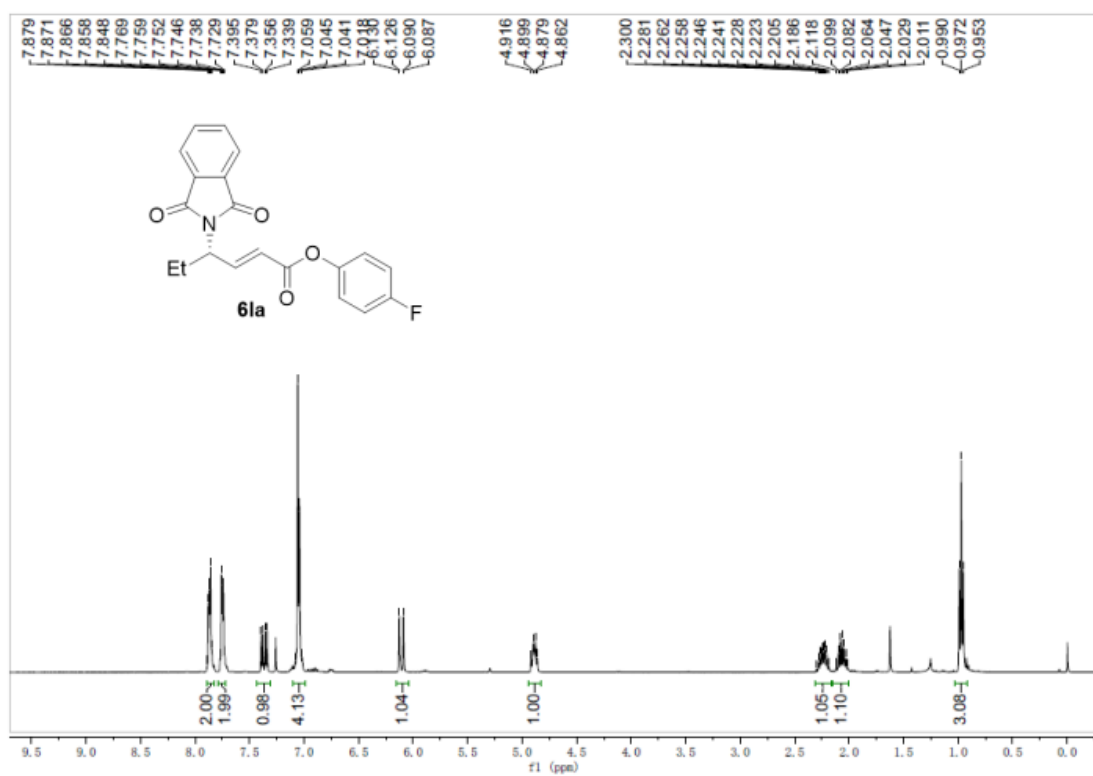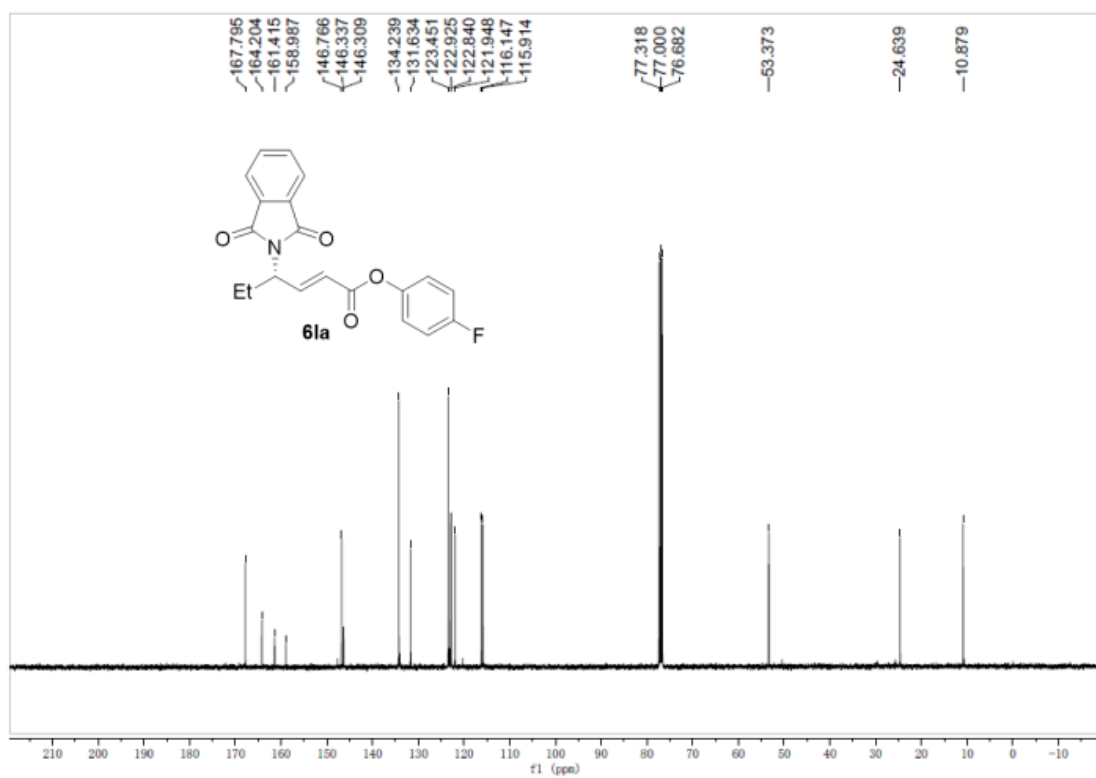





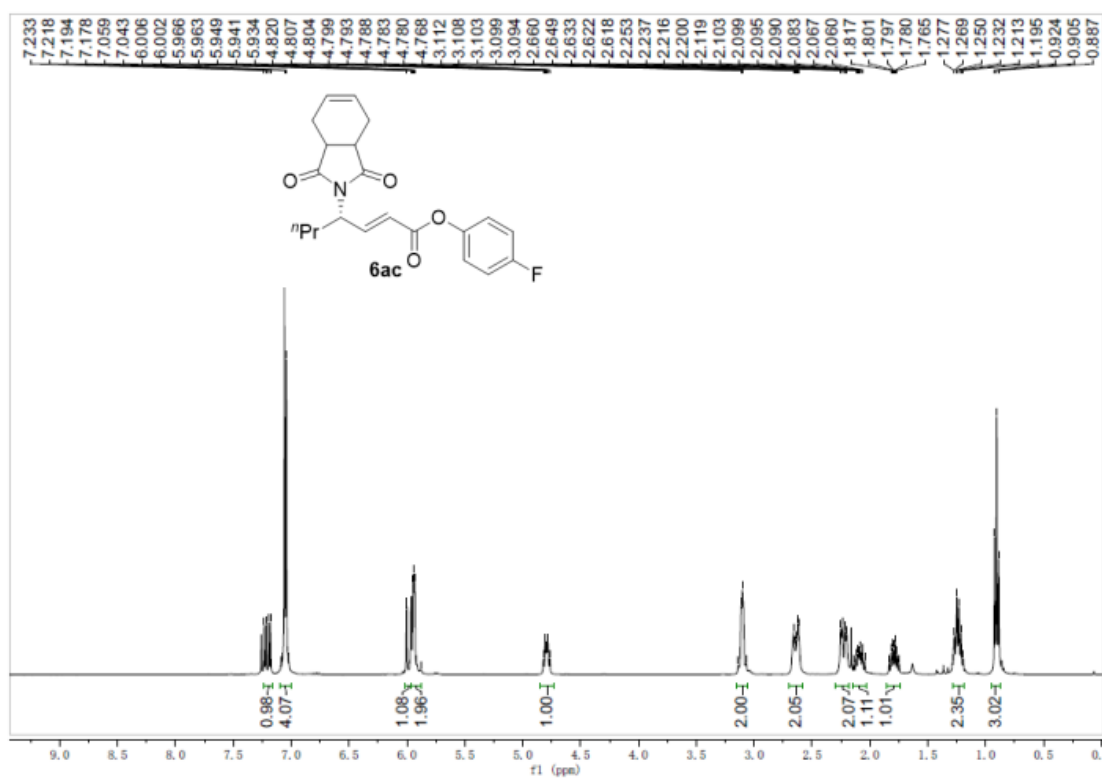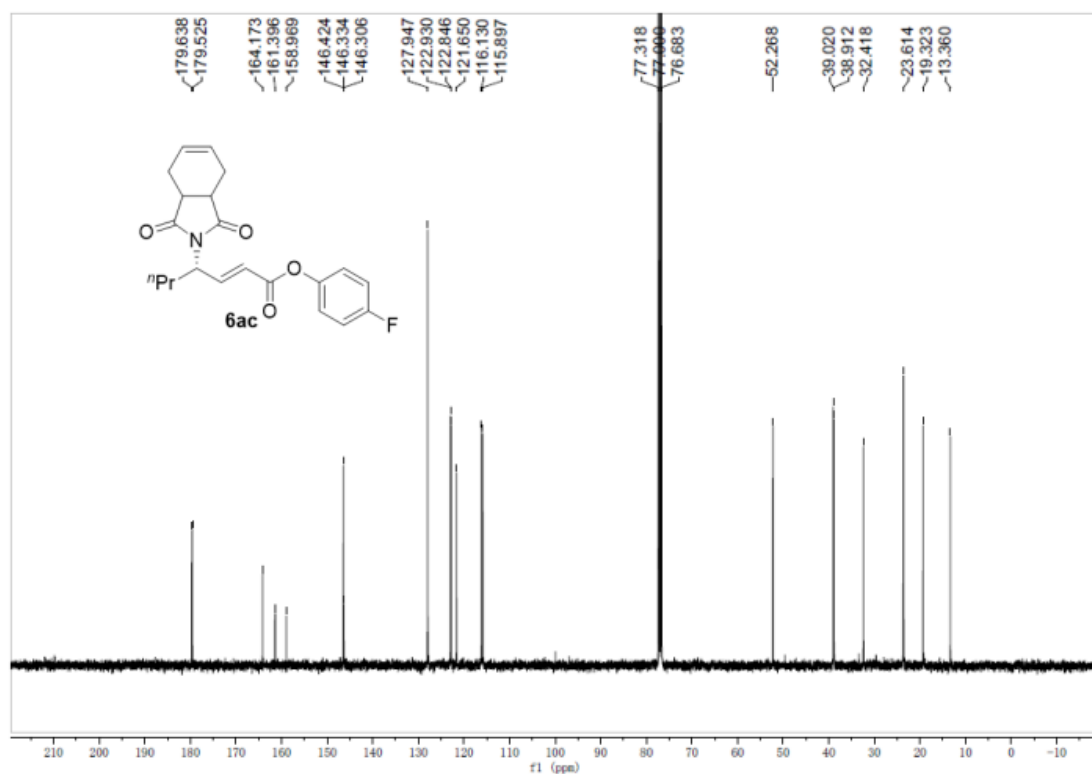

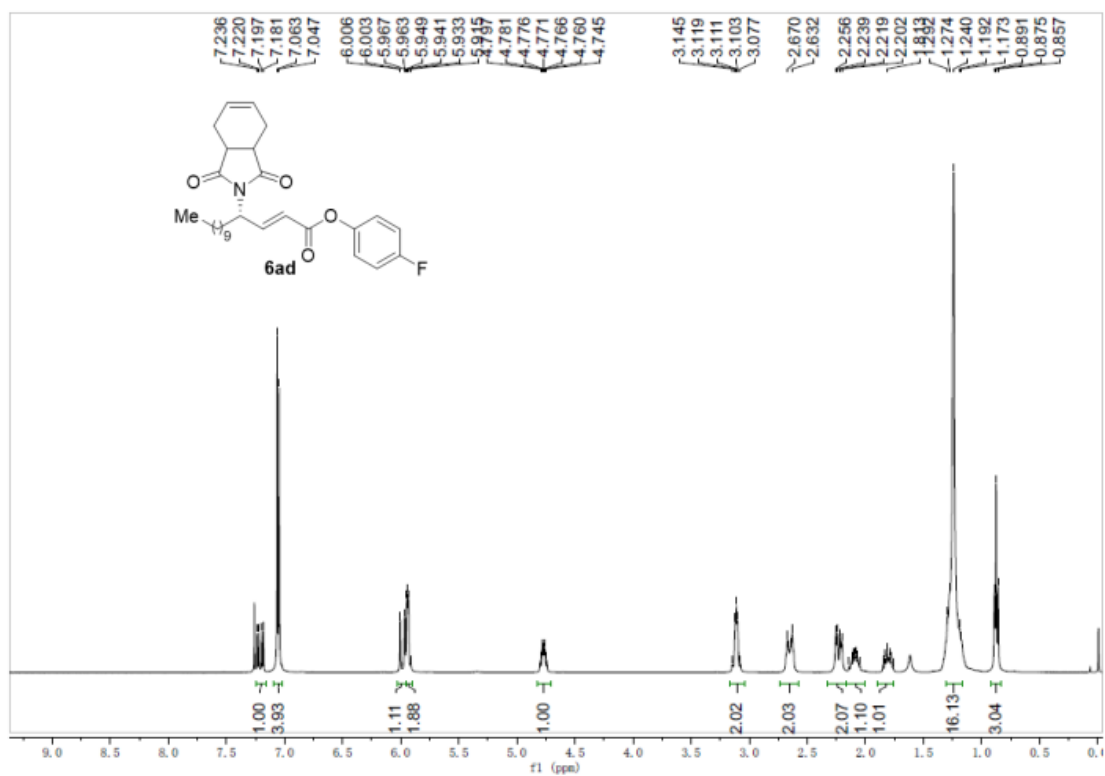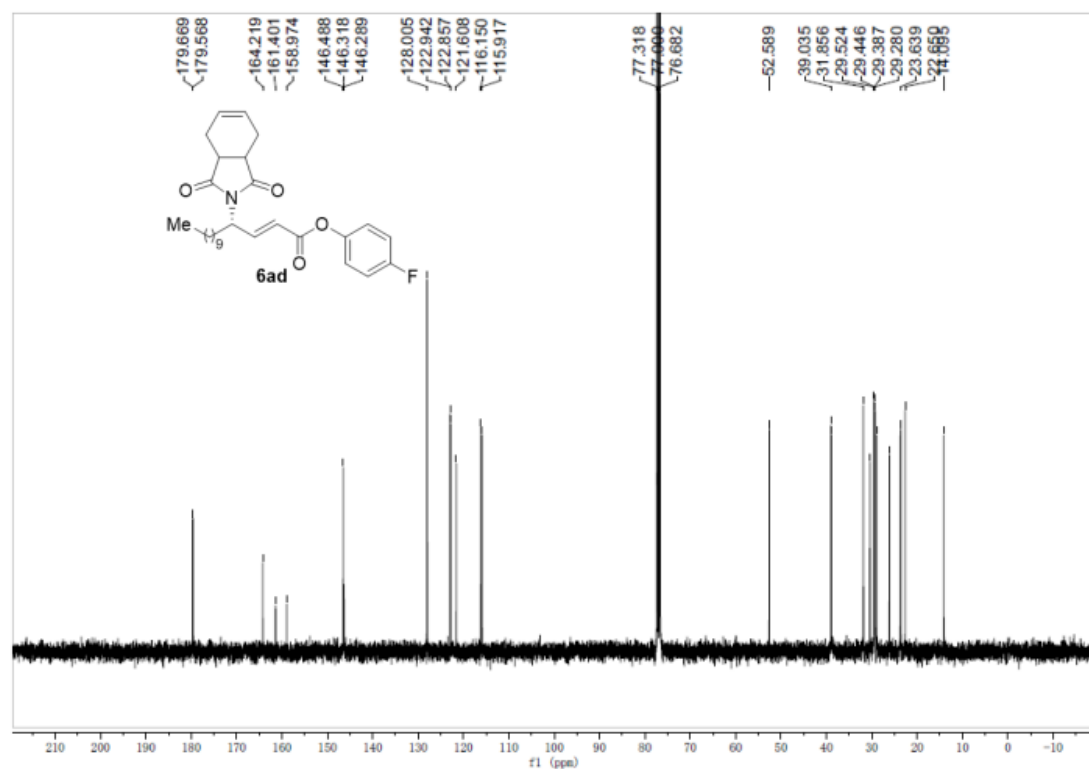

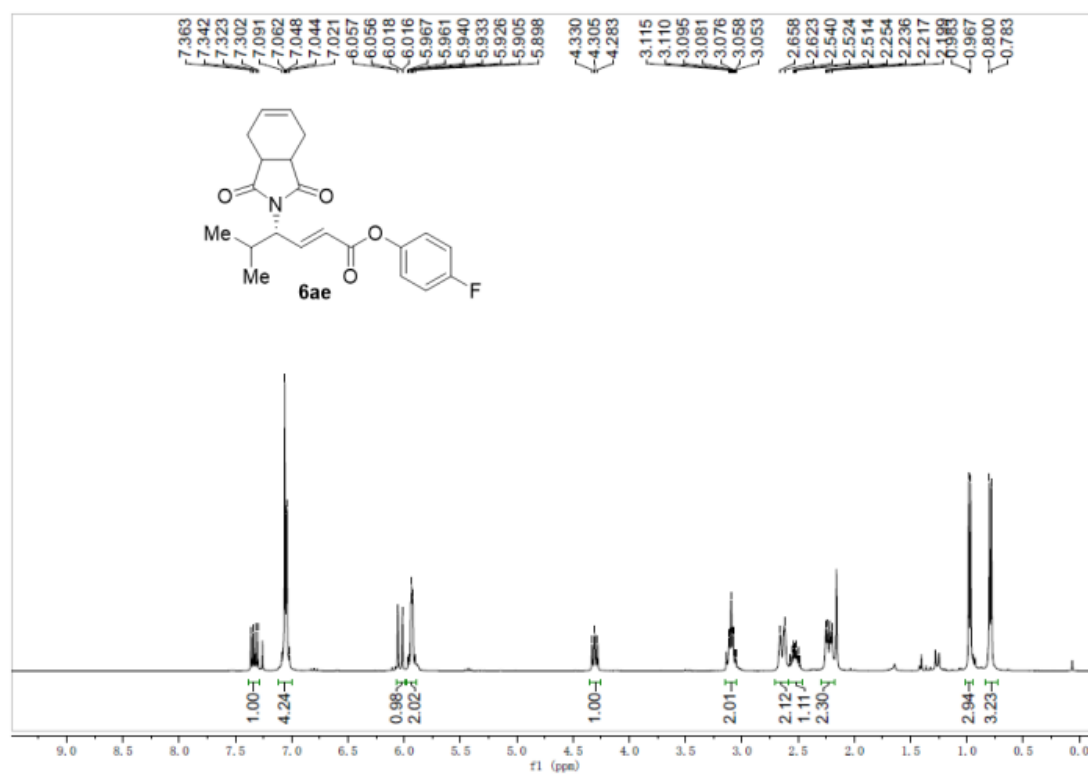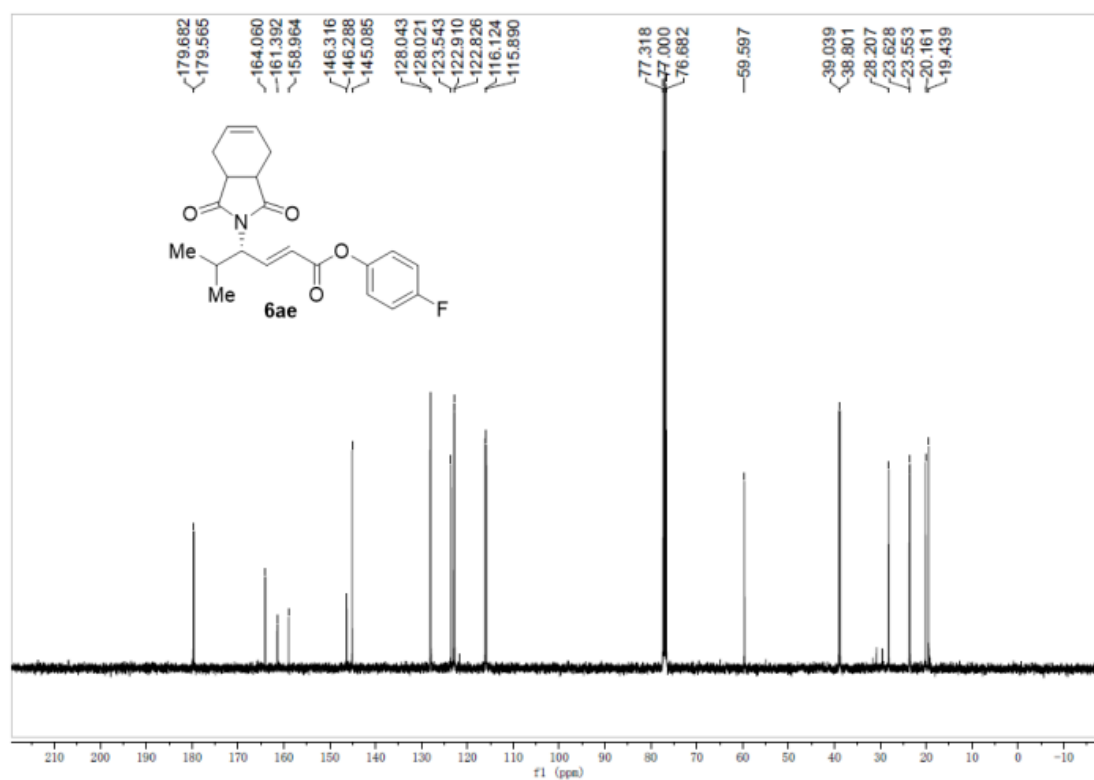

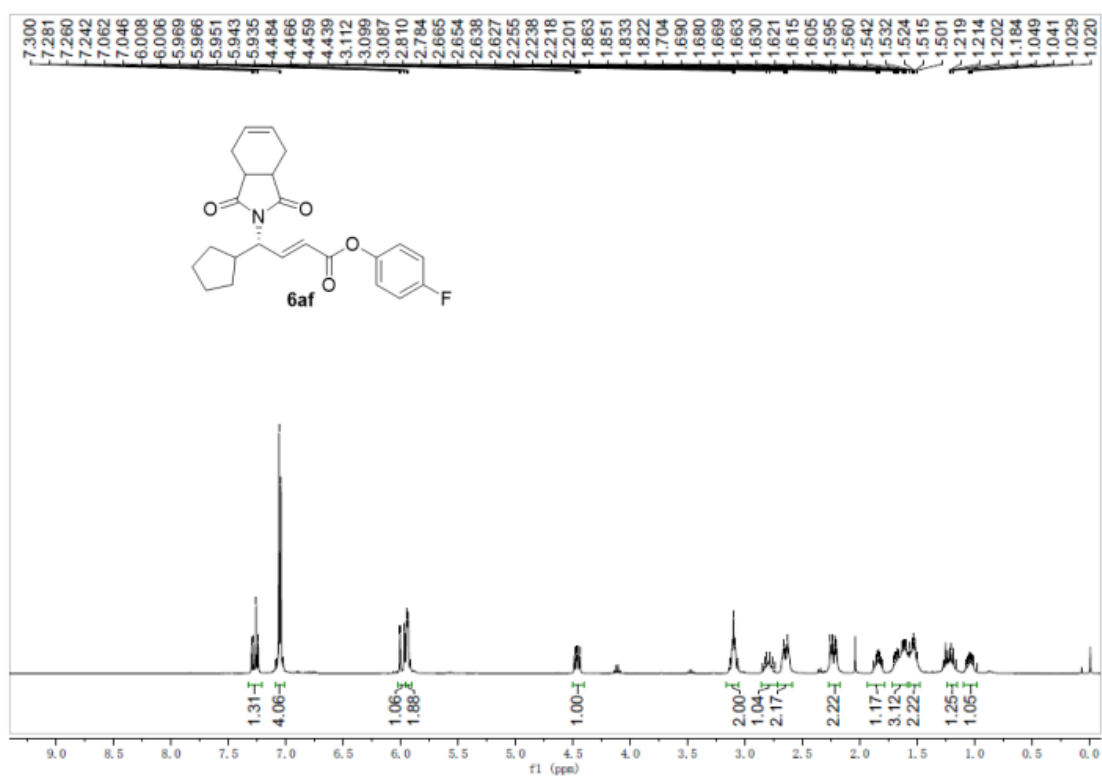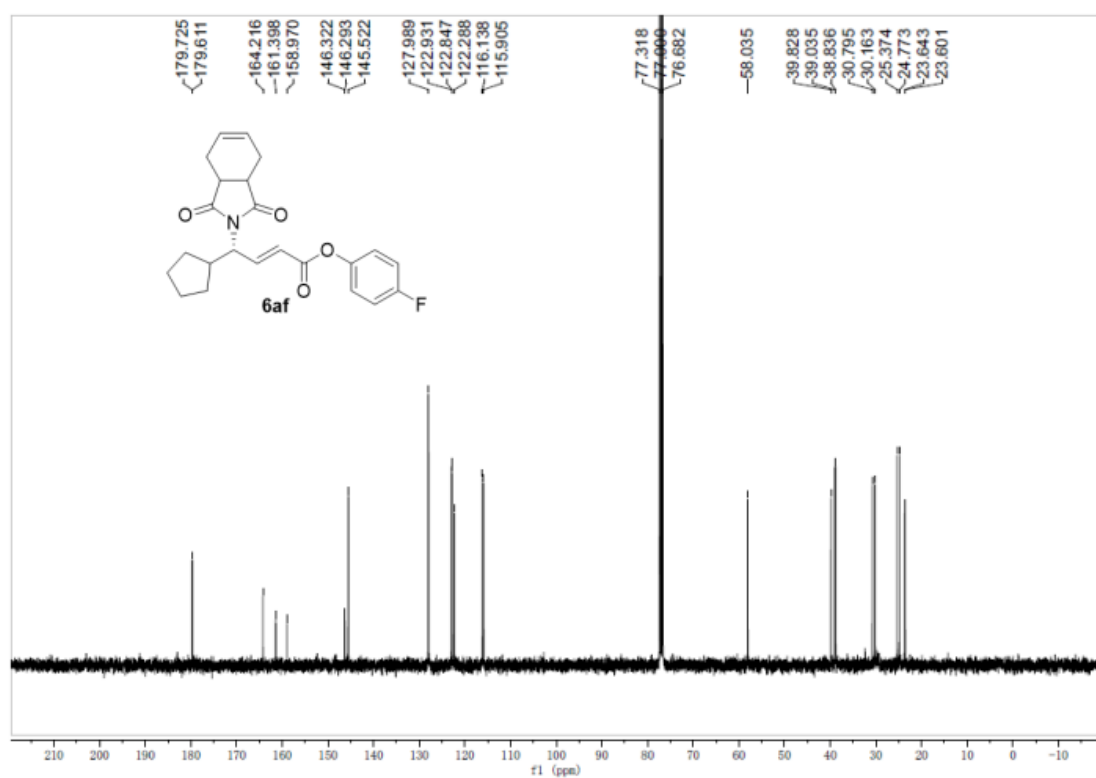

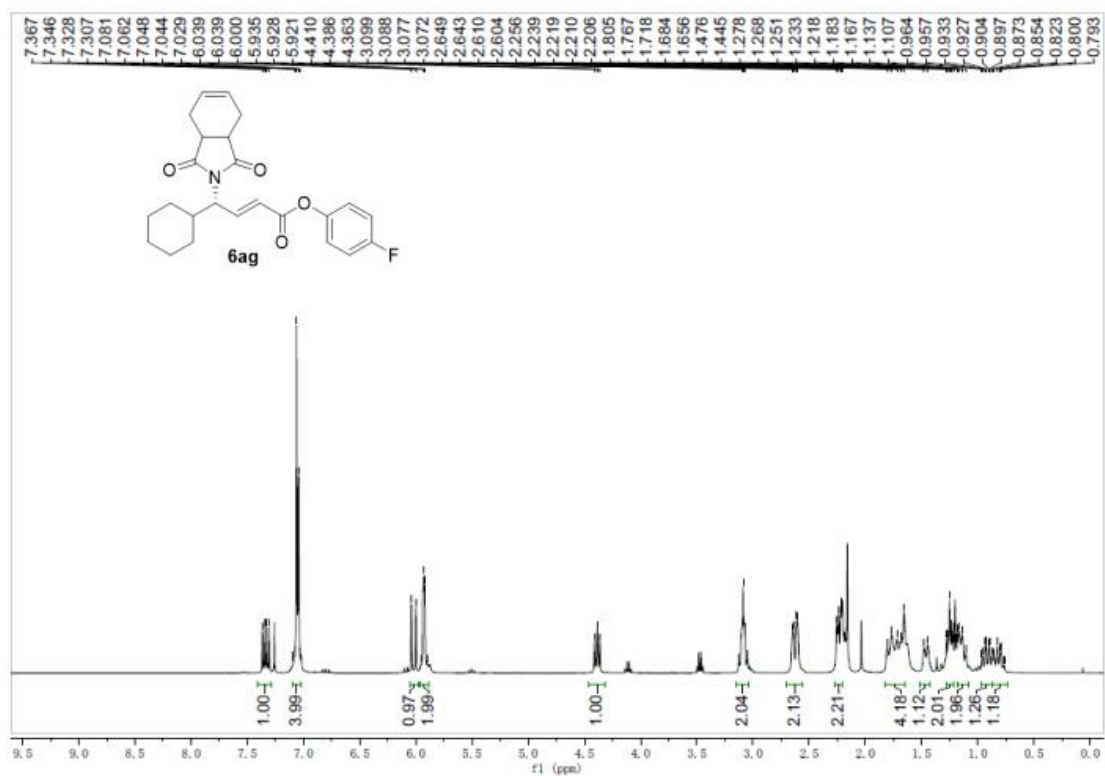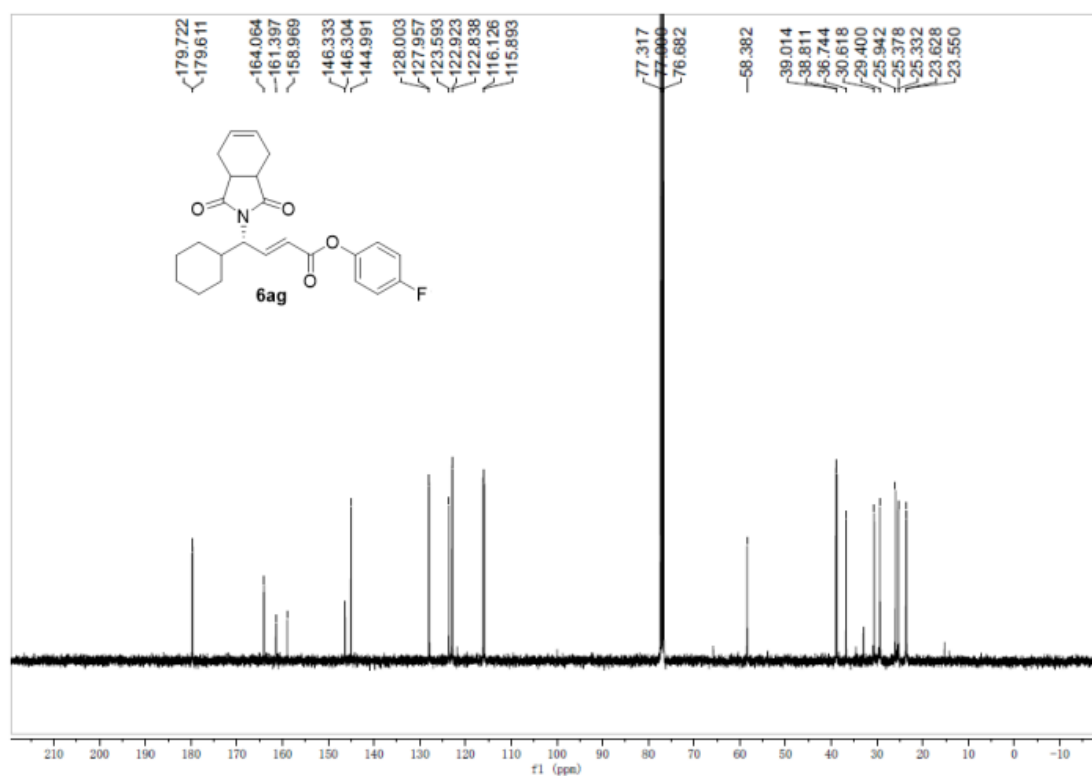

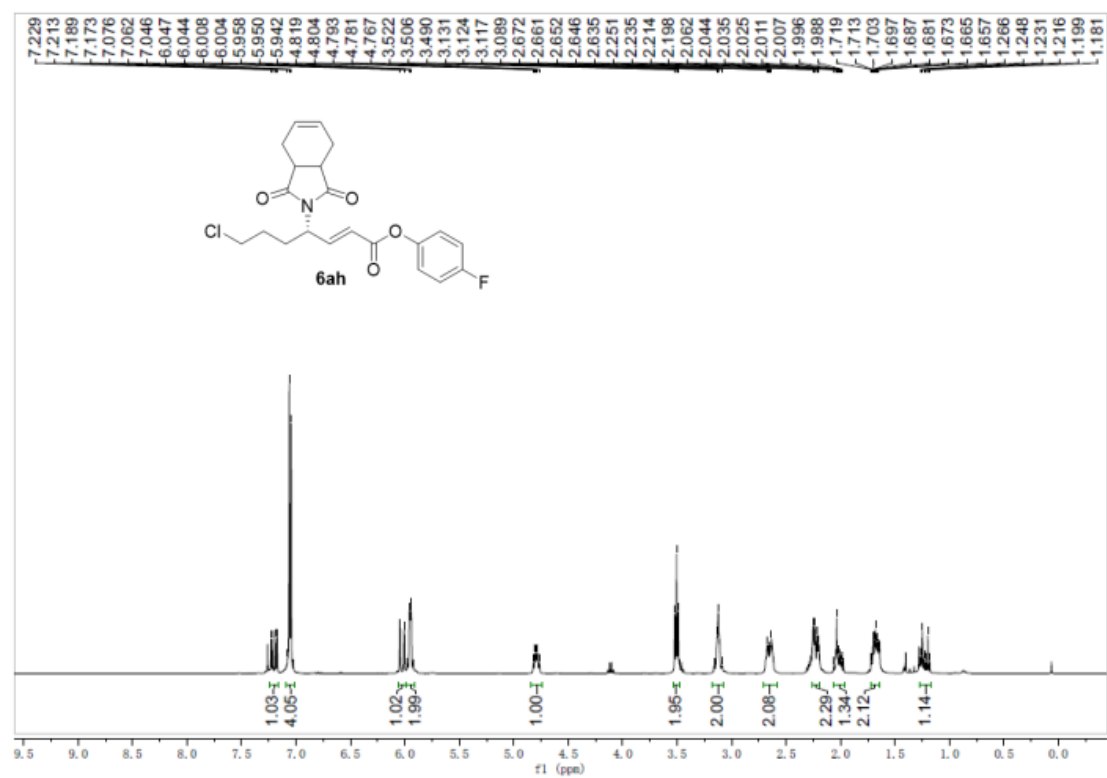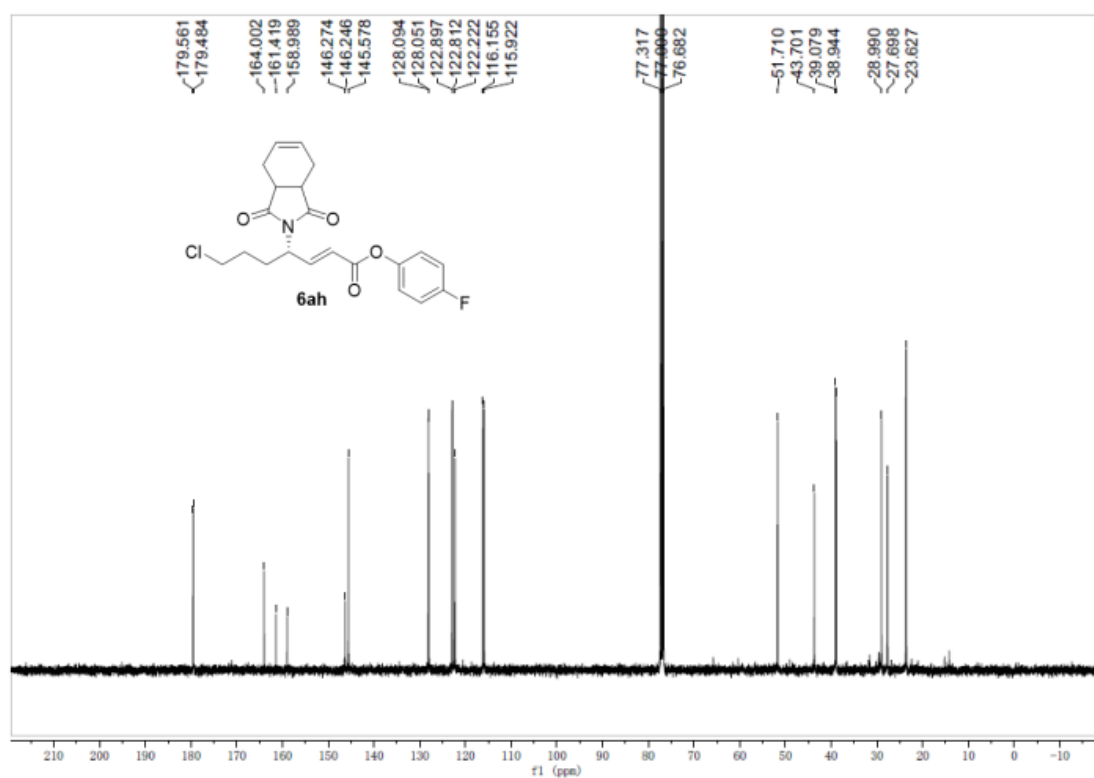

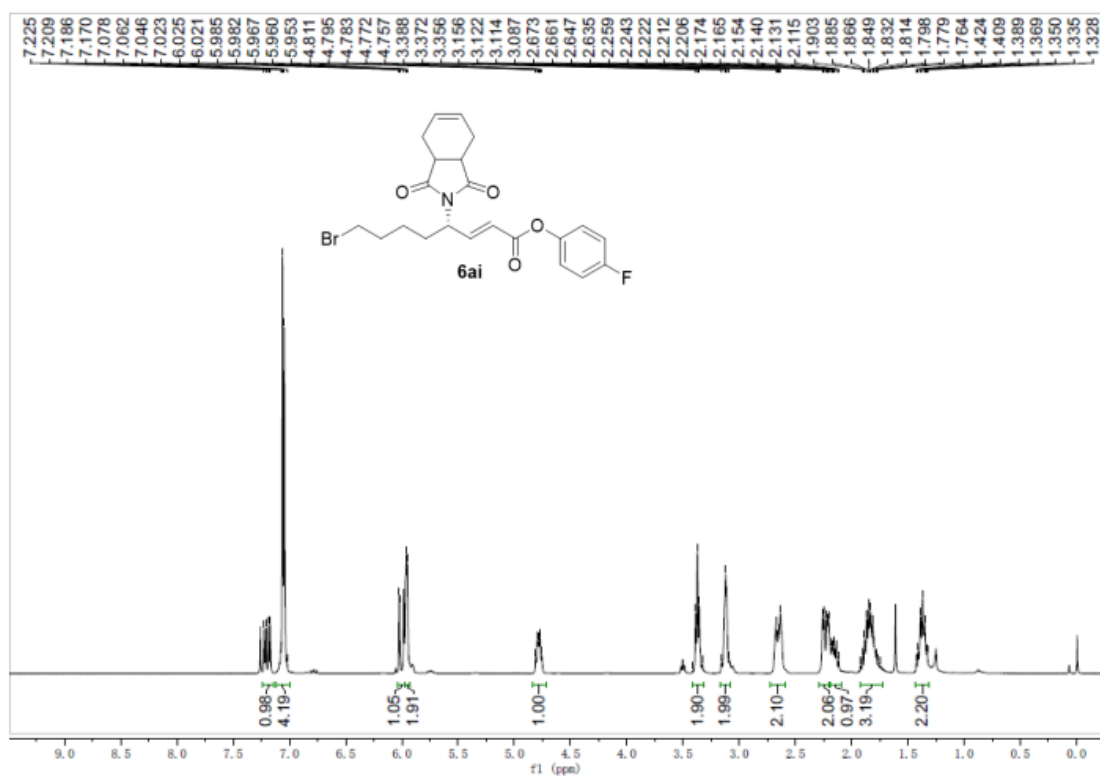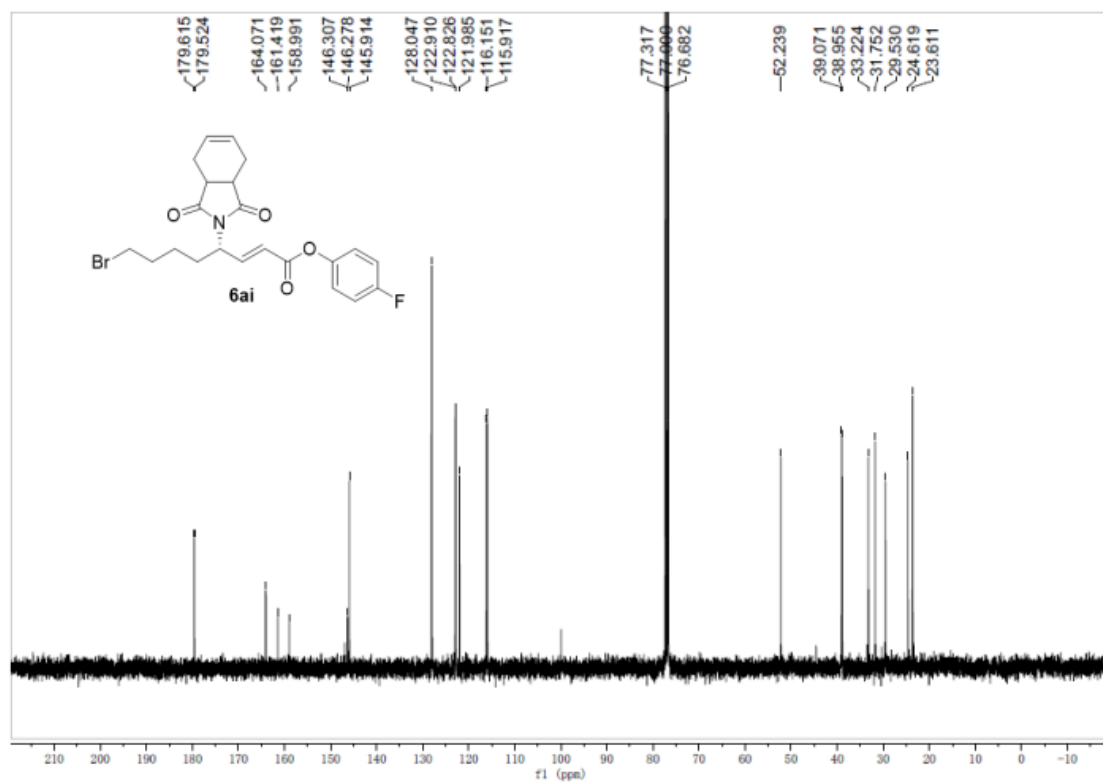



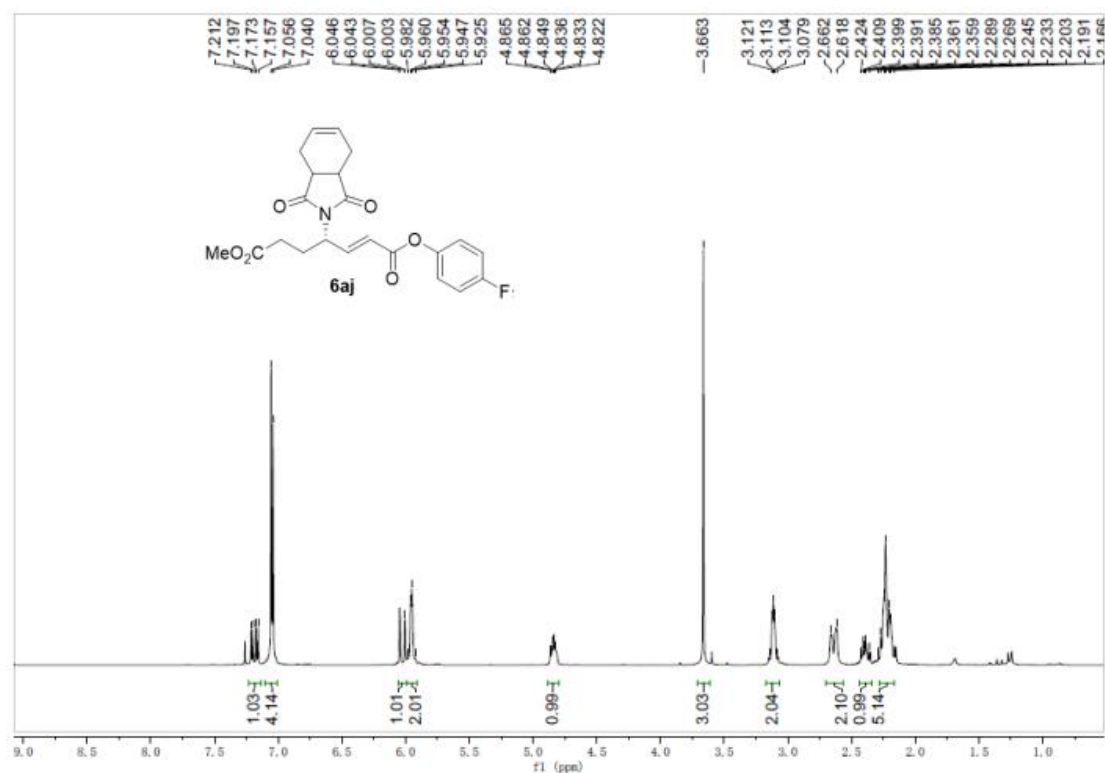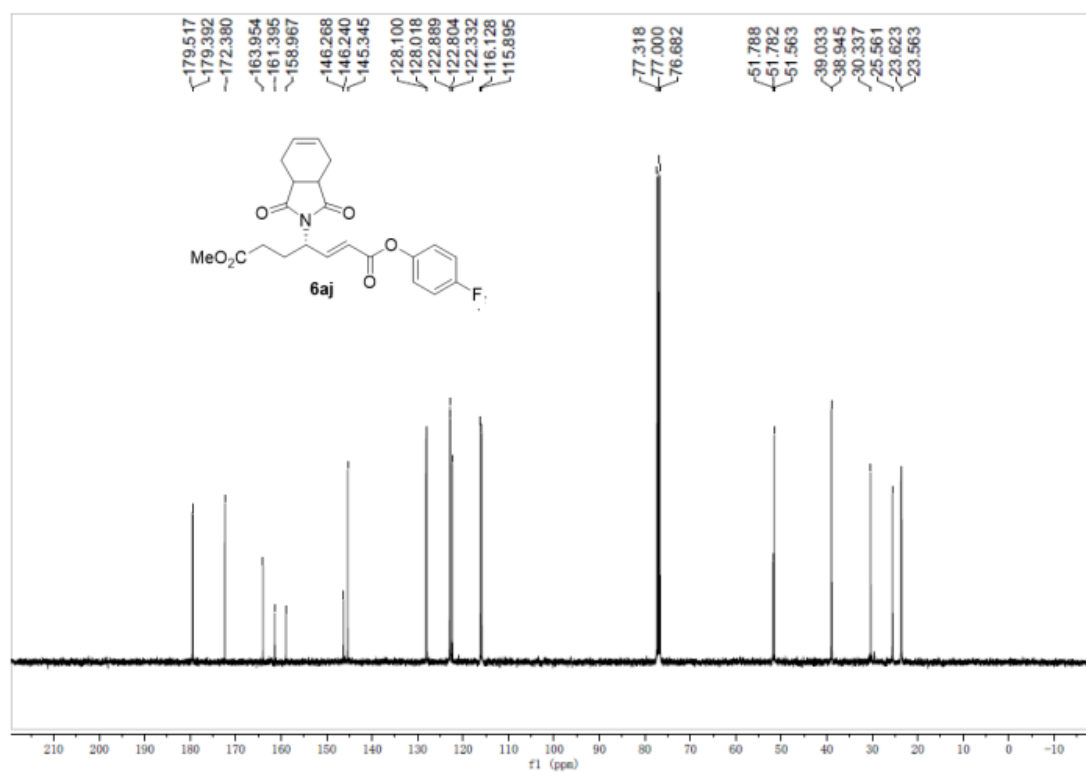

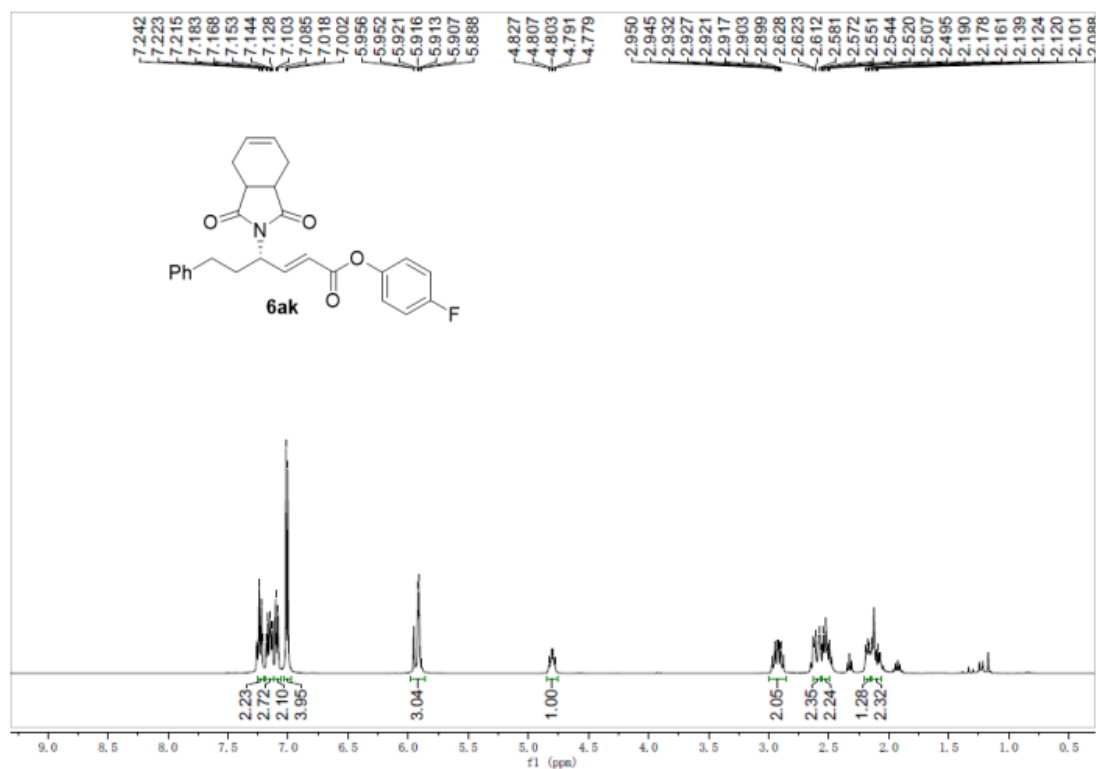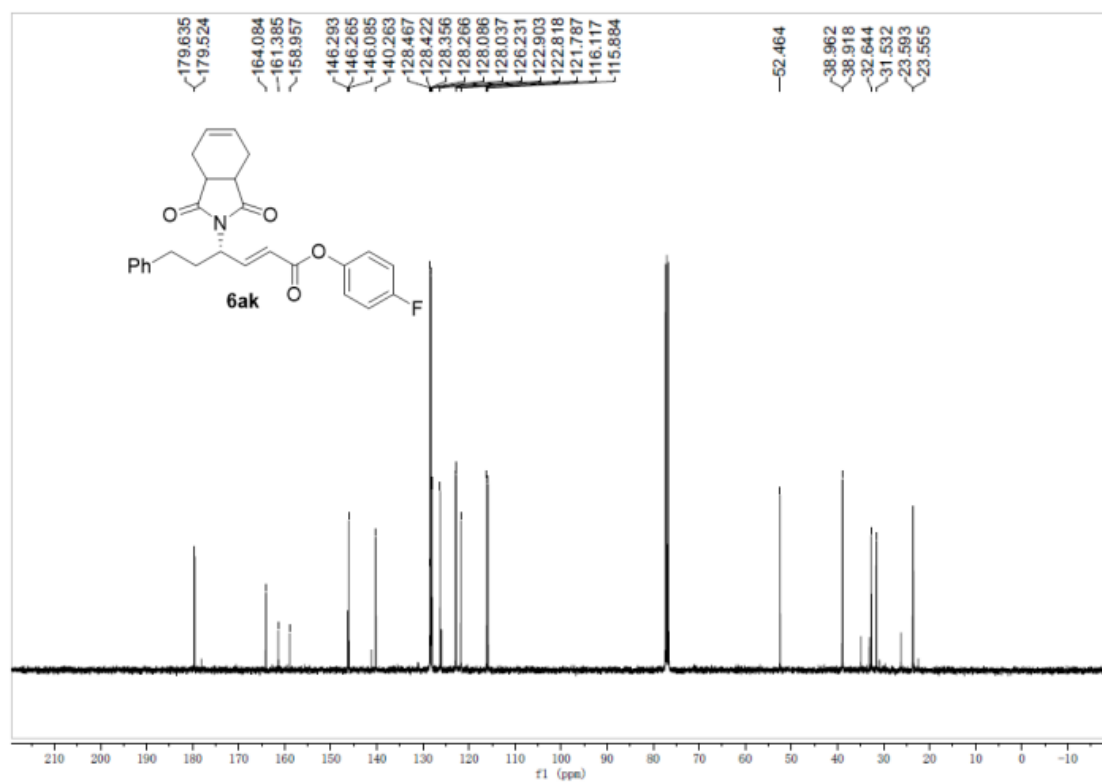

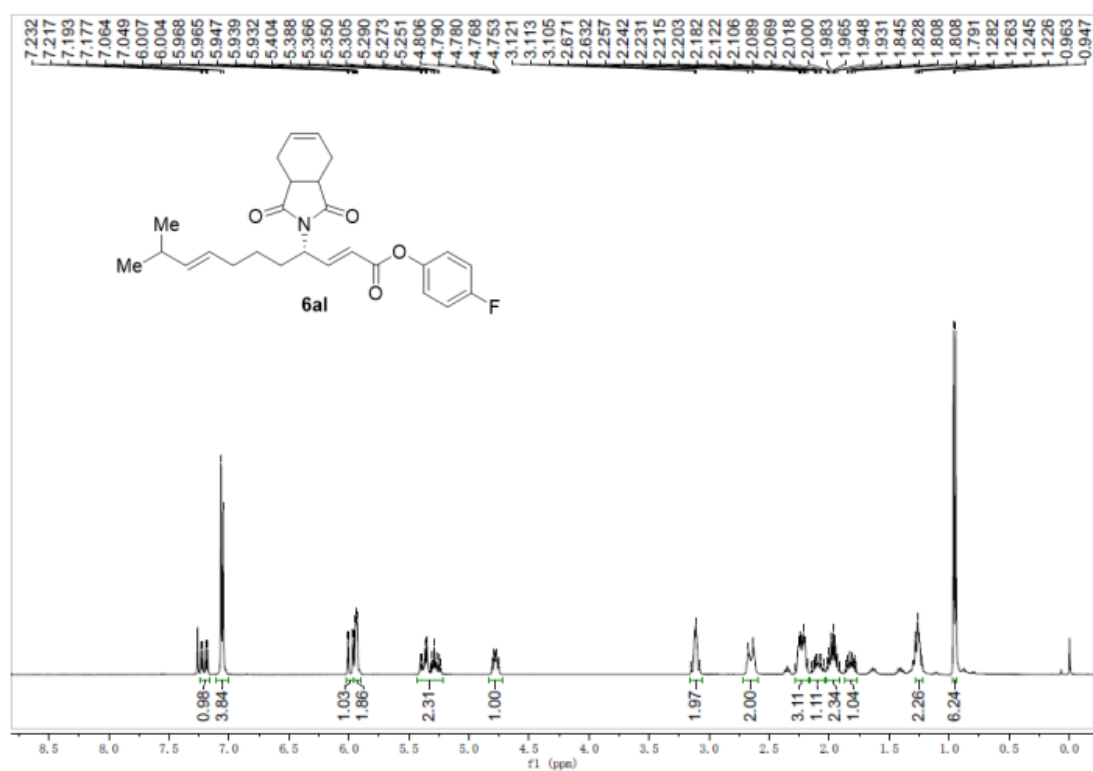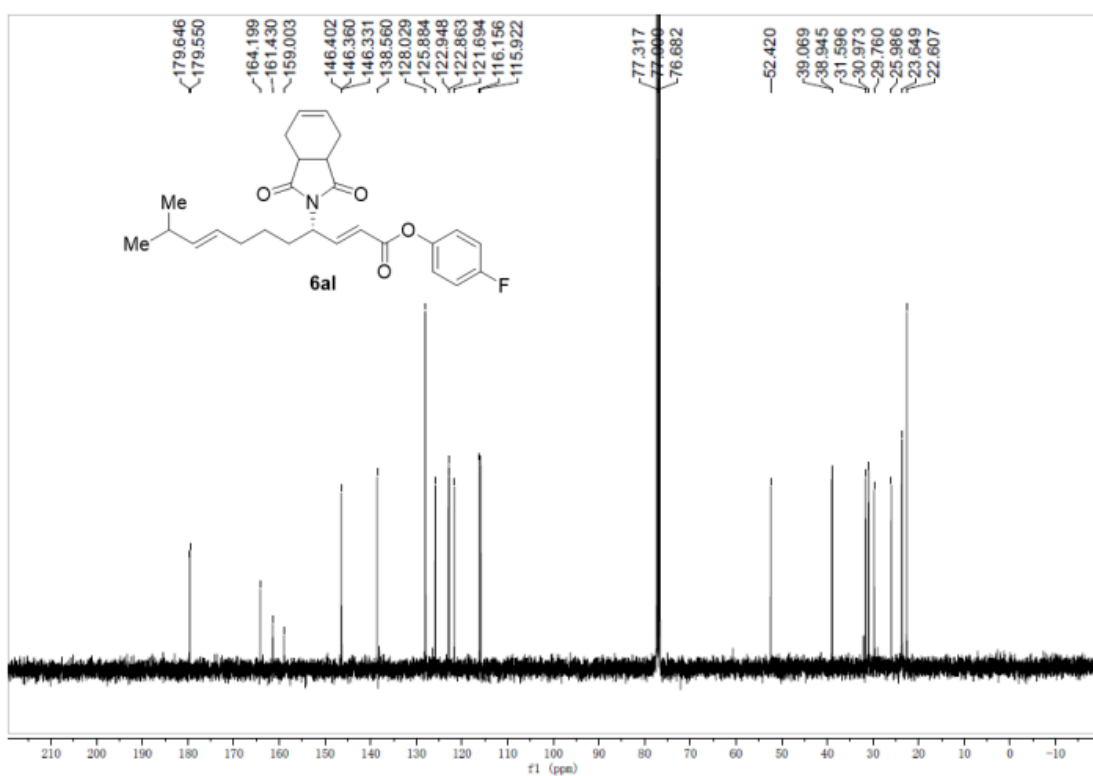

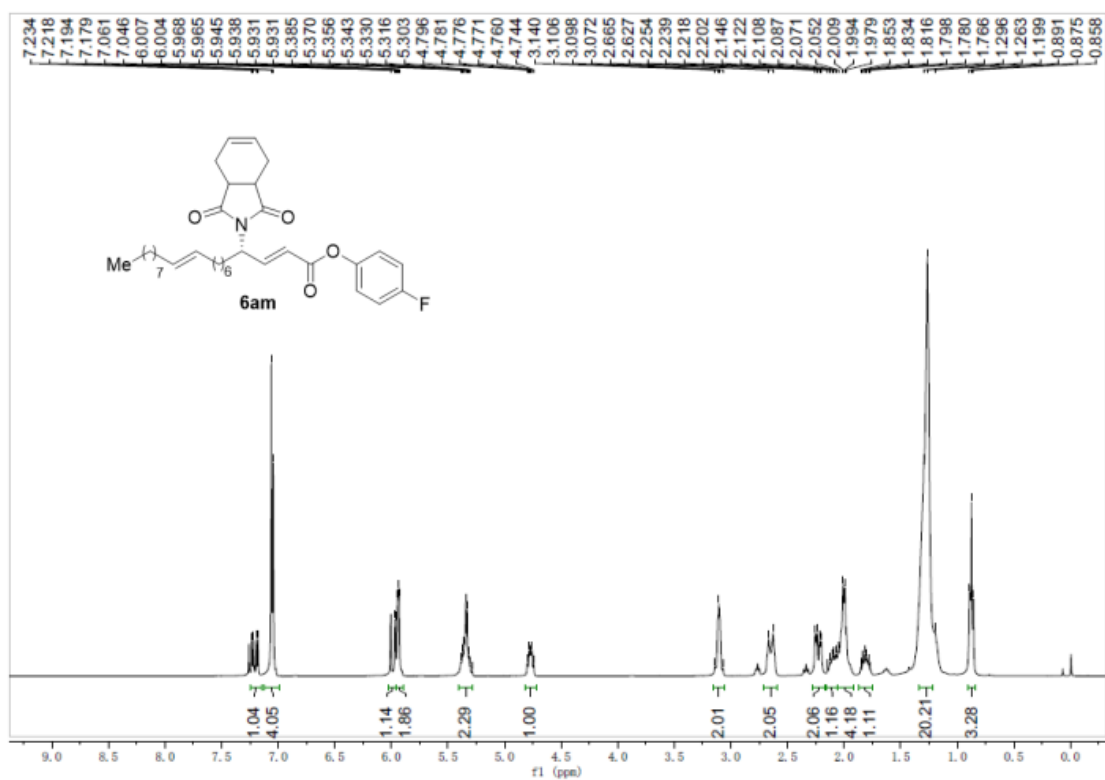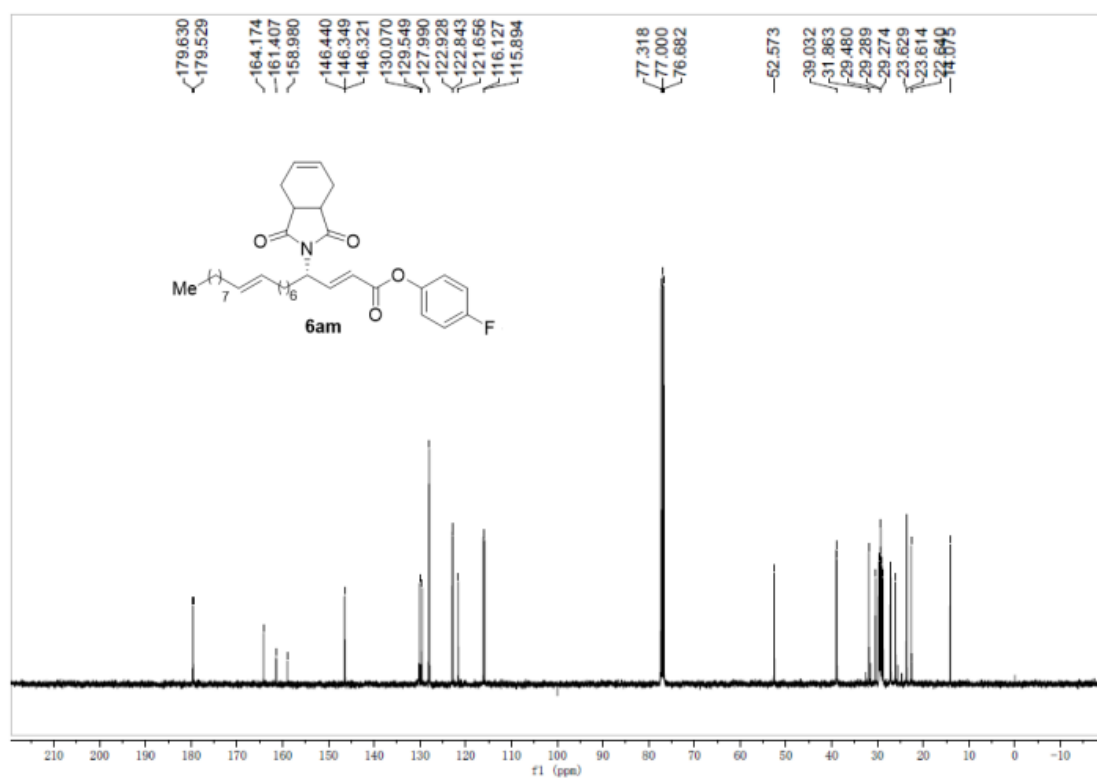

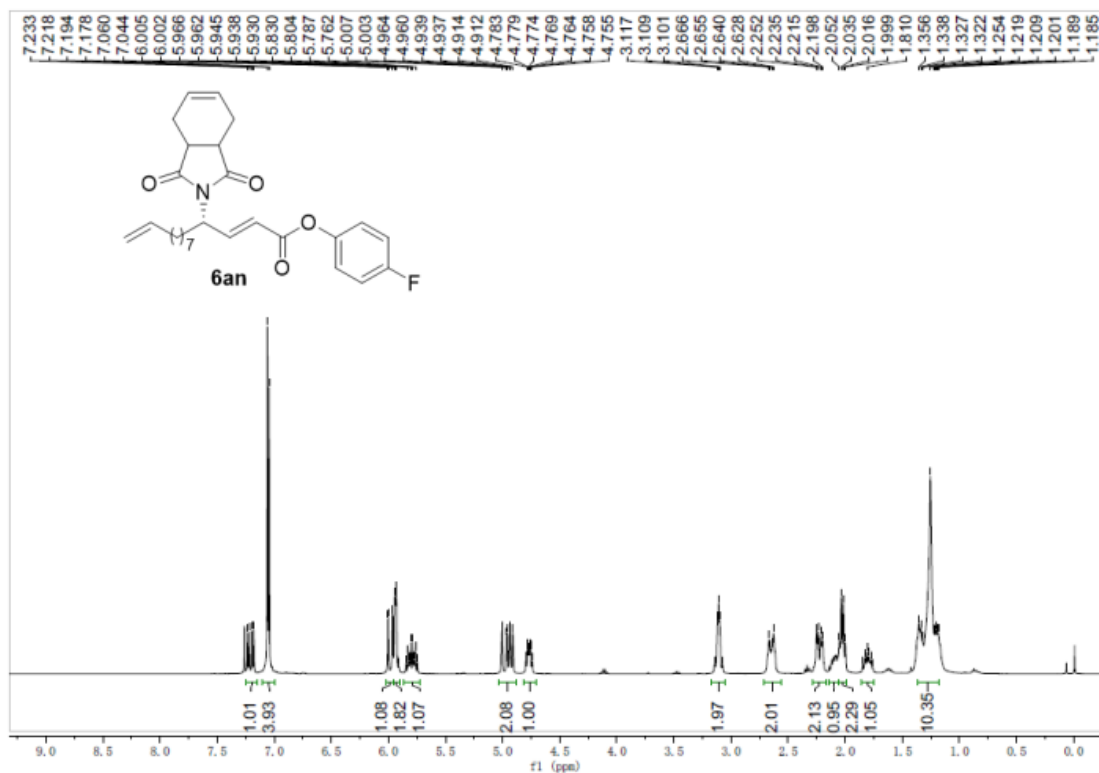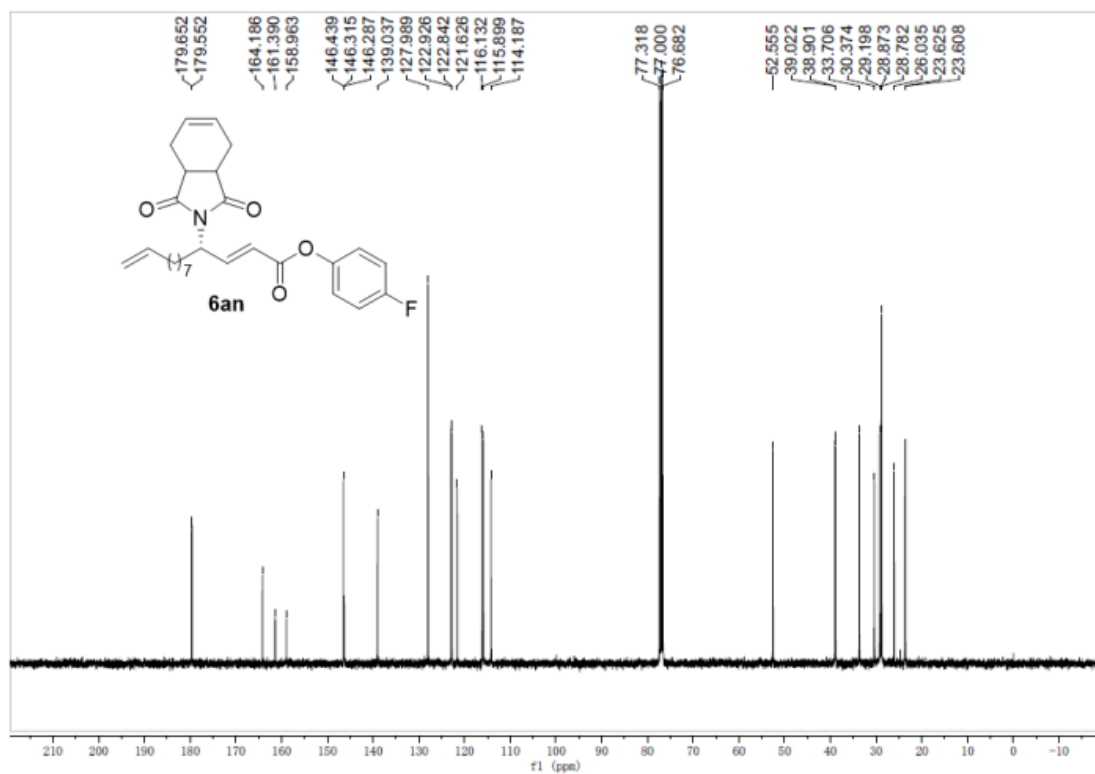

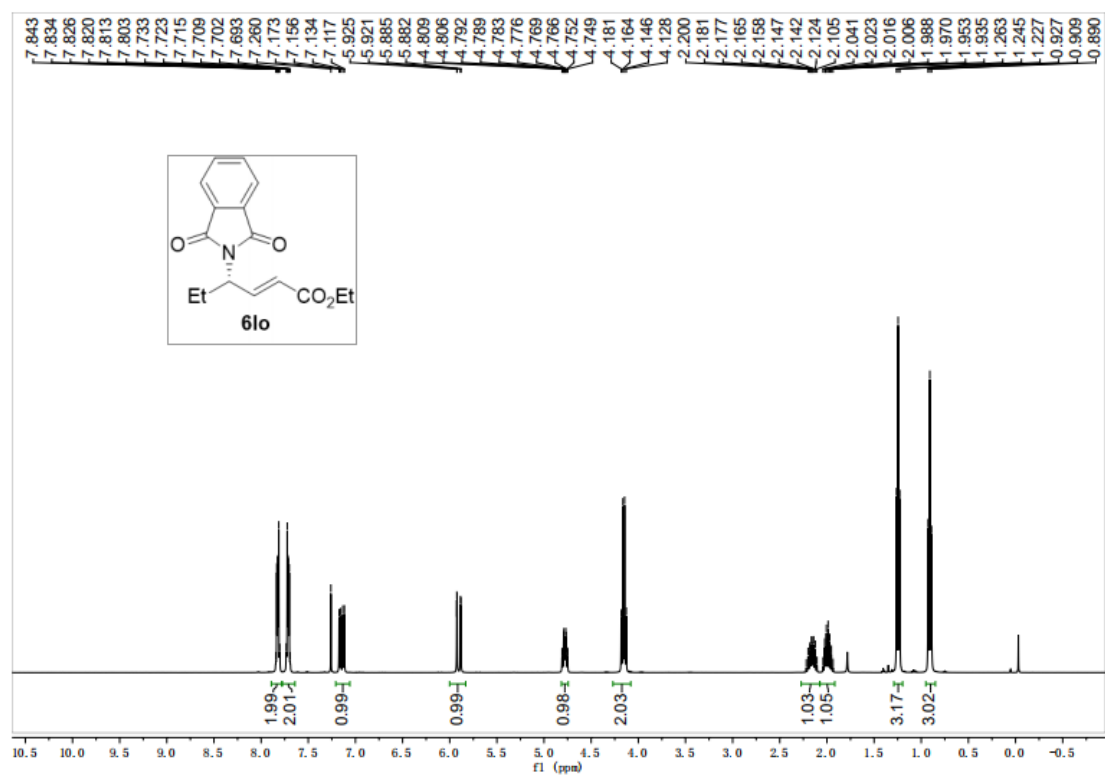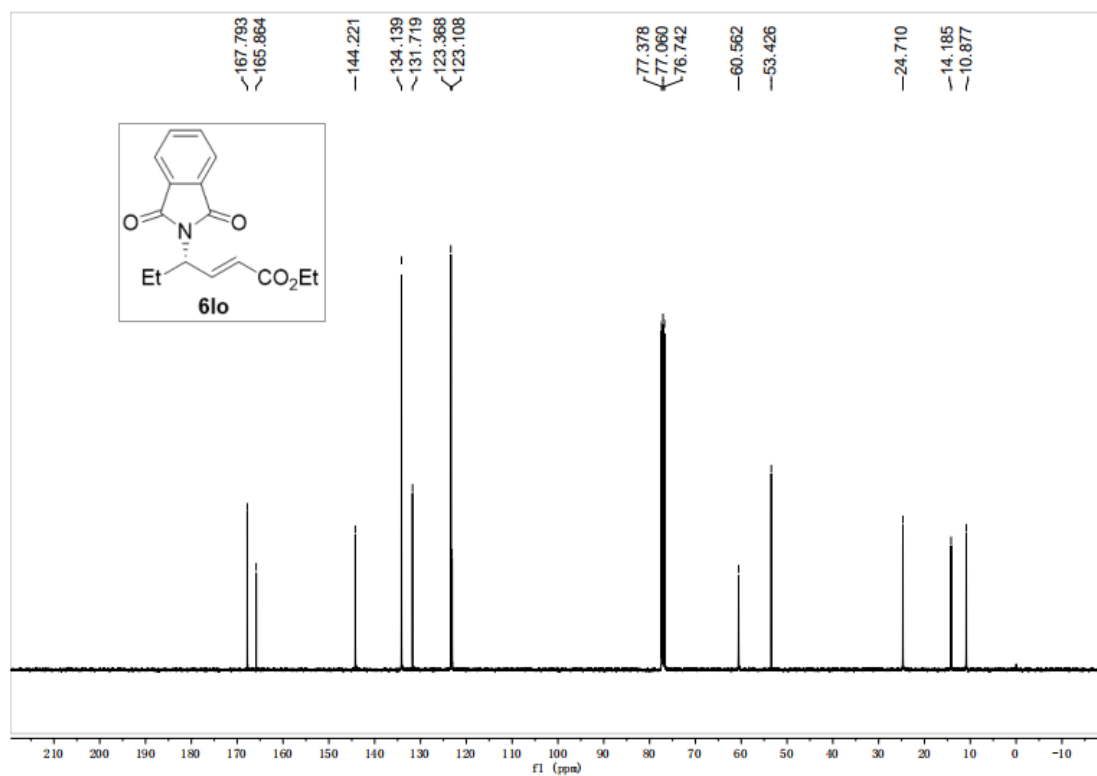

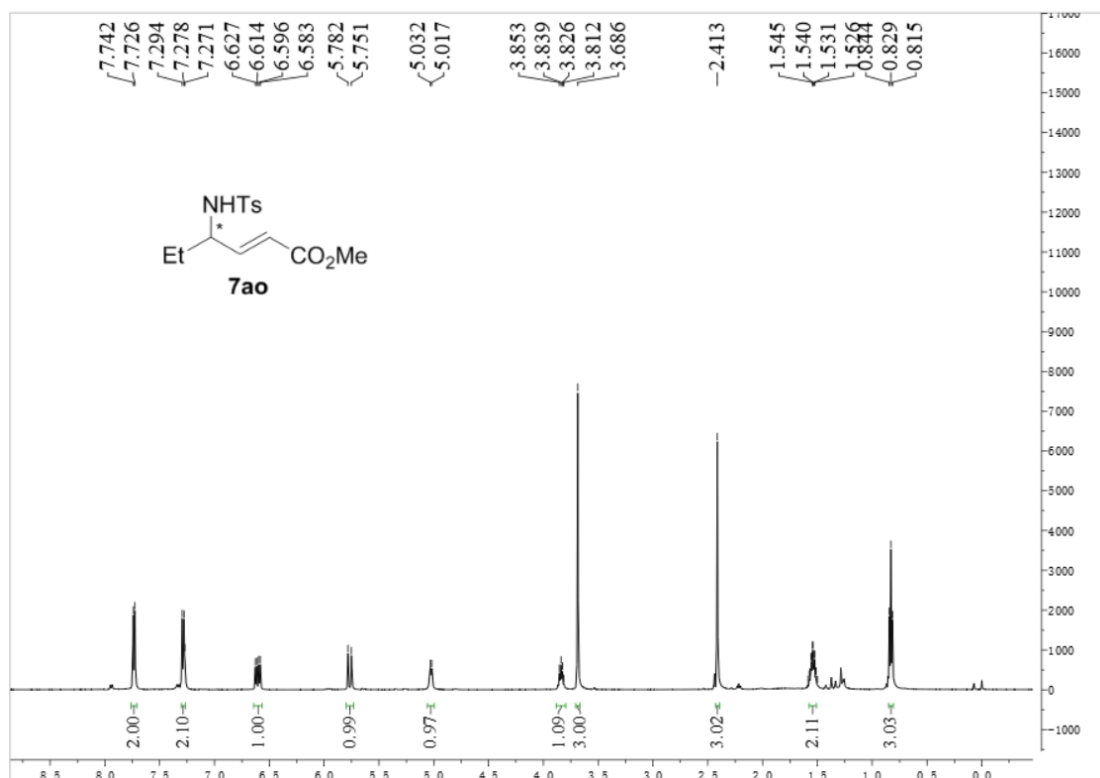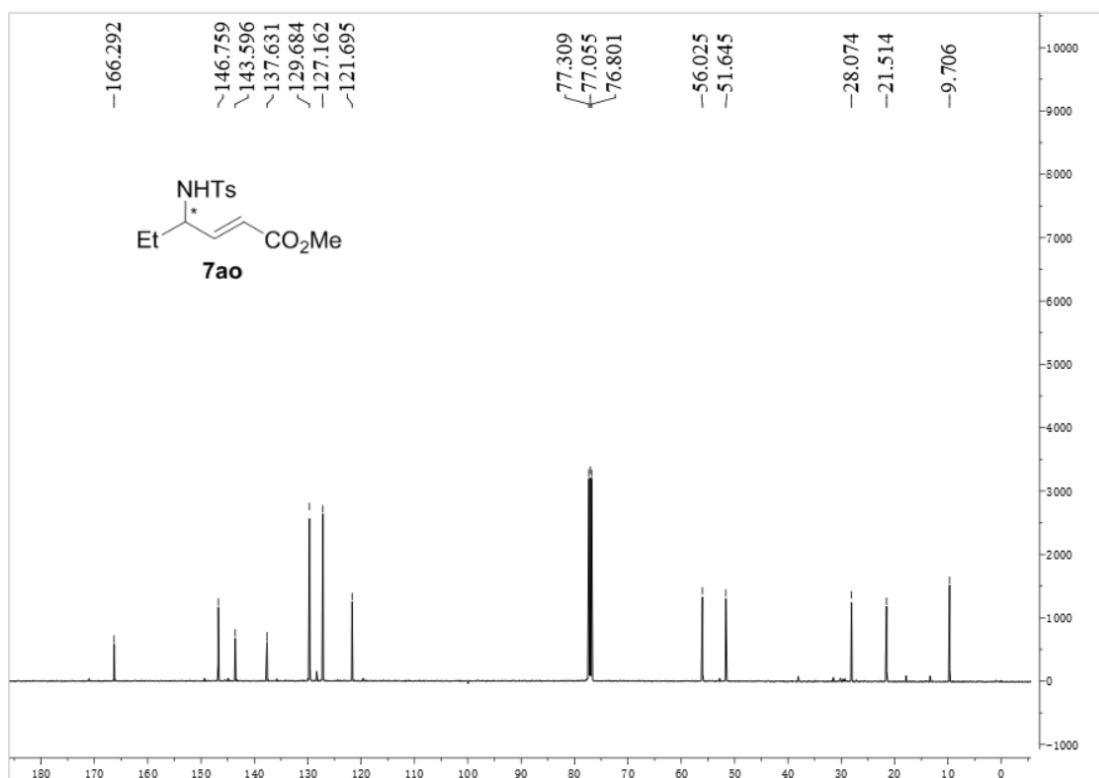

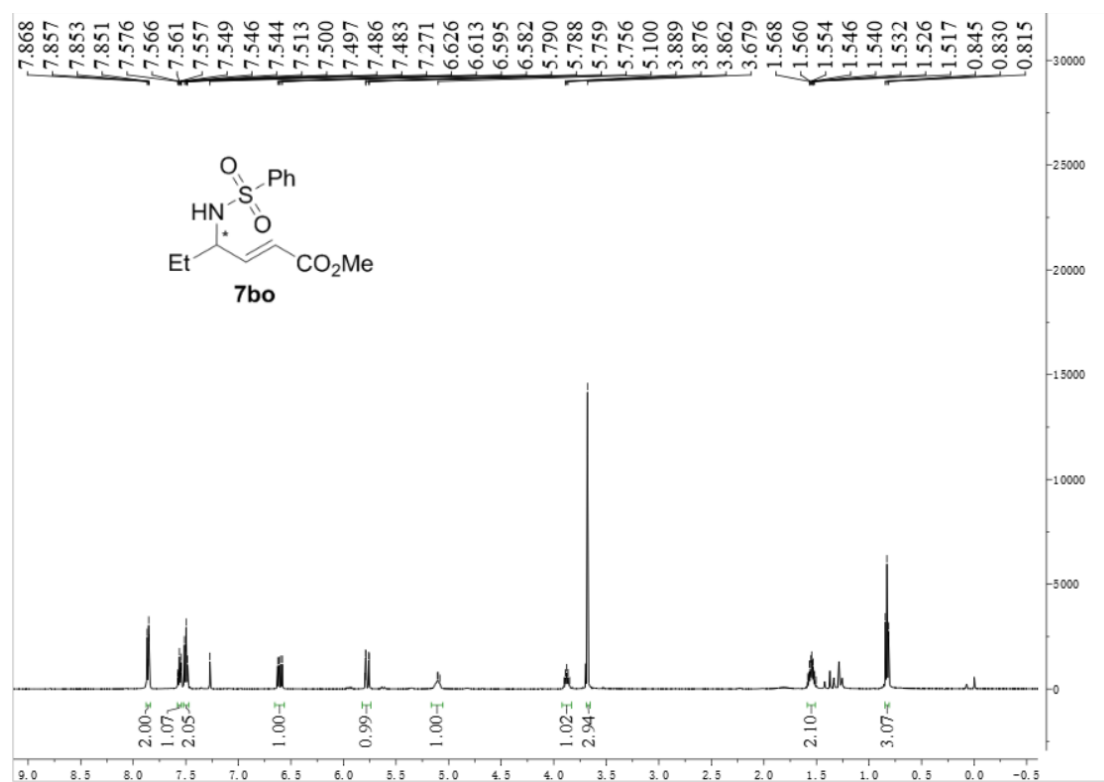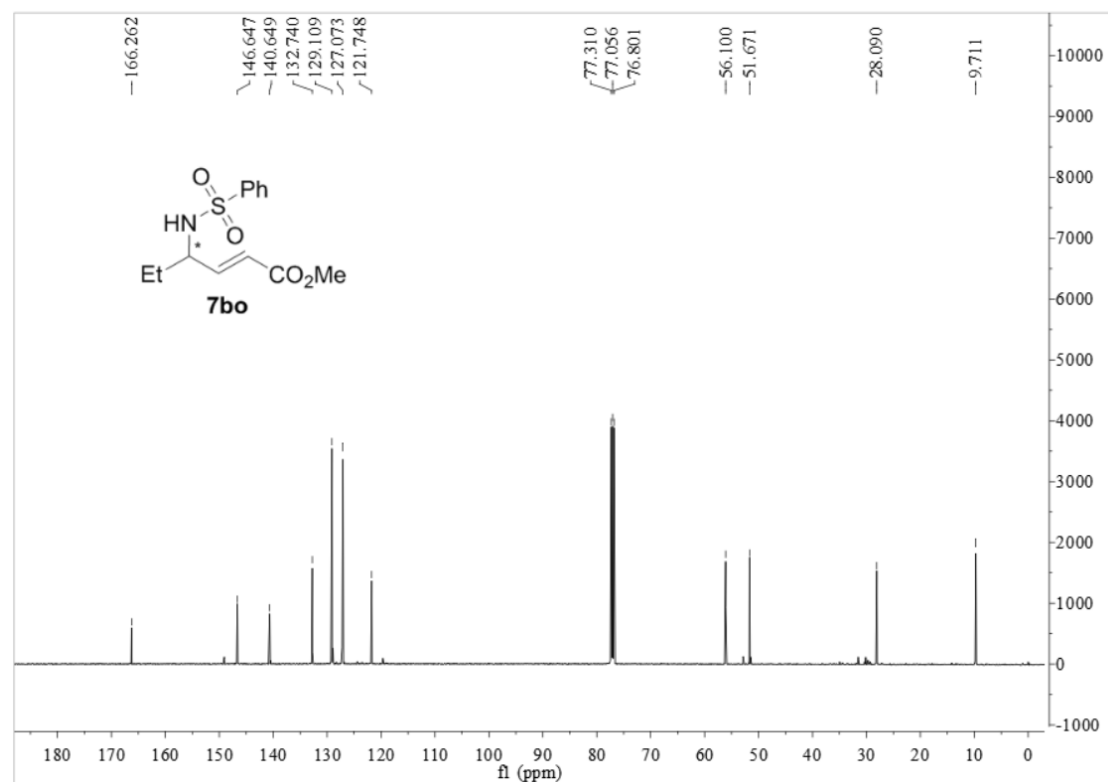



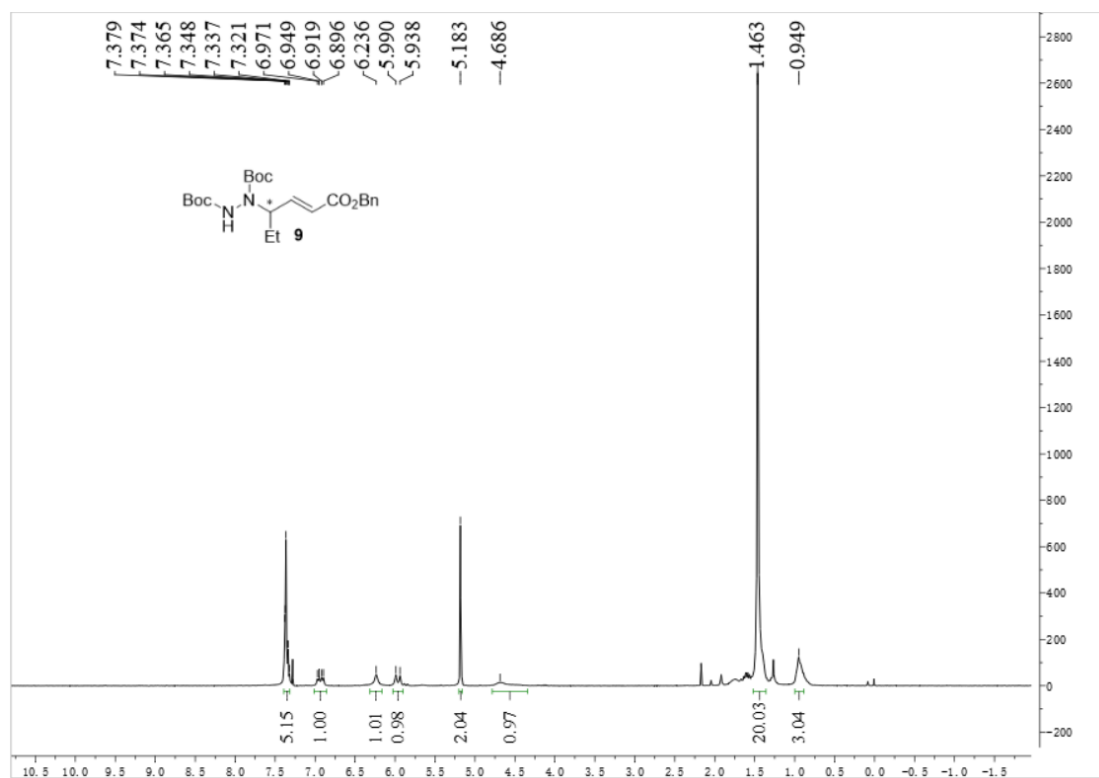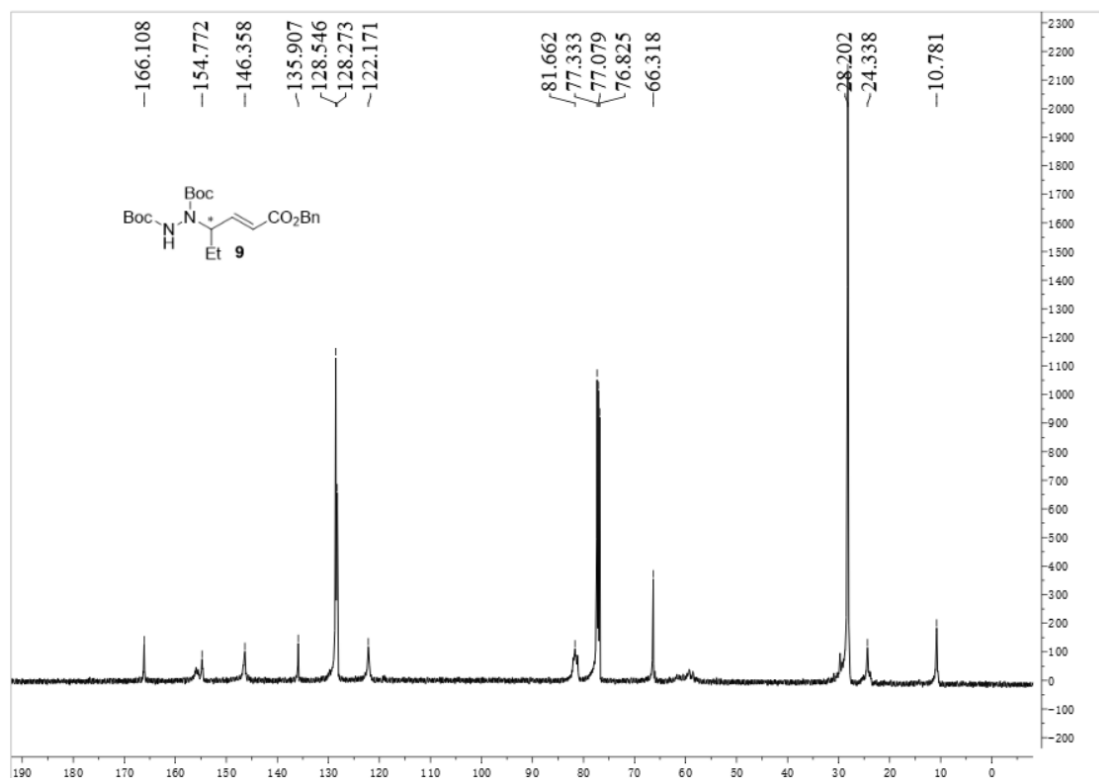

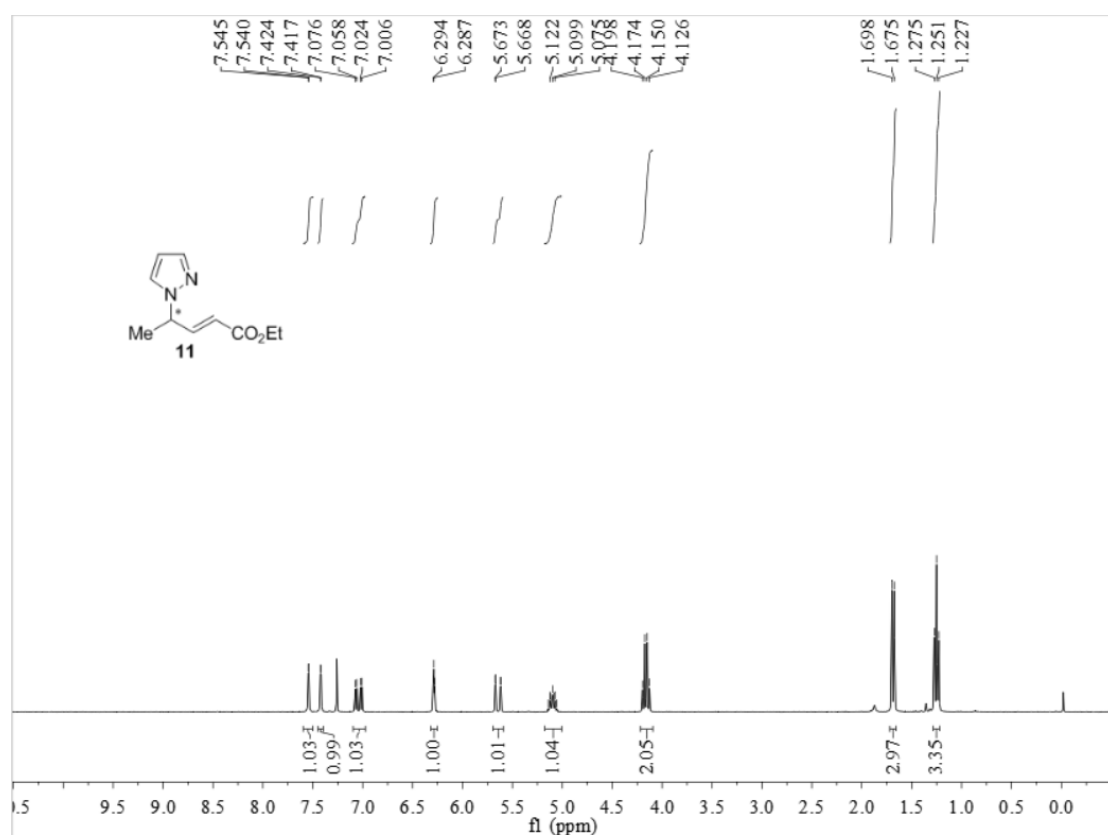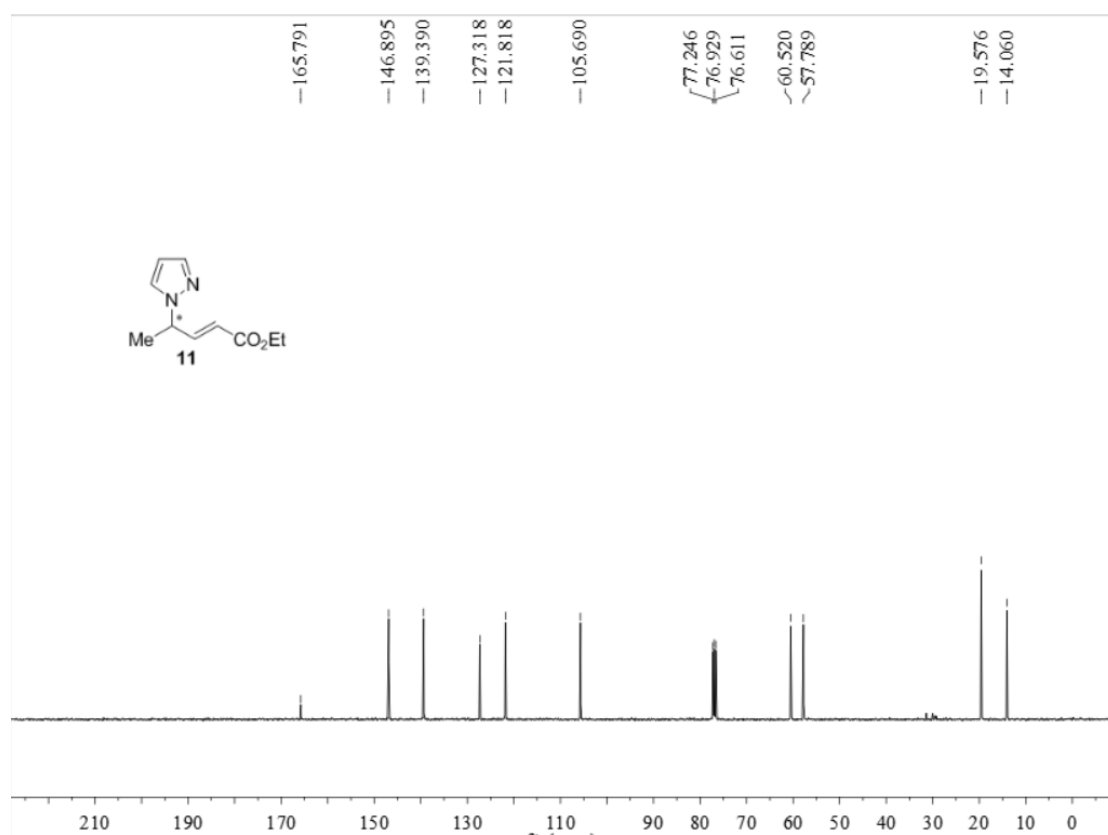

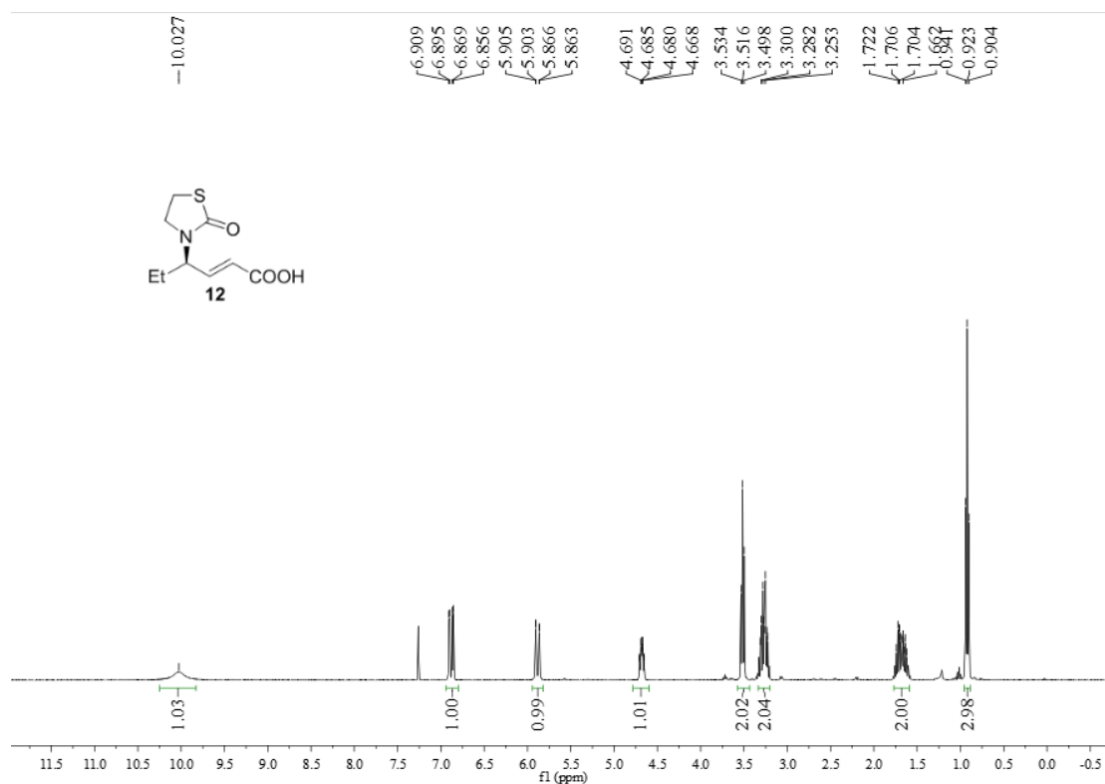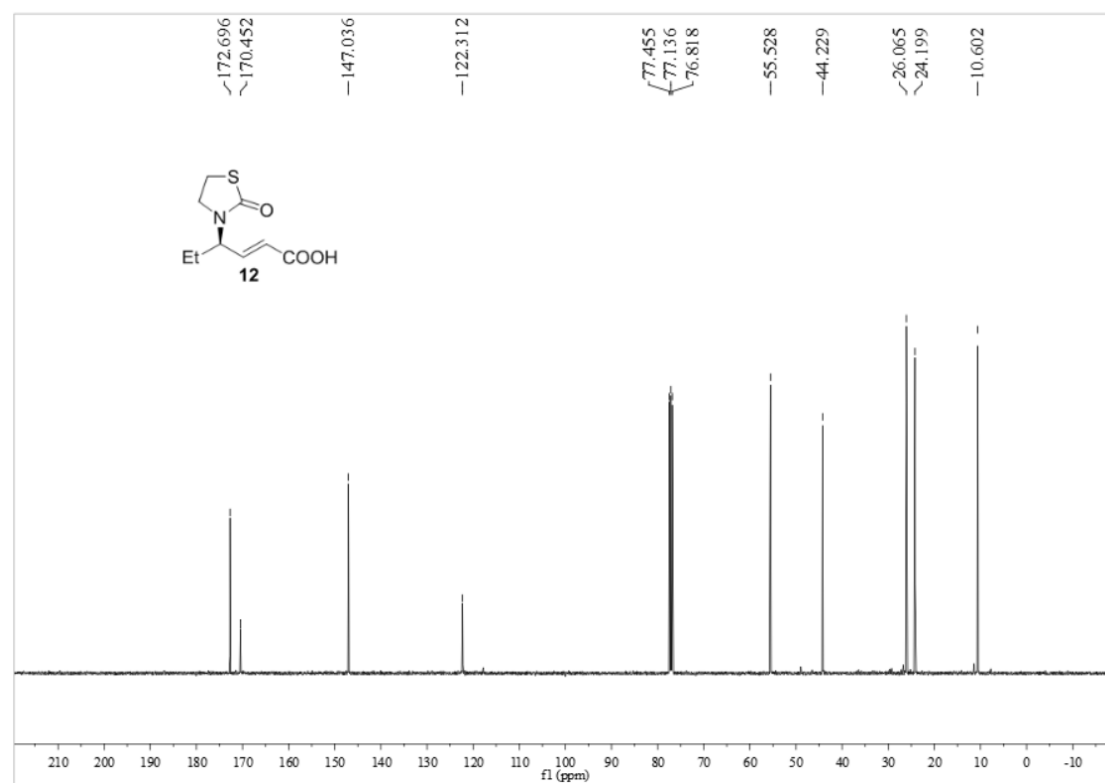

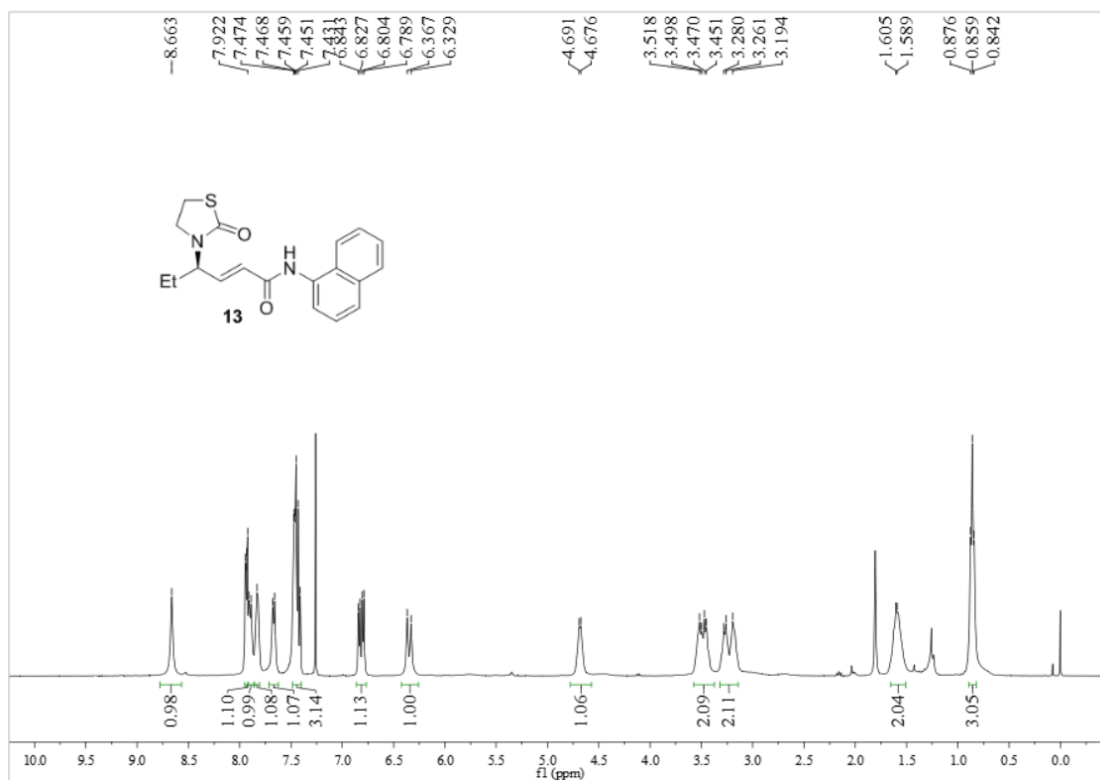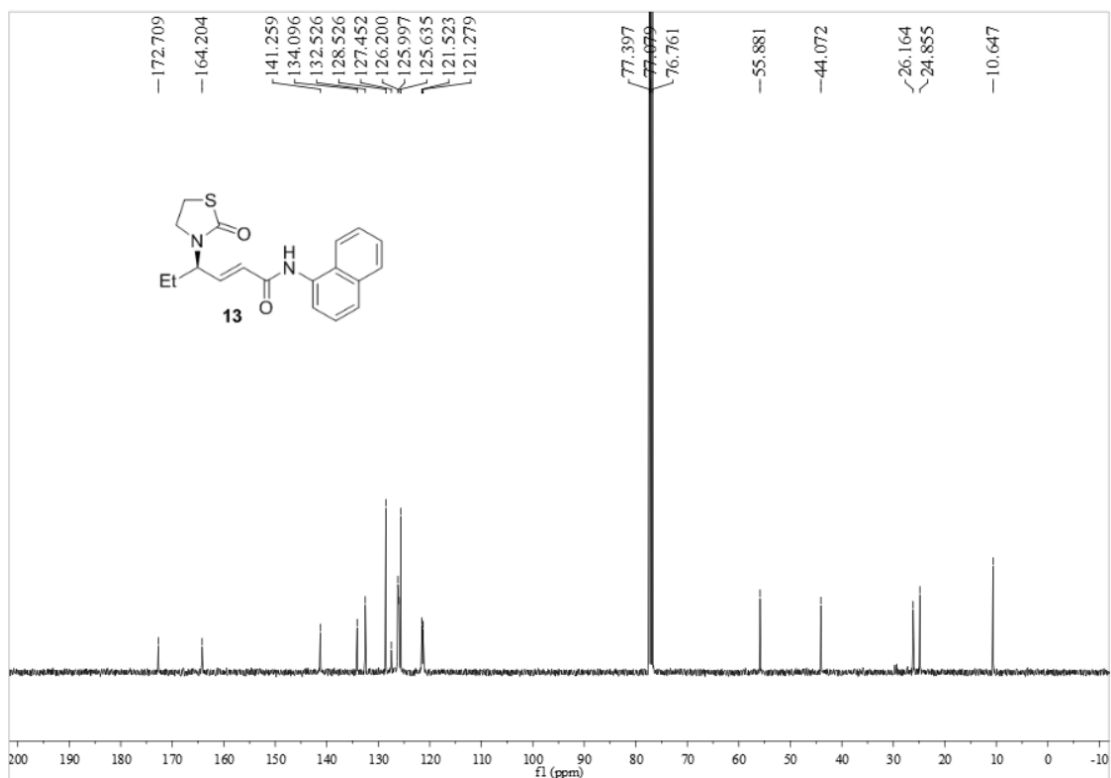

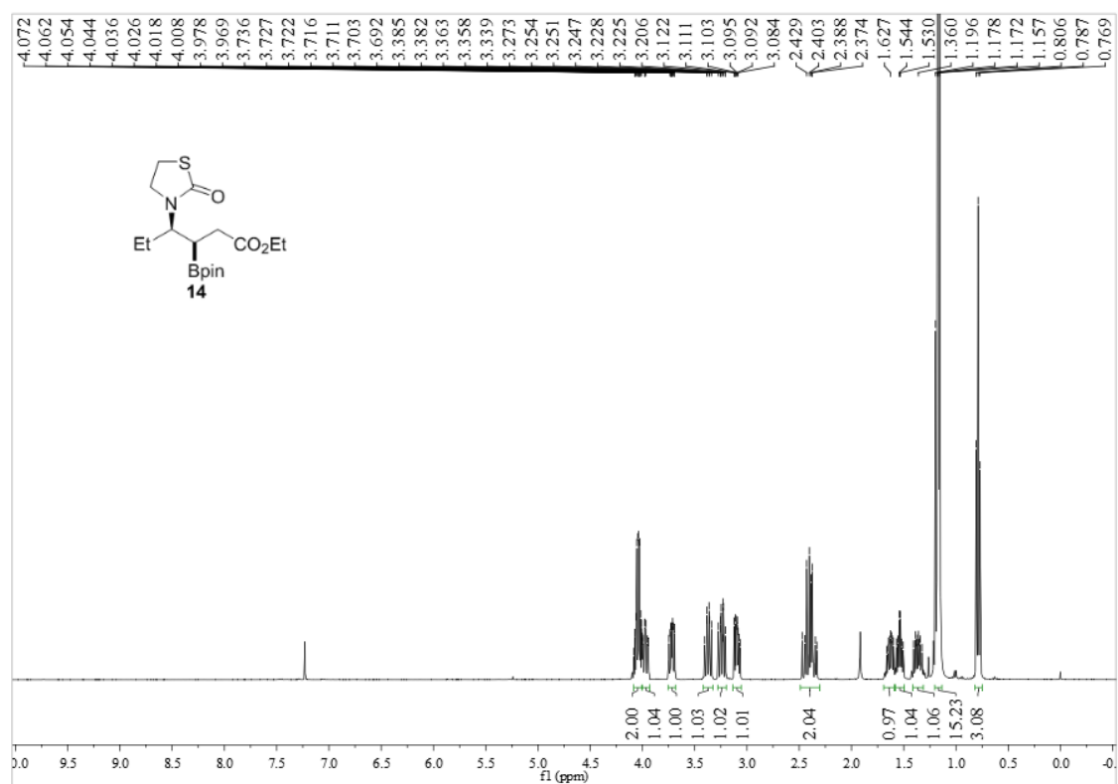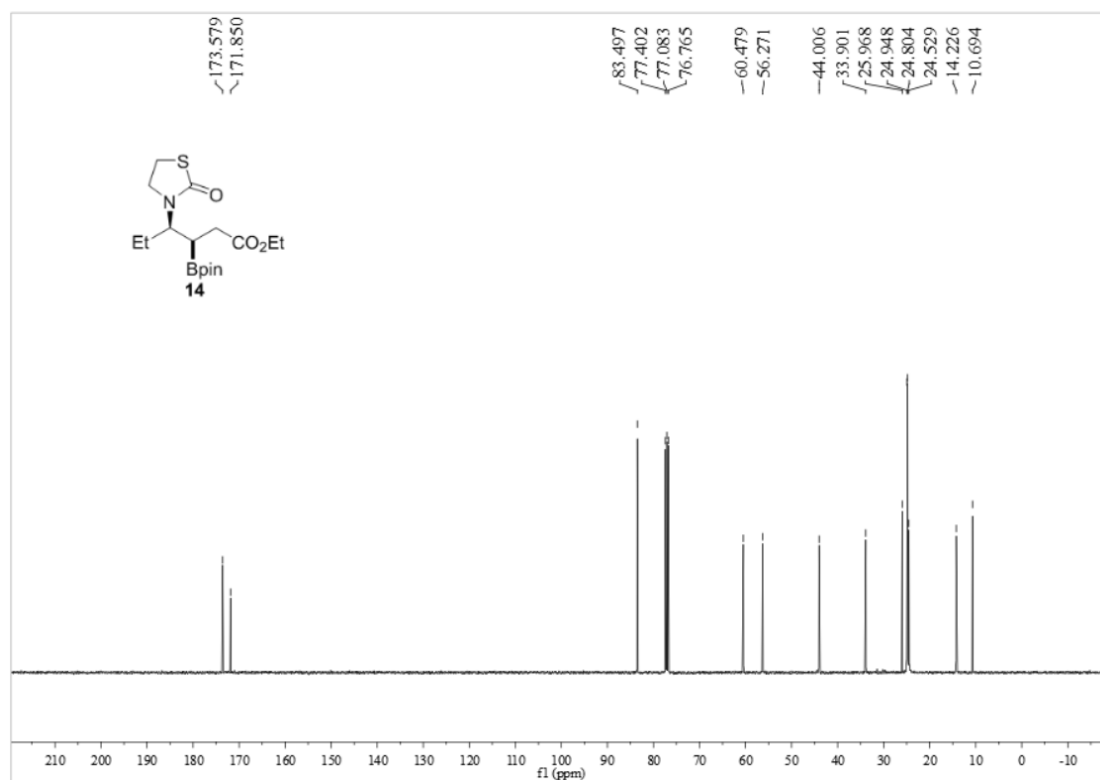

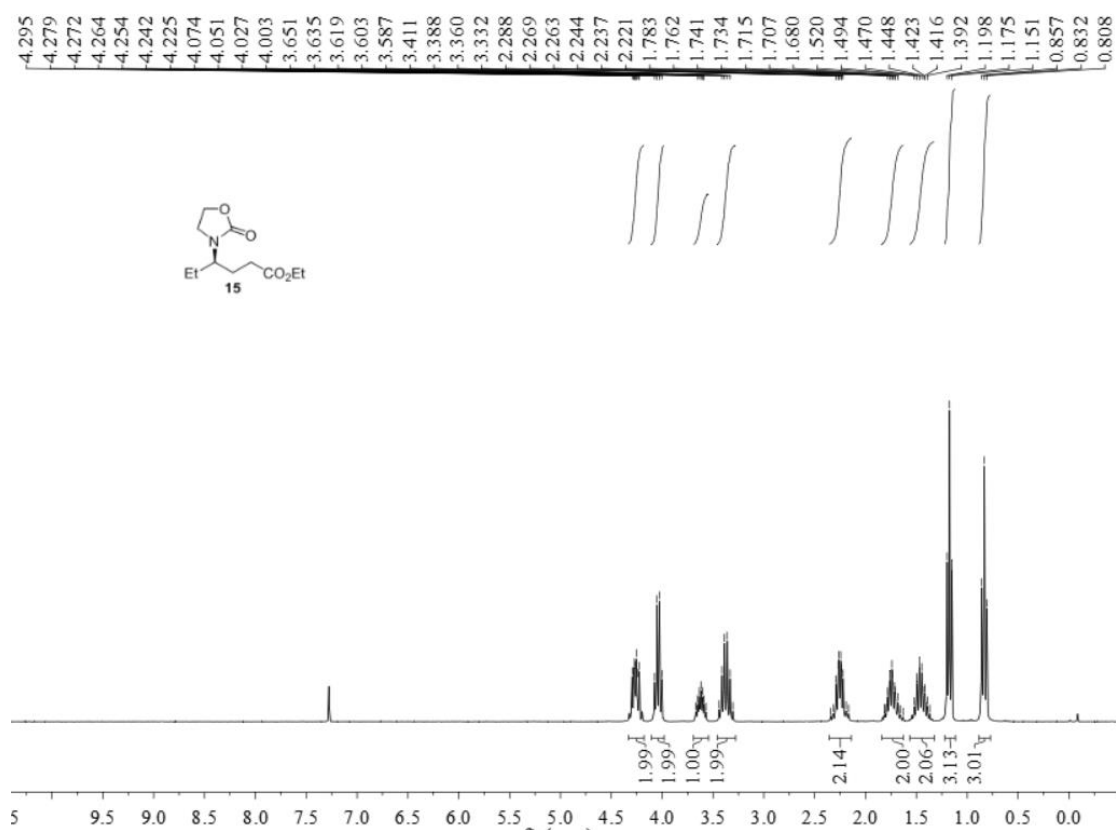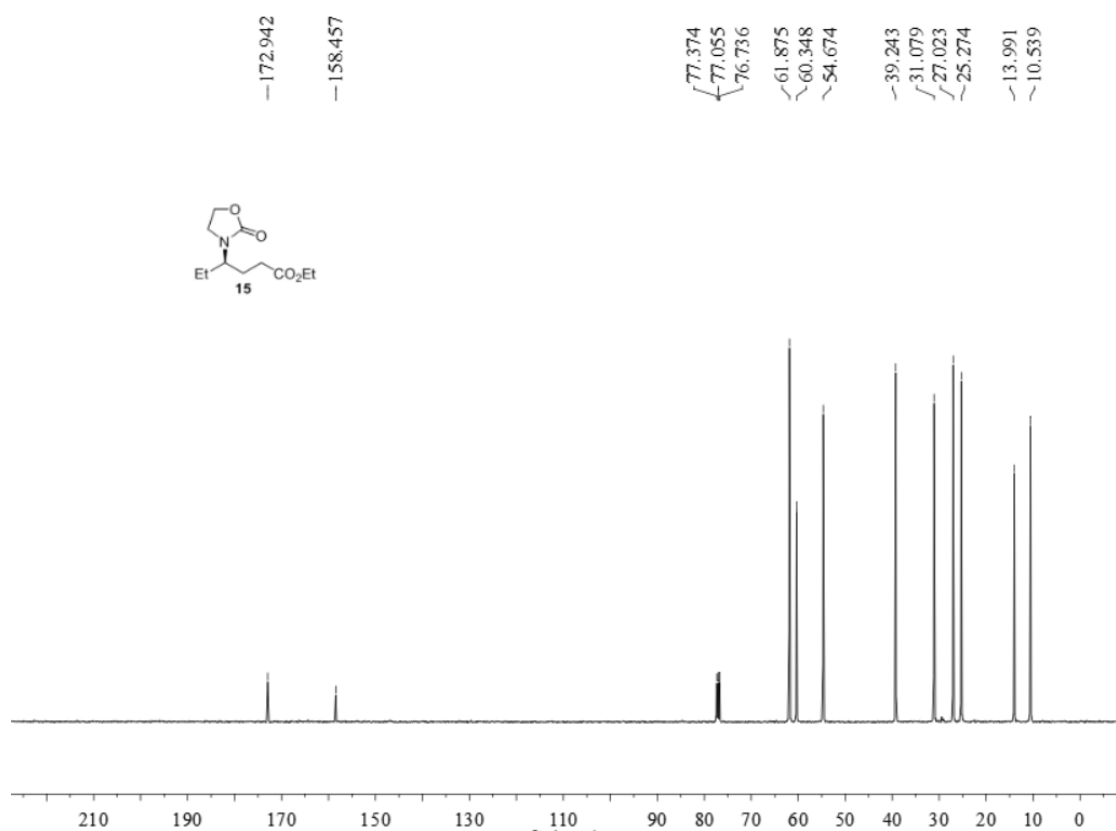

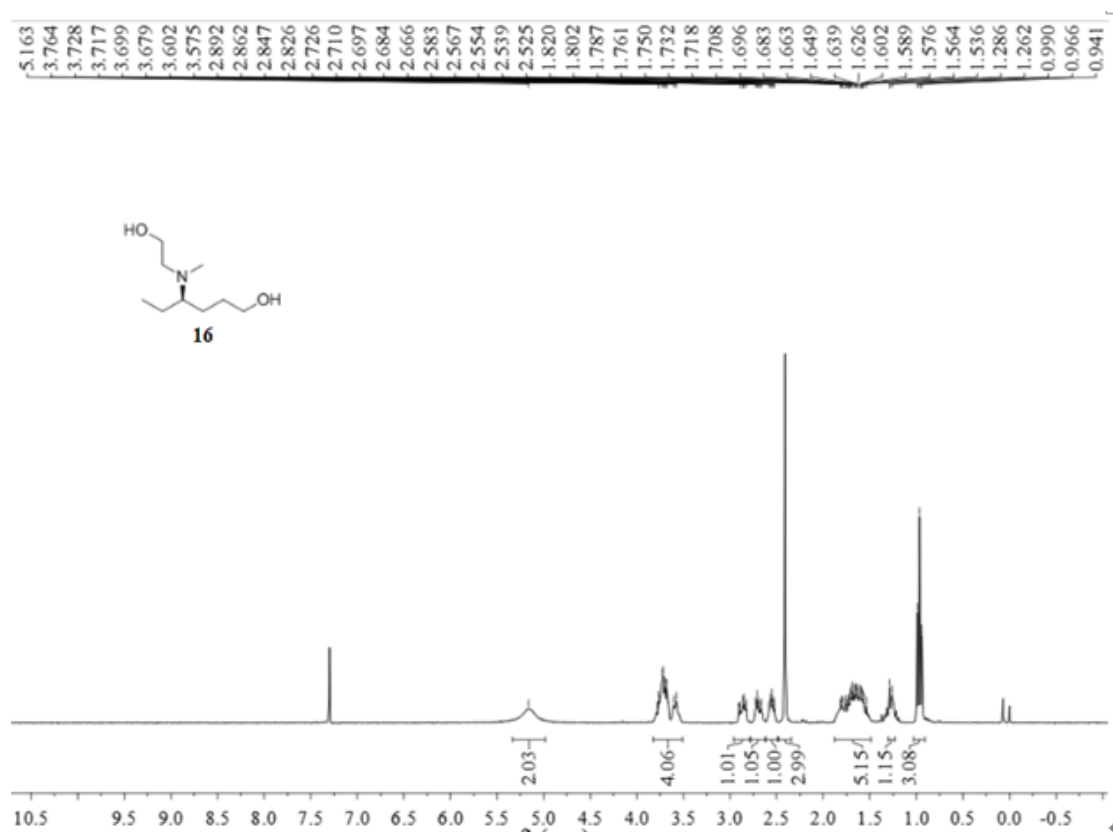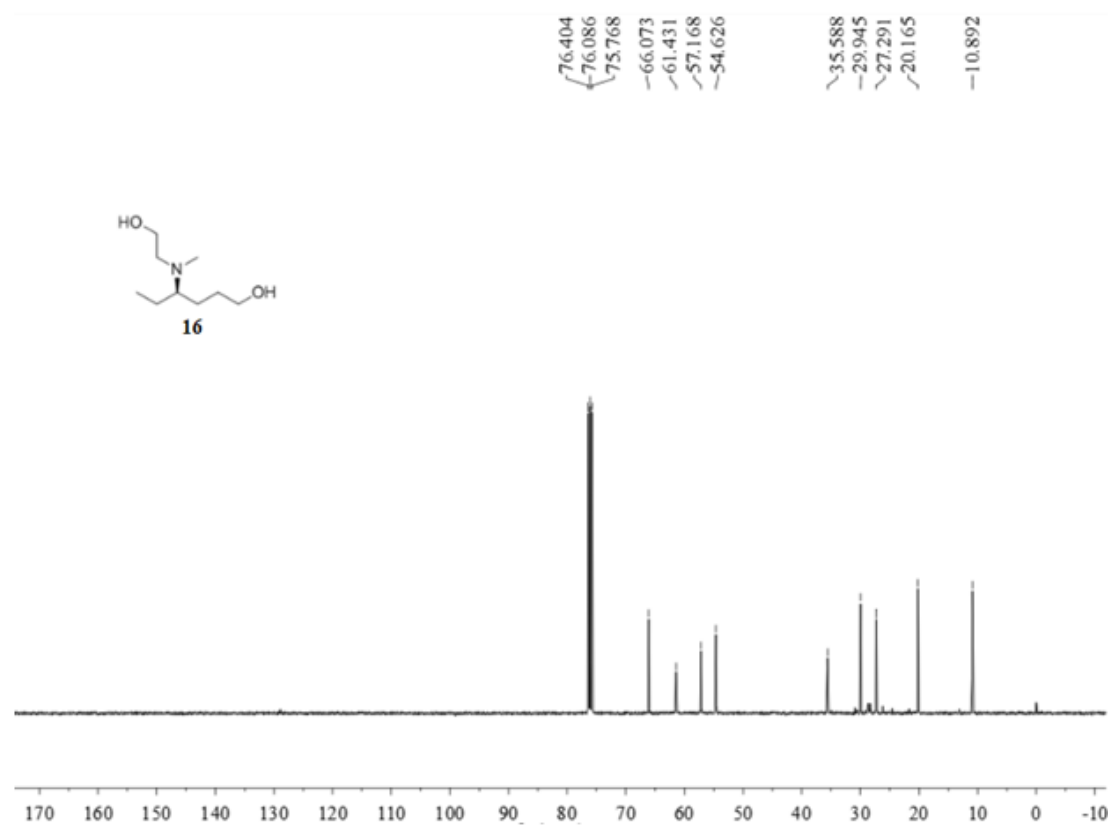

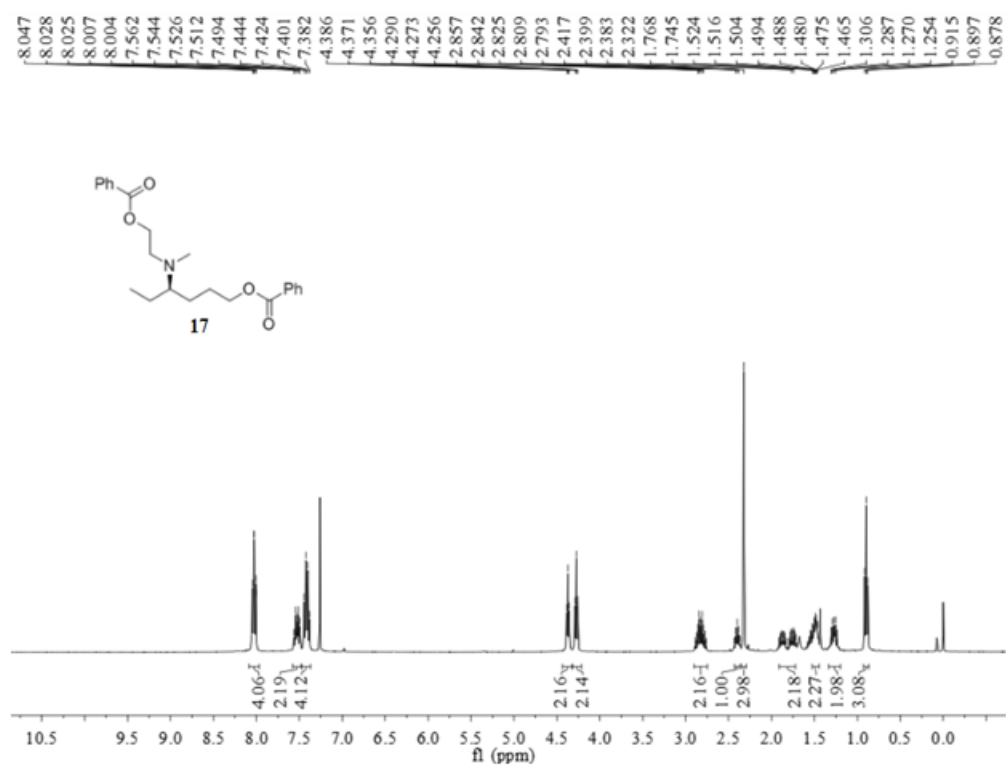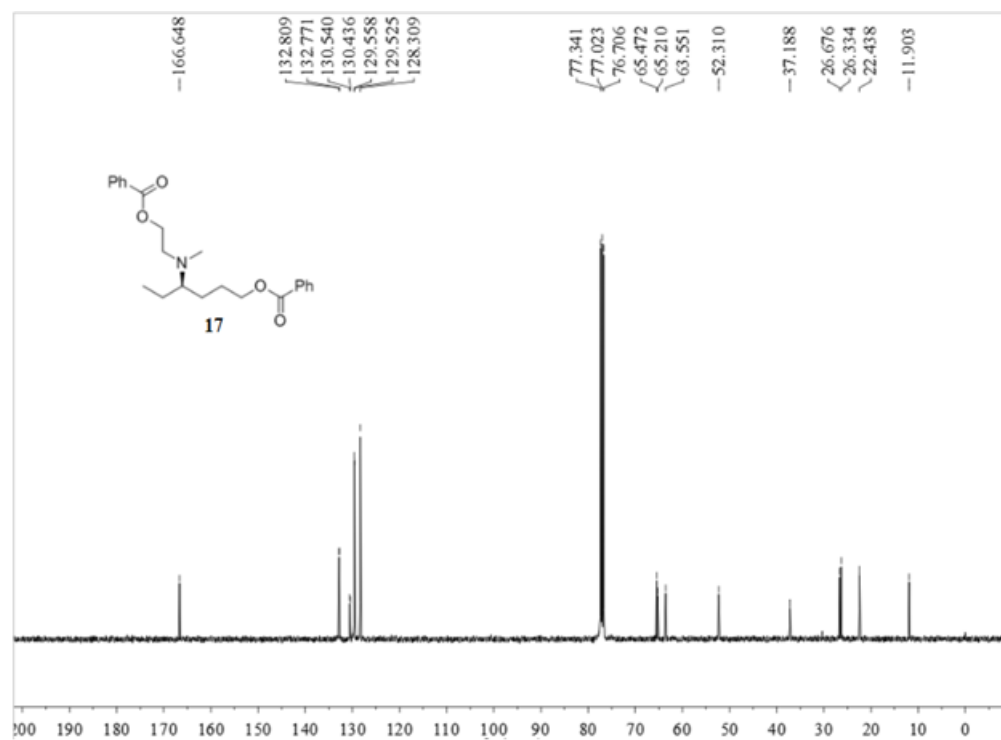



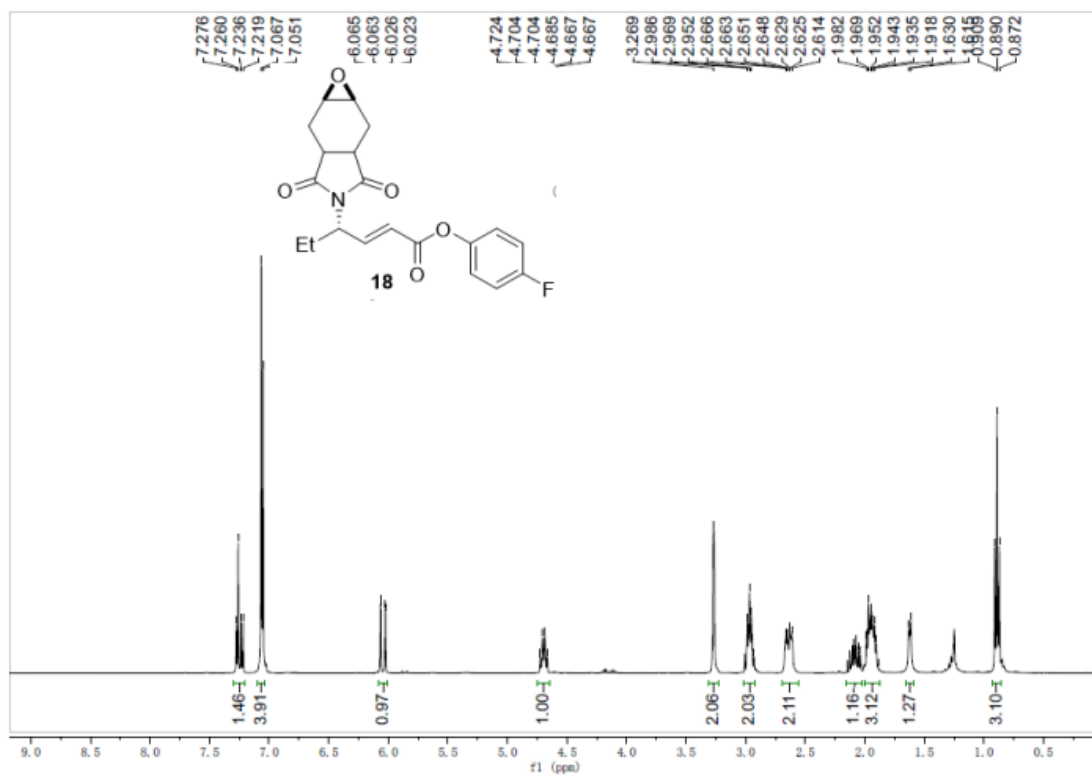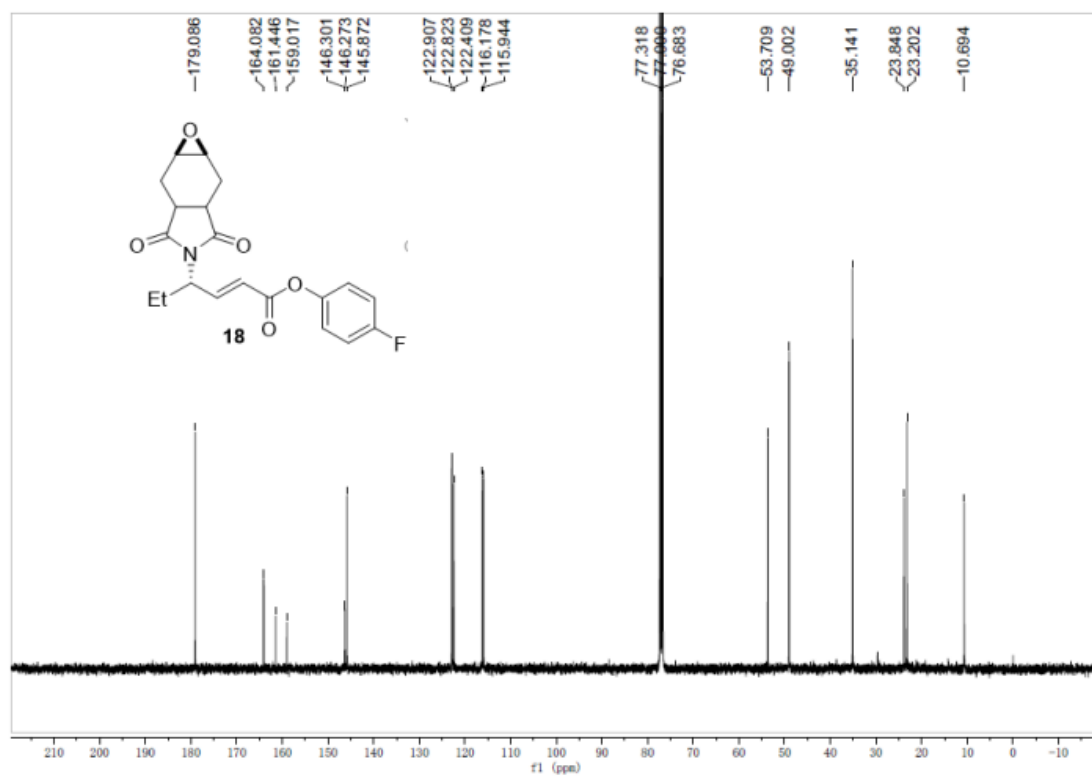

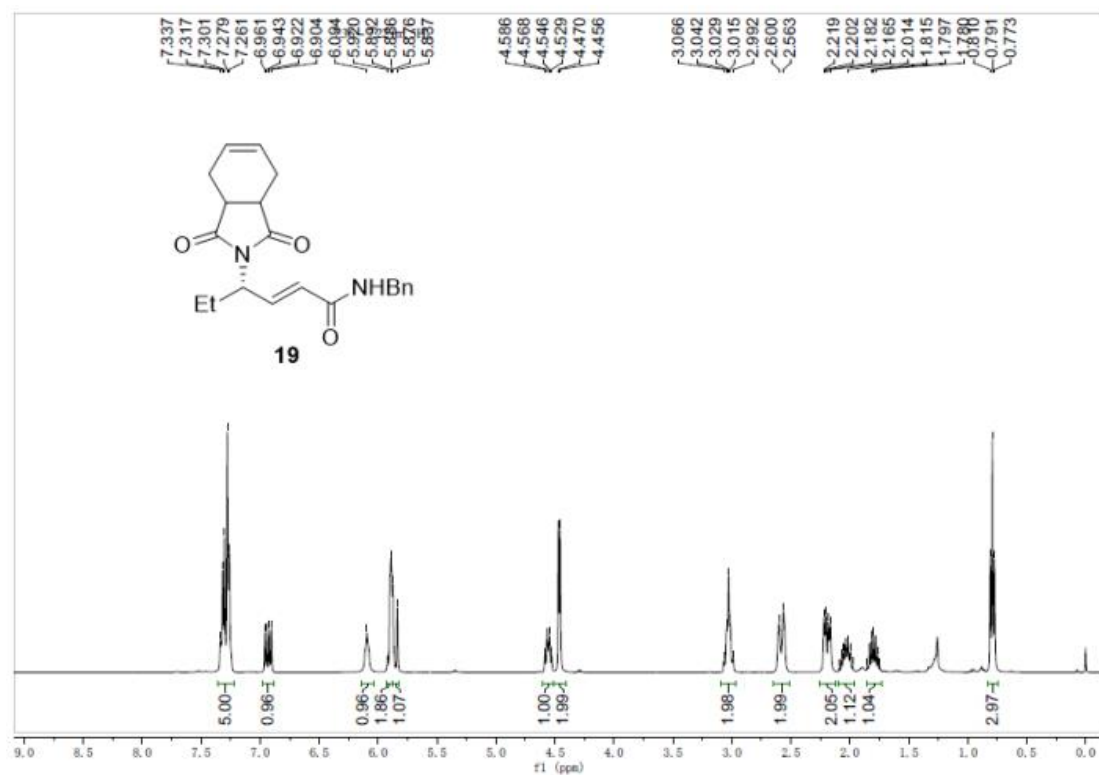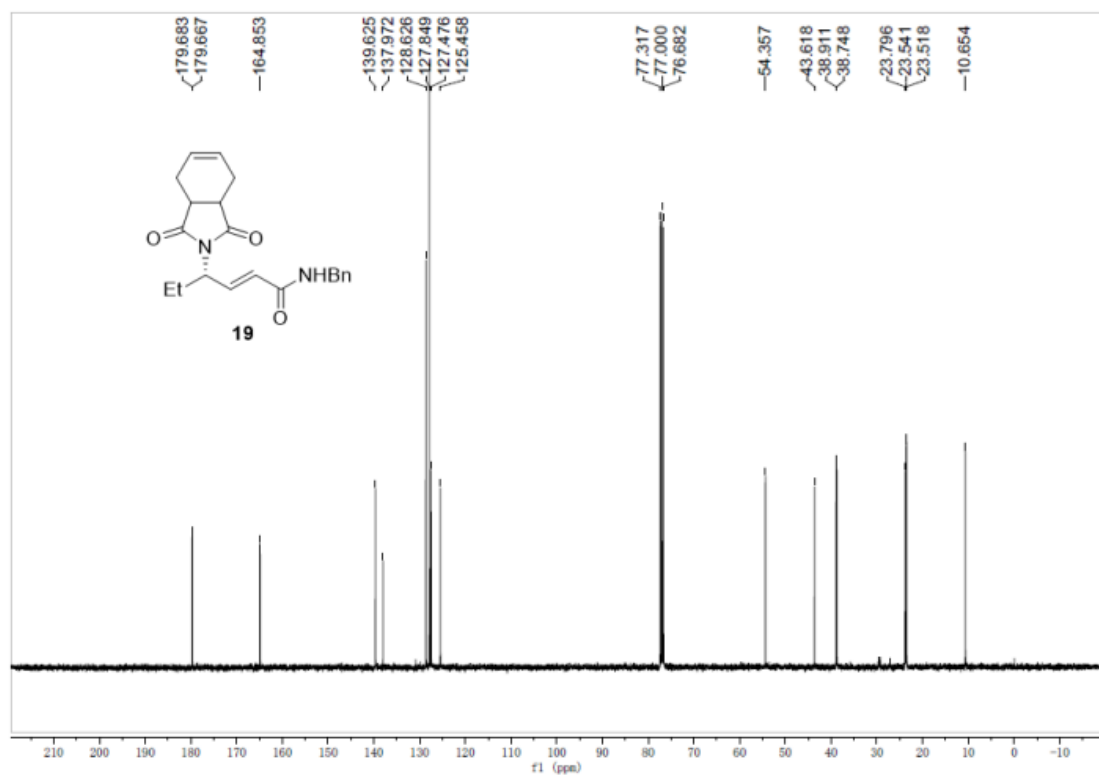

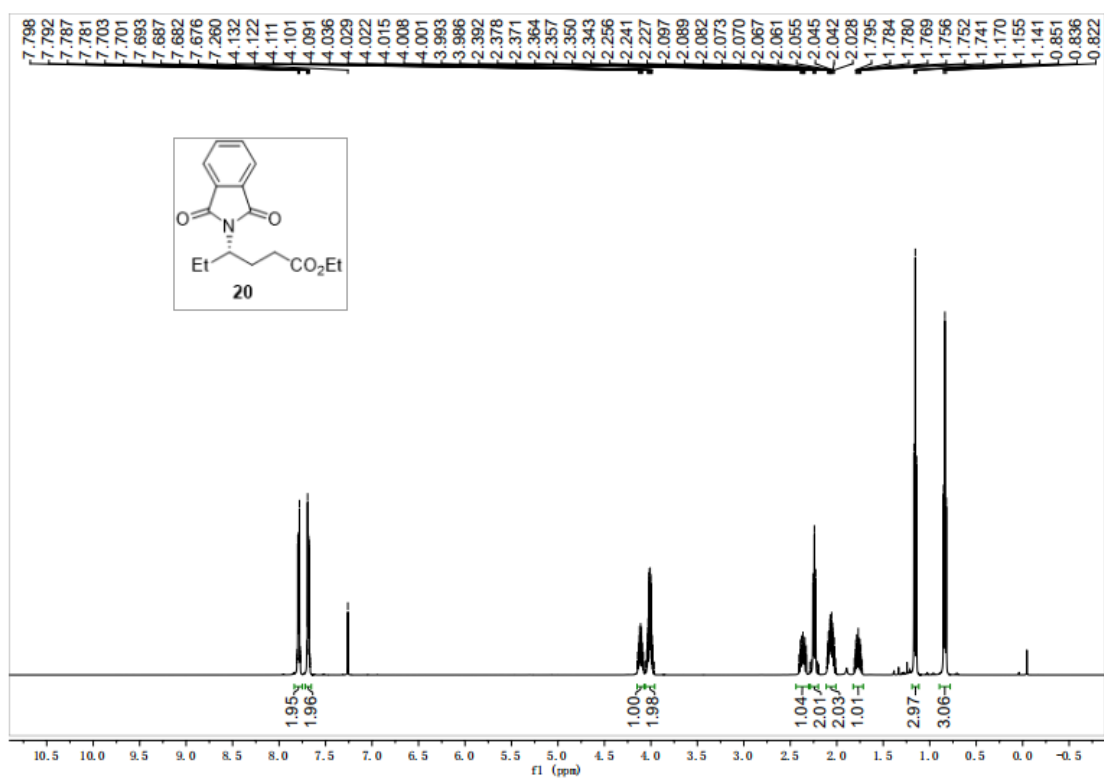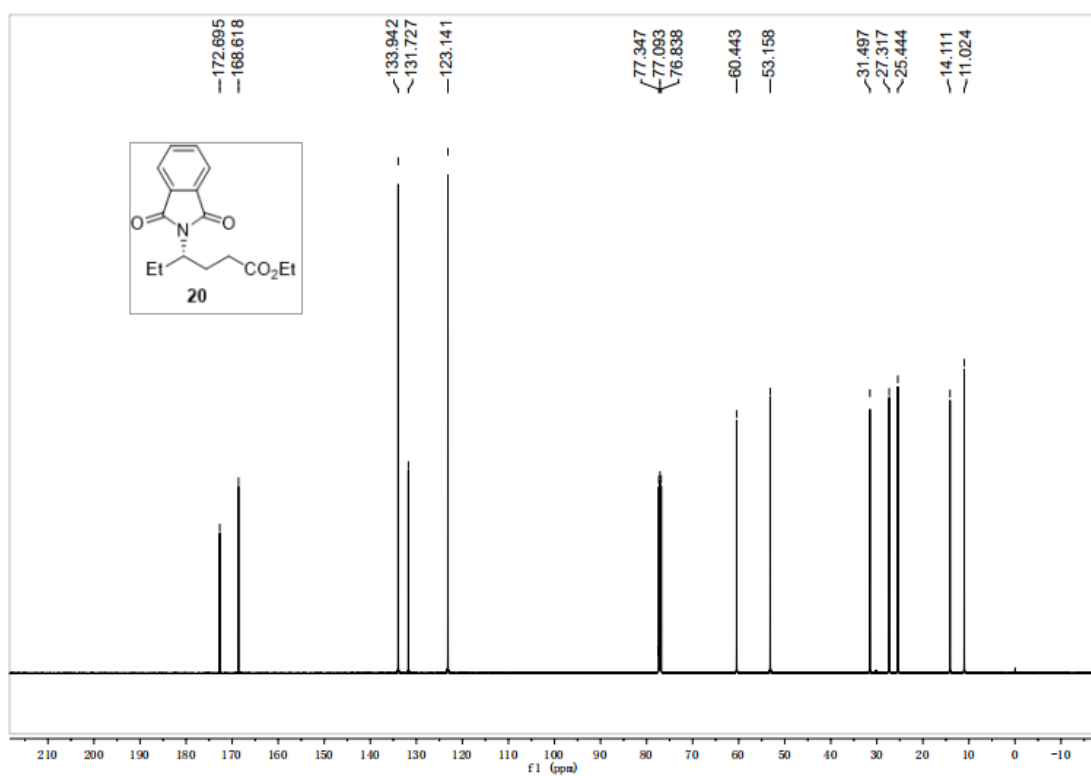

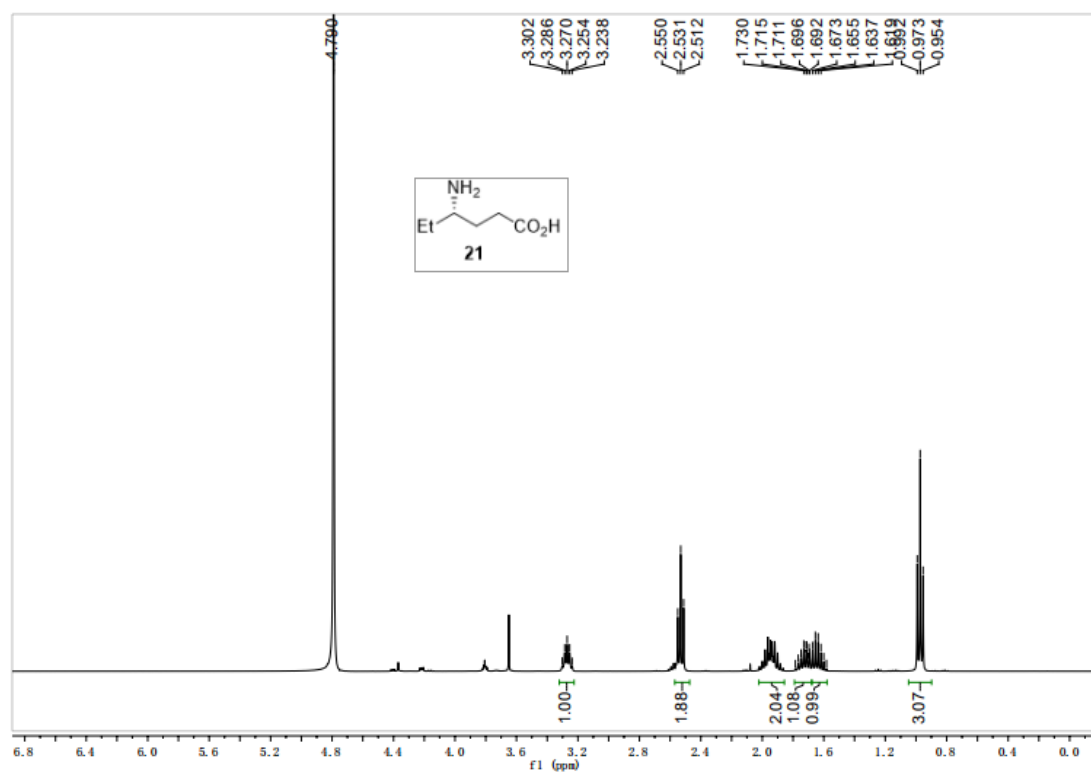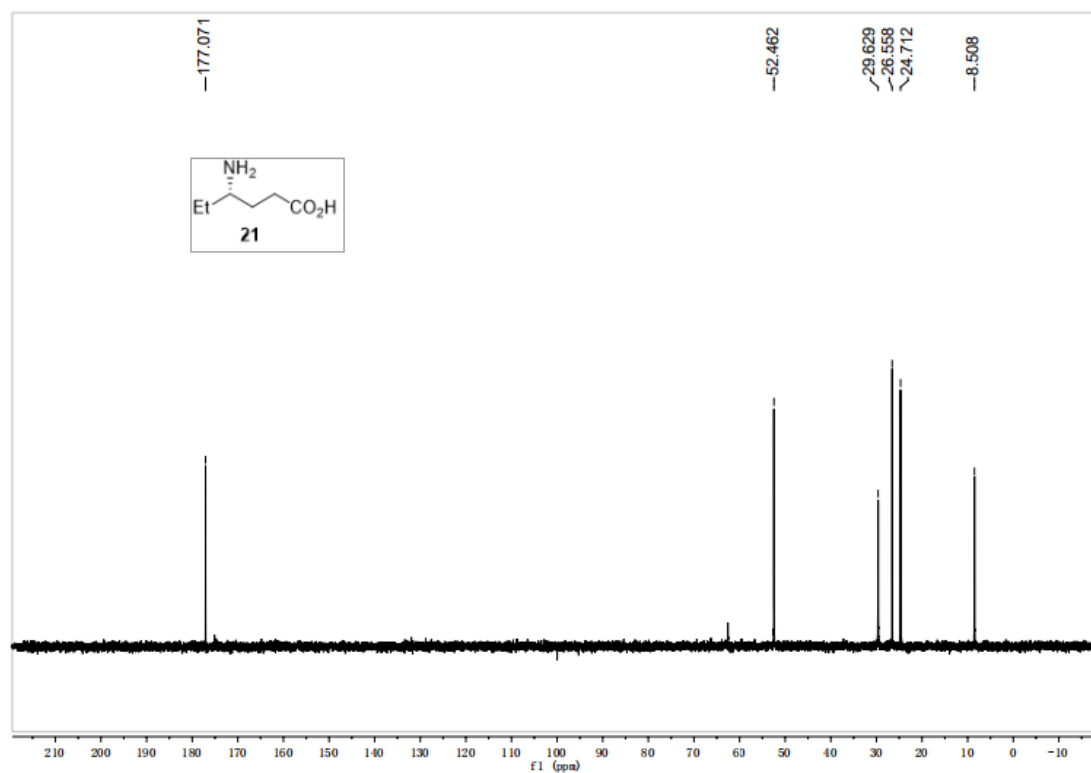

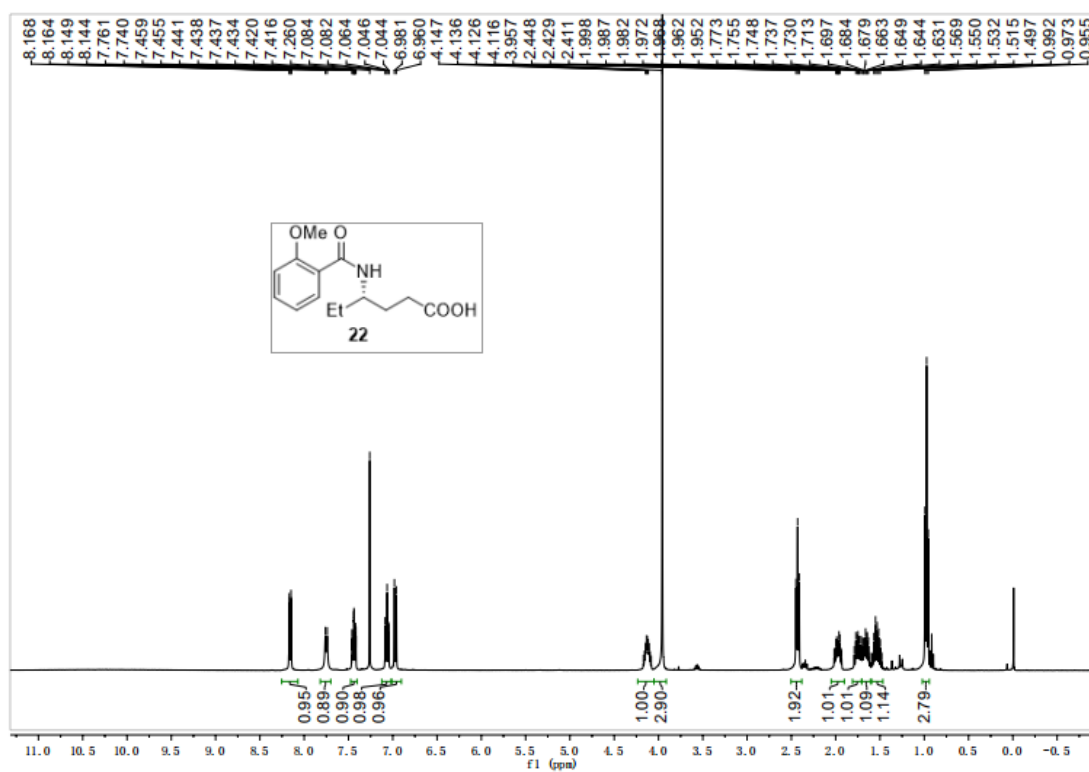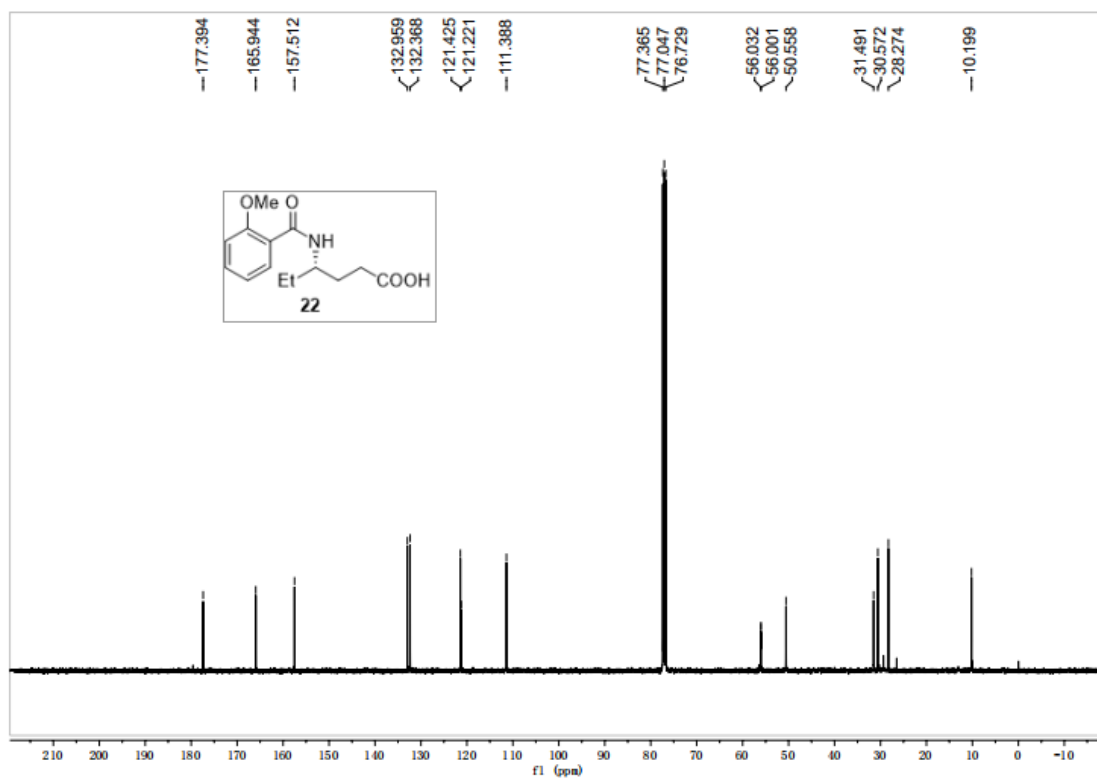

Supplement: c9sc04073k1.pdf [file c9sc04073k1.pdf]
